# Supplementary material for: Principles of dengue virus evolvability derived from genotype-fitness maps in human and mosquito cells
Source: eLife journal article supplement (doi:10.7554/elife.61921), 2021-01-25
Supplement: supp [file elife-61921-supp-v1.zip]

Archive with 13 entries (13 files):
- elife_poa_e61921_Figure_1_figure_supplement_1.pdf
- elife_poa_e61921_Figure_2_figure_supplement_1.pdf
- elife_poa_e61921_Figure_3_figure_supplement_1.pdf
- elife_poa_e61921_Figure_4_figure_supplement_1.pdf
- elife_poa_e61921_Figure_5_figure_supplement_1.pdf
- elife_poa_e61921_Transparent_Reporting_File.docx
- elife_poa_e61921_Video_1.mp4
- elife_poa_e61921_Supplementary_file_1.zip
- elife_poa_e61921_Supplementary_file_2.txt
- elife_poa_e61921_Figure_6_source_data_1.xlsx
- elife_poa_e61921_Figure_6_source_data_2.csv
- elife_poa_e61921_Figure_1_source_data_2.txt
- elife_poa_e61921_Figure_1_source_data_1.txt
