# Supplementary material for: Principles of dengue virus evolvability derived from genotype-fitness maps in human and mosquito cells
Source: eLife journal article supplement (doi:10.7554/elife.61921), 2021-01-25
Supplement: supp [file elife-61921-supp-v1.zip › elife_poa_e61921_Figure_1_source_data_1.txt]

TestedHost	AdaptedHost	Comparison	set	passage	bioRep	Rep1.1	Rep1.2	Rep1.3	Rep1.4	mean1	sd1
C6/36	Huh7	Alternative	A	1	1	12630	15220	13070	12860	13445	1196.89877
C6/36	Huh7	Alternative	A	2	1	6607	7694	7349	7655	7326.25	503.7045265
C6/36	Huh7	Alternative	A	3	1	23.16	25.34	28.17	25.97	25.66	2.061439626
C6/36	Huh7	Alternative	A	4	1	1150	1168	1319	1331	1242	96.24621205
C6/36	Huh7	Alternative	A	5	1	2382	2410	2649	2707	2537	164.9222039
C6/36	Huh7	Alternative	A	6	1	1602	1984	2133	2321	2010	304.9535484
C6/36	Huh7	Alternative	A	7	1	1504	1576	1712	1845	1659.25	150.9069802
C6/36	Huh7	Alternative	A	8	1	709.7	822.9	779.8	956.1	817.125	103.7315245
C6/36	Huh7	Alternative	A	9	1	3711	3850	4156	4306	4005.75	273.1670734
C6/36	Huh7	Alternative	B	1	1	4308	5499	4725	4362	4723.5	549.1584471
C6/36	Huh7	Alternative	B	2	1	10510	14160	12700	12380	12437.5	1500.49714
C6/36	Huh7	Alternative	B	3	1	7100	8320	8420	8370	8052.5	636.3109827
C6/36	Huh7	Alternative	B	4	1	8054	9066	9417	9302	8959.75	621.258065
C6/36	Huh7	Alternative	B	5	1	6531	7882	7484	7730	7406.75	606.4263489
C6/36	Huh7	Alternative	B	6	1	352.7	444.2	469.8	487.8	438.625	60.01179745
C6/36	Huh7	Alternative	B	7	1	774.8	923.9	944.2	1024	916.725	104.014402
C6/36	Huh7	Alternative	B	8	1	371.4	458.4	480.4	540.9	462.775	70.19659892
C6/36	Huh7	Alternative	B	9	1	516.3	512.6	603.3	603.3	558.875	51.31980612
Huh7	C6/36	Alternative	A	1	1	7062	8406	9138	7070	7919	1029.300734
Huh7	C6/36	Alternative	A	2	1	5045	5114	6708	5706	5643.25	769.3371064
Huh7	C6/36	Alternative	A	3	1	7940	7919	10430	8486	8693.75	1186.886789
Huh7	C6/36	Alternative	A	4	1	7455	7911	11390	9296	9013	1767.482767
Huh7	C6/36	Alternative	A	5	1	5927	6382	7517	7123	6737.25	716.3613497
Huh7	C6/36	Alternative	A	6	1	2789	2993	3797	3627	3301.5	486.243766
Huh7	C6/36	Alternative	A	7	1	3944	3722	4785	4536	4246.75	496.7892746
Huh7	C6/36	Alternative	A	8	1	1959	2086	2696	2677	2354.5	386.9285033
Huh7	C6/36	Alternative	A	9	1	1722	1590	1976	1915	1800.75	177.3722545
Huh7	C6/36	Alternative	B	1	1	6175	8100	7467	6613	7088.75	861.5831842
Huh7	C6/36	Alternative	B	2	1	3867	4707	4889	4420	4470.75	446.4066718
Huh7	C6/36	Alternative	B	3	1	6228	7732	7953	6967	7220	784.7517654
Huh7	C6/36	Alternative	B	4	1	13720	15970	18010	15840	15885	1752.341291
Huh7	C6/36	Alternative	B	5	1	8956	11560	12390	10460	10841.5	1484.895844
Huh7	C6/36	Alternative	B	6	1	3780	5411	5486	5438	5028.75	833.0775774
Huh7	C6/36	Alternative	B	7	1	2353	2630	2847	2874	2676	241.4470266
Huh7	C6/36	Alternative	B	8	1	2248	3145	3088	3410	2972.75	503.1244876
Huh7	C6/36	Alternative	B	9	1	544	614.1	639.1	681.2	619.6	57.50484038
Huh7	Huh7	Adapted	A	1	2	4049	4624	4314	4154	4285.25	250.7447241
Huh7	Huh7	Adapted	A	2	2	5615	5518	6071	6426	5907.5	421.4423646
Huh7	Huh7	Adapted	A	3	2	1485	1422	1677	1719	1575.75	144.5069202
Huh7	Huh7	Adapted	A	4	2	6054	5389	6331	6379	6038.25	455.9191266
Huh7	Huh7	Adapted	A	5	2	9039	8171	10020	9274	9126	761.7379252
Huh7	Huh7	Adapted	A	6	2	5173	5739	6907	7103	6230.5	927.143822
Huh7	Huh7	Adapted	A	7	2	8570	7774	9591	9131	8766.5	782.3743776
Huh7	Huh7	Adapted	A	8	2	9512	9346		13090	10649.33333	2115.308331
Huh7	Huh7	Adapted	A	9	2	11770	12100	11940	12080	11972.5	152.616076
Huh7	Huh7	Adapted	B	1	2	4231	4270	3850	2836	3796.75	667.9358128
Huh7	Huh7	Adapted	B	2	2	12130	11940	11420	9630	11280	1140.20466
Huh7	Huh7	Adapted	B	3	2	12780	11670	12640	10660	11937.5	984.356812
Huh7	Huh7	Adapted	B	4	2	14170	14150	13900	11750	13492.5	1168.143113
Huh7	Huh7	Adapted	B	5	2	16450	15080	15370	14390	15322.5	856.7136822
Huh7	Huh7	Adapted	B	6	2	14960	13520	12990	13670	13785	835.8827669
Huh7	Huh7	Adapted	B	7	2	16820	15770	15840	13500	15482.5	1405.901253
Huh7	Huh7	Adapted	B	8	2	17370	15100	18120	18310	17225	1473.646271
Huh7	Huh7	Adapted	B	9	2	22120	21170	24880	23030	22800	1580.99125
C6/36	C6/36	Adapted	A	1	2	10420	11630	9936	10050	10509	775.3648604
C6/36	C6/36	Adapted	A	2	2	10560	12190	12310	12900	11990	1002.563381
C6/36	C6/36	Adapted	A	3	2	14240	14980	15780	16750	15437.5	1077.539636
C6/36	C6/36	Adapted	A	4	2	11000	11820	14040	13790	12662.5	1488.004816
C6/36	C6/36	Adapted	A	5	2	20940	20510	22770	23510	21932.5	1437.413766
C6/36	C6/36	Adapted	A	6	2	16300	18810	20770	20670	19137.5	2095.413643
C6/36	C6/36	Adapted	A	7	2	17020	16030	19360	19020	17857.5	1596.87977
C6/36	C6/36	Adapted	A	8	2	17790	17170	17030	20410	18100	1575.013227
C6/36	C6/36	Adapted	A	9	2	11880	12800	12550	10820	12012.5	884.811656
C6/36	C6/36	Adapted	B	1	2	9301	9332	8492	8121	8811.5	602.6057307
C6/36	C6/36	Adapted	B	2	2	11930	12010	11850	10420	11552.5	757.8203393
C6/36	C6/36	Adapted	B	3	2	15700	15160	15020	12040	14480	1652.876281
C6/36	C6/36	Adapted	B	4	2	14730	14180	12690	11220	13205	1579.208663
C6/36	C6/36	Adapted	B	5	2	23280	22600	22570	21660	22527.5	664.7994685
C6/36	C6/36	Adapted	B	6	2	21490	18560	18900	18610	19390	1408.000947
C6/36	C6/36	Adapted	B	7	2	21700	20750	21830	17460	20435	2040.922994
C6/36	C6/36	Adapted	B	8	2	19060	18580	18530	17340	18377.5	731.7729611
C6/36	C6/36	Adapted	B	9	2	18680	17690	17090	17720	17795	657.4952471
Huh7	Huh7	Adapted	B	1	3	600.9	545.5	727.6	640.1	628.525	76.60750072
Huh7	Huh7	Adapted	B	2	3	2270	2449	2029	2178	2231.5	175.7431838
Huh7	Huh7	Adapted	B	3	3	2300	2385	2214	1949	2212	188.7202515
Huh7	Huh7	Adapted	B	4	3	2665	2792	2523	2292	2568	214.3097447
Huh7	Huh7	Adapted	B	5	3	3923	3627	3574	2890	3503.5	436.8771757
Huh7	Huh7	Adapted	B	6	3	4407	4619	4333	4129	4372	202.3231738
Huh7	Huh7	Adapted	B	7	3	7261	6939	6389	5936	6631.25	586.8994093
Huh7	Huh7	Adapted	B	8	3	5004	4891	4828	4136	4714.75	392.6434982
Huh7	Huh7	Adapted	B	9	3	4610	5694	4840	4545	4922.25	529.8366887
