# Supplementary material for: Principles of dengue virus evolvability derived from genotype-fitness maps in human and mosquito cells
Source: eLife journal article supplement (doi:10.7554/elife.61921), 2021-01-25
Supplement: supp [file elife-61921-supp-v1.zip › elife_poa_e61921_Figure_1_source_data_2.txt]

CellLine	P1	P2	P3	P4	P5	P6	P7	P8	P9	Population	Rep
Huh7	21000	80000	30000	300000	1400000	1900000	2900000	8000000	10000000	Huh A	1
C6/36	35000	50000	4000	190000	310000	700000	370000	700000	900000	Huh A	1
HepG2	50000	160000	15000	290000	400000	580000	1000000	2600000	3300000	Huh A	1
Vero	70000	160000	31000	700000	1000000	600000	2000000	4700000	5100000	Huh A	1
Hu751	90000	600000	40000	700000	2200000	1400000	2400000	10000000	15000000	Huh A	1
Huh7	80000	1700000	2800000	1800000	5300000	1500000	8000000	5000000	7000000	Huh B	1
C6/36	15000	120000	270000	300000	1000000	170000	600000	600000	700000	Huh B	1
HepG2	41000	210000	540000	540000	2600000	500000	2800000	2000000	1200000	Huh B	1
Vero	90000	590000	700000	1400000	6700000	2400000	6400000	4500000	3300000	Huh B	1
Hu751	40000	640000	1900000	1200000	5900000	2000000	5000000	6000000	4000000	Huh B	1
Huh7	51000000	67000000	66000000	54000000	96000000	59000000	101000000	140000000	66000000	C6/36 A	1
C6/36	39000000	64000000	55000000	61000000	130000000	210000000	360000000	370000000	110000000	C6/36 A	1
HepG2	22000000	30000000	22000000	14000000	30000000	18000000	10000000	24000000	14000000	C6/36 A	1
Vero	3700000	6300000	7400000	24000000	46000000	20000000	50000000	90000000	45000000	C6/36 A	1
Hu751	47000000	71000000	72000000	88000000	83000000	75000000	101000000	112000000	77000000	C6/36 A	1
Huh7	22000000	27000000	42000000	36000000	27000000	22000000	32000000	25000000	40000000	C6/36 B	1
C6/36	20000000	30000000	48000000	60000000	70000000	110000000	120000000	140000000	180000000	C6/36 B	1
HepG2	10400000	8000000	8800000	11000000	5800000	9000000	7800000	7800000	10800000	C6/36 B	1
Vero	2700000	1800000	2000000	2300000	4600000	4400000	5300000	4000000	4200000	C6/36 B	1
Hu751	20000000	40000000	57000000	53000000	42000000	32000000	47000000	34000000	66000000	C6/36 B	1
Huh7	70000	420000	37000	50000	1100000	1000000	2100000	5000000	5900000	Huh A	2
C6/36	30000	150000	10000	190000	310000	150000	400000	1300000	1010000	Huh A	2
HepG2	14000	90000	12000	300000	280000	210000	500000	800000	4600000	Huh A	2
Vero	100000	460000	80000	720000	1000000	1000000	1800000	2900000	3400000	Huh A	2
Hu751										Huh A	2
Huh7	40000	200000	340000	700000	2400000	480000	1900000	700000	5000000	Huh B	2
C6/36	31000	110000	210000	100000	1100000	300000	900000	500000	1000000	Huh B	2
HepG2	19000	240000	310000	440000	1500000	1100000	2800000	3800000	5000000	Huh B	2
Vero	14000	250000	440000	640000	2600000	1200000	2300000	2600000	6000000	Huh B	2
Hu751										Huh B	2
Huh7	8000000	15000000	600000	4100000	7200000	6000000	6700000	5500000	3300000	C6/36 A	2
C6/36	7000000	8000000	13000000	21000000	23000000	21000000	36000000	37000000	110000000	C6/36 A	2
HepG2	11000000	8000000	3600000	2900000	5400000	2700000	2900000	2400000	3300000	C6/36 A	2
Vero	5000000	4600000	2600000	1700000	5100000	5400000	5500000	6400000	8000000	C6/36 A	2
Hu751										C6/36 A	2
Huh7	4200000	8000000	13000000	7200000	12000000	13000000	15000000	12000000	10000000	C6/36 B	2
C6/36	8000000	8000000	21000000	33000000	49000000	90000000	80000000	90000000	80000000	C6/36 B	2
HepG2	13000000	14000000	6000000	6100000	7000000	6300000	9000000	16000000	3800000	C6/36 B	2
Vero	2500000	2000000	2500000	3400000	4700000	4800000	6400000	6600000	5000000	C6/36 B	2
Hu751										C6/36 B	2
Huh7	250000	1000000	260000	600000	800000	1100000	2100000	5200000	6000000	Huh A	3
C6/36	150000	360000	80000	430000	410000	310000	500000	1100000	1400000	Huh A	3
HepG2	120000	240000	29000	270000	380000	530000	1100000	1500000	3600000	Huh A	3
Vero	360000	600000	160000	500000	1400000	750000	2600000	4200000	4400000	Huh A	3
Hu751										Huh A	3
Huh7	29000	150000	290000	500000	1100000	400000	1000000	500000	800000	Huh B	3
C6/36	17000	140000	170000	200000	230000	260000	400000	700000	1100000	Huh B	3
HepG2	29000	71000	200000	330000	320000	330000	550000	700000	800000	Huh B	3
Vero	30000	140000	360000	670000	570000	590000	1900000	1100000	2900000	Huh B	3
Hu751										Huh B	3
Huh7	6000000	5100000	4000000	4100000	1000000	900000	800000	600000	700000	C6/36 A	3
C6/36	12000000	8000000	6000000	17000000	30000000	22000000	32000000	50000000	60000000	C6/36 A	3
HepG2	2500000	2900000	3300000	3200000	3800000	3300000	3000000	4000000	4900000	C6/36 A	3
Vero	1600000	3600000	2200000	3400000	7700000	6100000	9000000	11300000	9200000	C6/36 A	3
Hu751										C6/36 A	3
Huh7	3600000	4600000	4000000	3900000	5900000	4400000	4700000	5000000	5700000	C6/36 B	3
C6/36	11000000	10000000	11000000	8000000	21000000	21000000	30000000	49000000	62000000	C6/36 B	3
HepG2	26000000	15000000	23000000	41000000	42000000	29000000	18000000	10000000	30000000	C6/36 B	3
Vero	1600000	800000	1400000	1400000	2500000	2900000	3700000	3000000	3300000	C6/36 B	3
Hu751										C6/36 B	3
Huh7	341000	1500000	327000	950000	3300000	4000000	7100000	18200000	21900000	Huh A	4
C6/36	215000	560000	94000	810000	1030000	1160000	1270000	3100000	3310000	Huh A	4
HepG2	184000	490000	56000	860000	1060000	1320000	2600000	4900000	11500000	Huh A	4
Vero	530000	1220000	271000	1920000	3400000	2350000	6400000	11800000	12900000	Huh A	4
Hu751	90000	600000	40000	700000	2200000	1400000	2400000	10000000	15000000	Huh A	4
Huh7	149000	2050000	3430000	3000000	8800000	2380000	10900000	6200000	12800000	Huh B	4
C6/36	63000	370000	650000	600000	2330000	730000	1900000	1800000	2800000	Huh B	4
HepG2	89000	521000	1050000	1310000	4420000	1930000	6150000	6500000	7000000	Huh B	4
Vero	134000	980000	1500000	2710000	9870000	4190000	10600000	8200000	12200000	Huh B	4
Hu751	40000	640000	1900000	1200000	5900000	2000000	5000000	6000000	4000000	Huh B	4
Huh7	65000000	87100000	70600000	62200000	104200000	65900000	108500000	146100000	70000000	C6/36 A	4
C6/36	58000000	80000000	74000000	99000000	183000000	253000000	428000000	457000000	280000000	C6/36 A	4
HepG2	35500000	40900000	28900000	20100000	39200000	24000000	15900000	30400000	22200000	C6/36 A	4
Vero	10300000	14500000	12200000	29100000	58800000	31500000	64500000	107700000	62200000	C6/36 A	4
Hu751	47000000	71000000	72000000	88000000	83000000	75000000	101000000	112000000	77000000	C6/36 A	4
Huh7	29800000	39600000	59000000	47100000	44900000	39400000	51700000	42000000	55700000	C6/36 B	4
C6/36	39000000	48000000	80000000	101000000	140000000	221000000	230000000	279000000	322000000	C6/36 B	4
HepG2	49400000	37000000	37800000	58100000	54800000	44300000	34800000	33800000	44600000	C6/36 B	4
Vero	6800000	4600000	5900000	7100000	11800000	12100000	15400000	13600000	12500000	C6/36 B	4
Hu751	20000000	40000000	57000000	53000000	42000000	32000000	47000000	34000000	66000000	C6/36 B	4
