# Supplementary material for: Principles of dengue virus evolvability derived from genotype-fitness maps in human and mosquito cells
Source: eLife journal article supplement (doi:10.7554/elife.61921), 2021-01-25
Supplement: supp [file elife-61921-supp-v1.zip › elife_poa_e61921_Figure_6_source_data_1.xlsx]

## Sheet: fisher
	polyprotein_nonsyn
B	534	non_B	36821
N	21222	non_N	16133
D	6273	non_D	31082
L	9326	non_L	28029
total	37355		0
	specific regions to compare with (Fisher exact, one sided):
	TM			P-value			Zika-conserved			P-value			Dengue-conserved			P-value
B	81	non_B	6662	0.07654		B	226	non_B	20334	0.0004116		B	247	non_B	21176	0.002511
N	3544	non_N	3199	5.509e-11		N	10845	non_N	9715	2.2e-16		N	11086	non_N	10337	2.2e-16
D	1023	non_D	5720	0.0004689		D	3570	non_D	16990	0.04117		D	3789	non_D	17634	0.002956
L	2095	non_L	4648	2.2e-16		L	5919	non_L	14641	2.2e-16		L	6301	non_L	15122	2.2e-16
total	6743		0			total	20560		0			total	21423		0
	non-TM						Zika-similar						Dengue-similar
B	453	non_B	30159	0.3037		B	114	non_B	6501	0.04023		B	119	non_B	7439	0.1815
N	17678	non_N	12934	0.007166		N	4104	non_N	2511	9.086e-16		N	4729	non_N	2829	2.2e-16
D	5250	non_D	25362	0.1104		D	991	non_D	5624	0.0001187		D	1121	non_D	6437	1.226e-05
L	7231	non_L	23381	2.496e-05		L	1406	non_L	5209	3.022e-11		L	1589	non_L	5969	8.82e-14
total	30612		0			total	6615		0			total	7558		0
	disordered						Zika-dissimilar						Dengue-remote
B	119	non_B	6080	0.002557		B	194	non_B	9986	0.0004154		B	35	non_B	1919	0.1156
N	3647	non_N	2552	0.001506		N	6273	non_N	3907	2.2e-16		N	1295	non_N	659	2.2e-16
D	1190	non_D	5009	2.347e-06		D	1712	non_D	8468	0.482		D	294	non_D	1660	0.02242
L	1243	non_L	4956	2.2e-16		L	2001	non_L	8179	2.2e-16		L	330	non_L	1624	2.2e-16
total	6199		0			total	10180		0			total	1954		0
	ordered						motifs (anchor)						Dengue-dissimilar
B	415	non_B	30741	0.1458		B	223	non_B	12913	0.01735		B	133	non_B	6287	0.000118
N	17575	non_N	13581	0.147		N	7603	non_N	5533	0.01714		N	4112	non_N	2308	2.2e-16
D	5083	non_D	26073	0.04782		D	2409	non_D	10727	3.102e-05		D	1069	non_D	5351	0.3973
L	8083	non_L	23073	2.2e-16		L	2901	non_L	10235	1.337e-11		L	1106	non_L	5314	2.2e-16
total	31156		0			total	13136		0			total	6420		0
