# Supplementary material for: Principles of dengue virus evolvability derived from genotype-fitness maps in human and mosquito cells
Source: eLife journal article supplement (doi:10.7554/elife.61921), 2021-01-25
Supplement: supp [file elife-61921-supp-v1.zip › elife_poa_e61921_Figure_6_source_data_2.csv]

	pos	wtRes	mutRes	num	reference	mut	wtcodon	mutcodon	muttype	ID	subs.type	zeros	binomial	M	L	wrel	wrel.ciLower	wrel.ciUpper	host	set	murate	muSEM	passage	freq	index	subTypes	reg	status	HC	iupred	anchor	TM
3156	1	M	I	99	G	C	ATG	ATC	NonSyn	G99C	GC	2	7	0	8	0	0	0	Human	A	3.700457e-06	2.674076e-07	MF.9	2.86613e-06	1036661	C	C	L	HC	0.9106	0.5998	0
3157	1	M	I	99	G	T	ATG	ATT	NonSyn	G99T	GT	9	3	8	0	0.7307394	0.2639924	1.19525	Human	A	5.90433e-06	1.997031e-07	MF.9	2.722824e-05	1053180	C	C	N	HC	0.9106	0.5998	0
3158	1	M	I	99	G	A	ATG	ATA	NonSyn	G99A	GA	9	3	8	0	1.381023	0.7698753	1.898244	Human	B	7.684204e-06	4.645403e-07	MF.9	0.0001453836	1061647	C	C	N	HC	0.9106	0.5998	0
3159	1	M	I	99	G	C	ATG	ATC	NonSyn	G99C	GC	1	8	0	8	0	0	0	Human	B	4.230269e-06	2.592937e-07	MF.9	0	1068830	C	C	L	HC	0.9106	0.5998	0
3160	1	M	I	99	G	T	ATG	ATT	NonSyn	G99T	GT	8	6	8	0	2.030436	1.230658	2.951599	Human	B	7.052585e-06	4.58263e-07	MF.9	8.551979e-06	1085349	C	C	B	HC	0.9106	0.5998	0
3161	1	M	I	99	G	C	ATG	ATC	NonSyn	G99C	GC	4	5	0	8	0	0	0	Mosquito	A	1.263716e-05	7.038203e-07	MF.9	1.38859e-05	1100999	C	C	L	HC	0.9106	0.5998	0
3162	1	M	I	99	G	T	ATG	ATT	NonSyn	G99T	GT	4	5	1	7	0	0	0	Mosquito	A	2.290083e-05	1.366303e-06	MF.9	2.082885e-05	1117518	C	C	L	HC	0.9106	0.5998	0
3163	1	M	I	99	G	A	ATG	ATA	NonSyn	G99A	GA	9	1	8	0	0.6095734	0.04782635	1.17132	Mosquito	B	6.112924e-06	3.730988e-07	MF.9	1.897911e-05	1125985	C	C	N	HC	0.9106	0.5998	0
3164	1	M	I	99	G	C	ATG	ATC	NonSyn	G99C	GC	3	6	1	7	0	0	0	Mosquito	B	3.432927e-06	9.570197e-07	MF.9	2.10879e-06	1133168	C	C	L	HC	0.9106	0.5998	0
3165	1	M	I	99	G	T	ATG	ATT	NonSyn	G99T	GT	9	3	8	0	1.00277	0.3757308	1.609828	Mosquito	B	7.493022e-06	1.393832e-06	MF.9	2.530548e-05	1149687	C	C	N	HC	0.9106	0.5998	0
3166	1	M	K	98	T	A	ATG	AAG	NonSyn	T98A	TA	2	7	1	7	0	0	0	Mosquito	A	7.166782e-06	3.393327e-07	MF.9	1.429409e-05	1093815	C	C	L	HC	0.9106	0.5998	0
3167	1	M	L	97	A	C	ATG	CTG	NonSyn	A97C	AC	0	9	0	8	0	0	0	Human	A	2.326514e-06	2.040447e-07	MF.9	0	1036659	C	C	L	HC	0.9106	0.5998	0
3168	1	M	L	97	A	C	ATG	CTG	NonSyn	A97C	AC	1	8	1	7	0	0	0	Human	B	2.288044e-06	1.737362e-07	MF.9	0	1068828	C	C	L	HC	0.9106	0.5998	0
3169	1	M	L	97	A	C	ATG	CTG	NonSyn	A97C	AC	1	8	1	7	0.1476219	0	0.3690548	Mosquito	B	2.391816e-06	1.394774e-07	MF.9	0	1133166	C	C	D	HC	0.9106	0.5998	0
3170	1	M	R	98	T	G	ATG	AGG	NonSyn	T98G	TG	1	8	1	7	0	0	0.2705359	Human	A	1.799189e-06	1.556942e-07	MF.9	0	1045176	C	C	D	HC	0.9106	0.5998	0
3171	1	M	R	98	T	G	ATG	AGG	NonSyn	T98G	TG	2	7	1	7	0	0	0	Human	B	1.80746e-06	1.143024e-07	MF.9	8.63804e-06	1077345	C	C	L	HC	0.9106	0.5998	0
3172	1	M	R	98	T	G	ATG	AGG	NonSyn	T98G	TG	2	7	1	7	0	0	0	Mosquito	B	2.030327e-06	1.119074e-07	MF.9	1.071174e-06	1141683	C	C	L	HC	0.9106	0.5998	0
3173	1	M	T	98	T	C	ATG	ACG	NonSyn	T98C	TC	9	5	8	0	0.6948932	0.4979087	2.100287	Human	B	8.638697e-06	3.744363e-07	MF.9	0.0001036565	1068829	C	C	N	HC	0.9106	0.5998	0
3174	2	N	D	100	A	G	AAT	GAT	NonSyn	A100G	AG	9	6	8	0	0.7248826	0.3792288	0.9586605	Human	A	1.14325e-05	8.091075e-07	MF.9	0.0002006323	1045177	C	C	D	HC	0.9346	0.5772	0
3175	2	N	D	100	A	G	AAT	GAT	NonSyn	A100G	AG	9	6	8	0	0.9792754	0.3050633	1.48032	Human	B	1.213945e-05	3.148199e-07	MF.9	0.0001153821	1077346	C	C	N	HC	0.9346	0.5772	0
3176	2	N	H	100	A	C	AAT	CAT	NonSyn	A100C	AC	1	8	1	7	0	0	3.133567	Human	B	2.288044e-06	1.737362e-07	MF.9	0	1068831	C	C	N	HC	0.9346	0.5772	0
3177	2	N	H	100	A	C	AAT	CAT	NonSyn	A100C	AC	1	8	1	7	0	0	0	Mosquito	A	3.286083e-06	1.701643e-07	MF.9	6.755342e-06	1101000	C	C	L	HC	0.9346	0.5772	0
3178	2	N	H	100	A	C	AAT	CAT	NonSyn	A100C	AC	1	8	1	7	0	0	0.4863589	Mosquito	B	2.391816e-06	1.394774e-07	MF.9	0	1133169	C	C	D	HC	0.9346	0.5772	0
3179	2	N	I	101	A	T	AAT	ATT	NonSyn	A101T	AT	1	8	1	7	0	0	0	Mosquito	A	2.875636e-06	1.187371e-07	MF.9	0	1117520	C	C	L	HC	0.9346	0.5772	0
3180	2	N	K	102	T	A	AAT	AAA	NonSyn	T102A	TA	0	9	0	8	0	0	0	Mosquito	A	7.166782e-06	3.393327e-07	MF.9	0	1093817	C	C	L	HC	0.9346	0.5772	0
3181	2	N	N	102	T	C	AAT	AAC	Syn	T102C	TC	9	8	8	0	1.070765	0.8440526	1.439129	Human	A	8.304354e-06	4.831455e-07	MF.9	0.0002189814	1036664	S	C	N	HC	0.9346	0.5772	0
3182	2	N	N	102	T	C	AAT	AAC	Syn	T102C	TC	9	9	8	0	1.193447	0.9439281	1.361356	Human	B	8.638697e-06	3.744363e-07	MF.9	0.0001973425	1068833	S	C	N	HC	0.9346	0.5772	0
3183	2	N	N	102	T	C	AAT	AAC	Syn	T102C	TC	9	6	8	0	1.354178	0.6202654	2.088091	Mosquito	A	1.724887e-05	1.124953e-06	MF.9	0.0002266168	1101002	S	C	N	HC	0.9346	0.5772	0
3184	2	N	N	102	T	C	AAT	AAC	Syn	T102C	TC	9	9	8	0	0.9458686	0.8764792	1.258227	Mosquito	B	8.756502e-06	5.645669e-07	MF.9	0.0001665876	1133171	S	C	N	HC	0.9346	0.5772	0
3185	2	N	S	101	A	G	AAT	AGT	NonSyn	A101G	AG	9	5	8	0	1.256705	0.5276448	1.985766	Human	B	1.213945e-05	3.148199e-07	MF.9	4.878287e-05	1077347	C	C	N	HC	0.9346	0.5772	0
3186	2	N	Y	100	A	T	AAT	TAT	NonSyn	A100T	AT	1	8	1	7	0	0	0	Mosquito	A	2.875636e-06	1.187371e-07	MF.9	6.755342e-06	1117519	C	C	L	HC	0.9346	0.5772	0
3187	3	N	D	103	A	G	AAC	GAC	NonSyn	A103G	AG	9	0	8	0	1.021227	0.382661	1.856747	Mosquito	A	1.210803e-05	6.184859e-07	MF.9	4.551691e-05	1109518	C	C	N	HC	0.7799	0.5630	0
3188	3	N	H	103	A	C	AAC	CAC	NonSyn	A103C	AC	1	8	0	8	0	0	0	Human	A	2.326514e-06	2.040447e-07	MF.9	0	1036665	C	C	L	HC	0.7799	0.5630	0
3189	3	N	H	103	A	C	AAC	CAC	NonSyn	A103C	AC	0	9	0	8	0	0	0	Mosquito	A	3.286083e-06	1.701643e-07	MF.9	0	1101003	C	C	L	HC	0.7799	0.5630	0
3190	3	N	I	104	A	T	AAC	ATC	NonSyn	A104T	AT	1	8	1	7	0	0	0.5852296	Human	A	2.37871e-06	1.833534e-07	MF.9	0	1053184	C	C	D	HC	0.7799	0.5630	0
3191	3	N	I	104	A	T	AAC	ATC	NonSyn	A104T	AT	1	8	1	7	0.6450031	0	1.612508	Human	B	2.589251e-06	1.43343e-07	MF.9	0	1085353	C	C	N	HC	0.7799	0.5630	0
3192	3	N	I	104	A	T	AAC	ATC	NonSyn	A104T	AT	1	8	0	8	0	0	0	Mosquito	A	2.875636e-06	1.187371e-07	MF.9	0	1117522	C	C	L	HC	0.7799	0.5630	0
3193	3	N	I	104	A	T	AAC	ATC	NonSyn	A104T	AT	2	7	0	8	0	0	0	Mosquito	B	2.369747e-06	1.784832e-07	MF.9	3.136845e-06	1149691	C	C	L	HC	0.7799	0.5630	0
3194	3	N	K	105	C	A	AAC	AAA	NonSyn	C105A	CA	3	6	1	7	0	0	0	Human	A	2.985888e-06	1.847504e-07	MF.9	1.375949e-06	1029480	C	C	L	HC	0.7799	0.5630	0
3195	3	N	K	105	C	G	AAC	AAG	NonSyn	C105G	CG	1	8	1	7	0	0	0.5671592	Human	A	1.604509e-06	2.564144e-07	MF.9	0	1045182	C	C	D	HC	0.7799	0.5630	0
3196	3	N	K	105	C	A	AAC	AAA	NonSyn	C105A	CA	2	7	1	7	0	0	0	Human	B	3.57888e-06	4.588673e-07	MF.9	0	1061649	C	C	L	HC	0.7799	0.5630	0
3197	3	N	K	105	C	G	AAC	AAG	NonSyn	C105G	CG	1	8	1	7	0	0	0	Human	B	1.455268e-06	7.022105e-08	MF.9	8.249328e-06	1077351	C	C	L	HC	0.7799	0.5630	0
3198	3	N	K	105	C	G	AAC	AAG	NonSyn	C105G	CG	0	9	0	8	0	0	0	Mosquito	A	2.20927e-06	9.740866e-08	MF.9	0	1109520	C	C	L	HC	0.7799	0.5630	0
3199	3	N	K	105	C	G	AAC	AAG	NonSyn	C105G	CG	1	8	1	7	0	0	0	Mosquito	B	1.513275e-06	1.225367e-07	MF.9	0	1141689	C	C	L	HC	0.7799	0.5630	0
3200	3	N	N	105	C	T	AAC	AAT	Syn	C105T	CT	9	3	1	7	0	0	0.4135626	Mosquito	A	0.0001578562	6.997471e-06	MF.9	9.931078e-05	1117523	S	C	D	HC	0.7799	0.5630	0
3201	3	N	T	104	A	C	AAC	ACC	NonSyn	A104C	AC	1	8	1	7	0	0	1.10036	Mosquito	A	3.286083e-06	1.701643e-07	MF.9	0	1101004	C	C	N	HC	0.7799	0.5630	0
3202	3	N	T	104	A	C	AAC	ACC	NonSyn	A104C	AC	2	7	1	7	0.3608722	0	0.9021805	Mosquito	B	2.391816e-06	1.394774e-07	MF.9	0	1133173	C	C	D	HC	0.7799	0.5630	0
3203	4	Q	H	108	A	C	CAA	CAC	NonSyn	A108C	AC	0	9	0	8	0	0	0	Human	B	2.288044e-06	1.737362e-07	MF.9	0	1068837	C	C	L	HC	0.8050	0.5512	0
3204	4	Q	H	108	A	T	CAA	CAT	NonSyn	A108T	AT	9	3	8	0	0.7351763	0.4462864	1.351722	Human	B	2.589251e-06	1.43343e-07	MF.9	7.972956e-06	1085357	C	C	N	HC	0.8050	0.5512	0
3205	4	Q	H	108	A	T	CAA	CAT	NonSyn	A108T	AT	1	8	1	7	0	0	0	Mosquito	A	2.875636e-06	1.187371e-07	MF.9	0	1117526	C	C	L	HC	0.8050	0.5512	0
3206	4	Q	K	106	C	A	CAA	AAA	NonSyn	C106A	CA	2	7	1	7	0.6773961	0	1.69349	Mosquito	A	6.508077e-06	1.996644e-07	MF.9	6.53488e-06	1093819	C	C	N	HC	0.8050	0.5512	0
3207	4	Q	K	106	C	A	CAA	AAA	NonSyn	C106A	CA	2	7	0	8	0	0	0	Mosquito	B	4.124727e-06	2.499298e-07	MF.9	3.050873e-06	1125988	C	C	L	HC	0.8050	0.5512	0
3208	4	Q	L	107	A	T	CAA	CTA	NonSyn	A107T	AT	1	8	1	7	0	0	1.23063	Mosquito	A	2.875636e-06	1.187371e-07	MF.9	0	1117525	C	C	N	HC	0.8050	0.5512	0
3209	4	Q	P	107	A	C	CAA	CCA	NonSyn	A107C	AC	1	8	1	7	0	0	0	Human	A	2.326514e-06	2.040447e-07	MF.9	0	1036667	C	C	L	HC	0.8050	0.5512	0
3210	4	Q	P	107	A	C	CAA	CCA	NonSyn	A107C	AC	1	8	1	7	0.3143347	0	0.7858368	Mosquito	A	3.286083e-06	1.701643e-07	MF.9	0	1101005	C	C	D	HC	0.8050	0.5512	0
3211	4	Q	P	107	A	C	CAA	CCA	NonSyn	A107C	AC	1	8	0	8	0	0	0	Mosquito	B	2.391816e-06	1.394774e-07	MF.9	0	1133174	C	C	L	HC	0.8050	0.5512	0
3212	4	Q	Q	108	A	G	CAA	CAG	Syn	A108G	AG	2	7	0	8	0	0	0	Mosquito	A	1.210803e-05	6.184859e-07	MF.9	6.199436e-06	1109523	S	C	L	HC	0.8050	0.5512	0
3213	4	Q	Q	108	A	G	CAA	CAG	Syn	A108G	AG	6	3	1	7	0.2110956	0	0.5277391	Mosquito	B	1.180995e-05	6.889282e-07	MF.9	6.066464e-06	1141692	S	C	D	HC	0.8050	0.5512	0
3214	4	Q	R	107	A	G	CAA	CGA	NonSyn	A107G	AG	9	7	8	0	0.9269112	0.3405023	1.85339	Human	B	1.213945e-05	3.148199e-07	MF.9	8.812267e-05	1077353	C	C	N	HC	0.8050	0.5512	0
3215	4	Q	R	107	A	G	CAA	CGA	NonSyn	A107G	AG	9	5	8	0	0.8161772	0.6289684	0.9909005	Mosquito	B	1.180995e-05	6.889282e-07	MF.9	3.972751e-05	1141691	C	C	D	HC	0.8050	0.5512	0
3216	4	Q	X	106	C	T	CAA	TAA	NonSyn	C106T	CT	9	9	1	7	0	0	0	Mosquito	B	0.0002034795	7.793136e-06	MF.9	0.0002288155	1149693	X	C	L	HC	0.8050	0.5512	0
3217	5	R	L	110	G	T	CGG	CTG	NonSyn	G110T	GT	3	6	1	7	0	0	1.76601	Human	A	5.90433e-06	1.997031e-07	MF.9	0	1053190	C	C	N	HC	0.7459	0.5457	0
3218	5	R	P	110	G	C	CGG	CCG	NonSyn	G110C	GC	9	2	8	0	1.855653	0.2545417	2.74295	Human	B	4.230269e-06	2.592937e-07	MF.9	2.603624e-05	1068838	C	C	N	HC	0.7459	0.5457	0
3219	5	R	R	109	C	A	CGG	AGG	Syn	C109A	CA	2	7	0	8	0	0	0	Human	A	2.985888e-06	1.847504e-07	MF.9	2.710347e-06	1029482	S	C	L	HC	0.7459	0.5457	0
3220	5	R	R	111	G	A	CGG	CGA	Syn	G111A	GA	9	9	8	0	0.6708928	0.5279391	1.477917	Human	A	6.69739e-06	4.668841e-07	MF.9	0.0002546823	1029484	S	C	N	HC	0.7459	0.5457	0
3221	5	R	R	111	G	T	CGG	CGT	Syn	G111T	GT	1	8	0	8	0	0	0	Human	A	5.90433e-06	1.997031e-07	MF.9	0	1053191	S	C	L	HC	0.7459	0.5457	0
3222	5	R	R	109	C	A	CGG	AGG	Syn	C109A	CA	1	8	0	8	0	0	0	Human	B	3.57888e-06	4.588673e-07	MF.9	0	1061651	S	C	L	HC	0.7459	0.5457	0
3223	5	R	R	111	G	A	CGG	CGA	Syn	G111A	GA	9	9	8	0	1.349711	0.6592085	2.17122	Human	B	7.684204e-06	4.645403e-07	MF.9	0.0004545892	1061653	S	C	N	HC	0.7459	0.5457	0
3224	5	R	R	111	G	A	CGG	CGA	Syn	G111A	GA	9	6	8	0	2.34084	0.335662	4.346019	Mosquito	A	8.774931e-06	2.38219e-07	MF.9	0.0002856668	1093822	S	C	N	HC	0.7459	0.5457	0
3225	5	R	R	111	G	A	CGG	CGA	Syn	G111A	GA	9	9	8	0	1.036431	0.9230951	1.522178	Mosquito	B	6.112924e-06	3.730988e-07	MF.9	0.0001916362	1125991	S	C	N	HC	0.7459	0.5457	0
3226	6	K	E	112	A	G	AAA	GAA	NonSyn	A112G	AG	9	9	8	0	1.297329	1.085383	1.573457	Human	A	1.14325e-05	8.091075e-07	MF.9	0.0008605417	1045187	C	C	B	HC	0.5951	0.5371	0
3227	6	K	E	112	A	G	AAA	GAA	NonSyn	A112G	AG	9	9	8	0	0.989736	0.7089748	1.42762	Human	B	1.213945e-05	3.148199e-07	MF.9	0.0002898215	1077356	C	C	N	HC	0.5951	0.5371	0
3228	6	K	E	112	A	G	AAA	GAA	NonSyn	A112G	AG	9	9	8	0	0.9647486	0.7982086	1.216004	Mosquito	A	1.210803e-05	6.184859e-07	MF.9	0.0002298278	1109525	C	C	N	HC	0.5951	0.5371	0
3229	6	K	E	112	A	G	AAA	GAA	NonSyn	A112G	AG	9	9	8	0	0.9495912	0.8050983	1.215671	Mosquito	B	1.180995e-05	6.889282e-07	MF.9	0.0002426595	1141694	C	C	N	HC	0.5951	0.5371	0
3230	6	K	I	113	A	T	AAA	ATA	NonSyn	A113T	AT	9	2	8	0	1.521747	0.4548986	3.339351	Mosquito	B	2.369747e-06	1.784832e-07	MF.9	2.110112e-05	1149700	NC	C	N	HC	0.5951	0.5371	0
3231	6	K	K	114	A	G	AAA	AAG	Syn	A114G	AG	9	2	8	0	1.04942	0.8130872	1.360944	Mosquito	A	1.210803e-05	6.184859e-07	MF.9	1.942917e-05	1109527	S	C	N	HC	0.5951	0.5371	0
3232	6	K	N	114	A	C	AAA	AAC	NonSyn	A114C	AC	2	7	1	7	0.2044918	0	0.5112296	Human	A	2.326514e-06	2.040447e-07	MF.9	0	1036673	C	C	D	HC	0.5951	0.5371	0
3233	6	K	N	114	A	C	AAA	AAC	NonSyn	A114C	AC	2	7	1	7	0	0	0	Mosquito	A	3.286083e-06	1.701643e-07	MF.9	0	1101011	C	C	L	HC	0.5951	0.5371	0
3234	6	K	Q	112	A	C	AAA	CAA	NonSyn	A112C	AC	9	3	8	0	0.8661684	0.51571	1.236445	Mosquito	B	2.391816e-06	1.394774e-07	MF.9	1.308952e-05	1133178	C	C	N	HC	0.5951	0.5371	0
3235	6	K	R	113	A	G	AAA	AGA	NonSyn	A113G	AG	6	3	1	7	0	0	0	Human	B	1.213945e-05	3.148199e-07	MF.9	8.448087e-06	1077357	C	C	L	HC	0.5951	0.5371	0
3236	6	K	R	113	A	G	AAA	AGA	NonSyn	A113G	AG	1	8	0	8	0	0	0	Mosquito	A	1.210803e-05	6.184859e-07	MF.9	0	1109526	C	C	L	HC	0.5951	0.5371	0
3237	6	K	R	113	A	G	AAA	AGA	NonSyn	A113G	AG	5	4	1	7	0	0	0.1314211	Mosquito	B	1.180995e-05	6.889282e-07	MF.9	2.00963e-06	1141695	C	C	D	HC	0.5951	0.5371	0
3238	6	K	T	113	A	C	AAA	ACA	NonSyn	A113C	AC	9	3	8	0	2.045235	0.3873902	3.263939	Human	B	2.288044e-06	1.737362e-07	MF.9	0.000101377	1068841	C	C	N	HC	0.5951	0.5371	0
3239	6	K	T	113	A	C	AAA	ACA	NonSyn	A113C	AC	9	1	8	0	0.8457746	0.6034611	1.109678	Mosquito	B	2.391816e-06	1.394774e-07	MF.9	1.105297e-05	1133179	C	C	N	HC	0.5951	0.5371	0
3240	6	K	X	112	A	T	AAA	TAA	NonSyn	A112T	AT	2	7	1	7	0	0	5.609579	Human	A	2.37871e-06	1.833534e-07	MF.9	0	1053192	X	C	N	HC	0.5951	0.5371	0
3241	6	K	X	112	A	T	AAA	TAA	NonSyn	A112T	AT	0	9	0	8	0	0	0	Mosquito	A	2.875636e-06	1.187371e-07	MF.9	0	1117530	X	C	L	HC	0.5951	0.5371	0
3242	7	K	K	117	G	A	AAG	AAA	Syn	G117A	GA	9	5	8	0	1.147599	0.5236515	1.726776	Human	A	6.69739e-06	4.668841e-07	MF.9	1.76214e-05	1029485	S	C	N	HC	0.6269	0.5258	0
3243	7	K	K	117	G	A	AAG	AAA	Syn	G117A	GA	9	2	8	0	0.9378406	0.11784	1.772694	Mosquito	B	6.112924e-06	3.730988e-07	MF.9	2.316394e-05	1125992	S	C	N	HC	0.6269	0.5258	0
3244	7	K	M	116	A	T	AAG	ATG	NonSyn	A116T	AT	0	9	0	8	0	0	0	Mosquito	A	2.875636e-06	1.187371e-07	MF.9	0	1117534	C	C	L	HC	0.6269	0.5258	0
3245	7	K	N	117	G	T	AAG	AAT	NonSyn	G117T	GT	3	6	1	7	0.5244678	0	1.311169	Human	B	7.052585e-06	4.58263e-07	MF.9	0	1085366	C	C	N	HC	0.6269	0.5258	0
3246	7	K	N	117	G	C	AAG	AAC	NonSyn	G117C	GC	4	5	1	7	0.006889696	0	0.01722424	Mosquito	A	1.263716e-05	7.038203e-07	MF.9	6.884966e-06	1101014	C	C	D	HC	0.6269	0.5258	0
3247	7	K	N	117	G	T	AAG	AAT	NonSyn	G117T	GT	5	4	1	7	0	0	0	Mosquito	B	7.493022e-06	1.393832e-06	MF.9	2.105813e-06	1149704	C	C	L	HC	0.6269	0.5258	0
3248	7	K	R	116	A	G	AAG	AGG	NonSyn	A116G	AG	9	3	8	0	0.4819654	0.2517781	0.6878011	Mosquito	B	1.180995e-05	6.889282e-07	MF.9	1.226719e-05	1141698	C	C	D	HC	0.6269	0.5258	0
3249	7	K	T	116	A	C	AAG	ACG	NonSyn	A116C	AC	0	9	0	8	0	0	0	Human	B	2.288044e-06	1.737362e-07	MF.9	0	1068844	C	C	L	HC	0.6269	0.5258	0
3250	7	K	T	116	A	C	AAG	ACG	NonSyn	A116C	AC	1	8	1	7	1.636901	0	4.092253	Mosquito	A	3.286083e-06	1.701643e-07	MF.9	0	1101013	C	C	N	HC	0.6269	0.5258	0
3251	7	K	T	116	A	C	AAG	ACG	NonSyn	A116C	AC	2	7	1	7	0	0	0.9698686	Mosquito	B	2.391816e-06	1.394774e-07	MF.9	2.044532e-06	1133182	C	C	D	HC	0.6269	0.5258	0
3252	7	K	X	115	A	T	AAG	TAG	NonSyn	A115T	AT	0	9	0	8	0	0	0	Human	B	2.589251e-06	1.43343e-07	MF.9	0	1085364	X	C	L	HC	0.6269	0.5258	0
3253	7	K	X	115	A	T	AAG	TAG	NonSyn	A115T	AT	1	8	1	7	0	0	0	Mosquito	A	2.875636e-06	1.187371e-07	MF.9	6.604671e-06	1117533	X	C	L	HC	0.6269	0.5258	0
3254	7	K	X	115	A	T	AAG	TAG	NonSyn	A115T	AT	3	6	1	7	0.8782227	0	2.195557	Mosquito	B	2.369747e-06	1.784832e-07	MF.9	1.012807e-06	1149702	X	C	N	HC	0.6269	0.5258	0
3255	8	A	A	120	G	A	GCG	GCA	Syn	G120A	GA	9	7	8	0	1.057596	0.5307408	1.715982	Human	A	6.69739e-06	4.668841e-07	MF.9	9.76968e-05	1029488	S	C	N	HC	0.6661	0.5138	0
3256	8	A	A	120	G	C	GCG	GCC	Syn	G120C	GC	9	7	8	0	1.051892	0.5871426	1.516642	Human	A	3.700457e-06	2.674076e-07	MF.9	2.586092e-05	1036678	S	C	N	HC	0.6661	0.5138	0
3257	8	A	A	120	G	A	GCG	GCA	Syn	G120A	GA	9	6	8	0	1.323737	0.5807759	2.228966	Human	B	7.684204e-06	4.645403e-07	MF.9	8.990201e-05	1061657	S	C	N	HC	0.6661	0.5138	0
3258	8	A	A	120	G	C	GCG	GCC	Syn	G120C	GC	9	8	8	0	1.155734	0.7290517	1.278114	Human	B	4.230269e-06	2.592937e-07	MF.9	6.992378e-05	1068847	S	C	N	HC	0.6661	0.5138	0
3259	8	A	A	120	G	A	GCG	GCA	Syn	G120A	GA	9	3	8	0	0.9973206	0.4549017	1.59763	Mosquito	A	8.774931e-06	2.38219e-07	MF.9	6.133422e-05	1093826	S	C	N	HC	0.6661	0.5138	0
3260	8	A	A	120	G	C	GCG	GCC	Syn	G120C	GC	3	6	1	7	0	0	0.937421	Mosquito	A	1.263716e-05	7.038203e-07	MF.9	6.814914e-06	1101016	S	C	D	HC	0.6661	0.5138	0
3261	8	A	A	120	G	T	GCG	GCT	Syn	G120T	GT	4	5	0	8	0	0	0	Mosquito	A	2.290083e-05	1.366303e-06	MF.9	6.814914e-06	1117538	S	C	L	HC	0.6661	0.5138	0
3262	8	A	A	120	G	A	GCG	GCA	Syn	G120A	GA	9	8	8	0	1.018716	0.8743234	1.419303	Mosquito	B	6.112924e-06	3.730988e-07	MF.9	4.532452e-05	1125995	S	C	N	HC	0.6661	0.5138	0
3263	8	A	E	119	C	A	GCG	GAG	NonSyn	C119A	CA	9	5	8	0	1.252972	0.6514491	1.428229	Human	B	3.57888e-06	4.588673e-07	MF.9	0.0002029468	1061656	C	C	N	HC	0.6661	0.5138	0
3264	8	A	G	119	C	G	GCG	GGG	NonSyn	C119G	CG	9	8	8	0	0.9425027	0.5967284	1.373949	Human	A	1.604509e-06	2.564144e-07	MF.9	3.353527e-05	1045192	C	C	N	HC	0.6661	0.5138	0
3265	8	A	G	119	C	G	GCG	GGG	NonSyn	C119G	CG	9	7	8	0	1.882793	0.3340274	3.33912	Human	B	1.455268e-06	7.022105e-08	MF.9	5.07367e-05	1077361	C	C	N	HC	0.6661	0.5138	0
3266	8	A	P	118	G	C	GCG	CCG	NonSyn	G118C	GC	9	4	8	0	1.202936	0.254016	2.156947	Human	A	3.700457e-06	2.674076e-07	MF.9	1.490877e-05	1036677	NC	C	N	HC	0.6661	0.5138	0
3267	8	A	P	118	G	C	GCG	CCG	NonSyn	G118C	GC	9	4	8	0	1.615933	1.002624	1.995701	Human	B	4.230269e-06	2.592937e-07	MF.9	7.273785e-05	1068846	NC	C	B	HC	0.6661	0.5138	0
3268	8	A	S	118	G	T	GCG	TCG	NonSyn	G118T	GT	4	5	1	7	0.3269336	0	0.817334	Human	A	5.90433e-06	1.997031e-07	MF.9	2.981755e-06	1053198	C	C	D	HC	0.6661	0.5138	0
3269	8	A	S	118	G	T	GCG	TCG	NonSyn	G118T	GT	3	6	0	8	0	0	0	Mosquito	A	2.290083e-05	1.366303e-06	MF.9	7.087222e-06	1117536	C	C	L	HC	0.6661	0.5138	0
3270	8	A	S	118	G	T	GCG	TCG	NonSyn	G118T	GT	3	6	0	8	0	0	0	Mosquito	B	7.493022e-06	1.393832e-06	MF.9	1.054644e-06	1149705	C	C	L	HC	0.6661	0.5138	0
3271	8	A	T	118	G	A	GCG	ACG	NonSyn	G118A	GA	6	3	1	7	0	0	0	Mosquito	B	6.112924e-06	3.730988e-07	MF.9	4.218577e-06	1125993	C	C	L	HC	0.6661	0.5138	0
3272	8	A	V	119	C	T	GCG	GTG	NonSyn	C119T	CT	9	8	1	7	0.1142319	0	0.2855797	Human	A	0.0002554735	2.089311e-05	MF.9	0.0002143341	1053199	NC	C	D	HC	0.6661	0.5138	0
3273	8	A	V	119	C	T	GCG	GTG	NonSyn	C119T	CT	9	9	1	7	0	0	0	Mosquito	B	0.0002034795	7.793136e-06	MF.9	0.0001930085	1149706	NC	C	L	HC	0.6661	0.5138	0
3274	9	K	E	121	A	G	AAA	GAA	NonSyn	A121G	AG	9	9	8	0	1.002302	0.7258207	1.278784	Human	A	1.14325e-05	8.091075e-07	MF.9	0.0002229932	1045193	C	C	N	HC	0.6806	0.5005	0
3275	9	K	E	121	A	G	AAA	GAA	NonSyn	A121G	AG	9	9	8	0	1.044758	0.8099049	1.210053	Human	B	1.213945e-05	3.148199e-07	MF.9	0.0002206087	1077362	C	C	N	HC	0.6806	0.5005	0
3276	9	K	E	121	A	G	AAA	GAA	NonSyn	A121G	AG	9	7	8	0	1.557336	0.2894118	2.825261	Mosquito	A	1.210803e-05	6.184859e-07	MF.9	0.0002391854	1109531	C	C	N	HC	0.6806	0.5005	0
3277	9	K	E	121	A	G	AAA	GAA	NonSyn	A121G	AG	9	9	8	0	0.9449409	0.8236185	1.040948	Mosquito	B	1.180995e-05	6.889282e-07	MF.9	0.0001619196	1141700	C	C	N	HC	0.6806	0.5005	0
3278	9	K	I	122	A	T	AAA	ATA	NonSyn	A122T	AT	9	0	8	0	1.077066	0.2562944	1.589258	Mosquito	B	2.369747e-06	1.784832e-07	MF.9	6.236527e-06	1149709	NC	C	N	HC	0.6806	0.5005	0
3279	9	K	K	123	A	G	AAA	AAG	Syn	A123G	AG	8	3	8	0	0.966791	0.3310287	1.352901	Mosquito	A	1.210803e-05	6.184859e-07	MF.9	4.356919e-05	1109533	S	C	N	HC	0.6806	0.5005	0
3280	9	K	K	123	A	G	AAA	AAG	Syn	A123G	AG	9	5	8	0	1.116259	0.3770029	1.855516	Mosquito	B	1.180995e-05	6.889282e-07	MF.9	7.463196e-05	1141702	S	C	N	HC	0.6806	0.5005	0
3281	9	K	N	123	A	T	AAA	AAT	NonSyn	A123T	AT	8	4	8	0	3.000351	0.4385657	5.96449	Human	A	2.37871e-06	1.833534e-07	MF.9	6.017617e-06	1053203	C	C	N	HC	0.6806	0.5005	0
3282	9	K	N	123	A	T	AAA	AAT	NonSyn	A123T	AT	9	2	8	0	3.486877	0.2908736	7.98341	Human	B	2.589251e-06	1.43343e-07	MF.9	2.964749e-05	1085372	C	C	N	HC	0.6806	0.5005	0
3283	9	K	N	123	A	C	AAA	AAC	NonSyn	A123C	AC	1	8	1	7	0	0	0	Mosquito	A	3.286083e-06	1.701643e-07	MF.9	0	1101019	C	C	L	HC	0.6806	0.5005	0
3284	9	K	N	123	A	T	AAA	AAT	NonSyn	A123T	AT	9	3	8	0	1.158642	0.5489254	1.697275	Mosquito	A	2.875636e-06	1.187371e-07	MF.9	7.261531e-05	1117541	C	C	N	HC	0.6806	0.5005	0
3285	9	K	Q	121	A	C	AAA	CAA	NonSyn	A121C	AC	9	6	8	0	0.6547551	0.3637428	1.153499	Human	A	2.326514e-06	2.040447e-07	MF.9	2.787416e-05	1036679	C	C	N	HC	0.6806	0.5005	0
3286	9	K	Q	121	A	C	AAA	CAA	NonSyn	A121C	AC	9	2	8	0	2.284298	0.1913538	4.361804	Human	B	2.288044e-06	1.737362e-07	MF.9	7.673346e-05	1068848	C	C	N	HC	0.6806	0.5005	0
3287	9	K	R	122	A	G	AAA	AGA	NonSyn	A122G	AG	9	9	8	0	0.6737186	0.3422062	1.019706	Human	A	1.14325e-05	8.091075e-07	MF.9	4.74731e-05	1045194	C	C	N	HC	0.6806	0.5005	0
3288	9	K	R	122	A	G	AAA	AGA	NonSyn	A122G	AG	9	9	8	0	0.9632085	0.5070846	1.248445	Human	B	1.213945e-05	3.148199e-07	MF.9	0.0002825877	1077363	C	C	N	HC	0.6806	0.5005	0
3289	9	K	R	122	A	G	AAA	AGA	NonSyn	A122G	AG	9	9	8	0	1.178519	0.5753602	1.812641	Mosquito	B	1.180995e-05	6.889282e-07	MF.9	0.0002203573	1141701	C	C	N	HC	0.6806	0.5005	0
3290	9	K	T	122	A	C	AAA	ACA	NonSyn	A122C	AC	9	1	8	0	1.664642	0.3850271	2.881659	Human	B	2.288044e-06	1.737362e-07	MF.9	1.948881e-05	1068849	C	C	N	HC	0.6806	0.5005	0
3291	9	K	X	121	A	T	AAA	TAA	NonSyn	A121T	AT	1	8	1	7	0	0	1.902953	Human	B	2.589251e-06	1.43343e-07	MF.9	0	1085370	X	C	N	HC	0.6806	0.5005	0
3292	9	K	X	121	A	T	AAA	TAA	NonSyn	A121T	AT	1	8	1	7	0	0	0	Mosquito	A	2.875636e-06	1.187371e-07	MF.9	0	1117539	X	C	L	HC	0.6806	0.5005	0
3293	9	K	X	121	A	T	AAA	TAA	NonSyn	A121T	AT	2	7	1	7	0.4083753	0	0.8167506	Mosquito	B	2.369747e-06	1.784832e-07	MF.9	2.075893e-06	1149708	X	C	D	HC	0.6806	0.5005	0
3294	10	N	D	124	A	G	AAC	GAC	NonSyn	A124G	AG	9	7	8	0	1.206503	0.8033164	1.400396	Human	B	1.213945e-05	3.148199e-07	MF.9	0.0002051745	1077365	C	C	N	HC	0.7080	0.4886	0
3295	10	N	K	126	C	G	AAC	AAG	NonSyn	C126G	CG	0	9	0	8	0	0	0	Mosquito	A	2.20927e-06	9.740866e-08	MF.9	0	1109536	C	C	L	HC	0.7080	0.4886	0
3296	10	N	N	126	C	T	AAC	AAT	Syn	C126T	CT	9	9	8	0	0.622163	0.1318287	0.9386361	Mosquito	A	0.0001578562	6.997471e-06	MF.9	0.0002843616	1117544	S	C	D	HC	0.7080	0.4886	0
3297	10	N	N	126	C	T	AAC	AAT	Syn	C126T	CT	9	9	1	7	0	0	0	Mosquito	B	0.0002034795	7.793136e-06	MF.9	0.0002000687	1149713	S	C	L	HC	0.7080	0.4886	0
3298	10	N	T	125	A	C	AAC	ACC	NonSyn	A125C	AC	9	3	8	0	1.065564	0.165032	1.966096	Human	B	2.288044e-06	1.737362e-07	MF.9	0.0001514188	1068852	C	C	N	HC	0.7080	0.4886	0
3299	10	N	T	125	A	C	AAC	ACC	NonSyn	A125C	AC	9	2	8	0	1.005329	0.6481774	1.394118	Mosquito	B	2.391816e-06	1.394774e-07	MF.9	2.166042e-05	1133190	C	C	N	HC	0.7080	0.4886	0
3300	11	T	A	127	A	G	ACG	GCG	NonSyn	A127G	AG	4	5	1	7	0.1618168	0	0.3236336	Mosquito	B	1.180995e-05	6.889282e-07	MF.9	4.728479e-06	1141706	C	C	D	HC	0.7331	0.4783	0
3301	11	T	K	128	C	A	ACG	AAG	NonSyn	C128A	CA	9	1	8	0	1.305189	0.5478188	2.757427	Human	A	2.985888e-06	1.847504e-07	MF.9	1.270882e-05	1029490	C	C	N	HC	0.7331	0.4783	0
3302	11	T	K	128	C	A	ACG	AAG	NonSyn	C128A	CA	9	1	8	0	1.452154	0.3397549	2.483698	Human	B	3.57888e-06	4.588673e-07	MF.9	0.0001413428	1061659	C	C	N	HC	0.7331	0.4783	0
3303	11	T	K	128	C	A	ACG	AAG	NonSyn	C128A	CA	9	4	8	0	1.206631	0.3388732	2.037636	Mosquito	B	4.124727e-06	2.499298e-07	MF.9	1.82669e-05	1125997	C	C	N	HC	0.7331	0.4783	0
3304	11	T	P	127	A	C	ACG	CCG	NonSyn	A127C	AC	2	7	1	7	0	0	0	Mosquito	A	3.286083e-06	1.701643e-07	MF.9	0	1101022	NC	C	L	HC	0.7331	0.4783	0
3305	11	T	R	128	C	G	ACG	AGG	NonSyn	C128G	CG	2	7	1	7	0	0	0	Mosquito	B	1.513275e-06	1.225367e-07	MF.9	0	1141707	C	C	L	HC	0.7331	0.4783	0
3306	11	T	T	129	G	A	ACG	ACA	Syn	G129A	GA	3	6	0	8	0	0	0	Human	A	6.69739e-06	4.668841e-07	MF.9	1.660104e-06	1029491	S	C	L	HC	0.7331	0.4783	0
3307	11	T	T	129	G	T	ACG	ACT	Syn	G129T	GT	9	3	8	0	0.3372593	0.2849628	1.712392	Mosquito	B	7.493022e-06	1.393832e-06	MF.9	2.837248e-05	1149716	S	C	N	HC	0.7331	0.4783	0
3308	12	P	H	131	C	A	CCT	CAT	NonSyn	C131A	CA	9	4	8	0	1.021561	0.4575771	1.329613	Human	B	3.57888e-06	4.588673e-07	MF.9	6.796117e-05	1061662	C	C	N	HC	0.7881	0.4710	0
3309	12	P	P	132	T	A	CCT	CCA	Syn	T132A	TA	9	5	8	0	1.565996	0.5116411	2.561491	Human	A	3.680327e-06	2.30523e-07	MF.9	1.880696e-05	1029494	S	C	N	HC	0.7881	0.4710	0
3310	12	P	P	132	T	C	CCT	CCC	Syn	T132C	TC	9	4	8	0	1.225158	0.5293965	1.923652	Human	A	8.304354e-06	4.831455e-07	MF.9	7.35181e-05	1036686	S	C	N	HC	0.7881	0.4710	0
3311	12	P	P	132	T	G	CCT	CCG	Syn	T132G	TG	1	8	1	7	1.008318	0	2.520796	Human	B	1.80746e-06	1.143024e-07	MF.9	0	1077372	S	C	N	HC	0.7881	0.4710	0
3312	12	P	R	131	C	G	CCT	CGT	NonSyn	C131G	CG	4	5	1	7	0	0	0	Mosquito	B	1.513275e-06	1.225367e-07	MF.9	1.196098e-06	1141709	C	C	L	HC	0.7881	0.4710	0
3313	12	P	S	130	C	T	CCT	TCT	NonSyn	C130T	CT	9	4	0	8	0	0	0	Mosquito	A	0.0001578562	6.997471e-06	MF.9	0.0001058901	1117548	C	C	L	HC	0.7881	0.4710	0
3314	13	F	F	135	C	T	TTC	TTT	Syn	C135T	CT	9	5	0	8	0	0	0	Human	A	0.0002554735	2.089311e-05	MF.9	9.64836e-05	1053212	S	C	L	HC	0.6755	0.4647	0
3315	13	F	F	135	C	T	TTC	TTT	Syn	C135T	CT	9	3	0	8	0	0	0	Human	B	0.0002635581	1.843403e-05	MF.9	0.0001074856	1085381	S	C	L	HC	0.6755	0.4647	0
3316	13	F	F	135	C	T	TTC	TTT	Syn	C135T	CT	9	3	0	8	0	0	0	Mosquito	A	0.0001578562	6.997471e-06	MF.9	0.0001364966	1117550	S	C	L	HC	0.6755	0.4647	0
3317	13	F	F	135	C	T	TTC	TTT	Syn	C135T	CT	9	7	0	8	0	0	0	Mosquito	B	0.0002034795	7.793136e-06	MF.9	6.731335e-05	1149719	S	C	L	HC	0.6755	0.4647	0
3318	13	F	I	133	T	A	TTC	ATC	NonSyn	T133A	TA	1	8	0	8	0	0	0	Human	B	4.145682e-06	2.689648e-07	MF.9	0	1061664	C	C	L	HC	0.6755	0.4647	0
3319	13	F	I	133	T	A	TTC	ATC	NonSyn	T133A	TA	1	8	1	7	0	0	0.3984309	Mosquito	A	7.166782e-06	3.393327e-07	MF.9	0	1093833	C	C	D	HC	0.6755	0.4647	0
3320	13	F	L	135	C	G	TTC	TTG	NonSyn	C135G	CG	1	8	1	7	0	0	2.604395	Mosquito	A	2.20927e-06	9.740866e-08	MF.9	0	1109544	C	C	N	HC	0.6755	0.4647	0
3321	13	F	L	133	T	C	TTC	CTC	NonSyn	T133C	TC	4	5	0	8	0	0	0	Mosquito	B	8.756502e-06	5.645669e-07	MF.9	7.305189e-06	1133194	C	C	L	HC	0.6755	0.4647	0
3322	13	F	L	135	C	G	TTC	TTG	NonSyn	C135G	CG	1	8	1	7	0.7248469	0	1.812117	Mosquito	B	1.513275e-06	1.225367e-07	MF.9	0	1141713	C	C	N	HC	0.6755	0.4647	0
3323	13	F	V	133	T	G	TTC	GTC	NonSyn	T133G	TG	1	8	1	7	0	0	0.4095726	Human	A	1.799189e-06	1.556942e-07	MF.9	0	1045204	NC	C	D	HC	0.6755	0.4647	0
3324	13	F	V	133	T	G	TTC	GTC	NonSyn	T133G	TG	1	8	1	7	0	0	0	Human	B	1.80746e-06	1.143024e-07	MF.9	0	1077373	NC	C	L	HC	0.6755	0.4647	0
3325	13	F	V	133	T	G	TTC	GTC	NonSyn	T133G	TG	0	9	0	8	0	0	0	Mosquito	A	3.486291e-06	1.611304e-07	MF.9	0	1109542	NC	C	L	HC	0.6755	0.4647	0
3326	13	F	V	133	T	G	TTC	GTC	NonSyn	T133G	TG	2	7	1	7	0	0	0	Mosquito	B	2.030327e-06	1.119074e-07	MF.9	0	1141711	NC	C	L	HC	0.6755	0.4647	0
3327	14	N	D	136	A	G	AAT	GAT	NonSyn	A136G	AG	8	1	1	7	0.04060214	0	0.1015054	Mosquito	B	1.180995e-05	6.889282e-07	MF.9	1.161288e-06	1141714	C	C	D	HC	0.6576	0.4574	0
3328	14	N	H	136	A	C	AAT	CAT	NonSyn	A136C	AC	0	9	0	8	0	0	0	Human	A	2.326514e-06	2.040447e-07	MF.9	0	1036689	C	C	L	HC	0.6576	0.4574	0
3329	14	N	H	136	A	C	AAT	CAT	NonSyn	A136C	AC	1	8	1	7	0.5187608	0	1.296902	Human	B	2.288044e-06	1.737362e-07	MF.9	0	1068858	C	C	N	HC	0.6576	0.4574	0
3330	14	N	H	136	A	C	AAT	CAT	NonSyn	A136C	AC	0	9	0	8	0	0	0	Mosquito	A	3.286083e-06	1.701643e-07	MF.9	0	1101027	C	C	L	HC	0.6576	0.4574	0
3331	14	N	H	136	A	C	AAT	CAT	NonSyn	A136C	AC	0	9	0	8	0	0	0	Mosquito	B	2.391816e-06	1.394774e-07	MF.9	0	1133196	C	C	L	HC	0.6576	0.4574	0
3332	14	N	I	137	A	T	AAT	ATT	NonSyn	A137T	AT	1	8	1	7	0	0	0	Mosquito	A	2.875636e-06	1.187371e-07	MF.9	0	1117552	C	C	L	HC	0.6576	0.4574	0
3333	14	N	K	138	T	G	AAT	AAG	NonSyn	T138G	TG	2	7	1	7	0.6651663	0	1.662916	Human	A	1.799189e-06	1.556942e-07	MF.9	0	1045209	C	C	N	HC	0.6576	0.4574	0
3334	14	N	K	138	T	G	AAT	AAG	NonSyn	T138G	TG	0	9	0	8	0	0	0	Mosquito	A	3.486291e-06	1.611304e-07	MF.9	0	1109547	C	C	L	HC	0.6576	0.4574	0
3335	14	N	K	138	T	G	AAT	AAG	NonSyn	T138G	TG	0	9	0	8	0	0	0	Mosquito	B	2.030327e-06	1.119074e-07	MF.9	0	1141716	C	C	L	HC	0.6576	0.4574	0
3336	14	N	N	138	T	C	AAT	AAC	Syn	T138C	TC	5	4	1	7	0	0	0	Mosquito	B	8.756502e-06	5.645669e-07	MF.9	4.618218e-06	1133198	S	C	L	HC	0.6576	0.4574	0
3337	14	N	S	137	A	G	AAT	AGT	NonSyn	A137G	AG	9	0	8	0	0.5992575	0.3537844	0.7703215	Human	A	1.14325e-05	8.091075e-07	MF.9	1.702533e-05	1045208	C	C	D	HC	0.6576	0.4574	0
3338	14	N	T	137	A	C	AAT	ACT	NonSyn	A137C	AC	9	2	8	0	2.302745	0.2154388	3.873245	Human	B	2.288044e-06	1.737362e-07	MF.9	4.014452e-05	1068859	C	C	N	HC	0.6576	0.4574	0
3339	14	N	Y	136	A	T	AAT	TAT	NonSyn	A136T	AT	0	9	0	8	0	0	0	Human	A	2.37871e-06	1.833534e-07	MF.9	0	1053213	C	C	L	HC	0.6576	0.4574	0
3340	14	N	Y	136	A	T	AAT	TAT	NonSyn	A136T	AT	0	9	0	8	0	0	0	Human	B	2.589251e-06	1.43343e-07	MF.9	0	1085382	C	C	L	HC	0.6576	0.4574	0
3341	14	N	Y	136	A	T	AAT	TAT	NonSyn	A136T	AT	0	9	0	8	0	0	0	Mosquito	A	2.875636e-06	1.187371e-07	MF.9	0	1117551	C	C	L	HC	0.6576	0.4574	0
3342	14	N	Y	136	A	T	AAT	TAT	NonSyn	A136T	AT	0	9	0	8	0	0	0	Mosquito	B	2.369747e-06	1.784832e-07	MF.9	0	1149720	C	C	L	HC	0.6576	0.4574	0
3343	15	M	I	141	G	A	ATG	ATA	NonSyn	G141A	GA	3	6	1	7	0	0	0.04340051	Human	A	6.69739e-06	4.668841e-07	MF.9	1.7113e-06	1029500	C	C	D	HC	0.6531	0.4505	0
3344	15	M	I	141	G	A	ATG	ATA	NonSyn	G141A	GA	2	7	1	7	0	0	0	Human	B	7.684204e-06	4.645403e-07	MF.9	6.46977e-06	1061669	C	C	L	HC	0.6531	0.4505	0
3345	15	M	I	141	G	A	ATG	ATA	NonSyn	G141A	GA	2	7	0	8	0	0	0	Mosquito	B	6.112924e-06	3.730988e-07	MF.9	1.149394e-06	1126007	C	C	L	HC	0.6531	0.4505	0
3346	15	M	K	140	T	A	ATG	AAG	NonSyn	T140A	TA	9	8	8	0	1.501365	0.8066475	2.244984	Human	B	4.145682e-06	2.689648e-07	MF.9	0.0004116337	1061668	C	C	N	HC	0.6531	0.4505	0
3347	15	M	K	140	T	A	ATG	AAG	NonSyn	T140A	TA	9	3	8	0	1.399233	0.572593	2.40861	Mosquito	B	4.312763e-06	3.05777e-07	MF.9	3.827392e-05	1126006	C	C	N	HC	0.6531	0.4505	0
3348	15	M	L	139	A	C	ATG	CTG	NonSyn	A139C	AC	1	8	0	8	0	0	0	Human	A	2.326514e-06	2.040447e-07	MF.9	1.673259e-06	1036692	C	C	L	HC	0.6531	0.4505	0
3349	15	M	L	139	A	C	ATG	CTG	NonSyn	A139C	AC	0	9	0	8	0	0	0	Human	B	2.288044e-06	1.737362e-07	MF.9	0	1068861	C	C	L	HC	0.6531	0.4505	0
3350	15	M	L	139	A	C	ATG	CTG	NonSyn	A139C	AC	0	9	0	8	0	0	0	Mosquito	A	3.286083e-06	1.701643e-07	MF.9	0	1101030	C	C	L	HC	0.6531	0.4505	0
3351	15	M	L	139	A	T	ATG	TTG	NonSyn	A139T	AT	1	8	1	7	0	0	0	Mosquito	A	2.875636e-06	1.187371e-07	MF.9	0	1117553	C	C	L	HC	0.6531	0.4505	0
3352	15	M	L	139	A	C	ATG	CTG	NonSyn	A139C	AC	0	9	0	8	0	0	0	Mosquito	B	2.391816e-06	1.394774e-07	MF.9	0	1133199	C	C	L	HC	0.6531	0.4505	0
3353	15	M	R	140	T	G	ATG	AGG	NonSyn	T140G	TG	1	8	1	7	0	0	0.3686484	Human	A	1.799189e-06	1.556942e-07	MF.9	0	1045211	C	C	D	HC	0.6531	0.4505	0
3354	15	M	R	140	T	G	ATG	AGG	NonSyn	T140G	TG	0	9	0	8	0	0	0	Human	B	1.80746e-06	1.143024e-07	MF.9	0	1077380	C	C	L	HC	0.6531	0.4505	0
3355	15	M	R	140	T	G	ATG	AGG	NonSyn	T140G	TG	1	8	1	7	0	0	0	Mosquito	A	3.486291e-06	1.611304e-07	MF.9	0	1109549	C	C	L	HC	0.6531	0.4505	0
3356	15	M	T	140	T	C	ATG	ACG	NonSyn	T140C	TC	2	7	0	8	0	0	0	Human	A	8.304354e-06	4.831455e-07	MF.9	0	1036693	C	C	L	HC	0.6531	0.4505	0
3357	15	M	T	140	T	C	ATG	ACG	NonSyn	T140C	TC	2	7	0	8	0	0	0	Human	B	8.638697e-06	3.744363e-07	MF.9	0	1068862	C	C	L	HC	0.6531	0.4505	0
3358	15	M	T	140	T	C	ATG	ACG	NonSyn	T140C	TC	4	5	1	7	0.09405924	0	0.2351481	Mosquito	A	1.724887e-05	1.124953e-06	MF.9	0	1101031	C	C	D	HC	0.6531	0.4505	0
3359	15	M	T	140	T	C	ATG	ACG	NonSyn	T140C	TC	3	6	0	8	0	0	0	Mosquito	B	8.756502e-06	5.645669e-07	MF.9	5.799078e-06	1133200	C	C	L	HC	0.6531	0.4505	0
3360	15	M	V	139	A	G	ATG	GTG	NonSyn	A139G	AG	1	8	1	7	0.2365106	0	0.5912765	Mosquito	A	1.210803e-05	6.184859e-07	MF.9	0	1109548	C	C	D	HC	0.6531	0.4505	0
3361	16	L	L	144	G	C	CTG	CTC	Syn	G144C	GC	9	4	8	0	2.168744	0.2943406	3.408653	Human	B	4.230269e-06	2.592937e-07	MF.9	4.429483e-05	1068865	S	C	N	HC	0.5419	0.4431	0
3362	16	L	L	144	G	T	CTG	CTT	Syn	G144T	GT	9	3	8	0	0.9291428	0.3519816	1.450678	Human	B	7.052585e-06	4.58263e-07	MF.9	1.89835e-05	1085387	S	C	N	HC	0.5419	0.4431	0
3363	16	L	M	142	C	A	CTG	ATG	NonSyn	C142A	CA	0	9	0	8	0	0	0	Human	A	2.985888e-06	1.847504e-07	MF.9	0	1029501	C	C	L	HC	0.5419	0.4431	0
3364	16	L	M	142	C	A	CTG	ATG	NonSyn	C142A	CA	2	7	1	7	0	0	0	Human	B	3.57888e-06	4.588673e-07	MF.9	6.350053e-06	1061670	C	C	L	HC	0.5419	0.4431	0
3365	16	L	M	142	C	A	CTG	ATG	NonSyn	C142A	CA	2	7	1	7	0.9174436	0	1.834887	Mosquito	A	6.508077e-06	1.996644e-07	MF.9	0	1093839	C	C	N	HC	0.5419	0.4431	0
3366	16	L	M	142	C	A	CTG	ATG	NonSyn	C142A	CA	1	8	0	8	0	0	0	Mosquito	B	4.124727e-06	2.499298e-07	MF.9	0	1126008	C	C	L	HC	0.5419	0.4431	0
3367	16	L	P	143	T	C	CTG	CCG	NonSyn	T143C	TC	3	6	1	7	0	0	0	Human	A	8.304354e-06	4.831455e-07	MF.9	5.221914e-06	1036695	C	C	L	HC	0.5419	0.4431	0
3368	16	L	P	143	T	C	CTG	CCG	NonSyn	T143C	TC	3	6	1	7	0	0	0	Mosquito	A	1.724887e-05	1.124953e-06	MF.9	6.762194e-06	1101033	C	C	L	HC	0.5419	0.4431	0
3369	16	L	P	143	T	C	CTG	CCG	NonSyn	T143C	TC	5	4	1	7	0	0	0	Mosquito	B	8.756502e-06	5.645669e-07	MF.9	1.175581e-06	1133202	C	C	L	HC	0.5419	0.4431	0
3370	16	L	Q	143	T	A	CTG	CAG	NonSyn	T143A	TA	1	8	0	8	0	0	0	Mosquito	A	7.166782e-06	3.393327e-07	MF.9	0	1093840	C	C	L	HC	0.5419	0.4431	0
3371	16	L	Q	143	T	A	CTG	CAG	NonSyn	T143A	TA	4	5	1	7	0	0	0	Mosquito	B	4.312763e-06	3.05777e-07	MF.9	3.526744e-06	1126009	C	C	L	HC	0.5419	0.4431	0
3372	16	L	V	142	C	G	CTG	GTG	NonSyn	C142G	CG	9	2	8	0	2.820825	0.08817379	5.831648	Human	B	1.455268e-06	7.022105e-08	MF.9	5.080042e-05	1077381	C	C	N	HC	0.5419	0.4431	0
3373	16	L	V	142	C	G	CTG	GTG	NonSyn	C142G	CG	0	9	0	8	0	0	0	Mosquito	A	2.20927e-06	9.740866e-08	MF.9	0	1109550	C	C	L	HC	0.5419	0.4431	0
3374	17	K	I	146	A	T	AAA	ATA	NonSyn	A146T	AT	1	8	1	7	1.341645	0	3.354112	Human	A	2.37871e-06	1.833534e-07	MF.9	0	1053220	NC	C	N	HC	0.5456	0.4371	0
3375	17	K	I	146	A	T	AAA	ATA	NonSyn	A146T	AT	3	6	1	7	0	0	0	Mosquito	B	2.369747e-06	1.784832e-07	MF.9	0	1149727	NC	C	L	HC	0.5456	0.4371	0
3376	17	K	K	147	A	G	AAA	AAG	Syn	A147G	AG	9	0	8	0	0.9712214	0.3287683	1.722336	Human	B	1.213945e-05	3.148199e-07	MF.9	2.543769e-05	1077385	S	C	N	HC	0.5456	0.4371	0
3377	17	K	K	147	A	G	AAA	AAG	Syn	A147G	AG	9	4	8	0	0.8311358	0.5075711	1.140901	Mosquito	B	1.180995e-05	6.889282e-07	MF.9	1.326358e-05	1141723	S	C	N	HC	0.5456	0.4371	0
3378	17	K	N	147	A	C	AAA	AAC	NonSyn	A147C	AC	2	7	1	7	0	0	0.3276367	Human	A	2.326514e-06	2.040447e-07	MF.9	0	1036699	C	C	D	HC	0.5456	0.4371	0
3379	17	K	N	147	A	C	AAA	AAC	NonSyn	A147C	AC	1	8	1	7	0	0	0	Mosquito	A	3.286083e-06	1.701643e-07	MF.9	0	1101037	C	C	L	HC	0.5456	0.4371	0
3380	17	K	N	147	A	T	AAA	AAT	NonSyn	A147T	AT	2	7	1	7	0	0	0	Mosquito	A	2.875636e-06	1.187371e-07	MF.9	6.684849e-06	1117559	C	C	L	HC	0.5456	0.4371	0
3381	17	K	Q	145	A	C	AAA	CAA	NonSyn	A145C	AC	9	4	8	0	1.757544	0.791614	2.654458	Human	A	2.326514e-06	2.040447e-07	MF.9	5.513733e-05	1036697	C	C	N	HC	0.5456	0.4371	0
3382	17	K	Q	145	A	C	AAA	CAA	NonSyn	A145C	AC	9	5	8	0	1.165148	0.4936873	1.983693	Human	B	2.288044e-06	1.737362e-07	MF.9	4.361398e-05	1068866	C	C	N	HC	0.5456	0.4371	0
3383	17	K	X	145	A	T	AAA	TAA	NonSyn	A145T	AT	9	2	8	0	1.239625	0.4308434	1.906994	Human	A	2.37871e-06	1.833534e-07	MF.9	3.675822e-06	1053219	X	C	N	HC	0.5456	0.4371	0
3384	17	K	X	145	A	T	AAA	TAA	NonSyn	A145T	AT	9	4	8	0	1.226389	0.477821	1.61985	Human	B	2.589251e-06	1.43343e-07	MF.9	1.869171e-05	1085388	X	C	N	HC	0.5456	0.4371	0
3385	18	R	C	148	C	T	CGC	TGC	NonSyn	C148T	CT	9	9	8	0	0.6314548	0.3943109	0.8584834	Mosquito	A	0.0001578562	6.997471e-06	MF.9	0.000292959	1117560	C	C	D	HC	0.5456	0.4329	0
3386	18	R	G	148	C	G	CGC	GGC	NonSyn	C148G	CG	0	9	0	8	0	0	0	Human	A	1.604509e-06	2.564144e-07	MF.9	0	1045217	C	C	L	HC	0.5456	0.4329	0
3387	18	R	G	148	C	G	CGC	GGC	NonSyn	C148G	CG	0	9	0	8	0	0	0	Mosquito	A	2.20927e-06	9.740866e-08	MF.9	0	1109555	C	C	L	HC	0.5456	0.4329	0
3388	18	R	G	148	C	G	CGC	GGC	NonSyn	C148G	CG	1	8	1	7	0	0	0	Mosquito	B	1.513275e-06	1.225367e-07	MF.9	0	1141724	C	C	L	HC	0.5456	0.4329	0
3389	18	R	L	149	G	T	CGC	CTC	NonSyn	G149T	GT	9	9	8	0	0.8667687	0.7831931	1.109692	Mosquito	A	2.290083e-05	1.366303e-06	MF.9	0.0004497428	1117561	C	C	N	HC	0.5456	0.4329	0
3390	18	R	R	150	C	A	CGC	CGA	Syn	C150A	CA	1	8	1	7	0	0	0	Human	A	2.985888e-06	1.847504e-07	MF.9	0	1029506	S	C	L	HC	0.5456	0.4329	0
3391	18	R	R	150	C	G	CGC	CGG	Syn	C150G	CG	1	8	1	7	0	0	4.868266	Human	A	1.604509e-06	2.564144e-07	MF.9	0	1045218	S	C	N	HC	0.5456	0.4329	0
3392	18	R	R	150	C	T	CGC	CGT	Syn	C150T	CT	9	9	8	0	0.5622282	0.2098221	1.025992	Human	A	0.0002554735	2.089311e-05	MF.9	0.0003461753	1053224	S	C	N	HC	0.5456	0.4329	0
3393	18	R	R	150	C	G	CGC	CGG	Syn	C150G	CG	1	8	1	7	0.5557112	0	1.389278	Human	B	1.455268e-06	7.022105e-08	MF.9	0	1077387	S	C	N	HC	0.5456	0.4329	0
3394	18	R	R	150	C	T	CGC	CGT	Syn	C150T	CT	9	9	8	0	0.5892935	0.1835129	0.7489114	Human	B	0.0002635581	1.843403e-05	MF.9	0.0008063258	1085393	S	C	D	HC	0.5456	0.4329	0
3395	18	R	R	150	C	A	CGC	CGA	Syn	C150A	CA	1	8	0	8	0	0	0	Mosquito	B	4.124727e-06	2.499298e-07	MF.9	0	1126013	S	C	L	HC	0.5456	0.4329	0
3396	18	R	R	150	C	T	CGC	CGT	Syn	C150T	CT	9	9	8	0	0.532796	0.4281211	0.6797856	Mosquito	B	0.0002034795	7.793136e-06	MF.9	0.0004329883	1149731	S	C	D	HC	0.5456	0.4329	0
3397	19	E	D	153	G	T	GAG	GAT	NonSyn	G153T	GT	9	1	8	0	0.5067781	0.09442561	2.753675	Human	B	7.052585e-06	4.58263e-07	MF.9	3.79461e-05	1085396	C	C	N	HC	0.4831	0.4306	0
3398	19	E	E	153	G	A	GAG	GAA	Syn	G153A	GA	3	6	1	7	0.1091862	0	0.2729654	Mosquito	B	6.112924e-06	3.730988e-07	MF.9	0	1126015	S	C	D	HC	0.4831	0.4306	0
3399	19	E	G	152	A	G	GAG	GGG	NonSyn	A152G	AG	5	4	1	7	0	0	0	Human	A	1.14325e-05	8.091075e-07	MF.9	6.316694e-06	1045219	C	C	L	HC	0.4831	0.4306	0
3400	19	E	G	152	A	G	GAG	GGG	NonSyn	A152G	AG	5	4	0	8	0	0	0	Mosquito	B	1.180995e-05	6.889282e-07	MF.9	5.4701e-06	1141726	C	C	L	HC	0.4831	0.4306	0
3401	19	E	K	151	G	A	GAG	AAG	NonSyn	G151A	GA	9	4	8	0	1.000905	0.4658881	1.768079	Human	A	6.69739e-06	4.668841e-07	MF.9	3.39526e-05	1029507	C	C	N	HC	0.4831	0.4306	0
3402	19	E	Q	151	G	C	GAG	CAG	NonSyn	G151C	GC	8	3	8	0	1.222642	0.09799861	2.68542	Mosquito	A	1.263716e-05	7.038203e-07	MF.9	2.974774e-05	1101039	C	C	N	HC	0.4831	0.4306	0
3403	19	E	V	152	A	T	GAG	GTG	NonSyn	A152T	AT	1	8	1	7	0	0	0	Mosquito	A	2.875636e-06	1.187371e-07	MF.9	0	1117564	C	C	L	HC	0.4831	0.4306	0
3404	19	E	X	151	G	T	GAG	TAG	NonSyn	G151T	GT	9	1	8	0	0.6080601	0.3828742	0.8835135	Human	B	7.052585e-06	4.58263e-07	MF.9	2.557152e-05	1085394	X	C	D	HC	0.4831	0.4306	0
3405	20	R	I	155	G	T	AGA	ATA	NonSyn	G155T	GT	9	4	8	0	2.019727	0.8428447	3.171834	Human	A	5.90433e-06	1.997031e-07	MF.9	7.210211e-05	1053229	NC	C	N	HC	0.4766	0.4294	0
3406	20	R	I	155	G	T	AGA	ATA	NonSyn	G155T	GT	9	6	8	0	1.233476	0.04996164	2.016839	Human	B	7.052585e-06	4.58263e-07	MF.9	9.356463e-05	1085398	NC	C	N	HC	0.4766	0.4294	0
3407	20	R	I	155	G	T	AGA	ATA	NonSyn	G155T	GT	9	4	8	0	1.057258	0.6630296	1.535935	Mosquito	B	7.493022e-06	1.393832e-06	MF.9	2.111014e-05	1149736	NC	C	N	HC	0.4766	0.4294	0
3408	20	R	K	155	G	A	AGA	AAA	NonSyn	G155A	GA	5	4	1	7	0	0	0.5463766	Human	A	6.69739e-06	4.668841e-07	MF.9	4.506382e-06	1029509	C	C	D	HC	0.4766	0.4294	0
3409	20	R	K	155	G	A	AGA	AAA	NonSyn	G155A	GA	4	5	1	7	0	0	0.009508519	Mosquito	A	8.774931e-06	2.38219e-07	MF.9	5.191488e-06	1093847	C	C	D	HC	0.4766	0.4294	0
3410	20	R	K	155	G	A	AGA	AAA	NonSyn	G155A	GA	4	5	0	8	0	0	0	Mosquito	B	6.112924e-06	3.730988e-07	MF.9	4.222028e-06	1126016	C	C	L	HC	0.4766	0.4294	0
3411	20	R	R	154	A	C	AGA	CGA	Syn	A154C	AC	1	8	1	7	0	0	0	Human	B	2.288044e-06	1.737362e-07	MF.9	0	1068873	S	C	L	HC	0.4766	0.4294	0
3412	20	R	R	156	A	G	AGA	AGG	Syn	A156G	AG	9	0	8	0	0.5954922	0.2326056	1.017622	Human	B	1.213945e-05	3.148199e-07	MF.9	3.734386e-05	1077390	S	C	N	HC	0.4766	0.4294	0
3413	20	R	R	154	A	C	AGA	CGA	Syn	A154C	AC	0	9	0	8	0	0	0	Mosquito	A	3.286083e-06	1.701643e-07	MF.9	0	1101042	S	C	L	HC	0.4766	0.4294	0
3414	20	R	R	154	A	C	AGA	CGA	Syn	A154C	AC	2	7	0	8	0	0	0	Mosquito	B	2.391816e-06	1.394774e-07	MF.9	2.81288e-06	1133211	S	C	L	HC	0.4766	0.4294	0
3415	20	R	S	156	A	T	AGA	AGT	NonSyn	A156T	AT	9	5	8	0	1.655784	0.7445496	2.567019	Human	A	2.37871e-06	1.833534e-07	MF.9	0.000125383	1053230	NC	C	N	HC	0.4766	0.4294	0
3416	20	R	S	156	A	T	AGA	AGT	NonSyn	A156T	AT	9	7	8	0	0.8907603	0.3604505	1.24096	Human	B	2.589251e-06	1.43343e-07	MF.9	7.468771e-05	1085399	NC	C	N	HC	0.4766	0.4294	0
3417	20	R	S	156	A	T	AGA	AGT	NonSyn	A156T	AT	9	2	8	0	1.086753	0.5802835	1.499024	Mosquito	A	2.875636e-06	1.187371e-07	MF.9	6.538709e-05	1117568	NC	C	N	HC	0.4766	0.4294	0
3418	20	R	S	156	A	T	AGA	AGT	NonSyn	A156T	AT	9	5	8	0	1.512487	1.211007	1.976043	Mosquito	B	2.369747e-06	1.784832e-07	MF.9	5.936059e-05	1149737	NC	C	B	HC	0.4766	0.4294	0
3419	20	R	X	154	A	T	AGA	TGA	NonSyn	A154T	AT	2	7	1	7	0.280611	0	0.7015276	Human	B	2.589251e-06	1.43343e-07	MF.9	0	1085397	X	C	D	HC	0.4766	0.4294	0
3420	20	R	X	154	A	T	AGA	TGA	NonSyn	A154T	AT	0	9	0	8	0	0	0	Mosquito	A	2.875636e-06	1.187371e-07	MF.9	0	1117566	X	C	L	HC	0.4766	0.4294	0
3421	20	R	X	154	A	T	AGA	TGA	NonSyn	A154T	AT	2	7	1	7	0	0	0	Mosquito	B	2.369747e-06	1.784832e-07	MF.9	2.81288e-06	1149735	X	C	L	HC	0.4766	0.4294	0
3422	21	N	H	157	A	C	AAC	CAC	NonSyn	A157C	AC	1	8	0	8	0	0	0	Human	A	2.326514e-06	2.040447e-07	MF.9	0	1036707	C	C	L	HC	0.4725	0.4296	0
3423	21	N	H	157	A	C	AAC	CAC	NonSyn	A157C	AC	1	8	1	7	0	0	0	Human	B	2.288044e-06	1.737362e-07	MF.9	0	1068876	C	C	L	HC	0.4725	0.4296	0
3424	21	N	H	157	A	C	AAC	CAC	NonSyn	A157C	AC	0	9	0	8	0	0	0	Mosquito	A	3.286083e-06	1.701643e-07	MF.9	0	1101045	C	C	L	HC	0.4725	0.4296	0
3425	21	N	K	159	C	G	AAC	AAG	NonSyn	C159G	CG	0	9	0	8	0	0	0	Human	B	1.455268e-06	7.022105e-08	MF.9	0	1077393	C	C	L	HC	0.4725	0.4296	0
3426	21	N	K	159	C	A	AAC	AAA	NonSyn	C159A	CA	1	8	0	8	0	0	0	Mosquito	A	6.508077e-06	1.996644e-07	MF.9	0	1093848	C	C	L	HC	0.4725	0.4296	0
3427	21	N	K	159	C	G	AAC	AAG	NonSyn	C159G	CG	1	8	1	7	0	0	0	Mosquito	A	2.20927e-06	9.740866e-08	MF.9	0	1109562	C	C	L	HC	0.4725	0.4296	0
3428	21	N	T	158	A	C	AAC	ACC	NonSyn	A158C	AC	1	8	1	7	0.5316336	0	1.063267	Human	B	2.288044e-06	1.737362e-07	MF.9	0	1068877	C	C	N	HC	0.4725	0.4296	0
3429	21	N	T	158	A	C	AAC	ACC	NonSyn	A158C	AC	1	8	1	7	0	0	0	Mosquito	A	3.286083e-06	1.701643e-07	MF.9	0	1101046	C	C	L	HC	0.4725	0.4296	0
3430	21	N	Y	157	A	T	AAC	TAC	NonSyn	A157T	AT	1	8	1	7	0	0	0	Mosquito	A	2.875636e-06	1.187371e-07	MF.9	0	1117569	C	C	L	HC	0.4725	0.4296	0
3431	22	R	C	160	C	T	CGC	TGC	NonSyn	C160T	CT	9	9	8	0	0.6523444	0.3143889	0.9902999	Human	A	0.0002554735	2.089311e-05	MF.9	0.0004479757	1053234	C	C	D	HC	0.4801	0.4305	0
3432	22	R	C	160	C	T	CGC	TGC	NonSyn	C160T	CT	9	9	8	0	0.5604898	0.3958816	0.7495874	Human	B	0.0002635581	1.843403e-05	MF.9	0.0007071908	1085403	C	C	D	HC	0.4801	0.4305	0
3433	22	R	C	160	C	T	CGC	TGC	NonSyn	C160T	CT	9	9	8	0	0.3992059	0.2363366	0.4967554	Mosquito	A	0.0001578562	6.997471e-06	MF.9	0.0001616488	1117572	C	C	D	HC	0.4801	0.4305	0
3434	22	R	C	160	C	T	CGC	TGC	NonSyn	C160T	CT	9	9	8	0	0.5429524	0.3343864	0.7215566	Mosquito	B	0.0002034795	7.793136e-06	MF.9	0.0004545592	1149741	C	C	D	HC	0.4801	0.4305	0
3435	22	R	G	160	C	G	CGC	GGC	NonSyn	C160G	CG	1	8	1	7	0.7132478	0	1.426496	Human	A	1.604509e-06	2.564144e-07	MF.9	0	1045225	C	C	N	HC	0.4801	0.4305	0
3436	22	R	G	160	C	G	CGC	GGC	NonSyn	C160G	CG	1	8	1	7	0	0	0	Human	B	1.455268e-06	7.022105e-08	MF.9	6.429008e-06	1077394	C	C	L	HC	0.4801	0.4305	0
3437	22	R	G	160	C	G	CGC	GGC	NonSyn	C160G	CG	0	9	0	8	0	0	0	Mosquito	A	2.20927e-06	9.740866e-08	MF.9	0	1109563	C	C	L	HC	0.4801	0.4305	0
3438	22	R	G	160	C	G	CGC	GGC	NonSyn	C160G	CG	1	8	1	7	0	0	1.419911	Mosquito	B	1.513275e-06	1.225367e-07	MF.9	0	1141732	C	C	N	HC	0.4801	0.4305	0
3439	22	R	L	161	G	T	CGC	CTC	NonSyn	G161T	GT	7	2	1	7	0.09456029	0	0.1891206	Mosquito	A	2.290083e-05	1.366303e-06	MF.9	1.509274e-05	1117573	C	C	D	HC	0.4801	0.4305	0
3440	22	R	R	162	C	G	CGC	CGG	Syn	C162G	CG	0	9	0	8	0	0	0	Human	A	1.604509e-06	2.564144e-07	MF.9	0	1045226	S	C	L	HC	0.4801	0.4305	0
3441	22	R	R	162	C	T	CGC	CGT	Syn	C162T	CT	9	9	8	0	0.9621867	0.5555689	1.178452	Human	A	0.0002554735	2.089311e-05	MF.9	0.0006406344	1053236	S	C	N	HC	0.4801	0.4305	0
3442	22	R	R	162	C	A	CGC	CGA	Syn	C162A	CA	8	4	8	0	1.058068	0.355124	1.761012	Human	B	3.57888e-06	4.588673e-07	MF.9	1.899203e-05	1061682	S	C	N	HC	0.4801	0.4305	0
3443	22	R	R	162	C	G	CGC	CGG	Syn	C162G	CG	0	9	0	8	0	0	0	Human	B	1.455268e-06	7.022105e-08	MF.9	0	1077395	S	C	L	HC	0.4801	0.4305	0
3444	22	R	R	162	C	T	CGC	CGT	Syn	C162T	CT	9	9	8	0	0.6860734	0.3399661	1.076474	Human	B	0.0002635581	1.843403e-05	MF.9	0.0008989561	1085405	S	C	N	HC	0.4801	0.4305	0
3445	22	R	R	162	C	A	CGC	CGA	Syn	C162A	CA	2	7	1	7	0	0	0.1614366	Mosquito	A	6.508077e-06	1.996644e-07	MF.9	0	1093851	S	C	D	HC	0.4801	0.4305	0
3446	22	R	R	162	C	G	CGC	CGG	Syn	C162G	CG	1	8	1	7	1.119426	0	2.798565	Mosquito	A	2.20927e-06	9.740866e-08	MF.9	0	1109564	S	C	N	HC	0.4801	0.4305	0
3447	22	R	R	162	C	T	CGC	CGT	Syn	C162T	CT	9	9	8	0	0.4919563	0.169131	1.27714	Mosquito	A	0.0001578562	6.997471e-06	MF.9	0.0002528407	1117574	S	C	N	HC	0.4801	0.4305	0
3448	22	R	R	162	C	T	CGC	CGT	Syn	C162T	CT	9	9	8	0	0.6961478	0.5621591	0.8301365	Mosquito	B	0.0002034795	7.793136e-06	MF.9	0.0006382379	1149743	S	C	D	HC	0.4801	0.4305	0
3449	23	V	A	164	T	C	GTG	GCG	NonSyn	T164C	TC	9	4	8	0	1.328808	0.2691508	2.488963	Human	A	8.304354e-06	4.831455e-07	MF.9	0.0001000821	1036711	NC	C	N	HC	0.3426	0.4331	0
3450	23	V	A	164	T	C	GTG	GCG	NonSyn	T164C	TC	9	2	8	0	0.9759209	0.8042372	1.263188	Human	B	8.638697e-06	3.744363e-07	MF.9	1.270349e-05	1068880	NC	C	N	HC	0.3426	0.4331	0
3451	23	V	G	164	T	G	GTG	GGG	NonSyn	T164G	TG	1	8	1	7	0	0	0	Human	B	1.80746e-06	1.143024e-07	MF.9	0	1077396	NC	C	L	HC	0.3426	0.4331	0
3452	23	V	G	164	T	G	GTG	GGG	NonSyn	T164G	TG	1	8	1	7	0	0	0	Mosquito	B	2.030327e-06	1.119074e-07	MF.9	0	1141734	NC	C	L	HC	0.3426	0.4331	0
3453	23	V	L	163	G	C	GTG	CTG	NonSyn	G163C	GC	1	8	1	7	0	0	0	Human	B	4.230269e-06	2.592937e-07	MF.9	0	1068879	C	C	L	HC	0.3426	0.4331	0
3454	23	V	L	163	G	C	GTG	CTG	NonSyn	G163C	GC	1	8	1	7	0	0	0	Mosquito	B	3.432927e-06	9.570197e-07	MF.9	0	1133217	C	C	L	HC	0.3426	0.4331	0
3455	23	V	V	165	G	T	GTG	GTT	Syn	G165T	GT	9	9	8	0	0.8709915	0.6497696	1.271646	Human	A	5.90433e-06	1.997031e-07	MF.9	3.480198e-05	1053238	S	C	N	HC	0.3426	0.4331	0
3456	23	V	V	165	G	T	GTG	GTT	Syn	G165T	GT	9	8	8	0	1.535107	0.6306515	2.158804	Human	B	7.052585e-06	4.58263e-07	MF.9	0.0001352805	1085407	S	C	N	HC	0.3426	0.4331	0
3457	23	V	V	165	G	T	GTG	GTT	Syn	G165T	GT	9	8	8	0	1.525411	0.4915499	2.559272	Mosquito	A	2.290083e-05	1.366303e-06	MF.9	0.0001296586	1117576	S	C	N	HC	0.3426	0.4331	0
3458	23	V	V	165	G	T	GTG	GTT	Syn	G165T	GT	9	8	8	0	1.218271	0.6846372	1.758857	Mosquito	B	7.493022e-06	1.393832e-06	MF.9	6.339733e-05	1149745	S	C	N	HC	0.3426	0.4331	0
3459	24	S	L	167	C	T	TCG	TTG	NonSyn	C167T	CT	9	9	8	0	0.6537106	0.3522001	0.9552211	Human	A	0.0002554735	2.089311e-05	MF.9	0.0004169009	1053239	NC	C	D	HC	0.4541	0.4314	0
3460	24	S	L	167	C	T	TCG	TTG	NonSyn	C167T	CT	9	9	8	0	0.4188806	0.3026685	0.4778006	Human	B	0.0002635581	1.843403e-05	MF.9	0.0004899434	1085408	NC	C	D	HC	0.4541	0.4314	0
3461	24	S	L	167	C	T	TCG	TTG	NonSyn	C167T	CT	9	9	8	0	0.4019715	0.3030068	0.5930063	Mosquito	A	0.0001578562	6.997471e-06	MF.9	0.0001967144	1117577	NC	C	D	HC	0.4541	0.4314	0
3462	24	S	P	166	T	C	TCG	CCG	NonSyn	T166C	TC	9	0	8	0	0.8470108	0.2466875	1.270518	Human	A	8.304354e-06	4.831455e-07	MF.9	1.614772e-05	1036713	C	C	N	HC	0.4541	0.4314	0
3463	24	S	S	168	G	A	TCG	TCA	Syn	G168A	GA	9	3	8	0	1.176069	0.4589281	1.911572	Human	A	6.69739e-06	4.668841e-07	MF.9	1.925691e-05	1029519	S	C	N	HC	0.4541	0.4314	0
3464	24	S	S	168	G	C	TCG	TCC	Syn	G168C	GC	9	7	8	0	0.7449878	0.4758577	1.014118	Human	A	3.700457e-06	2.674076e-07	MF.9	1.155415e-05	1036714	S	C	N	HC	0.4541	0.4314	0
3465	24	S	S	168	G	C	TCG	TCC	Syn	G168C	GC	9	7	8	0	1.625817	0.3325936	2.398806	Human	B	4.230269e-06	2.592937e-07	MF.9	0.0001125668	1068883	S	C	N	HC	0.4541	0.4314	0
3466	24	S	S	168	G	A	TCG	TCA	Syn	G168A	GA	9	2	8	0	0.9802429	0.5469442	2.352434	Mosquito	A	8.774931e-06	2.38219e-07	MF.9	5.502256e-05	1093857	S	C	N	HC	0.4541	0.4314	0
3467	24	S	S	168	G	C	TCG	TCC	Syn	G168C	GC	3	6	1	7	0	0	0	Mosquito	A	1.263716e-05	7.038203e-07	MF.9	0	1101052	S	C	L	HC	0.4541	0.4314	0
3468	24	S	S	168	G	A	TCG	TCA	Syn	G168A	GA	9	5	8	0	1.36028	0.2519184	2.201098	Mosquito	B	6.112924e-06	3.730988e-07	MF.9	4.337622e-05	1126026	S	C	N	HC	0.4541	0.4314	0
3469	24	S	S	168	G	C	TCG	TCC	Syn	G168C	GC	9	0	8	0	1.255018	0.5284556	1.80815	Mosquito	B	3.432927e-06	9.570197e-07	MF.9	1.598071e-05	1133221	S	C	N	HC	0.4541	0.4314	0
3470	24	S	T	166	T	A	TCG	ACG	NonSyn	T166A	TA	1	8	1	7	0	0	0	Mosquito	B	4.312763e-06	3.05777e-07	MF.9	0	1126024	C	C	L	HC	0.4541	0.4314	0
3471	24	S	W	167	C	G	TCG	TGG	NonSyn	C167G	CG	0	9	0	8	0	0	0	Human	A	1.604509e-06	2.564144e-07	MF.9	0	1045229	NS	C	L	HC	0.4541	0.4314	0
3472	24	S	W	167	C	G	TCG	TGG	NonSyn	C167G	CG	1	8	1	7	1.020713	0	2.041425	Human	B	1.455268e-06	7.022105e-08	MF.9	0	1077398	NS	C	N	HC	0.4541	0.4314	0
3473	24	S	W	167	C	G	TCG	TGG	NonSyn	C167G	CG	1	8	1	7	0	0	1.59043	Mosquito	A	2.20927e-06	9.740866e-08	MF.9	0	1109567	NS	C	N	HC	0.4541	0.4314	0
3474	24	S	W	167	C	G	TCG	TGG	NonSyn	C167G	CG	0	9	0	8	0	0	0	Mosquito	B	1.513275e-06	1.225367e-07	MF.9	0	1141736	NS	C	L	HC	0.4541	0.4314	0
3475	24	S	X	167	C	A	TCG	TAG	NonSyn	C167A	CA	2	7	1	7	0	0	0.1734749	Mosquito	A	6.508077e-06	1.996644e-07	MF.9	0	1093856	X	C	D	HC	0.4541	0.4314	0
3476	25	T	A	169	A	G	ACT	GCT	NonSyn	A169G	AG	9	3	8	0	0.8398054	0.3472472	1.159528	Human	A	1.14325e-05	8.091075e-07	MF.9	4.355211e-05	1045230	C	C	N	HC	0.3566	0.4291	0
3477	25	T	A	169	A	G	ACT	GCT	NonSyn	A169G	AG	9	4	8	0	0.8502638	0.4063043	1.265534	Mosquito	A	1.210803e-05	6.184859e-07	MF.9	3.471981e-05	1109568	C	C	N	HC	0.3566	0.4291	0
3478	25	T	A	169	A	G	ACT	GCT	NonSyn	A169G	AG	9	4	8	0	1.37928	0.2461029	2.671327	Mosquito	B	1.180995e-05	6.889282e-07	MF.9	5.650649e-05	1141737	C	C	N	HC	0.3566	0.4291	0
3479	25	T	I	170	C	T	ACT	ATT	NonSyn	C170T	CT	9	9	8	0	0.4978833	0.3939934	0.6042224	Mosquito	B	0.0002034795	7.793136e-06	MF.9	0.0004552708	1149749	NC	C	D	HC	0.3566	0.4291	0
3480	25	T	N	170	C	A	ACT	AAT	NonSyn	C170A	CA	2	7	1	7	0	0	0	Human	A	2.985888e-06	1.847504e-07	MF.9	0	1029520	C	C	L	HC	0.3566	0.4291	0
3481	25	T	P	169	A	C	ACT	CCT	NonSyn	A169C	AC	1	8	1	7	0	0	0	Human	A	2.326514e-06	2.040447e-07	MF.9	0	1036715	NC	C	L	HC	0.3566	0.4291	0
3482	25	T	S	169	A	T	ACT	TCT	NonSyn	A169T	AT	9	4	8	0	0.7718622	0.479615	1.356357	Human	A	2.37871e-06	1.833534e-07	MF.9	3.959283e-06	1053241	C	C	N	HC	0.3566	0.4291	0
3483	25	T	T	171	T	A	ACT	ACA	Syn	T171A	TA	9	5	8	0	1.006047	0.4337941	2.278977	Human	B	4.145682e-06	2.689648e-07	MF.9	7.603984e-05	1061690	S	C	N	HC	0.3566	0.4291	0
3484	25	T	T	171	T	G	ACT	ACG	Syn	T171G	TG	1	8	1	7	0	0	0	Human	B	1.80746e-06	1.143024e-07	MF.9	0	1077401	S	C	L	HC	0.3566	0.4291	0
3485	25	T	T	171	T	A	ACT	ACA	Syn	T171A	TA	9	3	8	0	1.20139	0.6811939	1.6787	Mosquito	B	4.312763e-06	3.05777e-07	MF.9	3.108575e-05	1126028	S	C	N	HC	0.3566	0.4291	0
3486	26	V	A	173	T	C	GTG	GCG	NonSyn	T173C	TC	9	6	8	0	0.8715867	0.4917333	1.298553	Human	A	8.304354e-06	4.831455e-07	MF.9	6.363293e-05	1036718	NC	C	N	HC	0.3948	0.4262	0
3487	26	V	A	173	T	C	GTG	GCG	NonSyn	T173C	TC	9	4	8	0	1.930745	0.2567507	3.654869	Human	B	8.638697e-06	3.744363e-07	MF.9	0.0001126612	1068887	NC	C	N	HC	0.3948	0.4262	0
3488	26	V	A	173	T	C	GTG	GCG	NonSyn	T173C	TC	9	4	8	0	0.9585401	0.6066769	1.470704	Mosquito	A	1.724887e-05	1.124953e-06	MF.9	4.935444e-05	1101056	NC	C	N	HC	0.3948	0.4262	0
3489	26	V	A	173	T	C	GTG	GCG	NonSyn	T173C	TC	9	6	8	0	1.041366	0.8242366	1.324866	Mosquito	B	8.756502e-06	5.645669e-07	MF.9	0.0001025741	1133225	NC	C	N	HC	0.3948	0.4262	0
3490	26	V	E	173	T	A	GTG	GAG	NonSyn	T173A	TA	9	3	8	0	0.9399136	0.6206198	1.34163	Human	B	4.145682e-06	2.689648e-07	MF.9	4.381271e-05	1061692	C	C	N	HC	0.3948	0.4262	0
3491	26	V	E	173	T	A	GTG	GAG	NonSyn	T173A	TA	9	3	8	0	0.9505277	0.7980699	1.157535	Mosquito	B	4.312763e-06	3.05777e-07	MF.9	5.128705e-05	1126030	C	C	N	HC	0.3948	0.4262	0
3492	26	V	L	172	G	C	GTG	CTG	NonSyn	G172C	GC	1	8	1	7	0	0	0	Human	A	3.700457e-06	2.674076e-07	MF.9	4.072159e-06	1036717	C	C	L	HC	0.3948	0.4262	0
3493	26	V	L	172	G	T	GTG	TTG	NonSyn	G172T	GT	9	2	8	0	1.165319	0.2534323	2.128915	Human	A	5.90433e-06	1.997031e-07	MF.9	2.036079e-05	1053243	C	C	N	HC	0.3948	0.4262	0
3494	26	V	L	172	G	T	GTG	TTG	NonSyn	G172T	GT	3	6	0	8	0	0	0	Mosquito	A	2.290083e-05	1.366303e-06	MF.9	1.973262e-05	1117581	C	C	L	HC	0.3948	0.4262	0
3495	26	V	L	172	G	C	GTG	CTG	NonSyn	G172C	GC	3	6	1	7	0.371647	0	0.9291175	Mosquito	B	3.432927e-06	9.570197e-07	MF.9	4.858768e-06	1133224	C	C	D	HC	0.3948	0.4262	0
3496	26	V	M	172	G	A	GTG	ATG	NonSyn	G172A	GA	9	0	8	0	0.7455786	0.3497957	1.141361	Human	B	7.684204e-06	4.645403e-07	MF.9	1.866043e-05	1061691	C	C	N	HC	0.3948	0.4262	0
3497	26	V	V	174	G	T	GTG	GTT	Syn	G174T	GT	9	1	8	0	1.062417	0.5530403	1.354098	Human	A	5.90433e-06	1.997031e-07	MF.9	6.177034e-05	1053244	S	C	N	HC	0.3948	0.4262	0
3498	26	V	V	174	G	T	GTG	GTT	Syn	G174T	GT	8	8	8	0	0.9874504	0.713217	2.568357	Human	B	7.052585e-06	4.58263e-07	MF.9	6.283104e-05	1085413	S	C	N	HC	0.3948	0.4262	0
3499	26	V	V	174	G	C	GTG	GTC	Syn	G174C	GC	9	4	8	0	0.8535331	0.5496435	1.201722	Mosquito	A	1.263716e-05	7.038203e-07	MF.9	4.956114e-05	1101057	S	C	N	HC	0.3948	0.4262	0
3500	26	V	V	174	G	T	GTG	GTT	Syn	G174T	GT	8	4	8	0	1.216495	0.3544711	1.760675	Mosquito	B	7.493022e-06	1.393832e-06	MF.9	4.694569e-05	1149751	S	C	N	HC	0.3948	0.4262	0
3501	27	Q	H	177	A	T	CAA	CAT	NonSyn	A177T	AT	9	1	8	0	2.052471	0.4907121	4.145568	Human	B	2.589251e-06	1.43343e-07	MF.9	3.602825e-05	1085416	C	C	N	HC	0.4507	0.4271	0
3502	27	Q	K	175	C	A	CAA	AAA	NonSyn	C175A	CA	2	7	1	7	0	0	0	Human	A	2.985888e-06	1.847504e-07	MF.9	0	1029525	C	C	L	HC	0.4507	0.4271	0
3503	27	Q	Q	177	A	G	CAA	CAG	Syn	A177G	AG	9	6	8	0	1.781114	0.6962803	2.951869	Human	A	1.14325e-05	8.091075e-07	MF.9	0.0003455624	1045236	S	C	N	HC	0.4507	0.4271	0
3504	27	Q	Q	177	A	G	CAA	CAG	Syn	A177G	AG	9	7	8	0	1.528495	0.7364605	2.330887	Human	B	1.213945e-05	3.148199e-07	MF.9	6.004708e-05	1077405	S	C	N	HC	0.4507	0.4271	0
3505	27	Q	Q	177	A	G	CAA	CAG	Syn	A177G	AG	9	2	8	0	0.7323745	0.5041598	0.8123657	Mosquito	A	1.210803e-05	6.184859e-07	MF.9	1.975943e-05	1109574	S	C	D	HC	0.4507	0.4271	0
3506	27	Q	Q	177	A	G	CAA	CAG	Syn	A177G	AG	9	3	8	0	1.01995	0.6095637	1.518819	Mosquito	B	1.180995e-05	6.889282e-07	MF.9	4.744083e-05	1141743	S	C	N	HC	0.4507	0.4271	0
3507	27	Q	R	176	A	G	CAA	CGA	NonSyn	A176G	AG	9	8	8	0	0.7488652	0.627396	0.8952133	Human	A	1.14325e-05	8.091075e-07	MF.9	2.509893e-05	1045235	C	C	D	HC	0.4507	0.4271	0
3508	27	Q	R	176	A	G	CAA	CGA	NonSyn	A176G	AG	9	9	8	0	0.8322139	0.6475979	1.05414	Human	B	1.213945e-05	3.148199e-07	MF.9	9.087494e-05	1077404	C	C	N	HC	0.4507	0.4271	0
3509	27	Q	R	176	A	G	CAA	CGA	NonSyn	A176G	AG	9	4	8	0	1.30427	0.3676853	1.994045	Mosquito	A	1.210803e-05	6.184859e-07	MF.9	0.0001133714	1109573	C	C	N	HC	0.4507	0.4271	0
3510	28	Q	H	180	G	C	CAG	CAC	NonSyn	G180C	GC	1	8	1	7	0.2199047	0	0.4398093	Human	A	3.700457e-06	2.674076e-07	MF.9	0	1036723	C	C	D	HC	0.3529	0.4302	0
3511	28	Q	H	180	G	C	CAG	CAC	NonSyn	G180C	GC	2	7	1	7	0	0	0	Mosquito	A	1.263716e-05	7.038203e-07	MF.9	0	1101061	C	C	L	HC	0.3529	0.4302	0
3512	28	Q	H	180	G	T	CAG	CAT	NonSyn	G180T	GT	9	9	8	0	0.9702055	0.8407078	1.631559	Mosquito	B	7.493022e-06	1.393832e-06	MF.9	0.0001249327	1149757	C	C	N	HC	0.3529	0.4302	0
3513	28	Q	K	178	C	A	CAG	AAG	NonSyn	C178A	CA	9	1	8	0	1.378307	0.4564328	2.509228	Human	A	2.985888e-06	1.847504e-07	MF.9	1.720652e-05	1029526	C	C	N	HC	0.3529	0.4302	0
3514	28	Q	L	179	A	T	CAG	CTG	NonSyn	A179T	AT	2	7	1	7	1.034748	0	2.069495	Human	A	2.37871e-06	1.833534e-07	MF.9	0	1053249	C	C	N	HC	0.3529	0.4302	0
3515	28	Q	P	179	A	C	CAG	CCG	NonSyn	A179C	AC	9	4	8	0	3.429908	0.6911006	6.168715	Human	A	2.326514e-06	2.040447e-07	MF.9	7.556194e-05	1036722	C	C	N	HC	0.3529	0.4302	0
3516	28	Q	P	179	A	C	CAG	CCG	NonSyn	A179C	AC	9	5	8	0	1.805072	0.6846082	2.943643	Mosquito	B	2.391816e-06	1.394774e-07	MF.9	8.11618e-05	1133229	C	C	N	HC	0.3529	0.4302	0
3517	28	Q	Q	180	G	A	CAG	CAA	Syn	G180A	GA	9	9	8	0	1.09757	0.7363097	1.43873	Human	A	6.69739e-06	4.668841e-07	MF.9	6.834709e-05	1029527	S	C	N	HC	0.3529	0.4302	0
3518	28	Q	Q	180	G	A	CAG	CAA	Syn	G180A	GA	9	8	8	0	1.127435	0.7828961	1.575134	Human	B	7.684204e-06	4.645403e-07	MF.9	0.0001027519	1061696	S	C	N	HC	0.3529	0.4302	0
3519	28	Q	Q	180	G	A	CAG	CAA	Syn	G180A	GA	9	3	8	0	1.226325	0.468499	2.113991	Mosquito	B	6.112924e-06	3.730988e-07	MF.9	3.331538e-05	1126034	S	C	N	HC	0.3529	0.4302	0
3520	28	Q	R	179	A	G	CAG	CGG	NonSyn	A179G	AG	9	9	8	0	0.5525994	0.4657359	0.9195898	Human	A	1.14325e-05	8.091075e-07	MF.9	6.222748e-05	1045238	C	C	D	HC	0.3529	0.4302	0
3521	28	Q	R	179	A	G	CAG	CGG	NonSyn	A179G	AG	9	9	8	0	0.8646447	0.7013461	1.021821	Human	B	1.213945e-05	3.148199e-07	MF.9	7.209979e-05	1077407	C	C	N	HC	0.3529	0.4302	0
3522	28	Q	R	179	A	G	CAG	CGG	NonSyn	A179G	AG	9	1	8	0	0.6015834	0.297638	1.056201	Mosquito	A	1.210803e-05	6.184859e-07	MF.9	1.550115e-05	1109576	C	C	N	HC	0.3529	0.4302	0
3523	28	Q	X	178	C	T	CAG	TAG	NonSyn	C178T	CT	9	9	8	0	0.6831285	0.2240629	1.153009	Human	A	0.0002554735	2.089311e-05	MF.9	0.0004215598	1053248	X	C	N	HC	0.3529	0.4302	0
3524	28	Q	X	178	C	T	CAG	TAG	NonSyn	C178T	CT	9	9	8	0	0.5366281	0.4542053	0.7368361	Human	B	0.0002635581	1.843403e-05	MF.9	0.0008388954	1085417	X	C	D	HC	0.3529	0.4302	0
3525	28	Q	X	178	C	T	CAG	TAG	NonSyn	C178T	CT	9	9	8	0	0.443869	0.3946067	0.4732704	Mosquito	B	0.0002034795	7.793136e-06	MF.9	0.0004001249	1149755	X	C	D	HC	0.3529	0.4302	0
3526	29	L	L	183	G	C	CTG	CTC	Syn	G183C	GC	1	8	1	7	0	0	0	Human	A	3.700457e-06	2.674076e-07	MF.9	4.895961e-06	1036725	S	C	L	HC	0.3494	0.4327	0
3527	29	L	L	183	G	T	CTG	CTT	Syn	G183T	GT	0	9	0	8	0	0	0	Human	A	5.90433e-06	1.997031e-07	MF.9	0	1053252	S	C	L	HC	0.3494	0.4327	0
3528	29	L	L	183	G	T	CTG	CTT	Syn	G183T	GT	1	8	0	8	0	0	0	Human	B	7.052585e-06	4.58263e-07	MF.9	0	1085421	S	C	L	HC	0.3494	0.4327	0
3529	29	L	L	183	G	C	CTG	CTC	Syn	G183C	GC	0	9	0	8	0	0	0	Mosquito	A	1.263716e-05	7.038203e-07	MF.9	0	1101063	S	C	L	HC	0.3494	0.4327	0
3530	29	L	L	183	G	T	CTG	CTT	Syn	G183T	GT	4	5	0	8	0	0	0	Mosquito	A	2.290083e-05	1.366303e-06	MF.9	0	1117590	S	C	L	HC	0.3494	0.4327	0
3531	29	L	L	183	G	C	CTG	CTC	Syn	G183C	GC	0	9	0	8	0	0	0	Mosquito	B	3.432927e-06	9.570197e-07	MF.9	0	1133232	S	C	L	HC	0.3494	0.4327	0
3532	29	L	P	182	T	C	CTG	CCG	NonSyn	T182C	TC	9	0	8	0	0.5265553	0.276645	0.7496777	Human	A	8.304354e-06	4.831455e-07	MF.9	9.580976e-06	1036724	C	C	D	HC	0.3494	0.4327	0
3533	29	L	P	182	T	C	CTG	CCG	NonSyn	T182C	TC	8	1	8	0	0.7303727	0.4449946	0.856617	Human	B	8.638697e-06	3.744363e-07	MF.9	1.253801e-05	1068893	C	C	D	HC	0.3494	0.4327	0
3534	29	L	R	182	T	G	CTG	CGG	NonSyn	T182G	TG	1	8	1	7	0	0	0	Human	A	1.799189e-06	1.556942e-07	MF.9	0	1045240	C	C	L	HC	0.3494	0.4327	0
3535	29	L	V	181	C	G	CTG	GTG	NonSyn	C181G	CG	0	9	0	8	0	0	0	Human	A	1.604509e-06	2.564144e-07	MF.9	0	1045239	C	C	L	HC	0.3494	0.4327	0
3536	29	L	V	181	C	G	CTG	GTG	NonSyn	C181G	CG	0	9	0	8	0	0	0	Human	B	1.455268e-06	7.022105e-08	MF.9	0	1077408	C	C	L	HC	0.3494	0.4327	0
3537	29	L	V	181	C	G	CTG	GTG	NonSyn	C181G	CG	1	8	1	7	0	0	1.891037	Mosquito	A	2.20927e-06	9.740866e-08	MF.9	0	1109577	C	C	N	HC	0.3494	0.4327	0
3538	29	L	V	181	C	G	CTG	GTG	NonSyn	C181G	CG	0	9	0	8	0	0	0	Mosquito	B	1.513275e-06	1.225367e-07	MF.9	0	1141746	C	C	L	HC	0.3494	0.4327	0
3539	30	T	A	184	A	G	ACA	GCA	NonSyn	A184G	AG	9	8	8	0	1.055052	0.6223424	1.351135	Human	A	1.14325e-05	8.091075e-07	MF.9	0.0001757751	1045241	C	C	N	HC	0.3460	0.4276	0
3540	30	T	A	184	A	G	ACA	GCA	NonSyn	A184G	AG	9	9	8	0	1.070869	0.8629411	1.160289	Human	B	1.213945e-05	3.148199e-07	MF.9	0.0003229405	1077410	C	C	N	HC	0.3460	0.4276	0
3541	30	T	A	184	A	G	ACA	GCA	NonSyn	A184G	AG	8	6	8	0	0.841748	0.624749	1.275746	Mosquito	A	1.210803e-05	6.184859e-07	MF.9	0.0001795352	1109579	C	C	N	HC	0.3460	0.4276	0
3542	30	T	A	184	A	G	ACA	GCA	NonSyn	A184G	AG	9	7	8	0	1.357972	0.8155381	1.900406	Mosquito	B	1.180995e-05	6.889282e-07	MF.9	0.0001057072	1141748	C	C	N	HC	0.3460	0.4276	0
3543	30	T	I	185	C	T	ACA	ATA	NonSyn	C185T	CT	9	9	8	0	0.4218089	0.2976125	0.6736296	Mosquito	B	0.0002034795	7.793136e-06	MF.9	0.0004676798	1149761	NC	C	D	HC	0.3460	0.4276	0
3544	30	T	K	185	C	A	ACA	AAA	NonSyn	C185A	CA	2	7	1	7	0	0	0	Mosquito	A	6.508077e-06	1.996644e-07	MF.9	0	1093869	C	C	L	HC	0.3460	0.4276	0
3545	30	T	P	184	A	C	ACA	CCA	NonSyn	A184C	AC	9	5	8	0	2.285254	0.2360289	4.337189	Mosquito	A	3.286083e-06	1.701643e-07	MF.9	0.0001849756	1101064	NC	C	N	HC	0.3460	0.4276	0
3546	30	T	R	185	C	G	ACA	AGA	NonSyn	C185G	CG	9	3	8	0	1.156801	0.5336987	1.699634	Mosquito	B	1.513275e-06	1.225367e-07	MF.9	2.598221e-05	1141749	C	C	N	HC	0.3460	0.4276	0
3547	30	T	T	186	A	C	ACA	ACC	Syn	A186C	AC	2	7	1	7	0	0	1.819816	Human	A	2.326514e-06	2.040447e-07	MF.9	0	1036727	S	C	N	HC	0.3460	0.4276	0
3548	30	T	T	186	A	G	ACA	ACG	Syn	A186G	AG	9	5	8	0	1.100797	0.1959089	1.940348	Human	B	1.213945e-05	3.148199e-07	MF.9	4.693321e-05	1077412	S	C	N	HC	0.3460	0.4276	0
3549	30	T	T	186	A	G	ACA	ACG	Syn	A186G	AG	9	6	8	0	1.394439	0.4145099	3.779013	Mosquito	A	1.210803e-05	6.184859e-07	MF.9	0.0005593639	1109581	S	C	N	HC	0.3460	0.4276	0
3550	30	T	T	186	A	T	ACA	ACT	Syn	A186T	AT	1	8	1	7	0	0	2.967586	Mosquito	A	2.875636e-06	1.187371e-07	MF.9	0	1117593	S	C	N	HC	0.3460	0.4276	0
3551	31	K	M	188	A	T	AAG	ATG	NonSyn	A188T	AT	9	1	8	0	1.259807	0.2533809	1.543509	Human	B	2.589251e-06	1.43343e-07	MF.9	5.881972e-06	1085426	C	C	N	HC	0.3426	0.4216	0
3552	31	K	N	189	G	C	AAG	AAC	NonSyn	G189C	GC	9	0	8	0	0.6556802	0.3445719	1.125851	Human	A	3.700457e-06	2.674076e-07	MF.9	5.5198e-06	1036730	C	C	N	HC	0.3426	0.4216	0
3553	31	K	R	188	A	G	AAG	AGG	NonSyn	A188G	AG	7	2	0	8	0	0	0	Human	B	1.213945e-05	3.148199e-07	MF.9	5.881972e-06	1077414	C	C	L	HC	0.3426	0.4216	0
3554	31	K	R	188	A	G	AAG	AGG	NonSyn	A188G	AG	5	4	1	7	0.07594717	0	0.1898679	Mosquito	A	1.210803e-05	6.184859e-07	MF.9	5.619682e-06	1109583	C	C	D	HC	0.3426	0.4216	0
3555	31	K	T	188	A	C	AAG	ACG	NonSyn	A188C	AC	9	6	8	0	0.9850812	0.3543369	1.321805	Human	A	2.326514e-06	2.040447e-07	MF.9	3.305039e-05	1036729	C	C	N	HC	0.3426	0.4216	0
3556	31	K	T	188	A	C	AAG	ACG	NonSyn	A188C	AC	9	6	8	0	1.117295	0.9246696	1.502332	Human	B	2.288044e-06	1.737362e-07	MF.9	8.234761e-05	1068898	C	C	N	HC	0.3426	0.4216	0
3557	31	K	T	188	A	C	AAG	ACG	NonSyn	A188C	AC	1	8	1	7	0.4361878	0	1.090469	Mosquito	A	3.286083e-06	1.701643e-07	MF.9	0	1101067	C	C	N	HC	0.3426	0.4216	0
3558	31	K	X	187	A	T	AAG	TAG	NonSyn	A187T	AT	0	9	0	8	0	0	0	Human	A	2.37871e-06	1.833534e-07	MF.9	0	1053256	X	C	L	HC	0.3426	0.4216	0
3559	31	K	X	187	A	T	AAG	TAG	NonSyn	A187T	AT	1	8	1	7	0.3249765	0	0.6499529	Human	B	2.589251e-06	1.43343e-07	MF.9	0	1085425	X	C	D	HC	0.3426	0.4216	0
3560	31	K	X	187	A	T	AAG	TAG	NonSyn	A187T	AT	0	9	0	8	0	0	0	Mosquito	A	2.875636e-06	1.187371e-07	MF.9	0	1117594	X	C	L	HC	0.3426	0.4216	0
3561	31	K	X	187	A	T	AAG	TAG	NonSyn	A187T	AT	0	9	0	8	0	0	0	Mosquito	B	2.369747e-06	1.784832e-07	MF.9	0	1149763	X	C	L	HC	0.3426	0.4216	0
3562	32	R	G	190	A	G	AGA	GGA	NonSyn	A190G	AG	5	4	0	8	0	0	0	Human	B	1.213945e-05	3.148199e-07	MF.9	0	1077415	C	C	L	HC	0.3249	0.4142	0
3563	32	R	G	190	A	G	AGA	GGA	NonSyn	A190G	AG	4	5	1	7	0.0646807	0	0.1293614	Mosquito	B	1.180995e-05	6.889282e-07	MF.9	6.996921e-06	1141753	C	C	D	HC	0.3249	0.4142	0
3564	32	R	K	191	G	A	AGA	AAA	NonSyn	G191A	GA	9	1	8	0	0.6818024	0.2141664	1.00373	Human	B	7.684204e-06	4.645403e-07	MF.9	2.37431e-05	1061702	C	C	N	HC	0.3249	0.4142	0
3565	32	R	K	191	G	A	AGA	AAA	NonSyn	G191A	GA	1	8	0	8	0	0	0	Mosquito	A	8.774931e-06	2.38219e-07	MF.9	0	1093871	C	C	L	HC	0.3249	0.4142	0
3566	32	R	R	192	A	G	AGA	AGG	Syn	A192G	AG	4	5	1	7	0	0	0	Human	A	1.14325e-05	8.091075e-07	MF.9	5.923153e-06	1045247	S	C	L	HC	0.3249	0.4142	0
3567	32	R	R	192	A	G	AGA	AGG	Syn	A192G	AG	3	6	1	7	0.07682444	0	0.1920611	Mosquito	A	1.210803e-05	6.184859e-07	MF.9	0	1109585	S	C	D	HC	0.3249	0.4142	0
3568	32	R	R	190	A	C	AGA	CGA	Syn	A190C	AC	1	8	1	7	0.630722	0	1.576805	Mosquito	B	2.391816e-06	1.394774e-07	MF.9	0	1133238	S	C	N	HC	0.3249	0.4142	0
3569	32	R	S	192	A	T	AGA	AGT	NonSyn	A192T	AT	0	9	0	8	0	0	0	Human	B	2.589251e-06	1.43343e-07	MF.9	0	1085430	NC	C	L	HC	0.3249	0.4142	0
3570	32	R	S	192	A	C	AGA	AGC	NonSyn	A192C	AC	1	8	1	7	0.4428361	0	1.10709	Mosquito	A	3.286083e-06	1.701643e-07	MF.9	0	1101071	NC	C	N	HC	0.3249	0.4142	0
3571	32	R	S	192	A	T	AGA	AGT	NonSyn	A192T	AT	1	8	1	7	0	0	0	Mosquito	A	2.875636e-06	1.187371e-07	MF.9	0	1117599	NC	C	L	HC	0.3249	0.4142	0
3572	32	R	S	192	A	T	AGA	AGT	NonSyn	A192T	AT	1	8	1	7	0	0	0	Mosquito	B	2.369747e-06	1.784832e-07	MF.9	0	1149768	NC	C	L	HC	0.3249	0.4142	0
3573	32	R	X	190	A	T	AGA	TGA	NonSyn	A190T	AT	9	3	8	0	2.446619	0.2461734	5.350845	Human	B	2.589251e-06	1.43343e-07	MF.9	1.203934e-05	1085428	X	C	N	HC	0.3249	0.4142	0
3574	32	R	X	190	A	T	AGA	TGA	NonSyn	A190T	AT	1	8	1	7	0	0	0	Mosquito	A	2.875636e-06	1.187371e-07	MF.9	0	1117597	X	C	L	HC	0.3249	0.4142	0
3575	32	R	X	190	A	T	AGA	TGA	NonSyn	A190T	AT	9	3	8	0	4.124628	0.1991238	6.622181	Mosquito	B	2.369747e-06	1.784832e-07	MF.9	3.498461e-05	1149766	X	C	N	HC	0.3249	0.4142	0
3576	33	F	C	194	T	G	TTC	TGC	NonSyn	T194G	TG	1	8	1	7	0.4813793	0	1.203448	Human	A	1.799189e-06	1.556942e-07	MF.9	0	1045249	NC	C	N	HC	0.3426	0.4080	0
3577	33	F	C	194	T	G	TTC	TGC	NonSyn	T194G	TG	1	8	1	7	0	0	0	Human	B	1.80746e-06	1.143024e-07	MF.9	0	1077418	NC	C	L	HC	0.3426	0.4080	0
3578	33	F	C	194	T	G	TTC	TGC	NonSyn	T194G	TG	0	9	0	8	0	0	0	Mosquito	A	3.486291e-06	1.611304e-07	MF.9	0	1109587	NC	C	L	HC	0.3426	0.4080	0
3579	33	F	C	194	T	G	TTC	TGC	NonSyn	T194G	TG	0	9	0	8	0	0	0	Mosquito	B	2.030327e-06	1.119074e-07	MF.9	0	1141756	NC	C	L	HC	0.3426	0.4080	0
3580	33	F	L	195	C	A	TTC	TTA	NonSyn	C195A	CA	1	8	1	7	0.1668929	0	0.4172323	Human	A	2.985888e-06	1.847504e-07	MF.9	0	1029536	C	C	D	HC	0.3426	0.4080	0
3581	33	F	L	193	T	C	TTC	CTC	NonSyn	T193C	TC	9	6	8	0	1.003672	0.6979187	2.494234	Human	A	8.304354e-06	4.831455e-07	MF.9	8.066818e-05	1036734	C	C	N	HC	0.3426	0.4080	0
3582	33	F	L	195	C	A	TTC	TTA	NonSyn	C195A	CA	2	7	1	7	0	0	4.40232	Human	B	3.57888e-06	4.588673e-07	MF.9	0	1061705	C	C	N	HC	0.3426	0.4080	0
3583	33	F	L	193	T	C	TTC	CTC	NonSyn	T193C	TC	9	5	8	0	0.8125005	0.5680522	1.105837	Human	B	8.638697e-06	3.744363e-07	MF.9	4.288743e-05	1068903	C	C	N	HC	0.3426	0.4080	0
3584	33	F	L	195	C	A	TTC	TTA	NonSyn	C195A	CA	1	8	1	7	0.1660048	0	0.415012	Mosquito	A	6.508077e-06	1.996644e-07	MF.9	0	1093874	C	C	D	HC	0.3426	0.4080	0
3585	33	F	L	195	C	G	TTC	TTG	NonSyn	C195G	CG	0	9	0	8	0	0	0	Mosquito	A	2.20927e-06	9.740866e-08	MF.9	0	1109588	C	C	L	HC	0.3426	0.4080	0
3586	33	F	L	193	T	C	TTC	CTC	NonSyn	T193C	TC	9	2	8	0	1.647697	0.5216781	2.673123	Mosquito	B	8.756502e-06	5.645669e-07	MF.9	4.49312e-05	1133241	C	C	N	HC	0.3426	0.4080	0
3587	33	F	L	195	C	G	TTC	TTG	NonSyn	C195G	CG	1	8	1	7	0	0	0	Mosquito	B	1.513275e-06	1.225367e-07	MF.9	7.50317e-06	1141757	C	C	L	HC	0.3426	0.4080	0
3588	33	F	S	194	T	C	TTC	TCC	NonSyn	T194C	TC	5	4	0	8	0	0	0	Mosquito	A	1.724887e-05	1.124953e-06	MF.9	6.049534e-06	1101073	NC	C	L	HC	0.3426	0.4080	0
3589	33	F	V	193	T	G	TTC	GTC	NonSyn	T193G	TG	1	8	1	7	0	0	0	Mosquito	A	3.486291e-06	1.611304e-07	MF.9	0	1109586	NC	C	L	HC	0.3426	0.4080	0
3590	33	F	Y	194	T	A	TTC	TAC	NonSyn	T194A	TA	3	6	1	7	0	0	0.3100683	Mosquito	A	7.166782e-06	3.393327e-07	MF.9	6.049534e-06	1093873	C	C	D	HC	0.3426	0.4080	0
3591	34	S	A	196	T	G	TCA	GCA	NonSyn	T196G	TG	2	7	1	7	0	0	0	Human	A	1.799189e-06	1.556942e-07	MF.9	0	1045251	C	C	L	HC	0.3286	0.4048	0
3592	34	S	A	196	T	G	TCA	GCA	NonSyn	T196G	TG	1	8	1	7	0.7206043	0	1.801511	Human	B	1.80746e-06	1.143024e-07	MF.9	0	1077420	C	C	N	HC	0.3286	0.4048	0
3593	34	S	A	196	T	G	TCA	GCA	NonSyn	T196G	TG	1	8	1	7	0	0	0	Mosquito	A	3.486291e-06	1.611304e-07	MF.9	0	1109589	C	C	L	HC	0.3286	0.4048	0
3594	34	S	A	196	T	G	TCA	GCA	NonSyn	T196G	TG	1	8	1	7	0	0	4.907352	Mosquito	B	2.030327e-06	1.119074e-07	MF.9	0	1141758	C	C	N	HC	0.3286	0.4048	0
3595	34	S	L	197	C	T	TCA	TTA	NonSyn	C197T	CT	9	9	8	0	0.4288892	0.06893056	0.8184229	Mosquito	A	0.0001578562	6.997471e-06	MF.9	0.000216874	1117601	NC	C	D	HC	0.3286	0.4048	0
3596	34	S	P	196	T	C	TCA	CCA	NonSyn	T196C	TC	9	2	8	0	1.22139	0.2369923	2.236849	Human	A	8.304354e-06	4.831455e-07	MF.9	6.587572e-05	1036736	C	C	N	HC	0.3286	0.4048	0
3597	34	S	P	196	T	C	TCA	CCA	NonSyn	T196C	TC	9	1	8	0	0.6279497	0.4643137	0.76961	Human	B	8.638697e-06	3.744363e-07	MF.9	2.910327e-05	1068905	C	C	D	HC	0.3286	0.4048	0
3598	34	S	S	198	A	G	TCA	TCG	Syn	A198G	AG	9	9	8	0	0.9141528	0.6036132	1.535232	Human	A	1.14325e-05	8.091075e-07	MF.9	0.00015818	1045253	S	C	N	HC	0.3286	0.4048	0
3599	34	S	S	198	A	C	TCA	TCC	Syn	A198C	AC	0	9	0	8	0	0	0	Human	B	2.288044e-06	1.737362e-07	MF.9	0	1068906	S	C	L	HC	0.3286	0.4048	0
3600	34	S	S	198	A	C	TCA	TCC	Syn	A198C	AC	1	8	0	8	0	0	0	Mosquito	A	3.286083e-06	1.701643e-07	MF.9	0	1101075	S	C	L	HC	0.3286	0.4048	0
3601	34	S	S	198	A	G	TCA	TCG	Syn	A198G	AG	8	7	8	0	1.454913	0.7287472	2.078259	Mosquito	A	1.210803e-05	6.184859e-07	MF.9	0.0002033646	1109591	S	C	N	HC	0.3286	0.4048	0
3602	34	S	S	198	A	T	TCA	TCT	Syn	A198T	AT	0	9	0	8	0	0	0	Mosquito	A	2.875636e-06	1.187371e-07	MF.9	0	1117602	S	C	L	HC	0.3286	0.4048	0
3603	34	S	S	198	A	C	TCA	TCC	Syn	A198C	AC	1	8	1	7	0	0	0	Mosquito	B	2.391816e-06	1.394774e-07	MF.9	4.098932e-06	1133244	S	C	L	HC	0.3286	0.4048	0
3604	34	S	S	198	A	G	TCA	TCG	Syn	A198G	AG	9	5	8	0	1.336521	0.5084236	2.055308	Mosquito	B	1.180995e-05	6.889282e-07	MF.9	0.0001639573	1141760	S	C	N	HC	0.3286	0.4048	0
3605	34	S	X	197	C	G	TCA	TGA	NonSyn	C197G	CG	1	8	1	7	0	0	0	Mosquito	B	1.513275e-06	1.225367e-07	MF.9	0	1141759	X	C	L	HC	0.3286	0.4048	0
3606	35	L	F	199	C	T	CTT	TTT	NonSyn	C199T	CT	9	9	8	0	0.6763254	0.4038068	0.9814917	Human	A	0.0002554735	2.089311e-05	MF.9	0.0005073663	1053265	C	C	D	HC	0.3392	0.4005	0
3607	35	L	F	199	C	T	CTT	TTT	NonSyn	C199T	CT	9	9	8	0	0.582926	0.417329	0.7216893	Human	B	0.0002635581	1.843403e-05	MF.9	0.0006874354	1085434	C	C	D	HC	0.3392	0.4005	0
3608	35	L	F	199	C	T	CTT	TTT	NonSyn	C199T	CT	9	9	8	0	0.677496	0.3222638	1.026854	Mosquito	A	0.0001578562	6.997471e-06	MF.9	0.0003721243	1117603	C	C	N	HC	0.3392	0.4005	0
3609	35	L	F	199	C	T	CTT	TTT	NonSyn	C199T	CT	9	9	8	0	0.6092087	0.5007657	0.6732778	Mosquito	B	0.0002034795	7.793136e-06	MF.9	0.0004266357	1149772	C	C	D	HC	0.3392	0.4005	0
3610	35	L	I	199	C	A	CTT	ATT	NonSyn	C199A	CA	8	1	8	0	1.318856	0.4567472	2.199503	Mosquito	A	6.508077e-06	1.996644e-07	MF.9	1.800601e-05	1093877	C	C	N	HC	0.3392	0.4005	0
3611	35	L	L	201	T	C	CTT	CTC	Syn	T201C	TC	9	7	8	0	1.135014	0.8080958	3.429897	Human	A	8.304354e-06	4.831455e-07	MF.9	9.934186e-05	1036739	S	C	N	HC	0.3392	0.4005	0
3612	35	L	L	201	T	G	CTT	CTG	Syn	T201G	TG	1	8	1	7	0	0	0.8397475	Human	A	1.799189e-06	1.556942e-07	MF.9	0	1045256	S	C	D	HC	0.3392	0.4005	0
3613	35	L	L	201	T	C	CTT	CTC	Syn	T201C	TC	9	7	8	0	1.336816	0.8652719	1.516871	Human	B	8.638697e-06	3.744363e-07	MF.9	0.0003266855	1068908	S	C	N	HC	0.3392	0.4005	0
3614	35	L	L	201	T	C	CTT	CTC	Syn	T201C	TC	9	6	8	0	1.2542	0.6188712	1.756569	Mosquito	B	8.756502e-06	5.645669e-07	MF.9	0.0003133089	1133246	S	C	N	HC	0.3392	0.4005	0
3615	35	L	P	200	T	C	CTT	CCT	NonSyn	T200C	TC	9	2	8	0	0.9647666	0.3706331	2.442903	Mosquito	B	8.756502e-06	5.645669e-07	MF.9	3.800417e-05	1133245	C	C	N	HC	0.3392	0.4005	0
3616	35	L	V	199	C	G	CTT	GTT	NonSyn	C199G	CG	1	8	0	8	0	0	0	Human	B	1.455268e-06	7.022105e-08	MF.9	0	1077423	C	C	L	HC	0.3392	0.4005	0
3617	35	L	V	199	C	G	CTT	GTT	NonSyn	C199G	CG	0	9	0	8	0	0	0	Mosquito	B	1.513275e-06	1.225367e-07	MF.9	0	1141761	C	C	L	HC	0.3392	0.4005	0
3618	36	G	A	203	G	C	GGA	GCA	NonSyn	G203C	GC	1	8	1	7	0.0691995	0	0.1729987	Human	A	3.700457e-06	2.674076e-07	MF.9	0	1036741	C	C	D	HC	0.2503	0.3983	0
3619	36	G	G	204	A	T	GGA	GGT	Syn	A204T	AT	1	8	1	7	0	0	0	Human	B	2.589251e-06	1.43343e-07	MF.9	0	1085437	S	C	L	HC	0.2503	0.3983	0
3620	36	G	G	204	A	C	GGA	GGC	Syn	A204C	AC	0	9	0	8	0	0	0	Mosquito	B	2.391816e-06	1.394774e-07	MF.9	0	1133249	S	C	L	HC	0.2503	0.3983	0
3621	36	G	G	204	A	T	GGA	GGT	Syn	A204T	AT	1	8	1	7	0	0	0	Mosquito	B	2.369747e-06	1.784832e-07	MF.9	0	1149775	S	C	L	HC	0.2503	0.3983	0
3622	36	G	X	202	G	T	GGA	TGA	NonSyn	G202T	GT	3	6	1	7	0	0	0	Human	A	5.90433e-06	1.997031e-07	MF.9	0	1053266	X	C	L	HC	0.2503	0.3983	0
3623	37	M	I	207	G	T	ATG	ATT	NonSyn	G207T	GT	9	0	8	0	0.7149692	0.2741076	1.127387	Human	B	7.052585e-06	4.58263e-07	MF.9	1.914306e-05	1085439	C	C	N	HC	0.2193	0.3931	0
3624	37	M	K	206	T	A	ATG	AAG	NonSyn	T206A	TA	9	1	8	0	0.8841326	0.3483106	1.382086	Mosquito	B	4.312763e-06	3.05777e-07	MF.9	3.080537e-05	1126051	C	C	N	HC	0.2193	0.3931	0
3625	37	M	L	205	A	C	ATG	CTG	NonSyn	A205C	AC	2	7	1	7	0	0	0	Human	B	2.288044e-06	1.737362e-07	MF.9	4.916735e-06	1068912	C	C	L	HC	0.2193	0.3931	0
3626	37	M	L	205	A	T	ATG	TTG	NonSyn	A205T	AT	9	7	8	0	0.8310289	0.1315588	19.31942	Human	B	2.589251e-06	1.43343e-07	MF.9	0.0003982555	1085438	C	C	N	HC	0.2193	0.3931	0
3627	37	M	L	205	A	C	ATG	CTG	NonSyn	A205C	AC	2	7	1	7	0.8377545	0	2.094386	Mosquito	A	3.286083e-06	1.701643e-07	MF.9	0	1101081	C	C	N	HC	0.2193	0.3931	0
3628	37	M	L	205	A	T	ATG	TTG	NonSyn	A205T	AT	9	9	8	0	0.8716255	0.7552847	1.286717	Mosquito	B	2.369747e-06	1.784832e-07	MF.9	0.000160407	1149776	C	C	N	HC	0.2193	0.3931	0
3629	37	M	R	206	T	G	ATG	AGG	NonSyn	T206G	TG	9	0	8	0	1.297649	0.4340696	1.88649	Human	A	1.799189e-06	1.556942e-07	MF.9	1.281008e-05	1045259	C	C	N	HC	0.2193	0.3931	0
3630	37	M	R	206	T	G	ATG	AGG	NonSyn	T206G	TG	9	0	8	0	0.9558488	0.4821519	1.501163	Mosquito	B	2.030327e-06	1.119074e-07	MF.9	1.540268e-05	1141766	C	C	N	HC	0.2193	0.3931	0
3631	37	M	T	206	T	C	ATG	ACG	NonSyn	T206C	TC	9	6	8	0	1.501951	0.4674876	2.36669	Human	A	8.304354e-06	4.831455e-07	MF.9	9.607563e-05	1036744	C	C	N	HC	0.2193	0.3931	0
3632	37	M	T	206	T	C	ATG	ACG	NonSyn	T206C	TC	9	6	8	0	1.260839	0.5992487	1.697532	Mosquito	B	8.756502e-06	5.645669e-07	MF.9	0.0009896224	1133251	C	C	N	HC	0.2193	0.3931	0
3633	37	M	V	205	A	G	ATG	GTG	NonSyn	A205G	AG	9	2	8	0	0.6149406	0.3997901	1.032617	Human	B	1.213945e-05	3.148199e-07	MF.9	1.966694e-05	1077427	C	C	N	HC	0.2193	0.3931	0
3634	37	M	V	205	A	G	ATG	GTG	NonSyn	A205G	AG	9	2	8	0	1.308212	0.852557	1.856922	Mosquito	B	1.180995e-05	6.889282e-07	MF.9	1.909607e-05	1141765	C	C	N	HC	0.2193	0.3931	0
3635	38	L	L	210	G	A	CTG	CTA	Syn	G210A	GA	9	5	8	0	2.303169	0.5029208	3.673262	Human	A	6.69739e-06	4.668841e-07	MF.9	3.284245e-05	1029548	S	C	N	HC	0.1759	0.3921	0
3636	38	L	L	210	G	A	CTG	CTA	Syn	G210A	GA	9	3	8	0	1.503855	0.4464454	2.836232	Mosquito	A	8.774931e-06	2.38219e-07	MF.9	7.752639e-05	1093886	S	C	N	HC	0.1759	0.3921	0
3637	38	L	L	210	G	A	CTG	CTA	Syn	G210A	GA	9	1	8	0	0.9883185	0.4926882	1.752867	Mosquito	B	6.112924e-06	3.730988e-07	MF.9	1.511419e-05	1126055	S	C	N	HC	0.1759	0.3921	0
3638	38	L	P	209	T	C	CTG	CCG	NonSyn	T209C	TC	9	5	8	0	1.826519	0.4521106	2.788207	Mosquito	A	1.724887e-05	1.124953e-06	MF.9	0.0001724435	1101084	C	C	N	HC	0.1759	0.3921	0
3639	38	L	P	209	T	C	CTG	CCG	NonSyn	T209C	TC	9	6	8	0	1.061705	0.4623225	1.753229	Mosquito	B	8.756502e-06	5.645669e-07	MF.9	8.656998e-05	1133253	C	C	N	HC	0.1759	0.3921	0
3640	38	L	V	208	C	G	CTG	GTG	NonSyn	C208G	CG	0	9	0	8	0	0	0	Mosquito	A	2.20927e-06	9.740866e-08	MF.9	0	1109598	C	C	L	HC	0.1759	0.3921	0
3641	39	Q	E	211	C	G	CAG	GAG	NonSyn	C211G	CG	1	8	1	7	0.6134703	0	1.533676	Human	B	1.455268e-06	7.022105e-08	MF.9	0	1077431	C	C	N	HC	0.1424	0.3952	0
3642	39	Q	E	211	C	G	CAG	GAG	NonSyn	C211G	CG	0	9	0	8	0	0	0	Mosquito	A	2.20927e-06	9.740866e-08	MF.9	0	1109600	C	C	L	HC	0.1424	0.3952	0
3643	39	Q	E	211	C	G	CAG	GAG	NonSyn	C211G	CG	0	9	0	8	0	0	0	Mosquito	B	1.513275e-06	1.225367e-07	MF.9	0	1141769	C	C	L	HC	0.1424	0.3952	0
3644	39	Q	H	213	G	T	CAG	CAT	NonSyn	G213T	GT	7	2	1	7	0	0	0	Mosquito	A	2.290083e-05	1.366303e-06	MF.9	3.443668e-05	1117613	C	C	L	HC	0.1424	0.3952	0
3645	39	Q	H	213	G	C	CAG	CAC	NonSyn	G213C	GC	2	7	1	7	0	0	0	Mosquito	B	3.432927e-06	9.570197e-07	MF.9	3.903124e-06	1133256	C	C	L	HC	0.1424	0.3952	0
3646	39	Q	K	211	C	A	CAG	AAG	NonSyn	C211A	CA	9	1	8	0	1.073413	0.3693559	1.440418	Human	A	2.985888e-06	1.847504e-07	MF.9	1.958583e-05	1029549	C	C	N	HC	0.1424	0.3952	0
3647	39	Q	K	211	C	A	CAG	AAG	NonSyn	C211A	CA	9	3	8	0	1.473761	0.8228797	2.331704	Human	B	3.57888e-06	4.588673e-07	MF.9	2.794623e-05	1061718	C	C	N	HC	0.1424	0.3952	0
3648	39	Q	P	212	A	C	CAG	CCG	NonSyn	A212C	AC	1	8	1	7	0	0	0	Mosquito	B	2.391816e-06	1.394774e-07	MF.9	0	1133255	C	C	L	HC	0.1424	0.3952	0
3649	39	Q	Q	213	G	A	CAG	CAA	Syn	G213A	GA	9	4	8	0	2.705187	0.2150243	5.19535	Human	A	6.69739e-06	4.668841e-07	MF.9	2.768722e-05	1029550	S	C	N	HC	0.1424	0.3952	0
3650	39	Q	Q	213	G	A	CAG	CAA	Syn	G213A	GA	9	3	8	0	1.519147	0.4141977	2.682655	Mosquito	B	6.112924e-06	3.730988e-07	MF.9	8.586874e-05	1126057	S	C	N	HC	0.1424	0.3952	0
3651	39	Q	R	212	A	G	CAG	CGG	NonSyn	A212G	AG	9	9	8	0	1.013352	0.5273686	1.388642	Human	A	1.14325e-05	8.091075e-07	MF.9	9.960622e-05	1045263	C	C	N	HC	0.1424	0.3952	0
3652	39	Q	R	212	A	G	CAG	CGG	NonSyn	A212G	AG	9	6	8	0	0.8797038	0.5104161	1.454696	Human	B	1.213945e-05	3.148199e-07	MF.9	0.000155739	1077432	C	C	N	HC	0.1424	0.3952	0
3653	39	Q	R	212	A	G	CAG	CGG	NonSyn	A212G	AG	9	8	8	0	0.9531896	0.5554048	1.747226	Mosquito	A	1.210803e-05	6.184859e-07	MF.9	5.511768e-05	1109601	C	C	N	HC	0.1424	0.3952	0
3654	39	Q	R	212	A	G	CAG	CGG	NonSyn	A212G	AG	9	3	8	0	1.00336	0.4556378	1.336857	Mosquito	B	1.180995e-05	6.889282e-07	MF.9	6.215282e-05	1141770	C	C	N	HC	0.1424	0.3952	0
3655	40	G	E	215	G	A	GGA	GAA	NonSyn	G215A	GA	9	4	8	0	1.772175	0.8257478	2.806593	Human	A	6.69739e-06	4.668841e-07	MF.9	2.315672e-05	1029552	C	C	N	HC	0.1449	0.3967	0
3656	40	G	E	215	G	A	GGA	GAA	NonSyn	G215A	GA	9	6	8	0	0.3856399	0.2540602	1.74189	Human	B	7.684204e-06	4.645403e-07	MF.9	4.869521e-05	1061721	C	C	N	HC	0.1449	0.3967	0
3657	40	G	G	216	A	G	GGA	GGG	Syn	A216G	AG	9	7	8	0	0.8115987	0.5165222	1.059142	Human	A	1.14325e-05	8.091075e-07	MF.9	4.732608e-05	1045264	S	C	N	HC	0.1449	0.3967	0
3658	40	G	G	216	A	T	GGA	GGT	Syn	A216T	AT	1	8	1	7	0.4361946	0	1.090487	Human	A	2.37871e-06	1.833534e-07	MF.9	0	1053278	S	C	N	HC	0.1449	0.3967	0
3659	40	G	G	216	A	G	GGA	GGG	Syn	A216G	AG	9	9	8	0	0.7081496	0.4585743	1.032829	Human	B	1.213945e-05	3.148199e-07	MF.9	8.970897e-05	1077433	S	C	N	HC	0.1449	0.3967	0
3660	40	G	G	216	A	T	GGA	GGT	Syn	A216T	AT	0	9	0	8	0	0	0	Mosquito	A	2.875636e-06	1.187371e-07	MF.9	0	1117616	S	C	L	HC	0.1449	0.3967	0
3661	40	G	G	216	A	G	GGA	GGG	Syn	A216G	AG	9	9	8	0	0.855013	0.7353411	1.415224	Mosquito	B	1.180995e-05	6.889282e-07	MF.9	0.0001613768	1141771	S	C	N	HC	0.1449	0.3967	0
3662	40	G	G	216	A	T	GGA	GGT	Syn	A216T	AT	0	9	0	8	0	0	0	Mosquito	B	2.369747e-06	1.784832e-07	MF.9	0	1149785	S	C	L	HC	0.1449	0.3967	0
3663	40	G	R	214	G	A	GGA	AGA	NonSyn	G214A	GA	9	3	8	0	1.017457	0.2884155	2.113636	Human	A	6.69739e-06	4.668841e-07	MF.9	5.201792e-05	1029551	C	C	N	HC	0.1449	0.3967	0
3664	40	G	R	214	G	A	GGA	AGA	NonSyn	G214A	GA	9	3	8	0	0.9378551	0.649494	1.436603	Human	B	7.684204e-06	4.645403e-07	MF.9	1.974149e-05	1061720	C	C	N	HC	0.1449	0.3967	0
3665	40	G	R	214	G	A	GGA	AGA	NonSyn	G214A	GA	9	3	8	0	1.413246	0.4131633	2.761549	Mosquito	B	6.112924e-06	3.730988e-07	MF.9	8.933321e-05	1126058	C	C	N	HC	0.1449	0.3967	0
3666	40	G	R	214	G	C	GGA	CGA	NonSyn	G214C	GC	2	7	1	7	0	0	0	Mosquito	B	3.432927e-06	9.570197e-07	MF.9	8.121201e-06	1133257	C	C	L	HC	0.1449	0.3967	0
3667	40	G	V	215	G	T	GGA	GTA	NonSyn	G215T	GT	2	7	1	7	0	0	0	Human	A	5.90433e-06	1.997031e-07	MF.9	0	1053277	NC	C	L	HC	0.1449	0.3967	0
3668	40	G	V	215	G	T	GGA	GTA	NonSyn	G215T	GT	3	6	0	8	0	0	0	Mosquito	A	2.290083e-05	1.366303e-06	MF.9	1.517416e-05	1117615	NC	C	L	HC	0.1449	0.3967	0
3669	40	G	V	215	G	T	GGA	GTA	NonSyn	G215T	GT	2	7	1	7	0	0	0	Mosquito	B	7.493022e-06	1.393832e-06	MF.9	0	1149784	NC	C	L	HC	0.1449	0.3967	0
3670	41	R	G	217	C	G	CGA	GGA	NonSyn	C217G	CG	8	7	8	0	2.163691	1.207225	6.516837	Human	A	1.604509e-06	2.564144e-07	MF.9	8.429636e-05	1045265	C	C	B	HC	0.0967	0.3957	0
3671	41	R	P	218	G	C	CGA	CCA	NonSyn	G218C	GC	2	7	1	7	0	0	0.3837596	Mosquito	A	1.263716e-05	7.038203e-07	MF.9	0	1101091	C	C	D	HC	0.0967	0.3957	0
3672	41	R	P	218	G	C	CGA	CCA	NonSyn	G218C	GC	2	7	1	7	0	0	0	Mosquito	B	3.432927e-06	9.570197e-07	MF.9	4.329042e-06	1133260	C	C	L	HC	0.0967	0.3957	0
3673	41	R	R	219	A	C	CGA	CGC	Syn	A219C	AC	9	2	8	0	0.632909	0.4049908	0.9697698	Human	A	2.326514e-06	2.040447e-07	MF.9	8.190008e-06	1036754	S	C	D	HC	0.0967	0.3957	0
3674	41	R	R	219	A	G	CGA	CGG	Syn	A219G	AG	9	2	8	0	0.7892237	0.3922787	1.195862	Human	A	1.14325e-05	8.091075e-07	MF.9	5.733006e-05	1045266	S	C	N	HC	0.0967	0.3957	0
3675	41	R	R	217	C	A	CGA	AGA	Syn	C217A	CA	9	3	8	0	0.7016904	0.6383113	0.9075335	Human	B	3.57888e-06	4.588673e-07	MF.9	3.788094e-05	1061722	S	C	D	HC	0.0967	0.3957	0
3676	41	R	R	219	A	G	CGA	CGG	Syn	A219G	AG	9	2	8	0	0.5626879	0.364396	0.8648418	Human	B	1.213945e-05	3.148199e-07	MF.9	7.791348e-05	1077435	S	C	D	HC	0.0967	0.3957	0
3677	41	R	R	217	C	A	CGA	AGA	Syn	C217A	CA	9	2	8	0	1.266767	0.6075874	2.803238	Mosquito	B	4.124727e-06	2.499298e-07	MF.9	3.622434e-05	1126060	S	C	N	HC	0.0967	0.3957	0
3678	41	R	R	219	A	G	CGA	CGG	Syn	A219G	AG	9	4	8	0	0.9927739	0.2415257	1.744022	Mosquito	B	1.180995e-05	6.889282e-07	MF.9	4.261545e-05	1141773	S	C	N	HC	0.0967	0.3957	0
3679	41	R	X	217	C	T	CGA	TGA	NonSyn	C217T	CT	9	5	0	8	0	0	0	Mosquito	A	0.0001578562	6.997471e-06	MF.9	0.0001510471	1117617	X	C	L	HC	0.0967	0.3957	0
3680	42	G	A	221	G	C	GGA	GCA	NonSyn	G221C	GC	9	5	8	0	0.9990454	0.6747294	1.192818	Human	A	3.700457e-06	2.674076e-07	MF.9	1.804566e-05	1036756	C	C	N	HC	0.0734	0.4014	0
3681	42	G	A	221	G	C	GGA	GCA	NonSyn	G221C	GC	9	7	8	0	0.9568363	0.6122488	1.182537	Human	B	4.230269e-06	2.592937e-07	MF.9	4.135436e-05	1068925	C	C	N	HC	0.0734	0.4014	0
3682	42	G	A	221	G	C	GGA	GCA	NonSyn	G221C	GC	9	0	8	0	0.866294	0.5186423	1.602605	Mosquito	B	3.432927e-06	9.570197e-07	MF.9	2.032965e-05	1133263	C	C	N	HC	0.0734	0.4014	0
3683	42	G	E	221	G	A	GGA	GAA	NonSyn	G221A	GA	9	8	8	0	1.017307	0.765447	1.205041	Human	A	6.69739e-06	4.668841e-07	MF.9	0.0001443652	1029556	C	C	N	HC	0.0734	0.4014	0
3684	42	G	E	221	G	A	GGA	GAA	NonSyn	G221A	GA	9	7	8	0	0.9240235	0.5592535	1.288794	Human	B	7.684204e-06	4.645403e-07	MF.9	8.7878e-05	1061725	C	C	N	HC	0.0734	0.4014	0
3685	42	G	E	221	G	A	GGA	GAA	NonSyn	G221A	GA	9	6	8	0	0.7465356	0.472373	1.076148	Mosquito	A	8.774931e-06	2.38219e-07	MF.9	0.0001700937	1093894	C	C	N	HC	0.0734	0.4014	0
3686	42	G	E	221	G	A	GGA	GAA	NonSyn	G221A	GA	9	7	8	0	0.8693955	0.5398937	1.164801	Mosquito	B	6.112924e-06	3.730988e-07	MF.9	6.098894e-05	1126063	C	C	N	HC	0.0734	0.4014	0
3687	42	G	G	222	A	C	GGA	GGC	Syn	A222C	AC	1	8	1	7	0	0	1.856639	Human	B	2.288044e-06	1.737362e-07	MF.9	0	1068926	S	C	N	HC	0.0734	0.4014	0
3688	42	G	G	222	A	T	GGA	GGT	Syn	A222T	AT	1	8	1	7	0	0	0	Mosquito	B	2.369747e-06	1.784832e-07	MF.9	0	1149791	S	C	L	HC	0.0734	0.4014	0
3689	43	P	L	224	C	T	CCA	CTA	NonSyn	C224T	CT	9	9	8	0	0.8910075	0.4775165	1.520086	Human	A	0.0002554735	2.089311e-05	MF.9	0.0005589816	1053286	C	C	N	HC	0.0356	0.4005	0
3690	43	P	L	224	C	T	CCA	CTA	NonSyn	C224T	CT	9	9	8	0	0.4834236	0.3343672	0.5859867	Human	B	0.0002635581	1.843403e-05	MF.9	0.0004495721	1085455	C	C	D	HC	0.0356	0.4005	0
3691	43	P	L	224	C	T	CCA	CTA	NonSyn	C224T	CT	9	9	8	0	0.8149534	0.7092478	0.9586185	Mosquito	A	0.0001578562	6.997471e-06	MF.9	0.0007878669	1117624	C	C	D	HC	0.0356	0.4005	0
3692	43	P	L	224	C	T	CCA	CTA	NonSyn	C224T	CT	9	9	8	0	0.4959794	0.3625344	0.6042508	Mosquito	B	0.0002034795	7.793136e-06	MF.9	0.0005196072	1149793	C	C	D	HC	0.0356	0.4005	0
3693	43	P	P	225	A	C	CCA	CCC	Syn	A225C	AC	9	5	8	0	0.5432681	0.4973222	0.6927482	Human	B	2.288044e-06	1.737362e-07	MF.9	1.030275e-05	1068927	S	C	D	HC	0.0356	0.4005	0
3694	43	P	P	225	A	C	CCA	CCC	Syn	A225C	AC	2	7	1	7	0	0	0	Mosquito	B	2.391816e-06	1.394774e-07	MF.9	0	1133265	S	C	L	HC	0.0356	0.4005	0
3695	43	P	P	225	A	G	CCA	CCG	Syn	A225G	AG	9	8	8	0	0.8807232	0.6990424	1.091334	Mosquito	B	1.180995e-05	6.889282e-07	MF.9	0.0001132824	1141777	S	C	N	HC	0.0356	0.4005	0
3696	43	P	Q	224	C	A	CCA	CAA	NonSyn	C224A	CA	8	1	8	0	0.8473893	0.3623192	1.237114	Human	A	2.985888e-06	1.847504e-07	MF.9	9.015832e-06	1029558	C	C	N	HC	0.0356	0.4005	0
3697	43	P	R	224	C	G	CCA	CGA	NonSyn	C224G	CG	1	8	1	7	5.821275	0	11.64255	Mosquito	A	2.20927e-06	9.740866e-08	MF.9	0	1109607	C	C	N	HC	0.0356	0.4005	0
3698	43	P	T	223	C	A	CCA	ACA	NonSyn	C223A	CA	9	1	8	0	1.082403	0.5611566	1.897267	Human	B	3.57888e-06	4.588673e-07	MF.9	3.196182e-05	1061726	NC	C	N	HC	0.0356	0.4005	0
3699	44	L	F	228	A	C	TTA	TTC	NonSyn	A228C	AC	9	2	8	0	1.713361	0.3063641	4.269905	Human	A	2.326514e-06	2.040447e-07	MF.9	0.0001429569	1036761	C	C	N	HC	0.0405	0.4007	0
3700	44	L	F	228	A	T	TTA	TTT	NonSyn	A228T	AT	9	1	8	0	1.166113	0.5700572	1.450511	Human	A	2.37871e-06	1.833534e-07	MF.9	3.363691e-05	1053288	C	C	N	HC	0.0405	0.4007	0
3701	44	L	F	228	A	C	TTA	TTC	NonSyn	A228C	AC	9	0	8	0	0.7581525	0.4459625	1.255617	Human	B	2.288044e-06	1.737362e-07	MF.9	5.179844e-06	1068930	C	C	N	HC	0.0405	0.4007	0
3702	44	L	I	226	T	A	TTA	ATA	NonSyn	T226A	TA	9	5	8	0	1.510495	0.4223243	3.147291	Human	A	3.680327e-06	2.30523e-07	MF.9	0.0001949508	1029559	C	C	N	HC	0.0405	0.4007	0
3703	44	L	I	226	T	A	TTA	ATA	NonSyn	T226A	TA	9	1	8	0	0.8212022	0.7436693	0.8769369	Human	B	4.145682e-06	2.689648e-07	MF.9	3.452582e-05	1061728	C	C	D	HC	0.0405	0.4007	0
3704	44	L	L	226	T	C	TTA	CTA	Syn	T226C	TC	9	7	8	0	1.390418	0.5762533	2.042614	Human	A	8.304354e-06	4.831455e-07	MF.9	6.202979e-05	1036759	S	C	N	HC	0.0405	0.4007	0
3705	44	L	L	228	A	G	TTA	TTG	Syn	A228G	AG	9	9	8	0	0.8102845	0.614137	0.9512308	Human	A	1.14325e-05	8.091075e-07	MF.9	0.0001681845	1045273	S	C	D	HC	0.0405	0.4007	0
3706	44	L	L	226	T	C	TTA	CTA	Syn	T226C	TC	9	4	8	0	1.554628	0.3715815	2.672711	Human	B	8.638697e-06	3.744363e-07	MF.9	0.0001611205	1068928	S	C	N	HC	0.0405	0.4007	0
3707	44	L	L	228	A	G	TTA	TTG	Syn	A228G	AG	9	9	8	0	1.223236	0.7833846	1.471255	Human	B	1.213945e-05	3.148199e-07	MF.9	0.0002745317	1077442	S	C	N	HC	0.0405	0.4007	0
3708	44	L	L	226	T	C	TTA	CTA	Syn	T226C	TC	9	9	8	0	0.9639891	0.6587984	1.376838	Mosquito	A	1.724887e-05	1.124953e-06	MF.9	0.0007721219	1101097	S	C	N	HC	0.0405	0.4007	0
3709	44	L	L	228	A	G	TTA	TTG	Syn	A228G	AG	9	9	8	0	1.042533	0.6608359	1.424229	Mosquito	A	1.210803e-05	6.184859e-07	MF.9	0.001092393	1109611	S	C	N	HC	0.0405	0.4007	0
3710	44	L	L	226	T	C	TTA	CTA	Syn	T226C	TC	9	5	8	0	1.427969	0.8895419	1.988231	Mosquito	B	8.756502e-06	5.645669e-07	MF.9	0.0001647582	1133266	S	C	N	HC	0.0405	0.4007	0
3711	44	L	L	228	A	G	TTA	TTG	Syn	A228G	AG	9	9	8	0	0.7893968	0.5259017	1.135795	Mosquito	B	1.180995e-05	6.889282e-07	MF.9	0.0001609156	1141780	S	C	N	HC	0.0405	0.4007	0
3712	44	L	S	227	T	C	TTA	TCA	NonSyn	T227C	TC	9	9	8	0	0.8733987	0.5675434	1.876023	Human	A	8.304354e-06	4.831455e-07	MF.9	0.0001578961	1036760	NC	C	N	HC	0.0405	0.4007	0
3713	44	L	S	227	T	C	TTA	TCA	NonSyn	T227C	TC	9	9	8	0	1.25134	0.747007	1.809636	Human	B	8.638697e-06	3.744363e-07	MF.9	0.0003116652	1068929	NC	C	N	HC	0.0405	0.4007	0
3714	44	L	S	227	T	C	TTA	TCA	NonSyn	T227C	TC	8	3	8	0	0.7910778	0.4648729	1.57619	Mosquito	A	1.724887e-05	1.124953e-06	MF.9	7.907103e-05	1101098	NC	C	N	HC	0.0405	0.4007	0
3715	44	L	S	227	T	C	TTA	TCA	NonSyn	T227C	TC	9	6	8	0	0.8982447	0.6488087	1.077813	Mosquito	B	8.756502e-06	5.645669e-07	MF.9	7.243415e-05	1133267	NC	C	N	HC	0.0405	0.4007	0
3716	45	K	E	229	A	G	AAA	GAA	NonSyn	A229G	AG	5	4	1	7	0.7689213	0	1.922303	Human	B	1.213945e-05	3.148199e-07	MF.9	5.329752e-06	1077443	C	C	N	HC	0.0433	0.3952	0
3717	45	K	E	229	A	G	AAA	GAA	NonSyn	A229G	AG	9	0	8	0	0.3869106	0.2029286	0.5121692	Mosquito	B	1.180995e-05	6.889282e-07	MF.9	1.554678e-05	1141781	C	C	D	HC	0.0433	0.3952	0
3718	45	K	I	230	A	T	AAA	ATA	NonSyn	A230T	AT	0	9	0	8	0	0	0	Human	A	2.37871e-06	1.833534e-07	MF.9	0	1053290	NC	C	L	HC	0.0433	0.3952	0
3719	45	K	K	231	A	G	AAA	AAG	Syn	A231G	AG	9	9	8	0	1.149452	0.7305076	1.819201	Human	A	1.14325e-05	8.091075e-07	MF.9	8.635164e-05	1045276	S	C	N	HC	0.0433	0.3952	0
3720	45	K	K	231	A	G	AAA	AAG	Syn	A231G	AG	9	9	8	0	0.8710813	0.6813772	1.005774	Human	B	1.213945e-05	3.148199e-07	MF.9	0.0002734966	1077445	S	C	N	HC	0.0433	0.3952	0
3721	45	K	K	231	A	G	AAA	AAG	Syn	A231G	AG	9	8	8	0	1.838985	0.2357171	3.516299	Mosquito	A	1.210803e-05	6.184859e-07	MF.9	0.0001102522	1109614	S	C	N	HC	0.0433	0.3952	0
3722	45	K	K	231	A	G	AAA	AAG	Syn	A231G	AG	9	3	8	0	1.149157	0.3524461	1.945868	Mosquito	B	1.180995e-05	6.889282e-07	MF.9	0.0001226069	1141783	S	C	N	HC	0.0433	0.3952	0
3723	45	K	Q	229	A	C	AAA	CAA	NonSyn	A229C	AC	9	8	8	0	0.9241917	0.5155898	1.308124	Human	A	2.326514e-06	2.040447e-07	MF.9	0.0001386746	1036762	C	C	N	HC	0.0433	0.3952	0
3724	45	K	Q	229	A	C	AAA	CAA	NonSyn	A229C	AC	9	9	8	0	1.42563	0.8018997	1.755642	Human	B	2.288044e-06	1.737362e-07	MF.9	0.0004690182	1068931	C	C	N	HC	0.0433	0.3952	0
3725	45	K	Q	229	A	C	AAA	CAA	NonSyn	A229C	AC	9	3	8	0	1.349561	0.4567316	2.924243	Mosquito	B	2.391816e-06	1.394774e-07	MF.9	7.77339e-05	1133269	C	C	N	HC	0.0433	0.3952	0
3726	45	K	R	230	A	G	AAA	AGA	NonSyn	A230G	AG	9	6	8	0	0.9152709	0.3962653	1.434276	Human	B	1.213945e-05	3.148199e-07	MF.9	0.0001201785	1077444	C	C	N	HC	0.0433	0.3952	0
3727	45	K	T	230	A	C	AAA	ACA	NonSyn	A230C	AC	1	8	1	7	0	0	0	Mosquito	A	3.286083e-06	1.701643e-07	MF.9	0	1101101	C	C	L	HC	0.0433	0.3952	0
3728	45	K	X	229	A	T	AAA	TAA	NonSyn	A229T	AT	0	9	0	8	0	0	0	Human	A	2.37871e-06	1.833534e-07	MF.9	0	1053289	X	C	L	HC	0.0433	0.3952	0
3729	45	K	X	229	A	T	AAA	TAA	NonSyn	A229T	AT	0	9	0	8	0	0	0	Human	B	2.589251e-06	1.43343e-07	MF.9	0	1085458	X	C	L	HC	0.0433	0.3952	0
3730	45	K	X	229	A	T	AAA	TAA	NonSyn	A229T	AT	1	8	1	7	0	0	0	Mosquito	A	2.875636e-06	1.187371e-07	MF.9	0	1117627	X	C	L	HC	0.0433	0.3952	0
3731	45	K	X	229	A	T	AAA	TAA	NonSyn	A229T	AT	0	9	0	8	0	0	0	Mosquito	B	2.369747e-06	1.784832e-07	MF.9	0	1149796	X	C	L	HC	0.0433	0.3952	0
3732	46	L	L	234	G	A	CTG	CTA	Syn	G234A	GA	9	6	8	0	1.088131	0.3447141	1.533251	Human	A	6.69739e-06	4.668841e-07	MF.9	5.744061e-05	1029563	S	C	N	HC	0.0380	0.3928	1
3733	46	L	L	232	C	T	CTG	TTG	Syn	C232T	CT	9	9	8	0	0.6851042	0.3372887	1.038812	Human	A	0.0002554735	2.089311e-05	MF.9	0.0005689502	1053292	S	C	N	HC	0.0380	0.3928	1
3734	46	L	L	234	G	T	CTG	CTT	Syn	G234T	GT	9	4	8	0	1.828777	0.2519747	3.435793	Human	A	5.90433e-06	1.997031e-07	MF.9	4.102901e-05	1053293	S	C	N	HC	0.0380	0.3928	1
3735	46	L	L	234	G	A	CTG	CTA	Syn	G234A	GA	9	6	8	0	1.134832	0.9223675	1.443655	Human	B	7.684204e-06	4.645403e-07	MF.9	7.85384e-05	1061732	S	C	N	HC	0.0380	0.3928	1
3736	46	L	L	234	G	C	CTG	CTC	Syn	G234C	GC	9	3	8	0	1.150686	0.1789423	4.761727	Human	B	4.230269e-06	2.592937e-07	MF.9	2.94519e-05	1068935	S	C	N	HC	0.0380	0.3928	1
3737	46	L	L	232	C	T	CTG	TTG	Syn	C232T	CT	9	9	8	0	0.8059903	0.3317219	1.334546	Human	B	0.0002635581	1.843403e-05	MF.9	0.0009427925	1085461	S	C	N	HC	0.0380	0.3928	1
3738	46	L	L	234	G	T	CTG	CTT	Syn	G234T	GT	9	6	8	0	0.9640733	0.4526698	1.46977	Human	B	7.052585e-06	4.58263e-07	MF.9	9.8173e-06	1085462	S	C	N	HC	0.0380	0.3928	1
3739	46	L	L	234	G	C	CTG	CTC	Syn	G234C	GC	9	4	8	0	1.325894	0.7473986	1.977943	Mosquito	A	1.263716e-05	7.038203e-07	MF.9	0.0001420798	1101104	S	C	N	HC	0.0380	0.3928	1
3740	46	L	L	234	G	T	CTG	CTT	Syn	G234T	GT	9	1	8	0	0.8005212	0.5563997	1.56141	Mosquito	A	2.290083e-05	1.366303e-06	MF.9	0.0001278718	1117631	S	C	N	HC	0.0380	0.3928	1
3741	46	L	L	234	G	C	CTG	CTC	Syn	G234C	GC	9	5	8	0	1.711422	0.3012722	3.172748	Mosquito	B	3.432927e-06	9.570197e-07	MF.9	1.245353e-05	1133273	S	C	N	HC	0.0380	0.3928	1
3742	46	L	L	232	C	T	CTG	TTG	Syn	C232T	CT	9	9	8	0	0.6267586	0.2142332	0.9182481	Mosquito	B	0.0002034795	7.793136e-06	MF.9	0.0003275241	1149799	S	C	D	HC	0.0380	0.3928	1
3743	46	L	M	232	C	A	CTG	ATG	NonSyn	C232A	CA	9	9	8	0	1.873717	0.744028	3.064432	Human	A	2.985888e-06	1.847504e-07	MF.9	0.0004452653	1029561	C	C	N	HC	0.0380	0.3928	1
3744	46	L	M	232	C	A	CTG	ATG	NonSyn	C232A	CA	9	9	8	0	1.023656	0.5630221	1.521752	Human	B	3.57888e-06	4.588673e-07	MF.9	0.0003663702	1061730	C	C	N	HC	0.0380	0.3928	1
3745	46	L	M	232	C	A	CTG	ATG	NonSyn	C232A	CA	9	9	8	0	1.046507	0.7660987	1.462109	Mosquito	A	6.508077e-06	1.996644e-07	MF.9	0.0006584748	1093899	C	C	N	HC	0.0380	0.3928	1
3746	46	L	M	232	C	A	CTG	ATG	NonSyn	C232A	CA	9	8	8	0	1.376894	0.439056	2.088664	Mosquito	B	4.124727e-06	2.499298e-07	MF.9	0.0003217781	1126068	C	C	N	HC	0.0380	0.3928	1
3747	46	L	P	233	T	C	CTG	CCG	NonSyn	T233C	TC	9	8	8	0	0.9610388	0.5362158	1.401709	Human	A	8.304354e-06	4.831455e-07	MF.9	4.196955e-05	1036765	C	C	N	HC	0.0380	0.3928	1
3748	46	L	P	233	T	C	CTG	CCG	NonSyn	T233C	TC	9	9	8	0	1.11478	0.7589494	1.479087	Human	B	8.638697e-06	3.744363e-07	MF.9	0.0001490883	1068934	C	C	N	HC	0.0380	0.3928	1
3749	46	L	P	233	T	C	CTG	CCG	NonSyn	T233C	TC	9	6	8	0	1.017019	0.6854657	1.444391	Mosquito	B	8.756502e-06	5.645669e-07	MF.9	0.0001545127	1133272	C	C	N	HC	0.0380	0.3928	1
3750	46	L	Q	233	T	A	CTG	CAG	NonSyn	T233A	TA	9	7	8	0	4.209565	0.7077486	9.106635	Human	A	3.680327e-06	2.30523e-07	MF.9	0.0001426965	1029562	C	C	N	HC	0.0380	0.3928	1
3751	46	L	Q	233	T	A	CTG	CAG	NonSyn	T233A	TA	9	7	8	0	1.151595	0.3158741	3.446692	Human	B	4.145682e-06	2.689648e-07	MF.9	5.963533e-05	1061731	C	C	N	HC	0.0380	0.3928	1
3752	46	L	Q	233	T	A	CTG	CAG	NonSyn	T233A	TA	9	8	8	0	1.008425	0.4855437	1.581489	Mosquito	A	7.166782e-06	3.393327e-07	MF.9	0.0002612603	1093900	C	C	N	HC	0.0380	0.3928	1
3753	46	L	Q	233	T	A	CTG	CAG	NonSyn	T233A	TA	9	7	8	0	1.76463	0.280061	3.55705	Mosquito	B	4.312763e-06	3.05777e-07	MF.9	1.236102e-05	1126069	C	C	N	HC	0.0380	0.3928	1
3754	46	L	R	233	T	G	CTG	CGG	NonSyn	T233G	TG	0	9	0	8	0	0	0	Mosquito	A	3.486291e-06	1.611304e-07	MF.9	0	1109616	C	C	L	HC	0.0380	0.3928	1
3755	46	L	V	232	C	G	CTG	GTG	NonSyn	C232G	CG	9	9	8	0	0.8107713	0.6539916	1.080988	Human	A	1.604509e-06	2.564144e-07	MF.9	0.0001978957	1045277	C	C	N	HC	0.0380	0.3928	1
3756	46	L	V	232	C	G	CTG	GTG	NonSyn	C232G	CG	9	9	8	0	1.645925	0.9610337	1.870167	Human	B	1.455268e-06	7.022105e-08	MF.9	0.0004152195	1077446	C	C	N	HC	0.0380	0.3928	1
3757	46	L	V	232	C	G	CTG	GTG	NonSyn	C232G	CG	9	4	8	0	1.428344	0.5221461	2.12655	Mosquito	B	1.513275e-06	1.225367e-07	MF.9	7.469848e-05	1141784	C	C	N	HC	0.0380	0.3928	1
3758	47	F	F	237	C	T	TTC	TTT	Syn	C237T	CT	9	9	8	0	0.673394	0.6214962	0.832706	Human	A	0.0002554735	2.089311e-05	MF.9	0.0007249826	1053294	S	C	D	HC	0.0231	0.3933	1
3759	47	F	F	237	C	T	TTC	TTT	Syn	C237T	CT	9	9	8	0	0.7904523	0.5494144	0.9525652	Human	B	0.0002635581	1.843403e-05	MF.9	0.0006241913	1085463	S	C	D	HC	0.0231	0.3933	1
3760	47	F	F	237	C	T	TTC	TTT	Syn	C237T	CT	9	9	8	0	0.8131009	0.5820809	1.010968	Mosquito	B	0.0002034795	7.793136e-06	MF.9	0.0007350149	1149801	S	C	N	HC	0.0231	0.3933	1
3761	47	F	L	237	C	A	TTC	TTA	NonSyn	C237A	CA	9	6	8	0	0.9740349	0.4456391	1.360854	Human	A	2.985888e-06	1.847504e-07	MF.9	2.196917e-05	1029566	C	C	N	HC	0.0231	0.3933	1
3762	47	F	L	235	T	C	TTC	CTC	NonSyn	T235C	TC	9	6	8	0	1.255769	0.9240161	1.684014	Human	A	8.304354e-06	4.831455e-07	MF.9	2.579691e-05	1036767	C	C	N	HC	0.0231	0.3933	1
3763	47	F	L	237	C	A	TTC	TTA	NonSyn	C237A	CA	9	9	8	0	1.067662	0.6756493	1.47314	Human	B	3.57888e-06	4.588673e-07	MF.9	4.100527e-05	1061735	C	C	N	HC	0.0231	0.3933	1
3764	47	F	L	235	T	C	TTC	CTC	NonSyn	T235C	TC	9	7	8	0	1.011315	0.8119459	1.297132	Human	B	8.638697e-06	3.744363e-07	MF.9	8.985236e-05	1068936	C	C	N	HC	0.0231	0.3933	1
3765	47	F	L	237	C	G	TTC	TTG	NonSyn	C237G	CG	1	8	1	7	0	0	2.210465	Human	B	1.455268e-06	7.022105e-08	MF.9	0	1077450	C	C	N	HC	0.0231	0.3933	1
3766	47	F	L	237	C	G	TTC	TTG	NonSyn	C237G	CG	1	8	1	7	0	0	7.532685	Mosquito	A	2.20927e-06	9.740866e-08	MF.9	0	1109619	C	C	N	HC	0.0231	0.3933	1
3767	47	F	L	235	T	C	TTC	CTC	NonSyn	T235C	TC	9	4	8	0	0.9630643	0.6841806	1.315254	Mosquito	B	8.756502e-06	5.645669e-07	MF.9	0.000145375	1133274	C	C	N	HC	0.0231	0.3933	1
3768	47	F	L	237	C	G	TTC	TTG	NonSyn	C237G	CG	1	8	1	7	0	0	0	Mosquito	B	1.513275e-06	1.225367e-07	MF.9	6.125124e-06	1141788	C	C	L	HC	0.0231	0.3933	1
3769	47	F	V	235	T	G	TTC	GTC	NonSyn	T235G	TG	1	8	1	7	0	0	4.485958	Mosquito	A	3.486291e-06	1.611304e-07	MF.9	0	1109617	NC	C	N	HC	0.0231	0.3933	1
3770	48	M	I	240	G	A	ATG	ATA	NonSyn	G240A	GA	9	1	8	0	1.088845	0.791117	1.486936	Human	A	6.69739e-06	4.668841e-07	MF.9	4.532509e-05	1029568	C	C	N	HC	0.0294	0.4036	1
3771	48	M	I	240	G	T	ATG	ATT	NonSyn	G240T	GT	9	5	8	0	0.6630215	0.4003053	0.9534626	Human	A	5.90433e-06	1.997031e-07	MF.9	9.820437e-05	1053296	C	C	D	HC	0.0294	0.4036	1
3772	48	M	I	240	G	A	ATG	ATA	NonSyn	G240A	GA	9	6	8	0	1.31321	1.117421	1.436435	Human	B	7.684204e-06	4.645403e-07	MF.9	6.607077e-05	1061737	C	C	B	HC	0.0294	0.4036	1
3773	48	M	I	240	G	C	ATG	ATC	NonSyn	G240C	GC	9	6	8	0	2.334081	0.6297009	4.692294	Mosquito	A	1.263716e-05	7.038203e-07	MF.9	0.0007940771	1101109	C	C	N	HC	0.0294	0.4036	1
3774	48	M	I	240	G	A	ATG	ATA	NonSyn	G240A	GA	8	3	8	0	1.233085	0.6662398	1.702288	Mosquito	B	6.112924e-06	3.730988e-07	MF.9	0.0001224856	1126075	C	C	N	HC	0.0294	0.4036	1
3775	48	M	L	238	A	T	ATG	TTG	NonSyn	A238T	AT	9	4	8	0	0.7418264	0.4240758	1.07252	Human	A	2.37871e-06	1.833534e-07	MF.9	2.873832e-05	1053295	C	C	N	HC	0.0294	0.4036	1
3776	48	M	L	238	A	C	ATG	CTG	NonSyn	A238C	AC	9	4	8	0	0.6709886	0.4423519	0.8324325	Human	B	2.288044e-06	1.737362e-07	MF.9	3.109135e-05	1068938	C	C	D	HC	0.0294	0.4036	1
3777	48	M	L	238	A	C	ATG	CTG	NonSyn	A238C	AC	0	9	0	8	0	0	0	Mosquito	A	3.286083e-06	1.701643e-07	MF.9	0	1101107	C	C	L	HC	0.0294	0.4036	1
3778	48	M	L	238	A	T	ATG	TTG	NonSyn	A238T	AT	1	8	0	8	0	0	0	Mosquito	A	2.875636e-06	1.187371e-07	MF.9	0	1117633	C	C	L	HC	0.0294	0.4036	1
3779	48	M	L	238	A	T	ATG	TTG	NonSyn	A238T	AT	9	0	8	0	0.9299938	0.4796269	1.320136	Mosquito	B	2.369747e-06	1.784832e-07	MF.9	6.238848e-06	1149802	C	C	N	HC	0.0294	0.4036	1
3780	48	M	R	239	T	G	ATG	AGG	NonSyn	T239G	TG	1	8	0	8	0	0	0	Mosquito	B	2.030327e-06	1.119074e-07	MF.9	0	1141790	C	C	L	HC	0.0294	0.4036	1
3781	48	M	T	239	T	C	ATG	ACG	NonSyn	T239C	TC	9	5	8	0	1.391354	0.5775331	2.658793	Human	A	8.304354e-06	4.831455e-07	MF.9	3.655853e-05	1036770	C	C	N	HC	0.0294	0.4036	1
3782	48	M	T	239	T	C	ATG	ACG	NonSyn	T239C	TC	9	8	8	0	0.9420324	0.7212421	1.239833	Human	B	8.638697e-06	3.744363e-07	MF.9	0.0001333126	1068939	C	C	N	HC	0.0294	0.4036	1
3783	48	M	V	238	A	G	ATG	GTG	NonSyn	A238G	AG	9	1	8	0	0.7284122	0.2041738	1.249215	Human	A	1.14325e-05	8.091075e-07	MF.9	3.59229e-05	1045282	C	C	N	HC	0.0294	0.4036	1
3784	48	M	V	238	A	G	ATG	GTG	NonSyn	A238G	AG	9	1	8	0	0.6626694	0.4065682	0.9249719	Mosquito	B	1.180995e-05	6.889282e-07	MF.9	4.991078e-05	1141789	C	C	D	HC	0.0294	0.4036	1
3785	49	A	A	243	C	T	GCC	GCT	Syn	C243T	CT	9	9	8	0	0.412409	0.2330662	0.590981	Human	B	0.0002635581	1.843403e-05	MF.9	0.000575241	1085468	S	C	D	HC	0.0281	0.4248	1
3786	49	A	A	243	C	G	GCC	GCG	Syn	C243G	CG	1	8	1	7	0	0	0	Mosquito	A	2.20927e-06	9.740866e-08	MF.9	0	1109623	S	C	L	HC	0.0281	0.4248	1
3787	49	A	D	242	C	A	GCC	GAC	NonSyn	C242A	CA	1	8	1	7	0.8768237	0	1.753647	Human	A	2.985888e-06	1.847504e-07	MF.9	0	1029570	C	C	N	HC	0.0281	0.4248	1
3788	49	A	G	242	C	G	GCC	GGC	NonSyn	C242G	CG	1	8	1	7	0.9507242	0	2.37681	Human	A	1.604509e-06	2.564144e-07	MF.9	0	1045284	C	C	N	HC	0.0281	0.4248	1
3789	49	A	S	241	G	T	GCC	TCC	NonSyn	G241T	GT	9	8	8	0	1.174176	0.5406414	1.49556	Human	A	5.90433e-06	1.997031e-07	MF.9	0.0001466332	1053297	C	C	N	HC	0.0281	0.4248	1
3790	49	A	S	241	G	T	GCC	TCC	NonSyn	G241T	GT	9	9	8	0	1.048294	0.8296032	1.295747	Human	B	7.052585e-06	4.58263e-07	MF.9	0.0001957966	1085466	C	C	N	HC	0.0281	0.4248	1
3791	49	A	S	241	G	T	GCC	TCC	NonSyn	G241T	GT	9	6	8	0	1.459379	0.413572	2.397571	Mosquito	B	7.493022e-06	1.393832e-06	MF.9	9.708873e-05	1149804	C	C	N	HC	0.0281	0.4248	1
3792	49	A	T	241	G	A	GCC	ACC	NonSyn	G241A	GA	9	0	8	0	0.6953079	0.493647	0.7961384	Human	B	7.684204e-06	4.645403e-07	MF.9	2.865316e-05	1061738	C	C	D	HC	0.0281	0.4248	1
3793	49	A	T	241	G	A	GCC	ACC	NonSyn	G241A	GA	9	4	8	0	1.134815	0.5160886	1.675568	Mosquito	A	8.774931e-06	2.38219e-07	MF.9	0.0004300966	1093907	C	C	N	HC	0.0281	0.4248	1
3794	49	A	V	242	C	T	GCC	GTC	NonSyn	C242T	CT	9	9	8	0	0.7186915	0.3093851	0.8481372	Human	A	0.0002554735	2.089311e-05	MF.9	0.0003851717	1053298	NC	C	D	HC	0.0281	0.4248	1
3795	50	L	L	246	G	A	CTG	CTA	Syn	G246A	GA	9	2	8	0	0.6371603	0.2361752	1.035421	Human	B	7.684204e-06	4.645403e-07	MF.9	9.809692e-05	1061743	S	C	N	HC	0.0320	0.4256	1
3796	50	L	L	244	C	T	CTG	TTG	Syn	C244T	CT	9	9	8	0	0.3884315	0.3108367	0.5185016	Human	B	0.0002635581	1.843403e-05	MF.9	0.0004474315	1085469	S	C	D	HC	0.0320	0.4256	1
3797	50	L	L	244	C	T	CTG	TTG	Syn	C244T	CT	9	5	8	0	1.213911	0.236347	1.64486	Mosquito	A	0.0001578562	6.997471e-06	MF.9	0.001610022	1117638	S	C	N	HC	0.0320	0.4256	1
3798	50	L	L	244	C	T	CTG	TTG	Syn	C244T	CT	9	9	8	0	0.6217228	0.3175354	0.9239856	Mosquito	B	0.0002034795	7.793136e-06	MF.9	0.0005288102	1149807	S	C	D	HC	0.0320	0.4256	1
3799	50	L	P	245	T	C	CTG	CCG	NonSyn	T245C	TC	1	8	0	8	0	0	0	Human	A	8.304354e-06	4.831455e-07	MF.9	0	1036773	C	C	L	HC	0.0320	0.4256	1
3800	50	L	P	245	T	C	CTG	CCG	NonSyn	T245C	TC	1	8	0	8	0	0	0	Mosquito	A	1.724887e-05	1.124953e-06	MF.9	0	1101111	C	C	L	HC	0.0320	0.4256	1
3801	50	L	P	245	T	C	CTG	CCG	NonSyn	T245C	TC	1	8	1	7	0.09494507	0	0.2373627	Mosquito	B	8.756502e-06	5.645669e-07	MF.9	0	1133280	C	C	D	HC	0.0320	0.4256	1
3802	50	L	R	245	T	G	CTG	CGG	NonSyn	T245G	TG	1	8	1	7	0	0	0	Human	A	1.799189e-06	1.556942e-07	MF.9	0	1045287	C	C	L	HC	0.0320	0.4256	1
3803	50	L	R	245	T	G	CTG	CGG	NonSyn	T245G	TG	1	8	1	7	0	0	0	Human	B	1.80746e-06	1.143024e-07	MF.9	4.634522e-06	1077456	C	C	L	HC	0.0320	0.4256	1
3804	50	L	V	244	C	G	CTG	GTG	NonSyn	C244G	CG	1	8	0	8	0	0	0	Human	A	1.604509e-06	2.564144e-07	MF.9	0	1045286	C	C	L	HC	0.0320	0.4256	1
3805	50	L	V	244	C	G	CTG	GTG	NonSyn	C244G	CG	1	8	1	7	0	0	0	Mosquito	B	1.513275e-06	1.225367e-07	MF.9	6.610128e-06	1141793	C	C	L	HC	0.0320	0.4256	1
3806	51	V	A	248	T	C	GTG	GCG	NonSyn	T248C	TC	9	1	8	0	2.007018	0.3048446	4.11135	Human	A	8.304354e-06	4.831455e-07	MF.9	2.33694e-05	1036776	NC	C	N	HC	0.0389	0.4069	1
3807	51	V	A	248	T	C	GTG	GCG	NonSyn	T248C	TC	9	2	8	0	1.224314	0.5749843	2.045335	Mosquito	A	1.724887e-05	1.124953e-06	MF.9	7.221259e-05	1101114	NC	C	N	HC	0.0389	0.4069	1
3808	51	V	A	248	T	C	GTG	GCG	NonSyn	T248C	TC	9	7	8	0	0.973036	0.8357818	1.181377	Mosquito	B	8.756502e-06	5.645669e-07	MF.9	7.617887e-05	1133283	NC	C	N	HC	0.0389	0.4069	1
3809	51	V	E	248	T	A	GTG	GAG	NonSyn	T248A	TA	0	9	0	8	0	0	0	Human	A	3.680327e-06	2.30523e-07	MF.9	0	1029576	C	C	L	HC	0.0389	0.4069	1
3810	51	V	E	248	T	A	GTG	GAG	NonSyn	T248A	TA	2	7	1	7	0	0	0	Human	B	4.145682e-06	2.689648e-07	MF.9	4.473512e-06	1061745	C	C	L	HC	0.0389	0.4069	1
3811	51	V	E	248	T	A	GTG	GAG	NonSyn	T248A	TA	1	8	1	7	0	0	0	Mosquito	A	7.166782e-06	3.393327e-07	MF.9	0	1093914	C	C	L	HC	0.0389	0.4069	1
3812	51	V	E	248	T	A	GTG	GAG	NonSyn	T248A	TA	1	8	1	7	0	0	0	Mosquito	B	4.312763e-06	3.05777e-07	MF.9	0	1126083	C	C	L	HC	0.0389	0.4069	1
3813	51	V	G	248	T	G	GTG	GGG	NonSyn	T248G	TG	0	9	0	8	0	0	0	Human	B	1.80746e-06	1.143024e-07	MF.9	0	1077457	NC	C	L	HC	0.0389	0.4069	1
3814	51	V	G	248	T	G	GTG	GGG	NonSyn	T248G	TG	0	9	0	8	0	0	0	Mosquito	A	3.486291e-06	1.611304e-07	MF.9	0	1109626	NC	C	L	HC	0.0389	0.4069	1
3815	51	V	L	247	G	C	GTG	CTG	NonSyn	G247C	GC	9	5	8	0	1.502359	0.6926694	1.869186	Human	B	4.230269e-06	2.592937e-07	MF.9	7.430973e-05	1068944	C	C	N	HC	0.0389	0.4069	1
3816	51	V	M	247	G	A	GTG	ATG	NonSyn	G247A	GA	9	1	8	0	1.282217	0.4605523	2.248283	Human	A	6.69739e-06	4.668841e-07	MF.9	6.85556e-06	1029575	C	C	N	HC	0.0389	0.4069	1
3817	51	V	M	247	G	A	GTG	ATG	NonSyn	G247A	GA	8	6	8	0	1.431321	0.9775063	1.653049	Mosquito	B	6.112924e-06	3.730988e-07	MF.9	9.709115e-05	1126082	C	C	N	HC	0.0389	0.4069	1
3818	51	V	V	249	G	A	GTG	GTA	Syn	G249A	GA	9	6	8	0	1.364054	0.7245424	1.762485	Human	A	6.69739e-06	4.668841e-07	MF.9	8.883786e-05	1029577	S	C	N	HC	0.0389	0.4069	1
3819	51	V	V	249	G	C	GTG	GTC	Syn	G249C	GC	9	7	8	0	1.229118	0.7370157	1.639655	Human	A	3.700457e-06	2.674076e-07	MF.9	8.200418e-05	1036777	S	C	N	HC	0.0389	0.4069	1
3820	51	V	V	249	G	T	GTG	GTT	Syn	G249T	GT	9	6	8	0	0.9011682	0.5645835	1.426322	Human	A	5.90433e-06	1.997031e-07	MF.9	8.200418e-05	1053303	S	C	N	HC	0.0389	0.4069	1
3821	51	V	V	249	G	A	GTG	GTA	Syn	G249A	GA	9	5	8	0	0.7090094	0.5557143	2.165372	Human	B	7.684204e-06	4.645403e-07	MF.9	4.160984e-05	1061746	S	C	N	HC	0.0389	0.4069	1
3822	51	V	V	249	G	C	GTG	GTC	Syn	G249C	GC	9	4	8	0	1.209267	0.4676696	1.886952	Human	B	4.230269e-06	2.592937e-07	MF.9	2.773989e-05	1068946	S	C	N	HC	0.0389	0.4069	1
3823	51	V	V	249	G	T	GTG	GTT	Syn	G249T	GT	9	5	8	0	1.11143	0.6302825	1.474243	Human	B	7.052585e-06	4.58263e-07	MF.9	7.397305e-05	1085472	S	C	N	HC	0.0389	0.4069	1
3824	51	V	V	249	G	A	GTG	GTA	Syn	G249A	GA	9	2	8	0	1.45894	0.543031	2.338416	Mosquito	A	8.774931e-06	2.38219e-07	MF.9	0.0001738612	1093915	S	C	N	HC	0.0389	0.4069	1
3825	51	V	V	249	G	C	GTG	GTC	Syn	G249C	GC	9	1	8	0	0.7332315	0.3864946	1.095529	Mosquito	A	1.263716e-05	7.038203e-07	MF.9	9.934926e-05	1101115	S	C	N	HC	0.0389	0.4069	1
3826	51	V	V	249	G	A	GTG	GTA	Syn	G249A	GA	9	3	8	0	1.381404	0.3097703	2.453038	Mosquito	B	6.112924e-06	3.730988e-07	MF.9	2.626068e-05	1126084	S	C	N	HC	0.0389	0.4069	1
3827	51	V	V	249	G	T	GTG	GTT	Syn	G249T	GT	9	4	8	0	1.406867	0.7408811	1.934185	Mosquito	B	7.493022e-06	1.393832e-06	MF.9	6.565169e-05	1149810	S	C	N	HC	0.0389	0.4069	1
3828	52	A	A	252	G	A	GCG	GCA	Syn	G252A	GA	9	2	8	0	0.9561286	0.634612	1.308868	Human	A	6.69739e-06	4.668841e-07	MF.9	1.820333e-05	1029580	S	C	N	HC	0.0372	0.3903	1
3829	52	A	A	252	G	T	GCG	GCT	Syn	G252T	GT	9	3	8	0	1.02755	0.3680449	3.506779	Human	A	5.90433e-06	1.997031e-07	MF.9	0.0001334911	1053306	S	C	N	HC	0.0372	0.3903	1
3830	52	A	A	252	G	A	GCG	GCA	Syn	G252A	GA	9	1	8	0	0.8690722	0.5598474	1.293265	Human	B	7.684204e-06	4.645403e-07	MF.9	6.872085e-05	1061749	S	C	N	HC	0.0372	0.3903	1
3831	52	A	A	252	G	T	GCG	GCT	Syn	G252T	GT	9	5	8	0	1.069099	0.4837591	1.746957	Human	B	7.052585e-06	4.58263e-07	MF.9	4.724558e-05	1085475	S	C	N	HC	0.0372	0.3903	1
3832	52	A	A	252	G	A	GCG	GCA	Syn	G252A	GA	9	0	8	0	0.8100271	0.5849334	2.541294	Mosquito	B	6.112924e-06	3.730988e-07	MF.9	4.174618e-05	1126087	S	C	N	HC	0.0372	0.3903	1
3833	52	A	A	252	G	C	GCG	GCC	Syn	G252C	GC	2	7	1	7	0	0	0	Mosquito	B	3.432927e-06	9.570197e-07	MF.9	0	1133286	S	C	L	HC	0.0372	0.3903	1
3834	52	A	A	252	G	T	GCG	GCT	Syn	G252T	GT	9	0	8	0	0.9830562	0.434907	1.567153	Mosquito	B	7.493022e-06	1.393832e-06	MF.9	3.578244e-05	1149813	S	C	N	HC	0.0372	0.3903	1
3835	52	A	E	251	C	A	GCG	GAG	NonSyn	C251A	CA	1	8	1	7	0.573376	0	1.43344	Human	A	2.985888e-06	1.847504e-07	MF.9	0	1029579	C	C	N	HC	0.0372	0.3903	1
3836	52	A	G	251	C	G	GCG	GGG	NonSyn	C251G	CG	0	9	0	8	0	0	0	Human	A	1.604509e-06	2.564144e-07	MF.9	0	1045289	C	C	L	HC	0.0372	0.3903	1
3837	52	A	G	251	C	G	GCG	GGG	NonSyn	C251G	CG	0	9	0	8	0	0	0	Human	B	1.455268e-06	7.022105e-08	MF.9	0	1077458	C	C	L	HC	0.0372	0.3903	1
3838	52	A	G	251	C	G	GCG	GGG	NonSyn	C251G	CG	1	8	1	7	0	0	0	Mosquito	A	2.20927e-06	9.740866e-08	MF.9	0	1109627	C	C	L	HC	0.0372	0.3903	1
3839	52	A	G	251	C	G	GCG	GGG	NonSyn	C251G	CG	1	8	1	7	0	0	1.832013	Mosquito	B	1.513275e-06	1.225367e-07	MF.9	0	1141796	C	C	N	HC	0.0372	0.3903	1
3840	52	A	P	250	G	C	GCG	CCG	NonSyn	G250C	GC	1	8	1	7	0	0	0.8664413	Mosquito	B	3.432927e-06	9.570197e-07	MF.9	0	1133285	NC	C	D	HC	0.0372	0.3903	1
3841	52	A	S	250	G	T	GCG	TCG	NonSyn	G250T	GT	2	7	1	7	0	0	0	Mosquito	A	2.290083e-05	1.366303e-06	MF.9	2.424595e-05	1117642	C	C	L	HC	0.0372	0.3903	1
3842	52	A	T	250	G	A	GCG	ACG	NonSyn	G250A	GA	9	2	8	0	0.6088258	0.1495234	0.8871852	Human	A	6.69739e-06	4.668841e-07	MF.9	1.3475e-05	1029578	C	C	D	HC	0.0372	0.3903	1
3843	52	A	V	251	C	T	GCG	GTG	NonSyn	C251T	CT	9	9	8	0	0.8032872	0.5703657	0.9847459	Mosquito	A	0.0001578562	6.997471e-06	MF.9	0.0007222129	1117643	NC	C	D	HC	0.0372	0.3903	1
3844	52	A	V	251	C	T	GCG	GTG	NonSyn	C251T	CT	9	9	8	0	0.732563	0.5748956	0.8581383	Mosquito	B	0.0002034795	7.793136e-06	MF.9	0.0005092837	1149812	NC	C	D	HC	0.0372	0.3903	1
3845	53	F	C	254	T	G	TTC	TGC	NonSyn	T254G	TG	1	8	1	7	0.9406774	0	2.351694	Human	A	1.799189e-06	1.556942e-07	MF.9	0	1045291	NC	C	N	HC	0.0306	0.3768	1
3846	53	F	C	254	T	G	TTC	TGC	NonSyn	T254G	TG	0	9	0	8	0	0	0	Human	B	1.80746e-06	1.143024e-07	MF.9	0	1077460	NC	C	L	HC	0.0306	0.3768	1
3847	53	F	C	254	T	G	TTC	TGC	NonSyn	T254G	TG	0	9	0	8	0	0	0	Mosquito	A	3.486291e-06	1.611304e-07	MF.9	0	1109629	NC	C	L	HC	0.0306	0.3768	1
3848	53	F	C	254	T	G	TTC	TGC	NonSyn	T254G	TG	1	8	1	7	0	0	2.582794	Mosquito	B	2.030327e-06	1.119074e-07	MF.9	0	1141798	NC	C	N	HC	0.0306	0.3768	1
3849	53	F	F	255	C	T	TTC	TTT	Syn	C255T	CT	9	9	8	0	0.4949356	0.3728671	0.6487409	Mosquito	B	0.0002034795	7.793136e-06	MF.9	0.0003662696	1149814	S	C	D	HC	0.0306	0.3768	1
3850	53	F	I	253	T	A	TTC	ATC	NonSyn	T253A	TA	1	8	1	7	0	0	0	Mosquito	A	7.166782e-06	3.393327e-07	MF.9	2.563051e-05	1093919	C	C	L	HC	0.0306	0.3768	1
3851	53	F	L	255	C	G	TTC	TTG	NonSyn	C255G	CG	1	8	1	7	0	0	0	Human	A	1.604509e-06	2.564144e-07	MF.9	0	1045292	C	C	L	HC	0.0306	0.3768	1
3852	53	F	L	255	C	G	TTC	TTG	NonSyn	C255G	CG	1	8	1	7	0	0	5.025332	Human	B	1.455268e-06	7.022105e-08	MF.9	0	1077461	C	C	N	HC	0.0306	0.3768	1
3853	53	F	L	255	C	G	TTC	TTG	NonSyn	C255G	CG	0	9	0	8	0	0	0	Mosquito	A	2.20927e-06	9.740866e-08	MF.9	0	1109630	C	C	L	HC	0.0306	0.3768	1
3854	53	F	L	255	C	G	TTC	TTG	NonSyn	C255G	CG	1	8	1	7	3.061242	0	6.122483	Mosquito	B	1.513275e-06	1.225367e-07	MF.9	0	1141799	C	C	N	HC	0.0306	0.3768	1
3855	53	F	S	254	T	C	TTC	TCC	NonSyn	T254C	TC	9	0	8	0	0.8463871	0.5180142	1.242604	Human	B	8.638697e-06	3.744363e-07	MF.9	8.929688e-06	1068950	NC	C	N	HC	0.0306	0.3768	1
3856	53	F	S	254	T	C	TTC	TCC	NonSyn	T254C	TC	1	8	1	7	0	0	0	Mosquito	A	1.724887e-05	1.124953e-06	MF.9	2.784197e-05	1101119	NC	C	L	HC	0.0306	0.3768	1
3857	53	F	V	253	T	G	TTC	GTC	NonSyn	T253G	TG	1	8	1	7	0.6778094	0	1.355619	Human	B	1.80746e-06	1.143024e-07	MF.9	0	1077459	NC	C	N	HC	0.0306	0.3768	1
3858	53	F	V	253	T	G	TTC	GTC	NonSyn	T253G	TG	0	9	0	8	0	0	0	Mosquito	A	3.486291e-06	1.611304e-07	MF.9	0	1109628	NC	C	L	HC	0.0306	0.3768	1
3859	53	F	Y	254	T	A	TTC	TAC	NonSyn	T254A	TA	9	0	8	0	0.9135204	0.2202373	1.708611	Human	B	4.145682e-06	2.689648e-07	MF.9	2.678906e-05	1061751	C	C	N	HC	0.0306	0.3768	1
3860	53	F	Y	254	T	A	TTC	TAC	NonSyn	T254A	TA	1	8	1	7	0	0	0	Mosquito	A	7.166782e-06	3.393327e-07	MF.9	2.784197e-05	1093920	C	C	L	HC	0.0306	0.3768	1
3861	54	L	F	256	C	T	CTT	TTT	NonSyn	C256T	CT	9	9	8	0	0.5675046	0.1793962	0.8540474	Human	A	0.0002554735	2.089311e-05	MF.9	0.0003943129	1053308	C	C	D	HC	0.0253	0.3544	1
3862	54	L	F	256	C	T	CTT	TTT	NonSyn	C256T	CT	9	5	8	0	0.6462391	0.3015469	0.8600461	Mosquito	A	0.0001578562	6.997471e-06	MF.9	0.0002331682	1117646	C	C	D	HC	0.0253	0.3544	1
3863	54	L	F	256	C	T	CTT	TTT	NonSyn	C256T	CT	9	9	8	0	0.7103855	0.4327966	0.9879743	Mosquito	B	0.0002034795	7.793136e-06	MF.9	0.002153094	1149815	C	C	D	HC	0.0253	0.3544	1
3864	54	L	H	257	T	A	CTT	CAT	NonSyn	T257A	TA	0	9	0	8	0	0	0	Human	B	4.145682e-06	2.689648e-07	MF.9	0	1061754	C	C	L	HC	0.0253	0.3544	1
3865	54	L	H	257	T	A	CTT	CAT	NonSyn	T257A	TA	1	8	1	7	0	0	0	Mosquito	A	7.166782e-06	3.393327e-07	MF.9	0	1093923	C	C	L	HC	0.0253	0.3544	1
3866	54	L	H	257	T	A	CTT	CAT	NonSyn	T257A	TA	2	7	1	7	0.2551745	0	0.6379362	Mosquito	B	4.312763e-06	3.05777e-07	MF.9	0	1126092	C	C	D	HC	0.0253	0.3544	1
3867	54	L	I	256	C	A	CTT	ATT	NonSyn	C256A	CA	9	6	8	0	1.903178	0.9249727	3.279147	Human	A	2.985888e-06	1.847504e-07	MF.9	8.449562e-05	1029584	C	C	N	HC	0.0253	0.3544	1
3868	54	L	I	256	C	A	CTT	ATT	NonSyn	C256A	CA	9	8	8	0	1.030143	0.6647326	1.861359	Human	B	3.57888e-06	4.588673e-07	MF.9	8.274757e-05	1061753	C	C	N	HC	0.0253	0.3544	1
3869	54	L	I	256	C	A	CTT	ATT	NonSyn	C256A	CA	9	9	8	0	1.213952	0.7725712	1.671295	Mosquito	B	4.124727e-06	2.499298e-07	MF.9	0.0001065333	1126091	C	C	N	HC	0.0253	0.3544	1
3870	54	L	L	258	T	C	CTT	CTC	Syn	T258C	TC	9	6	8	0	0.9994743	0.5622022	1.234717	Human	B	8.638697e-06	3.744363e-07	MF.9	0.0001053332	1068952	S	C	N	HC	0.0253	0.3544	1
3871	54	L	L	258	T	G	CTT	CTG	Syn	T258G	TG	1	8	1	7	0	0	0	Mosquito	A	3.486291e-06	1.611304e-07	MF.9	3.062224e-05	1109633	S	C	L	HC	0.0253	0.3544	1
3872	54	L	P	257	T	C	CTT	CCT	NonSyn	T257C	TC	3	6	0	8	0	0	0	Human	A	8.304354e-06	4.831455e-07	MF.9	0	1036782	C	C	L	HC	0.0253	0.3544	1
3873	54	L	P	257	T	C	CTT	CCT	NonSyn	T257C	TC	5	4	0	8	0	0	0	Human	B	8.638697e-06	3.744363e-07	MF.9	4.245437e-06	1068951	C	C	L	HC	0.0253	0.3544	1
3874	54	L	P	257	T	C	CTT	CCT	NonSyn	T257C	TC	2	7	1	7	0	0	0	Mosquito	A	1.724887e-05	1.124953e-06	MF.9	3.022335e-05	1101120	C	C	L	HC	0.0253	0.3544	1
3875	54	L	P	257	T	C	CTT	CCT	NonSyn	T257C	TC	2	7	1	7	0.1581768	0	0.3954421	Mosquito	B	8.756502e-06	5.645669e-07	MF.9	1.090554e-05	1133289	C	C	D	HC	0.0253	0.3544	1
3876	54	L	R	257	T	G	CTT	CGT	NonSyn	T257G	TG	1	8	1	7	0	0	0	Mosquito	A	3.486291e-06	1.611304e-07	MF.9	0	1109632	C	C	L	HC	0.0253	0.3544	1
3877	54	L	V	256	C	G	CTT	GTT	NonSyn	C256G	CG	0	9	0	8	0	0	0	Human	A	1.604509e-06	2.564144e-07	MF.9	0	1045293	C	C	L	HC	0.0253	0.3544	1
3878	54	L	V	256	C	G	CTT	GTT	NonSyn	C256G	CG	0	9	0	8	0	0	0	Mosquito	A	2.20927e-06	9.740866e-08	MF.9	0	1109631	C	C	L	HC	0.0253	0.3544	1
3879	54	L	V	256	C	G	CTT	GTT	NonSyn	C256G	CG	1	8	1	7	2.669212	0	6.673031	Mosquito	B	1.513275e-06	1.225367e-07	MF.9	0	1141800	C	C	N	HC	0.0253	0.3544	1
3880	55	R	C	259	C	T	CGT	TGT	NonSyn	C259T	CT	9	9	8	0	0.4212638	0.1229629	0.8344449	Human	B	0.0002635581	1.843403e-05	MF.9	0.000374642	1085478	C	C	D	HC	0.0248	0.3326	1
3881	55	R	C	259	C	T	CGT	TGT	NonSyn	C259T	CT	9	7	8	0	0.3970148	0.2653464	0.5529065	Mosquito	A	0.0001578562	6.997471e-06	MF.9	0.0007114695	1117647	C	C	D	HC	0.0248	0.3326	1
3882	55	R	C	259	C	T	CGT	TGT	NonSyn	C259T	CT	9	9	8	0	0.6062621	0.4341132	0.7784109	Mosquito	B	0.0002034795	7.793136e-06	MF.9	0.0006417144	1149816	C	C	D	HC	0.0248	0.3326	1
3883	55	R	G	259	C	G	CGT	GGT	NonSyn	C259G	CG	1	8	1	7	0.6094037	0	1.523509	Human	A	1.604509e-06	2.564144e-07	MF.9	0	1045296	C	C	N	HC	0.0248	0.3326	1
3884	55	R	G	259	C	G	CGT	GGT	NonSyn	C259G	CG	1	8	1	7	2.039017	0	4.078034	Human	B	1.455268e-06	7.022105e-08	MF.9	0	1077465	C	C	N	HC	0.0248	0.3326	1
3885	55	R	G	259	C	G	CGT	GGT	NonSyn	C259G	CG	1	8	1	7	0	0	0	Mosquito	A	2.20927e-06	9.740866e-08	MF.9	2.964456e-05	1109634	C	C	L	HC	0.0248	0.3326	1
3886	55	R	H	260	G	A	CGT	CAT	NonSyn	G260A	GA	9	4	8	0	0.7347321	0.3216066	1.147858	Human	B	7.684204e-06	4.645403e-07	MF.9	2.885931e-05	1061757	C	C	N	HC	0.0248	0.3326	1
3887	55	R	H	260	G	A	CGT	CAT	NonSyn	G260A	GA	9	7	8	0	0.8893711	0.6412435	1.134569	Mosquito	A	8.774931e-06	2.38219e-07	MF.9	9.29109e-05	1093926	C	C	N	HC	0.0248	0.3326	1
3888	55	R	H	260	G	A	CGT	CAT	NonSyn	G260A	GA	9	9	8	0	0.9955332	0.7130041	1.31007	Mosquito	B	6.112924e-06	3.730988e-07	MF.9	0.0002039557	1126095	C	C	N	HC	0.0248	0.3326	1
3889	55	R	L	260	G	T	CGT	CTT	NonSyn	G260T	GT	9	1	8	0	0.5575846	0.301534	2.391473	Human	B	7.052585e-06	4.58263e-07	MF.9	1.649104e-05	1085479	C	C	N	HC	0.0248	0.3326	1
3890	55	R	P	260	G	C	CGT	CCT	NonSyn	G260C	GC	2	7	1	7	0	0	0	Mosquito	B	3.432927e-06	9.570197e-07	MF.9	9.949061e-06	1133291	C	C	L	HC	0.0248	0.3326	1
3891	55	R	R	261	T	C	CGT	CGC	Syn	T261C	TC	9	8	8	0	1.228172	0.5445168	1.990779	Human	A	8.304354e-06	4.831455e-07	MF.9	3.545399e-05	1036785	S	C	N	HC	0.0248	0.3326	1
3892	55	R	R	261	T	G	CGT	CGG	Syn	T261G	TG	2	7	1	7	0	0	3.286357	Human	A	1.799189e-06	1.556942e-07	MF.9	0	1045297	S	C	N	HC	0.0248	0.3326	1
3893	55	R	R	261	T	A	CGT	CGA	Syn	T261A	TA	8	2	8	0	1.184676	0.3591982	2.128442	Human	B	4.145682e-06	2.689648e-07	MF.9	7.628653e-05	1061758	S	C	N	HC	0.0248	0.3326	1
3894	55	R	R	261	T	C	CGT	CGC	Syn	T261C	TC	9	8	8	0	1.087249	0.6465965	1.562271	Human	B	8.638697e-06	3.744363e-07	MF.9	8.833177e-05	1068954	S	C	N	HC	0.0248	0.3326	1
3895	55	R	R	261	T	C	CGT	CGC	Syn	T261C	TC	9	1	8	0	0.9718103	0.273079	1.615228	Mosquito	A	1.724887e-05	1.124953e-06	MF.9	5.984978e-05	1101123	S	C	N	HC	0.0248	0.3326	1
3896	55	R	R	261	T	G	CGT	CGG	Syn	T261G	TG	0	9	0	8	0	0	0	Mosquito	A	3.486291e-06	1.611304e-07	MF.9	0	1109635	S	C	L	HC	0.0248	0.3326	1
3897	56	F	C	263	T	G	TTC	TGC	NonSyn	T263G	TG	1	8	1	7	0	0	0	Mosquito	A	3.486291e-06	1.611304e-07	MF.9	3.042751e-05	1109637	NC	C	L	HC	0.0153	0.3032	1
3898	56	F	F	264	C	T	TTC	TTT	Syn	C264T	CT	9	9	8	0	0.2414984	0.1003718	0.3530683	Human	B	0.0002635581	1.843403e-05	MF.9	0.000461285	1085480	S	C	D	HC	0.0153	0.3032	1
3899	56	F	L	262	T	C	TTC	CTC	NonSyn	T262C	TC	9	5	8	0	0.814043	0.6520215	1.138086	Human	A	8.304354e-06	4.831455e-07	MF.9	1.455308e-05	1036786	C	C	N	HC	0.0153	0.3032	1
3900	56	F	L	262	T	C	TTC	CTC	NonSyn	T262C	TC	9	2	8	0	1.206123	0.3167388	1.80499	Human	B	8.638697e-06	3.744363e-07	MF.9	4.079867e-05	1068955	C	C	N	HC	0.0153	0.3032	1
3901	56	F	L	264	C	G	TTC	TTG	NonSyn	C264G	CG	8	1	8	0	0.7209297	0.454117	1.038582	Mosquito	B	1.513275e-06	1.225367e-07	MF.9	8.601115e-06	1141807	C	C	N	HC	0.0153	0.3032	1
3902	56	F	S	263	T	C	TTC	TCC	NonSyn	T263C	TC	9	1	8	0	1.05392	0.1795101	1.768254	Human	A	8.304354e-06	4.831455e-07	MF.9	2.378585e-05	1036787	NC	C	N	HC	0.0153	0.3032	1
3903	56	F	V	262	T	G	TTC	GTC	NonSyn	T262G	TG	1	8	1	7	0.5406248	0	1.08125	Human	B	1.80746e-06	1.143024e-07	MF.9	0	1077467	NC	C	N	HC	0.0153	0.3032	1
3904	56	F	V	262	T	G	TTC	GTC	NonSyn	T262G	TG	1	8	1	7	0	0	0	Mosquito	A	3.486291e-06	1.611304e-07	MF.9	0	1109636	NC	C	L	HC	0.0153	0.3032	1
3905	57	L	I	265	C	A	CTA	ATA	NonSyn	C265A	CA	9	9	8	0	0.8630033	0.5730682	1.219497	Mosquito	A	6.508077e-06	1.996644e-07	MF.9	0.0009003999	1093931	C	C	N	HC	0.0244	0.2756	1
3906	57	L	I	265	C	A	CTA	ATA	NonSyn	C265A	CA	9	8	8	0	0.8358698	0.4336292	1.182076	Mosquito	B	4.124727e-06	2.499298e-07	MF.9	5.510086e-05	1126100	C	C	N	HC	0.0244	0.2756	1
3907	57	L	L	267	A	G	CTA	CTG	Syn	A267G	AG	9	8	8	0	0.7753978	0.6548163	0.9221462	Human	A	1.14325e-05	8.091075e-07	MF.9	1.254385e-05	1045303	S	C	D	HC	0.0244	0.2756	1
3908	57	L	L	267	A	T	CTA	CTT	Syn	A267T	AT	2	7	1	7	0.3136478	0	0.7841195	Human	A	2.37871e-06	1.833534e-07	MF.9	0	1053313	S	C	D	HC	0.0244	0.2756	1
3909	57	L	L	267	A	G	CTA	CTG	Syn	A267G	AG	9	7	8	0	0.8311672	0.5066987	1.049316	Human	B	1.213945e-05	3.148199e-07	MF.9	1.902696e-05	1077472	S	C	N	HC	0.0244	0.2756	1
3910	57	L	L	267	A	C	CTA	CTC	Syn	A267C	AC	0	9	0	8	0	0	0	Mosquito	A	3.286083e-06	1.701643e-07	MF.9	0	1101127	S	C	L	HC	0.0244	0.2756	1
3911	57	L	L	267	A	T	CTA	CTT	Syn	A267T	AT	0	9	0	8	0	0	0	Mosquito	A	2.875636e-06	1.187371e-07	MF.9	0	1117651	S	C	L	HC	0.0244	0.2756	1
3912	57	L	P	266	T	C	CTA	CCA	NonSyn	T266C	TC	9	8	8	0	1.061134	0.7842951	1.454126	Human	A	8.304354e-06	4.831455e-07	MF.9	2.544454e-05	1036788	C	C	N	HC	0.0244	0.2756	1
3913	57	L	P	266	T	C	CTA	CCA	NonSyn	T266C	TC	9	7	8	0	0.9261263	0.5070679	1.398088	Human	B	8.638697e-06	3.744363e-07	MF.9	9.771656e-05	1068957	C	C	N	HC	0.0244	0.2756	1
3914	57	L	P	266	T	C	CTA	CCA	NonSyn	T266C	TC	9	8	8	0	1.080943	0.744652	1.384686	Mosquito	B	8.756502e-06	5.645669e-07	MF.9	0.0001478597	1133295	C	C	N	HC	0.0244	0.2756	1
3915	57	L	R	266	T	G	CTA	CGA	NonSyn	T266G	TG	1	8	1	7	0.3221913	0	0.8054781	Human	A	1.799189e-06	1.556942e-07	MF.9	0	1045302	C	C	D	HC	0.0244	0.2756	1
3916	57	L	R	266	T	G	CTA	CGA	NonSyn	T266G	TG	1	8	1	7	0.2398513	0	0.5996282	Human	B	1.80746e-06	1.143024e-07	MF.9	0	1077471	C	C	D	HC	0.0244	0.2756	1
3917	57	L	R	266	T	G	CTA	CGA	NonSyn	T266G	TG	0	9	0	8	0	0	0	Mosquito	A	3.486291e-06	1.611304e-07	MF.9	0	1109640	C	C	L	HC	0.0244	0.2756	1
3918	57	L	R	266	T	G	CTA	CGA	NonSyn	T266G	TG	0	9	0	8	0	0	0	Mosquito	B	2.030327e-06	1.119074e-07	MF.9	0	1141809	C	C	L	HC	0.0244	0.2756	1
3919	57	L	V	265	C	G	CTA	GTA	NonSyn	C265G	CG	9	0	8	0	0.7869249	0.4082903	1.150252	Human	B	1.455268e-06	7.022105e-08	MF.9	1.63041e-05	1077470	C	C	N	HC	0.0244	0.2756	1
3920	58	T	A	268	A	G	ACA	GCA	NonSyn	A268G	AG	9	7	8	0	0.9579781	0.511729	1.413529	Human	A	1.14325e-05	8.091075e-07	MF.9	1.286339e-05	1045304	C	C	N	HC	0.0494	0.2557	1
3921	58	T	A	268	A	G	ACA	GCA	NonSyn	A268G	AG	9	7	8	0	1.206953	0.3847014	2.054974	Human	B	1.213945e-05	3.148199e-07	MF.9	4.583949e-05	1077473	C	C	N	HC	0.0494	0.2557	1
3922	58	T	A	268	A	G	ACA	GCA	NonSyn	A268G	AG	9	7	8	0	1.312708	0.7270958	1.834898	Mosquito	B	1.180995e-05	6.889282e-07	MF.9	8.721437e-05	1141811	C	C	N	HC	0.0494	0.2557	1
3923	58	T	R	269	C	G	ACA	AGA	NonSyn	C269G	CG	1	8	1	7	0	0	0	Human	B	1.455268e-06	7.022105e-08	MF.9	0	1077474	C	C	L	HC	0.0494	0.2557	1
3924	58	T	R	269	C	G	ACA	AGA	NonSyn	C269G	CG	0	9	0	8	0	0	0	Mosquito	A	2.20927e-06	9.740866e-08	MF.9	0	1109643	C	C	L	HC	0.0494	0.2557	1
3925	58	T	S	268	A	T	ACA	TCA	NonSyn	A268T	AT	1	8	0	8	0	0	0	Mosquito	A	2.875636e-06	1.187371e-07	MF.9	0	1117652	C	C	L	HC	0.0494	0.2557	1
3926	58	T	T	270	A	G	ACA	ACG	Syn	A270G	AG	9	7	8	0	1.42912	0.7143439	2.087706	Human	A	1.14325e-05	8.091075e-07	MF.9	1.248881e-05	1045306	S	C	N	HC	0.0494	0.2557	1
3927	58	T	T	270	A	G	ACA	ACG	Syn	A270G	AG	9	8	8	0	0.6925747	0.5052374	0.8249985	Human	B	1.213945e-05	3.148199e-07	MF.9	1.93074e-05	1077475	S	C	D	HC	0.0494	0.2557	1
3928	58	T	T	270	A	C	ACA	ACC	Syn	A270C	AC	1	8	0	8	0	0	0	Mosquito	A	3.286083e-06	1.701643e-07	MF.9	0	1101129	S	C	L	HC	0.0494	0.2557	1
3929	58	T	T	270	A	T	ACA	ACT	Syn	A270T	AT	2	7	1	7	0	0	0	Mosquito	A	2.875636e-06	1.187371e-07	MF.9	0	1117654	S	C	L	HC	0.0494	0.2557	1
3930	59	I	F	271	A	T	ATC	TTC	NonSyn	A271T	AT	1	8	1	7	1.684856	0	4.21214	Mosquito	A	2.875636e-06	1.187371e-07	MF.9	0	1117655	C	C	N	HC	0.0306	0.2402	1
3931	59	I	I	273	C	T	ATC	ATT	Syn	C273T	CT	9	9	8	0	0.4779781	0.3473931	0.8081116	Human	B	0.0002635581	1.843403e-05	MF.9	0.0004658905	1085487	S	C	D	HC	0.0306	0.2402	1
3932	59	I	I	273	C	A	ATC	ATA	Syn	C273A	CA	1	8	1	7	0	0	0	Mosquito	A	6.508077e-06	1.996644e-07	MF.9	0	1093935	S	C	L	HC	0.0306	0.2402	1
3933	59	I	I	273	C	T	ATC	ATT	Syn	C273T	CT	9	9	8	0	0.6586058	0.3263936	1.085181	Mosquito	A	0.0001578562	6.997471e-06	MF.9	0.0003258491	1117656	S	C	N	HC	0.0306	0.2402	1
3934	59	I	I	273	C	T	ATC	ATT	Syn	C273T	CT	9	9	8	0	0.6629334	0.5086438	0.7739849	Mosquito	B	0.0002034795	7.793136e-06	MF.9	0.0006367026	1149825	S	C	D	HC	0.0306	0.2402	1
3935	59	I	M	273	C	G	ATC	ATG	NonSyn	C273G	CG	0	9	0	8	0	0	0	Human	A	1.604509e-06	2.564144e-07	MF.9	0	1045309	C	C	L	HC	0.0306	0.2402	1
3936	59	I	M	273	C	G	ATC	ATG	NonSyn	C273G	CG	1	8	1	7	3.008155	0	7.520387	Mosquito	A	2.20927e-06	9.740866e-08	MF.9	0	1109647	C	C	N	HC	0.0306	0.2402	1
3937	59	I	N	272	T	A	ATC	AAC	NonSyn	T272A	TA	1	8	1	7	0	0	0	Mosquito	A	7.166782e-06	3.393327e-07	MF.9	0	1093934	C	C	L	HC	0.0306	0.2402	1
3938	59	I	S	272	T	G	ATC	AGC	NonSyn	T272G	TG	1	8	1	7	0	0	0	Mosquito	A	3.486291e-06	1.611304e-07	MF.9	0	1109646	NC	C	L	HC	0.0306	0.2402	1
3939	59	I	T	272	T	C	ATC	ACC	NonSyn	T272C	TC	9	9	8	0	1.590084	1.011184	4.18279	Human	A	8.304354e-06	4.831455e-07	MF.9	0.0001307908	1036793	NC	C	B	HC	0.0306	0.2402	1
3940	59	I	T	272	T	C	ATC	ACC	NonSyn	T272C	TC	9	8	8	0	1.109888	0.7454266	1.527116	Human	B	8.638697e-06	3.744363e-07	MF.9	6.287832e-05	1068962	NC	C	N	HC	0.0306	0.2402	1
3941	59	I	T	272	T	C	ATC	ACC	NonSyn	T272C	TC	9	5	8	0	1.081477	0.3863672	1.682411	Mosquito	B	8.756502e-06	5.645669e-07	MF.9	2.993653e-05	1133300	NC	C	N	HC	0.0306	0.2402	1
3942	59	I	V	271	A	G	ATC	GTC	NonSyn	A271G	AG	9	8	8	0	2.519687	0.4949106	3.532075	Human	A	1.14325e-05	8.091075e-07	MF.9	0.001022187	1045307	C	C	N	HC	0.0306	0.2402	1
3943	59	I	V	271	A	G	ATC	GTC	NonSyn	A271G	AG	9	3	8	0	0.6439663	0.3167537	1.755102	Human	B	1.213945e-05	3.148199e-07	MF.9	2.354058e-05	1077476	C	C	N	HC	0.0306	0.2402	1
3944	59	I	V	271	A	G	ATC	GTC	NonSyn	A271G	AG	9	4	8	0	0.6920631	0.5449395	0.8948015	Mosquito	B	1.180995e-05	6.889282e-07	MF.9	0.0004512819	1141814	C	C	D	HC	0.0306	0.2402	1
3945	60	P	L	275	C	T	CCA	CTA	NonSyn	C275T	CT	9	9	8	0	1.386632	0.8358253	2.899153	Human	A	0.0002554735	2.089311e-05	MF.9	0.0018224	1053320	C	C	N	HC	0.0356	0.2351	1
3946	60	P	L	275	C	T	CCA	CTA	NonSyn	C275T	CT	9	9	8	0	0.75934	0.5261208	0.9820725	Human	B	0.0002635581	1.843403e-05	MF.9	0.0007085657	1085489	C	C	D	HC	0.0356	0.2351	1
3947	60	P	L	275	C	T	CCA	CTA	NonSyn	C275T	CT	9	9	8	0	0.6116921	0.3672314	0.8495295	Mosquito	A	0.0001578562	6.997471e-06	MF.9	0.000288949	1117658	C	C	D	HC	0.0356	0.2351	1
3948	60	P	L	275	C	T	CCA	CTA	NonSyn	C275T	CT	9	9	8	0	0.6296448	0.507091	0.7855051	Mosquito	B	0.0002034795	7.793136e-06	MF.9	0.0005395111	1149827	C	C	D	HC	0.0356	0.2351	1
3949	60	P	R	275	C	G	CCA	CGA	NonSyn	C275G	CG	9	8	8	0	1.671766	0.8679674	2.475564	Human	A	1.604509e-06	2.564144e-07	MF.9	3.859199e-05	1045311	C	C	N	HC	0.0356	0.2351	1
3950	60	P	R	275	C	G	CCA	CGA	NonSyn	C275G	CG	9	9	8	0	0.8786333	0.6233687	1.254344	Human	B	1.455268e-06	7.022105e-08	MF.9	7.546853e-05	1077480	C	C	N	HC	0.0356	0.2351	1
3951	60	P	R	275	C	G	CCA	CGA	NonSyn	C275G	CG	9	5	8	0	1.360038	0.5085859	2.198459	Mosquito	B	1.513275e-06	1.225367e-07	MF.9	3.623582e-05	1141818	C	C	N	HC	0.0356	0.2351	1
3952	60	P	S	274	C	T	CCA	TCA	NonSyn	C274T	CT	9	9	8	0	0.6641409	0.4365771	0.9279533	Human	A	0.0002554735	2.089311e-05	MF.9	0.0003609302	1053319	C	C	D	HC	0.0356	0.2351	1
3953	60	P	S	274	C	T	CCA	TCA	NonSyn	C274T	CT	9	9	8	0	0.5763419	0.3987147	0.733166	Human	B	0.0002635581	1.843403e-05	MF.9	0.0005594489	1085488	C	C	D	HC	0.0356	0.2351	1
3954	60	P	S	274	C	T	CCA	TCA	NonSyn	C274T	CT	9	9	8	0	0.7551824	0.3057835	1.017668	Mosquito	A	0.0001578562	6.997471e-06	MF.9	0.0003598106	1117657	C	C	N	HC	0.0356	0.2351	1
3955	60	P	S	274	C	T	CCA	TCA	NonSyn	C274T	CT	9	9	8	0	0.647526	0.5542372	0.7505925	Mosquito	B	0.0002034795	7.793136e-06	MF.9	0.0005157696	1149826	C	C	D	HC	0.0356	0.2351	1
3956	60	P	T	274	C	A	CCA	ACA	NonSyn	C274A	CA	9	7	8	0	1.120249	0.5543526	1.891869	Human	A	2.985888e-06	1.847504e-07	MF.9	2.578073e-05	1029598	NC	C	N	HC	0.0356	0.2351	1
3957	60	P	T	274	C	A	CCA	ACA	NonSyn	C274A	CA	9	9	8	0	1.055481	0.979862	1.148962	Human	B	3.57888e-06	4.588673e-07	MF.9	7.260024e-05	1061767	NC	C	N	HC	0.0356	0.2351	1
3958	60	P	T	274	C	A	CCA	ACA	NonSyn	C274A	CA	9	4	8	0	2.099226	0.5860867	3.576568	Mosquito	B	4.124727e-06	2.499298e-07	MF.9	1.624471e-05	1126105	NC	C	N	HC	0.0356	0.2351	1
3959	61	P	A	277	C	G	CCA	GCA	NonSyn	C277G	CG	1	8	1	7	0	0	0	Mosquito	A	2.20927e-06	9.740866e-08	MF.9	0	1109651	NC	C	L	HC	0.0631	0.2276	1
3960	61	P	L	278	C	T	CCA	CTA	NonSyn	C278T	CT	9	9	8	0	0.4270701	0.0719054	0.8838298	Human	B	0.0002635581	1.843403e-05	MF.9	0.0004206578	1085492	C	C	D	HC	0.0631	0.2276	1
3961	61	P	P	279	A	C	CCA	CCC	Syn	A279C	AC	9	4	8	0	2.219794	0.7791754	3.547958	Human	A	2.326514e-06	2.040447e-07	MF.9	1.246344e-05	1036795	S	C	N	HC	0.0631	0.2276	1
3962	61	P	P	279	A	G	CCA	CCG	Syn	A279G	AG	9	8	8	0	0.7005711	0.2855101	1.434406	Human	A	1.14325e-05	8.091075e-07	MF.9	4.15448e-05	1045315	S	C	N	HC	0.0631	0.2276	1
3963	61	P	P	279	A	C	CCA	CCC	Syn	A279C	AC	9	5	8	0	1.163975	0.3649939	4.185647	Human	B	2.288044e-06	1.737362e-07	MF.9	3.414411e-05	1068964	S	C	N	HC	0.0631	0.2276	1
3964	61	P	P	279	A	G	CCA	CCG	Syn	A279G	AG	9	8	8	0	0.9388056	0.6670353	1.247692	Human	B	1.213945e-05	3.148199e-07	MF.9	7.682426e-05	1077484	S	C	N	HC	0.0631	0.2276	1
3965	61	P	P	279	A	T	CCA	CCT	Syn	A279T	AT	9	0	8	0	1.070847	0.6670339	1.390679	Human	B	2.589251e-06	1.43343e-07	MF.9	4.268014e-06	1085493	S	C	N	HC	0.0631	0.2276	1
3966	61	P	Q	278	C	A	CCA	CAA	NonSyn	C278A	CA	9	0	8	0	1.388671	0.4497071	1.922688	Human	A	2.985888e-06	1.847504e-07	MF.9	8.443129e-06	1029601	C	C	N	HC	0.0631	0.2276	1
3967	61	P	Q	278	C	A	CCA	CAA	NonSyn	C278A	CA	9	0	8	0	1.274232	0.2375693	2.494732	Human	B	3.57888e-06	4.588673e-07	MF.9	1.752741e-05	1061770	C	C	N	HC	0.0631	0.2276	1
3968	61	P	R	278	C	G	CCA	CGA	NonSyn	C278G	CG	1	8	1	7	0	0	4.169219	Human	A	1.604509e-06	2.564144e-07	MF.9	0	1045314	C	C	N	HC	0.0631	0.2276	1
3969	61	P	R	278	C	G	CCA	CGA	NonSyn	C278G	CG	1	8	1	7	0.9903594	0	1.980719	Human	B	1.455268e-06	7.022105e-08	MF.9	0	1077483	C	C	N	HC	0.0631	0.2276	1
3970	61	P	R	278	C	G	CCA	CGA	NonSyn	C278G	CG	1	8	1	7	1.255981	0	3.139953	Mosquito	A	2.20927e-06	9.740866e-08	MF.9	0	1109652	C	C	N	HC	0.0631	0.2276	1
3971	61	P	S	277	C	T	CCA	TCA	NonSyn	C277T	CT	9	9	8	0	0.4703617	0.1804124	0.7341417	Human	B	0.0002635581	1.843403e-05	MF.9	0.0004797704	1085491	C	C	D	HC	0.0631	0.2276	1
3972	61	P	S	277	C	T	CCA	TCA	NonSyn	C277T	CT	9	9	8	0	0.3124566	0.1665478	0.6177439	Mosquito	B	0.0002034795	7.793136e-06	MF.9	0.000247244	1149829	C	C	D	HC	0.0631	0.2276	1
3973	61	P	T	277	C	A	CCA	ACA	NonSyn	C277A	CA	9	8	8	0	1.20812	0.73854	1.67591	Human	A	2.985888e-06	1.847504e-07	MF.9	3.024908e-05	1029600	NC	C	N	HC	0.0631	0.2276	1
3974	61	P	T	277	C	A	CCA	ACA	NonSyn	C277A	CA	9	9	8	0	0.8770514	0.5312793	1.109678	Human	B	3.57888e-06	4.588673e-07	MF.9	7.282229e-05	1061769	NC	C	N	HC	0.0631	0.2276	1
3975	61	P	T	277	C	A	CCA	ACA	NonSyn	C277A	CA	8	5	8	0	2.378297	0.3199933	3.971542	Mosquito	B	4.124727e-06	2.499298e-07	MF.9	5.101861e-05	1126107	NC	C	N	HC	0.0631	0.2276	1
3976	62	T	A	280	A	G	ACA	GCA	NonSyn	A280G	AG	9	4	8	0	0.7974648	0.66866	2.390548	Human	A	1.14325e-05	8.091075e-07	MF.9	3.016149e-05	1045316	C	C	N	HC	0.0543	0.2120	1
3977	62	T	A	280	A	G	ACA	GCA	NonSyn	A280G	AG	9	5	8	0	1.107006	0.6547638	1.675173	Human	B	1.213945e-05	3.148199e-07	MF.9	2.096366e-05	1077485	C	C	N	HC	0.0543	0.2120	1
3978	62	T	I	281	C	T	ACA	ATA	NonSyn	C281T	CT	9	9	8	0	0.2175169	0.0634865	0.3715474	Mosquito	B	0.0002034795	7.793136e-06	MF.9	0.0003312741	1149833	NC	C	D	HC	0.0543	0.2120	1
3979	62	T	K	281	C	A	ACA	AAA	NonSyn	C281A	CA	0	9	0	8	0	0	0	Mosquito	A	6.508077e-06	1.996644e-07	MF.9	0	1093940	C	C	L	HC	0.0543	0.2120	1
3980	62	T	P	280	A	C	ACA	CCA	NonSyn	A280C	AC	9	5	8	0	1.926494	0.7609416	3.254449	Human	A	2.326514e-06	2.040447e-07	MF.9	4.739663e-05	1036796	NC	C	N	HC	0.0543	0.2120	1
3981	62	T	P	280	A	C	ACA	CCA	NonSyn	A280C	AC	8	3	8	0	1.094528	0.4652312	1.863759	Human	B	2.288044e-06	1.737362e-07	MF.9	3.354185e-05	1068965	NC	C	N	HC	0.0543	0.2120	1
3982	62	T	P	280	A	C	ACA	CCA	NonSyn	A280C	AC	9	4	8	0	1.674709	0.9157633	2.567134	Mosquito	B	2.391816e-06	1.394774e-07	MF.9	0.0001223845	1133303	NC	C	N	HC	0.0543	0.2120	1
3983	62	T	R	281	C	G	ACA	AGA	NonSyn	C281G	CG	0	9	0	8	0	0	0	Mosquito	A	2.20927e-06	9.740866e-08	MF.9	0	1109655	C	C	L	HC	0.0543	0.2120	1
3984	62	T	S	280	A	T	ACA	TCA	NonSyn	A280T	AT	9	6	8	0	3.315886	0.3924151	6.239357	Human	A	2.37871e-06	1.833534e-07	MF.9	3.016149e-05	1053325	C	C	N	HC	0.0543	0.2120	1
3985	62	T	S	280	A	T	ACA	TCA	NonSyn	A280T	AT	9	5	8	0	0.6194631	0.1706084	0.9875207	Human	B	2.589251e-06	1.43343e-07	MF.9	7.127644e-05	1085494	C	C	D	HC	0.0543	0.2120	1
3986	62	T	T	282	A	G	ACA	ACG	Syn	A282G	AG	9	3	8	0	0.4297778	0.2556015	1.198469	Human	A	1.14325e-05	8.091075e-07	MF.9	2.832265e-05	1045318	S	C	N	HC	0.0543	0.2120	1
3987	62	T	T	282	A	T	ACA	ACT	Syn	A282T	AT	9	0	8	0	1.231848	0.6049283	4.104904	Human	A	2.37871e-06	1.833534e-07	MF.9	1.213828e-05	1053327	S	C	N	HC	0.0543	0.2120	1
3988	62	T	T	282	A	G	ACA	ACG	Syn	A282G	AG	9	1	8	0	0.4498358	0.1720134	0.7809898	Human	B	1.213945e-05	3.148199e-07	MF.9	1.77668e-05	1077487	S	C	D	HC	0.0543	0.2120	1
3989	63	A	A	285	A	T	GCA	GCT	Syn	A285T	AT	9	7	8	0	1.733154	0.5581858	2.908122	Human	A	2.37871e-06	1.833534e-07	MF.9	3.643371e-05	1053330	S	C	N	HC	0.0690	0.1984	1
3990	63	A	A	285	A	T	GCA	GCT	Syn	A285T	AT	9	7	8	0	0.7256295	0.408155	2.749924	Human	B	2.589251e-06	1.43343e-07	MF.9	0.0002619983	1085499	S	C	N	HC	0.0690	0.1984	1
3991	63	A	A	285	A	C	GCA	GCC	Syn	A285C	AC	9	2	8	0	0.810475	0.4370051	1.067455	Mosquito	B	2.391816e-06	1.394774e-07	MF.9	5.405483e-05	1133306	S	C	N	HC	0.0690	0.1984	1
3992	63	A	E	284	C	A	GCA	GAA	NonSyn	C284A	CA	9	5	8	0	1.795345	0.5828807	3.311261	Human	A	2.985888e-06	1.847504e-07	MF.9	4.099621e-06	1029604	C	C	N	HC	0.0690	0.1984	1
3993	63	A	G	284	C	G	GCA	GGA	NonSyn	C284G	CG	9	3	8	0	1.270874	0.6261654	2.034968	Human	B	1.455268e-06	7.022105e-08	MF.9	2.475848e-05	1077488	C	C	N	HC	0.0690	0.1984	1
3994	63	A	G	284	C	G	GCA	GGA	NonSyn	C284G	CG	0	9	0	8	0	0	0	Mosquito	A	2.20927e-06	9.740866e-08	MF.9	0	1109657	C	C	L	HC	0.0690	0.1984	1
3995	63	A	S	283	G	T	GCA	TCA	NonSyn	G283T	GT	9	9	8	0	1.080434	0.6816434	1.570585	Human	B	7.052585e-06	4.58263e-07	MF.9	0.0001465216	1085497	C	C	N	HC	0.0690	0.1984	1
3996	63	A	S	283	G	T	GCA	TCA	NonSyn	G283T	GT	9	4	8	0	1.747388	0.5657575	3.259035	Mosquito	B	7.493022e-06	1.393832e-06	MF.9	8.823562e-05	1149835	C	C	N	HC	0.0690	0.1984	1
3997	63	A	T	283	G	A	GCA	ACA	NonSyn	G283A	GA	9	9	8	0	0.986335	0.5408256	1.621335	Human	A	6.69739e-06	4.668841e-07	MF.9	4.564429e-05	1029603	C	C	N	HC	0.0690	0.1984	1
3998	63	A	T	283	G	A	GCA	ACA	NonSyn	G283A	GA	9	8	8	0	1.193527	0.5774505	1.889387	Human	B	7.684204e-06	4.645403e-07	MF.9	6.349268e-05	1061772	C	C	N	HC	0.0690	0.1984	1
3999	63	A	V	284	C	T	GCA	GTA	NonSyn	C284T	CT	9	9	8	0	0.3281072	0.1929163	0.4810972	Mosquito	A	0.0001578562	6.997471e-06	MF.9	0.00019992	1117667	NC	C	D	HC	0.0690	0.1984	1
4000	64	G	A	287	G	C	GGG	GCG	NonSyn	G287C	GC	1	8	1	7	0.357499	0	0.8937476	Mosquito	B	3.432927e-06	9.570197e-07	MF.9	0	1133308	C	C	D	HC	0.1323	0.1899	1
4001	64	G	E	287	G	A	GGG	GAG	NonSyn	G287A	GA	8	8	8	0	1.448501	0.85739	2.170736	Human	B	7.684204e-06	4.645403e-07	MF.9	3.659518e-05	1061775	C	C	N	HC	0.1323	0.1899	1
4002	64	G	G	288	G	A	GGG	GGA	Syn	G288A	GA	9	8	8	0	0.8728317	0.5444858	1.428283	Human	A	6.69739e-06	4.668841e-07	MF.9	0.0001047059	1029607	S	C	N	HC	0.1323	0.1899	1
4003	64	G	G	288	G	A	GGG	GGA	Syn	G288A	GA	9	6	8	0	1.318045	0.5557203	1.889262	Human	B	7.684204e-06	4.645403e-07	MF.9	8.127851e-05	1061776	S	C	N	HC	0.1323	0.1899	1
4004	64	G	G	288	G	T	GGG	GGT	Syn	G288T	GT	3	6	1	7	0	0	0	Human	B	7.052585e-06	4.58263e-07	MF.9	1.015981e-05	1085502	S	C	L	HC	0.1323	0.1899	1
4005	64	G	G	288	G	C	GGG	GGC	Syn	G288C	GC	1	8	0	8	0	0	0	Mosquito	A	1.263716e-05	7.038203e-07	MF.9	0	1101140	S	C	L	HC	0.1323	0.1899	1
4006	64	G	G	288	G	T	GGG	GGT	Syn	G288T	GT	3	6	0	8	0	0	0	Mosquito	A	2.290083e-05	1.366303e-06	MF.9	2.006843e-05	1117671	S	C	L	HC	0.1323	0.1899	1
4007	64	G	G	288	G	A	GGG	GGA	Syn	G288A	GA	9	4	8	0	1.197679	0.6770542	1.887307	Mosquito	B	6.112924e-06	3.730988e-07	MF.9	2.151363e-05	1126114	S	C	N	HC	0.1323	0.1899	1
4008	64	G	R	286	G	A	GGG	AGG	NonSyn	G286A	GA	9	8	8	0	1.405879	0.5621567	2.835	Human	A	6.69739e-06	4.668841e-07	MF.9	5.422134e-05	1029605	C	C	N	HC	0.1323	0.1899	1
4009	64	G	R	286	G	A	GGG	AGG	NonSyn	G286A	GA	9	3	8	0	2.241848	0.4046209	4.229639	Human	B	7.684204e-06	4.645403e-07	MF.9	2.04522e-05	1061774	C	C	N	HC	0.1323	0.1899	1
4010	64	G	R	286	G	A	GGG	AGG	NonSyn	G286A	GA	9	0	8	0	1.181495	0.3953566	1.753038	Mosquito	B	6.112924e-06	3.730988e-07	MF.9	1.075758e-05	1126112	C	C	N	HC	0.1323	0.1899	1
4011	64	G	R	286	G	C	GGG	CGG	NonSyn	G286C	GC	1	8	1	7	0	0	0	Mosquito	B	3.432927e-06	9.570197e-07	MF.9	0	1133307	C	C	L	HC	0.1323	0.1899	1
4012	64	G	V	287	G	T	GGG	GTG	NonSyn	G287T	GT	9	0	8	0	1.193209	0.5296285	2.16573	Human	A	5.90433e-06	1.997031e-07	MF.9	8.337016e-06	1053332	NC	C	N	HC	0.1323	0.1899	1
4013	64	G	W	286	G	T	GGG	TGG	NonSyn	G286T	GT	9	1	8	0	0.9727776	0.2474936	1.418797	Human	A	5.90433e-06	1.997031e-07	MF.9	0.0001042718	1053331	NC	C	N	HC	0.1323	0.1899	1
4014	65	I	I	291	A	C	ATA	ATC	Syn	A291C	AC	9	9	8	0	1.3082	0.883648	3.502308	Human	A	2.326514e-06	2.040447e-07	MF.9	0.0003052197	1036805	S	C	N	HC	0.1969	0.1864	1
4015	65	I	I	291	A	T	ATA	ATT	Syn	A291T	AT	9	3	8	0	1.201267	0.6932322	1.960098	Human	A	2.37871e-06	1.833534e-07	MF.9	4.016048e-06	1053335	S	C	N	HC	0.1969	0.1864	1
4016	65	I	I	291	A	C	ATA	ATC	Syn	A291C	AC	9	9	8	0	1.058321	0.7173282	1.781603	Human	B	2.288044e-06	1.737362e-07	MF.9	0.0001049173	1068974	S	C	N	HC	0.1969	0.1864	1
4017	65	I	I	291	A	T	ATA	ATT	Syn	A291T	AT	9	7	8	0	1.140889	0.608818	3.022898	Human	B	2.589251e-06	1.43343e-07	MF.9	0.0001192242	1085504	S	C	N	HC	0.1969	0.1864	1
4018	65	I	I	291	A	C	ATA	ATC	Syn	A291C	AC	9	9	8	0	0.5590913	0.5092012	0.6551513	Mosquito	A	3.286083e-06	1.701643e-07	MF.9	0.0004238702	1101143	S	C	D	HC	0.1969	0.1864	1
4019	65	I	I	291	A	C	ATA	ATC	Syn	A291C	AC	9	9	8	0	0.9635325	0.8001043	1.126961	Mosquito	B	2.391816e-06	1.394774e-07	MF.9	0.02743746	1133312	S	C	N	HC	0.1969	0.1864	1
4020	65	I	I	291	A	T	ATA	ATT	Syn	A291T	AT	9	5	8	0	1.088468	0.5021645	1.74936	Mosquito	B	2.369747e-06	1.784832e-07	MF.9	4.104332e-05	1149842	S	C	N	HC	0.1969	0.1864	1
4021	65	I	K	290	T	A	ATA	AAA	NonSyn	T290A	TA	9	5	8	0	5.291216	0.6472685	10.20051	Human	A	3.680327e-06	2.30523e-07	MF.9	3.736192e-05	1029608	NC	C	N	HC	0.1969	0.1864	1
4022	65	I	K	290	T	A	ATA	AAA	NonSyn	T290A	TA	9	7	8	0	0.7382585	0.2537951	4.018626	Human	B	4.145682e-06	2.689648e-07	MF.9	0.0002762403	1061777	NC	C	N	HC	0.1969	0.1864	1
4023	65	I	L	289	A	C	ATA	CTA	NonSyn	A289C	AC	0	9	0	8	0	0	0	Human	B	2.288044e-06	1.737362e-07	MF.9	0	1068972	C	C	L	HC	0.1969	0.1864	1
4024	65	I	M	291	A	G	ATA	ATG	NonSyn	A291G	AG	9	9	8	0	1.094402	0.6804719	1.572918	Human	A	1.14325e-05	8.091075e-07	MF.9	0.0001204814	1045323	C	C	N	HC	0.1969	0.1864	1
4025	65	I	M	291	A	G	ATA	ATG	NonSyn	A291G	AG	9	4	8	0	1.962714	0.3017263	3.998021	Mosquito	A	1.210803e-05	6.184859e-07	MF.9	0.0002615369	1109661	C	C	N	HC	0.1969	0.1864	1
4026	65	I	M	291	A	G	ATA	ATG	NonSyn	A291G	AG	9	7	8	0	1.03498	0.5910105	1.264951	Mosquito	B	1.180995e-05	6.889282e-07	MF.9	9.918803e-05	1141830	C	C	N	HC	0.1969	0.1864	1
4027	65	I	R	290	T	G	ATA	AGA	NonSyn	T290G	TG	0	9	0	8	0	0	0	Mosquito	A	3.486291e-06	1.611304e-07	MF.9	0	1109660	NC	C	L	HC	0.1969	0.1864	1
4028	65	I	T	290	T	C	ATA	ACA	NonSyn	T290C	TC	9	0	8	0	0.8112838	0.301817	1.567451	Human	A	8.304354e-06	4.831455e-07	MF.9	8.302648e-06	1036804	NC	C	N	HC	0.1969	0.1864	1
4029	65	I	T	290	T	C	ATA	ACA	NonSyn	T290C	TC	8	3	8	0	0.9121191	0.1081672	1.797932	Mosquito	A	1.724887e-05	1.124953e-06	MF.9	0.0001452897	1101142	NC	C	N	HC	0.1969	0.1864	1
4030	65	I	T	290	T	C	ATA	ACA	NonSyn	T290C	TC	9	2	8	0	0.8125495	0.6740151	0.9736956	Mosquito	B	8.756502e-06	5.645669e-07	MF.9	2.11961e-05	1133311	NC	C	D	HC	0.1969	0.1864	1
4031	65	I	V	289	A	G	ATA	GTA	NonSyn	A289G	AG	9	6	8	0	1.29328	0.7559517	1.833876	Human	A	1.14325e-05	8.091075e-07	MF.9	0.0001325324	1045321	C	C	N	HC	0.1969	0.1864	1
4032	65	I	V	289	A	G	ATA	GTA	NonSyn	A289G	AG	9	6	8	0	1.08432	0.6534281	1.678859	Human	B	1.213945e-05	3.148199e-07	MF.9	0.0003575526	1077490	C	C	N	HC	0.1969	0.1864	1
4033	65	I	V	289	A	G	ATA	GTA	NonSyn	A289G	AG	8	4	8	0	0.9214437	0.5926914	1.736645	Mosquito	A	1.210803e-05	6.184859e-07	MF.9	0.0001462188	1109659	C	C	N	HC	0.1969	0.1864	1
4034	65	I	V	289	A	G	ATA	GTA	NonSyn	A289G	AG	9	9	8	0	0.9580084	0.8862871	1.333824	Mosquito	B	1.180995e-05	6.889282e-07	MF.9	0.0001284154	1141828	C	C	N	HC	0.1969	0.1864	1
4035	66	L	L	292	T	C	TTG	CTG	Syn	T292C	TC	9	9	8	0	0.909459	0.7865281	1.056002	Human	A	8.304354e-06	4.831455e-07	MF.9	0.0001620797	1036806	S	C	N	HC	0.1942	0.1897	1
4036	66	L	L	292	T	C	TTG	CTG	Syn	T292C	TC	9	7	8	0	0.8449126	0.5747854	1.121551	Human	B	8.638697e-06	3.744363e-07	MF.9	0.0001879474	1068975	S	C	N	HC	0.1942	0.1897	1
4037	66	L	L	294	G	A	TTG	TTA	Syn	G294A	GA	9	1	8	0	1.580622	0.1881318	2.976184	Mosquito	A	8.774931e-06	2.38219e-07	MF.9	5.112344e-05	1093949	S	C	N	HC	0.1942	0.1897	1
4038	66	L	L	292	T	C	TTG	CTG	Syn	T292C	TC	9	8	8	0	0.8716835	0.6619188	1.045792	Mosquito	B	8.756502e-06	5.645669e-07	MF.9	0.0001071194	1133313	S	C	N	HC	0.1942	0.1897	1
4039	66	L	S	293	T	C	TTG	TCG	NonSyn	T293C	TC	9	3	8	0	1.052897	0.6718837	1.587136	Mosquito	B	8.756502e-06	5.645669e-07	MF.9	2.27643e-05	1133314	NC	C	N	HC	0.1942	0.1897	1
4040	66	L	V	292	T	G	TTG	GTG	NonSyn	T292G	TG	9	7	8	0	0.9187772	0.6187316	1.218823	Human	A	1.799189e-06	1.556942e-07	MF.9	5.929744e-05	1045324	C	C	N	HC	0.1942	0.1897	1
4041	66	L	V	292	T	G	TTG	GTG	NonSyn	T292G	TG	9	8	8	0	1.100359	0.8340741	1.409212	Human	B	1.80746e-06	1.143024e-07	MF.9	4.698684e-05	1077493	C	C	N	HC	0.1942	0.1897	1
4042	66	L	V	292	T	G	TTG	GTG	NonSyn	T292G	TG	9	6	8	0	1.182303	0.883186	1.537375	Mosquito	B	2.030327e-06	1.119074e-07	MF.9	6.025468e-05	1141831	C	C	N	HC	0.1942	0.1897	1
4043	66	L	W	293	T	G	TTG	TGG	NonSyn	T293G	TG	9	2	8	0	1.230642	0.7623593	1.697274	Human	A	1.799189e-06	1.556942e-07	MF.9	1.142835e-05	1045325	C	C	N	HC	0.1942	0.1897	1
4044	66	L	W	293	T	G	TTG	TGG	NonSyn	T293G	TG	9	5	8	0	1.494411	0.6233498	2.100879	Human	B	1.80746e-06	1.143024e-07	MF.9	6.153783e-05	1077494	C	C	N	HC	0.1942	0.1897	1
4045	66	L	X	293	T	A	TTG	TAG	NonSyn	T293A	TA	0	9	0	8	0	0	0	Human	B	4.145682e-06	2.689648e-07	MF.9	0	1061779	X	C	L	HC	0.1942	0.1897	1
4046	66	L	X	293	T	A	TTG	TAG	NonSyn	T293A	TA	0	9	0	8	0	0	0	Mosquito	A	7.166782e-06	3.393327e-07	MF.9	0	1093948	X	C	L	HC	0.1942	0.1897	1
4047	66	L	X	293	T	A	TTG	TAG	NonSyn	T293A	TA	1	8	1	7	0	0	0	Mosquito	B	4.312763e-06	3.05777e-07	MF.9	0	1126117	X	C	L	HC	0.1942	0.1897	1
4048	67	K	E	295	A	G	AAG	GAG	NonSyn	A295G	AG	6	3	0	8	0	0	0	Human	B	1.213945e-05	3.148199e-07	MF.9	9.763813e-06	1077495	C	C	L	HC	0.2680	0.1984	0
4049	67	K	K	297	G	A	AAG	AAA	Syn	G297A	GA	9	5	8	0	0.7436337	0.6780312	1.647631	Human	A	6.69739e-06	4.668841e-07	MF.9	0.0003856566	1029612	S	C	N	HC	0.2680	0.1984	0
4050	67	K	K	297	G	A	AAG	AAA	Syn	G297A	GA	9	6	8	0	0.8949861	0.567282	1.617698	Human	B	7.684204e-06	4.645403e-07	MF.9	1.954051e-05	1061781	S	C	N	HC	0.2680	0.1984	0
4051	67	K	K	297	G	A	AAG	AAA	Syn	G297A	GA	9	5	8	0	1.515687	1.156146	2.022938	Mosquito	A	8.774931e-06	2.38219e-07	MF.9	0.0003498353	1093950	S	C	B	HC	0.2680	0.1984	0
4052	67	K	K	297	G	A	AAG	AAA	Syn	G297A	GA	9	7	8	0	1.268589	0.9856198	1.60835	Mosquito	B	6.112924e-06	3.730988e-07	MF.9	0.0001423024	1126119	S	C	N	HC	0.2680	0.1984	0
4053	67	K	M	296	A	T	AAG	ATG	NonSyn	A296T	AT	1	8	1	7	0	0	2.854921	Mosquito	A	2.875636e-06	1.187371e-07	MF.9	0	1117676	C	C	N	HC	0.2680	0.1984	0
4054	67	K	N	297	G	C	AAG	AAC	NonSyn	G297C	GC	8	5	8	0	3.548889	0.4572104	6.642128	Human	A	3.700457e-06	2.674076e-07	MF.9	4.200221e-05	1036811	C	C	N	HC	0.2680	0.1984	0
4055	67	K	N	297	G	T	AAG	AAT	NonSyn	G297T	GT	8	6	8	0	1.125778	0.3333632	2.384513	Human	B	7.052585e-06	4.58263e-07	MF.9	6.350664e-05	1085508	C	C	N	HC	0.2680	0.1984	0
4056	67	K	N	297	G	T	AAG	AAT	NonSyn	G297T	GT	9	8	8	0	0.7589593	0.4493181	0.9469621	Mosquito	A	2.290083e-05	1.366303e-06	MF.9	0.0001301713	1117677	C	C	D	HC	0.2680	0.1984	0
4057	67	K	N	297	G	T	AAG	AAT	NonSyn	G297T	GT	9	7	8	0	1.068123	0.5318162	1.60344	Mosquito	B	7.493022e-06	1.393832e-06	MF.9	1.897365e-05	1149846	C	C	N	HC	0.2680	0.1984	0
4058	67	K	Q	295	A	C	AAG	CAG	NonSyn	A295C	AC	9	0	8	0	1.667928	0.9615122	2.262721	Human	A	2.326514e-06	2.040447e-07	MF.9	1.183353e-05	1036809	C	C	N	HC	0.2680	0.1984	0
4059	67	K	Q	295	A	C	AAG	CAG	NonSyn	A295C	AC	9	0	8	0	1.22628	0.2388557	1.986422	Mosquito	B	2.391816e-06	1.394774e-07	MF.9	3.290892e-06	1133316	C	C	N	HC	0.2680	0.1984	0
4060	67	K	X	295	A	T	AAG	TAG	NonSyn	A295T	AT	1	8	1	7	0.8695406	0	1.739081	Human	A	2.37871e-06	1.833534e-07	MF.9	0	1053337	X	C	N	HC	0.2680	0.1984	0
4061	67	K	X	295	A	T	AAG	TAG	NonSyn	A295T	AT	1	8	1	7	0	0	2.989682	Mosquito	A	2.875636e-06	1.187371e-07	MF.9	0	1117675	X	C	N	HC	0.2680	0.1984	0
4062	68	R	G	298	A	G	AGA	GGA	NonSyn	A298G	AG	9	6	8	0	1.722079	0.4130955	3.031063	Human	B	1.213945e-05	3.148199e-07	MF.9	5.481637e-05	1077497	C	C	N	HC	0.2609	0.1976	0
4063	68	R	G	298	A	G	AGA	GGA	NonSyn	A298G	AG	8	1	8	0	0.9425096	0.6449816	1.125757	Mosquito	A	1.210803e-05	6.184859e-07	MF.9	4.091218e-05	1109666	C	C	N	HC	0.2609	0.1976	0
4064	68	R	I	299	G	T	AGA	ATA	NonSyn	G299T	GT	9	5	8	0	0.9533568	0.5359971	1.370716	Human	A	5.90433e-06	1.997031e-07	MF.9	4.150176e-05	1053341	NC	C	N	HC	0.2609	0.1976	0
4065	68	R	I	299	G	T	AGA	ATA	NonSyn	G299T	GT	9	4	8	0	1.210479	0.6518148	1.769143	Human	B	7.052585e-06	4.58263e-07	MF.9	5.371802e-05	1085510	NC	C	N	HC	0.2609	0.1976	0
4066	68	R	K	299	G	A	AGA	AAA	NonSyn	G299A	GA	9	7	8	0	0.7407379	0.4473227	1.007146	Human	A	6.69739e-06	4.668841e-07	MF.9	6.413908e-05	1029613	C	C	N	HC	0.2609	0.1976	0
4067	68	R	K	299	G	A	AGA	AAA	NonSyn	G299A	GA	9	4	8	0	1.311502	0.8606271	1.638547	Mosquito	B	6.112924e-06	3.730988e-07	MF.9	7.207546e-05	1126120	C	C	N	HC	0.2609	0.1976	0
4068	68	R	R	300	A	G	AGA	AGG	Syn	A300G	AG	9	4	8	0	1.198666	0.2898845	2.107448	Human	A	1.14325e-05	8.091075e-07	MF.9	7.232144e-05	1045329	S	C	N	HC	0.2609	0.1976	0
4069	68	R	R	300	A	G	AGA	AGG	Syn	A300G	AG	9	5	8	0	0.8213038	0.5558319	1.181787	Mosquito	A	1.210803e-05	6.184859e-07	MF.9	0.000103985	1109667	S	C	N	HC	0.2609	0.1976	0
4070	68	R	R	298	A	C	AGA	CGA	Syn	A298C	AC	9	0	8	0	1.107375	0.2278428	1.650865	Mosquito	B	2.391816e-06	1.394774e-07	MF.9	9.689766e-06	1133319	S	C	N	HC	0.2609	0.1976	0
4071	68	R	R	300	A	G	AGA	AGG	Syn	A300G	AG	9	6	8	0	0.9101347	0.5999569	1.668465	Mosquito	B	1.180995e-05	6.889282e-07	MF.9	4.430296e-05	1141836	S	C	N	HC	0.2609	0.1976	0
4072	68	R	S	300	A	C	AGA	AGC	NonSyn	A300C	AC	1	8	1	7	0	0	0	Human	A	2.326514e-06	2.040447e-07	MF.9	0	1036814	NC	C	L	HC	0.2609	0.1976	0
4073	68	R	S	300	A	C	AGA	AGC	NonSyn	A300C	AC	1	8	1	7	0	0	0	Mosquito	A	3.286083e-06	1.701643e-07	MF.9	0	1101152	NC	C	L	HC	0.2609	0.1976	0
4074	68	R	S	300	A	T	AGA	AGT	NonSyn	A300T	AT	0	9	0	8	0	0	0	Mosquito	A	2.875636e-06	1.187371e-07	MF.9	0	1117680	NC	C	L	HC	0.2609	0.1976	0
4075	68	R	S	300	A	T	AGA	AGT	NonSyn	A300T	AT	1	8	1	7	0	0	0.9421445	Mosquito	B	2.369747e-06	1.784832e-07	MF.9	0	1149849	NC	C	D	HC	0.2609	0.1976	0
4076	68	R	T	299	G	C	AGA	ACA	NonSyn	G299C	GC	9	2	8	0	1.105691	0.7490522	1.516767	Human	A	3.700457e-06	2.674076e-07	MF.9	7.545775e-06	1036813	C	C	N	HC	0.2609	0.1976	0
4077	68	R	T	299	G	C	AGA	ACA	NonSyn	G299C	GC	9	7	8	0	0.9695536	0.8321971	1.211255	Human	B	4.230269e-06	2.592937e-07	MF.9	9.766913e-05	1068982	C	C	N	HC	0.2609	0.1976	0
4078	68	R	T	299	G	C	AGA	ACA	NonSyn	G299C	GC	9	2	8	0	0.8861564	0.6402525	1.296546	Mosquito	B	3.432927e-06	9.570197e-07	MF.9	1.880229e-05	1133320	C	C	N	HC	0.2609	0.1976	0
4079	68	R	X	298	A	T	AGA	TGA	NonSyn	A298T	AT	2	7	1	7	0	0	0.7308536	Human	A	2.37871e-06	1.833534e-07	MF.9	0	1053340	X	C	D	HC	0.2609	0.1976	0
4080	68	R	X	298	A	T	AGA	TGA	NonSyn	A298T	AT	0	9	0	8	0	0	0	Mosquito	A	2.875636e-06	1.187371e-07	MF.9	0	1117678	X	C	L	HC	0.2609	0.1976	0
4081	68	R	X	298	A	T	AGA	TGA	NonSyn	A298T	AT	1	8	1	7	0	0	0	Mosquito	B	2.369747e-06	1.784832e-07	MF.9	0	1149847	X	C	L	HC	0.2609	0.1976	0
4082	69	W	G	301	T	G	TGG	GGG	NonSyn	T301G	TG	1	8	1	7	0.8238124	0	2.059531	Mosquito	B	2.030327e-06	1.119074e-07	MF.9	0	1141837	NC	C	N	HC	0.2680	0.1903	0
4083	69	W	R	301	T	A	TGG	AGG	NonSyn	T301A	TA	9	9	8	0	1.70464	0.8446168	2.86559	Human	A	3.680327e-06	2.30523e-07	MF.9	6.718097e-05	1029614	C	C	N	HC	0.2680	0.1903	0
4084	69	W	R	301	T	A	TGG	AGG	NonSyn	T301A	TA	9	9	8	0	0.9914755	0.5016172	1.445479	Human	B	4.145682e-06	2.689648e-07	MF.9	9.777737e-05	1061783	C	C	N	HC	0.2680	0.1903	0
4085	69	W	R	301	T	C	TGG	CGG	NonSyn	T301C	TC	9	4	8	0	0.8996262	0.5209469	1.142714	Human	B	8.638697e-06	3.744363e-07	MF.9	0.0001286544	1068984	C	C	N	HC	0.2680	0.1903	0
4086	69	W	R	301	T	C	TGG	CGG	NonSyn	T301C	TC	9	5	8	0	1.308582	0.3059854	6.406763	Mosquito	A	1.724887e-05	1.124953e-06	MF.9	8.852264e-05	1101153	C	C	N	HC	0.2680	0.1903	0
4087	69	W	R	301	T	A	TGG	AGG	NonSyn	T301A	TA	9	9	8	0	0.9135755	0.7689059	1.246035	Mosquito	B	4.312763e-06	3.05777e-07	MF.9	4.649173e-05	1126121	C	C	N	HC	0.2680	0.1903	0
4088	69	W	R	301	T	C	TGG	CGG	NonSyn	T301C	TC	9	4	8	0	0.8432452	0.6314678	1.085929	Mosquito	B	8.756502e-06	5.645669e-07	MF.9	3.719339e-05	1133322	C	C	N	HC	0.2680	0.1903	0
4089	69	W	S	302	G	C	TGG	TCG	NonSyn	G302C	GC	9	7	8	0	2.582871	0.6782675	4.56971	Human	A	3.700457e-06	2.674076e-07	MF.9	7.400802e-05	1036816	C	C	N	HC	0.2680	0.1903	0
4090	69	W	S	302	G	C	TGG	TCG	NonSyn	G302C	GC	9	9	8	0	0.8869324	0.4327546	1.561801	Human	B	4.230269e-06	2.592937e-07	MF.9	0.0001394643	1068985	C	C	N	HC	0.2680	0.1903	0
4091	69	W	S	302	G	C	TGG	TCG	NonSyn	G302C	GC	9	9	8	0	1.293384	0.5629326	2.023836	Mosquito	B	3.432927e-06	9.570197e-07	MF.9	7.558533e-05	1133323	C	C	N	HC	0.2680	0.1903	0
4092	69	W	X	302	G	A	TGG	TAG	NonSyn	G302A	GA	9	2	8	0	1.364856	0.1255253	2.660174	Human	A	6.69739e-06	4.668841e-07	MF.9	1.11012e-05	1029615	X	C	N	HC	0.2680	0.1903	0
4093	69	W	X	303	G	A	TGG	TGA	NonSyn	G303A	GA	8	1	8	0	0.9398702	0.4006633	1.479077	Human	A	6.69739e-06	4.668841e-07	MF.9	7.596793e-06	1029616	X	C	N	HC	0.2680	0.1903	0
4094	69	W	X	302	G	A	TGG	TAG	NonSyn	G302A	GA	3	6	1	7	0.05784803	0	0.1446201	Mosquito	A	8.774931e-06	2.38219e-07	MF.9	0	1093953	X	C	D	HC	0.2680	0.1903	0
4095	69	W	X	303	G	A	TGG	TGA	NonSyn	G303A	GA	2	7	0	8	0	0	0	Mosquito	A	8.774931e-06	2.38219e-07	MF.9	8.049197e-06	1093954	X	C	L	HC	0.2680	0.1903	0
4096	69	W	X	302	G	A	TGG	TAG	NonSyn	G302A	GA	9	2	8	0	1.14817	0.4306747	1.890041	Mosquito	B	6.112924e-06	3.730988e-07	MF.9	9.07024e-06	1126122	X	C	N	HC	0.2680	0.1903	0
4097	70	G	E	305	G	A	GGA	GAA	NonSyn	G305A	GA	9	1	8	0	1.049262	0.5086477	1.861791	Human	B	7.684204e-06	4.645403e-07	MF.9	2.590083e-05	1061787	C	C	N	HC	0.2951	0.1835	0
4098	70	G	G	306	A	G	GGA	GGG	Syn	A306G	AG	9	9	8	0	1.408406	0.6992365	1.958859	Human	A	1.14325e-05	8.091075e-07	MF.9	6.27911e-05	1045331	S	C	N	HC	0.2951	0.1835	0
4099	70	G	G	306	A	G	GGA	GGG	Syn	A306G	AG	9	8	8	0	0.8900823	0.3559468	1.842679	Human	B	1.213945e-05	3.148199e-07	MF.9	0.0001989036	1077500	S	C	N	HC	0.2951	0.1835	0
4100	70	G	G	306	A	G	GGA	GGG	Syn	A306G	AG	8	4	8	0	0.9755132	0.3208824	1.610392	Mosquito	A	1.210803e-05	6.184859e-07	MF.9	6.832209e-05	1109669	S	C	N	HC	0.2951	0.1835	0
4101	70	G	G	306	A	G	GGA	GGG	Syn	A306G	AG	9	9	8	0	1.158377	0.4496863	1.867068	Mosquito	B	1.180995e-05	6.889282e-07	MF.9	8.091658e-05	1141838	S	C	N	HC	0.2951	0.1835	0
4102	70	G	R	304	G	A	GGA	AGA	NonSyn	G304A	GA	9	9	8	0	1.441305	0.6085275	2.401044	Human	A	6.69739e-06	4.668841e-07	MF.9	0.0004533987	1029617	C	C	N	HC	0.2951	0.1835	0
4103	70	G	R	304	G	A	GGA	AGA	NonSyn	G304A	GA	9	9	8	0	1.479715	0.9329597	2.199971	Human	B	7.684204e-06	4.645403e-07	MF.9	0.0009913805	1061786	C	C	N	HC	0.2951	0.1835	0
4104	70	G	R	304	G	C	GGA	CGA	NonSyn	G304C	GC	9	3	8	0	0.8569534	0.5904942	1.207578	Human	B	4.230269e-06	2.592937e-07	MF.9	8.261504e-05	1068987	C	C	N	HC	0.2951	0.1835	0
4105	70	G	R	304	G	A	GGA	AGA	NonSyn	G304A	GA	9	3	8	0	1.099954	0.3932355	3.587042	Mosquito	A	8.774931e-06	2.38219e-07	MF.9	2.440374e-05	1093955	C	C	N	HC	0.2951	0.1835	0
4106	70	G	R	304	G	A	GGA	AGA	NonSyn	G304A	GA	9	9	8	0	1.19626	0.6323874	1.760132	Mosquito	B	6.112924e-06	3.730988e-07	MF.9	6.722915e-05	1126124	C	C	N	HC	0.2951	0.1835	0
4107	70	G	R	304	G	C	GGA	CGA	NonSyn	G304C	GC	9	2	8	0	1.159303	0.4986379	2.11156	Mosquito	B	3.432927e-06	9.570197e-07	MF.9	1.222348e-05	1133325	C	C	N	HC	0.2951	0.1835	0
4108	71	T	A	307	A	G	ACA	GCA	NonSyn	A307G	AG	9	9	8	0	1.290932	0.6996075	2.155839	Human	A	1.14325e-05	8.091075e-07	MF.9	0.0006870029	1045332	C	C	N	HC	0.1881	0.1744	0
4109	71	T	A	307	A	G	ACA	GCA	NonSyn	A307G	AG	9	9	8	0	0.9179395	0.5837792	1.295081	Human	B	1.213945e-05	3.148199e-07	MF.9	0.0002724204	1077501	C	C	N	HC	0.1881	0.1744	0
4110	71	T	A	307	A	G	ACA	GCA	NonSyn	A307G	AG	9	4	8	0	1.035409	0.8376579	1.701449	Mosquito	A	1.210803e-05	6.184859e-07	MF.9	5.801011e-05	1109670	C	C	N	HC	0.1881	0.1744	0
4111	71	T	A	307	A	G	ACA	GCA	NonSyn	A307G	AG	9	5	8	0	0.6669658	0.4402377	1.360765	Mosquito	B	1.180995e-05	6.889282e-07	MF.9	3.550138e-05	1141839	C	C	N	HC	0.1881	0.1744	0
4112	71	T	I	308	C	T	ACA	ATA	NonSyn	C308T	CT	9	9	8	0	0.413056	0.2738846	0.5431666	Human	B	0.0002635581	1.843403e-05	MF.9	0.0006861746	1085518	NC	C	D	HC	0.1881	0.1744	0
4113	71	T	K	308	C	A	ACA	AAA	NonSyn	C308A	CA	9	1	8	0	0.7344833	0.1914883	1.4875	Mosquito	A	6.508077e-06	1.996644e-07	MF.9	6.88563e-05	1093957	C	C	N	HC	0.1881	0.1744	0
4114	71	T	P	307	A	C	ACA	CCA	NonSyn	A307C	AC	1	8	1	7	0.4604822	0	1.151206	Mosquito	A	3.286083e-06	1.701643e-07	MF.9	0	1101159	NC	C	N	HC	0.1881	0.1744	0
4115	71	T	S	307	A	T	ACA	TCA	NonSyn	A307T	AT	9	2	8	0	0.9424545	0.458479	1.912477	Human	B	2.589251e-06	1.43343e-07	MF.9	1.846918e-05	1085517	C	C	N	HC	0.1881	0.1744	0
4116	71	T	T	309	A	C	ACA	ACC	Syn	A309C	AC	9	7	8	0	2.665905	0.5394313	4.994678	Human	A	2.326514e-06	2.040447e-07	MF.9	6.88493e-05	1036822	S	C	N	HC	0.1881	0.1744	0
4117	71	T	T	309	A	G	ACA	ACG	Syn	A309G	AG	9	9	8	0	1.311612	0.5517504	1.79898	Human	A	1.14325e-05	8.091075e-07	MF.9	8.196345e-05	1045334	S	C	N	HC	0.1881	0.1744	0
4118	71	T	T	309	A	G	ACA	ACG	Syn	A309G	AG	9	9	8	0	1.147591	0.4912341	1.528765	Human	B	1.213945e-05	3.148199e-07	MF.9	0.000218287	1077503	S	C	N	HC	0.1881	0.1744	0
4119	71	T	T	309	A	T	ACA	ACT	Syn	A309T	AT	9	4	8	0	1.569509	0.5741316	2.387349	Human	B	2.589251e-06	1.43343e-07	MF.9	3.638117e-05	1085519	S	C	N	HC	0.1881	0.1744	0
4120	71	T	T	309	A	G	ACA	ACG	Syn	A309G	AG	9	8	8	0	1.040451	0.7422882	1.338613	Mosquito	A	1.210803e-05	6.184859e-07	MF.9	0.0001056971	1109672	S	C	N	HC	0.1881	0.1744	0
4121	71	T	T	309	A	T	ACA	ACT	Syn	A309T	AT	8	2	8	0	1.2442	0.4794795	1.692334	Mosquito	A	2.875636e-06	1.187371e-07	MF.9	1.409294e-05	1117688	S	C	N	HC	0.1881	0.1744	0
4122	71	T	T	309	A	C	ACA	ACC	Syn	A309C	AC	9	9	8	0	1.223337	0.6289793	1.563248	Mosquito	B	2.391816e-06	1.394774e-07	MF.9	8.495851e-05	1133329	S	C	N	HC	0.1881	0.1744	0
4123	71	T	T	309	A	G	ACA	ACG	Syn	A309G	AG	9	9	8	0	1.281084	1.015447	1.604575	Mosquito	B	1.180995e-05	6.889282e-07	MF.9	0.0005618224	1141841	S	C	B	HC	0.1881	0.1744	0
4124	71	T	T	309	A	T	ACA	ACT	Syn	A309T	AT	9	1	8	0	2.198125	0.395674	4.493391	Mosquito	B	2.369747e-06	1.784832e-07	MF.9	1.096239e-05	1149857	S	C	N	HC	0.1881	0.1744	0
4125	72	I	I	312	T	A	ATT	ATA	Syn	T312A	TA	9	1	8	0	1.127335	0.5841855	1.378916	Human	A	3.680327e-06	2.30523e-07	MF.9	1.191217e-05	1029621	S	C	N	HC	0.1643	0.1684	0
4126	72	I	I	312	T	C	ATT	ATC	Syn	T312C	TC	9	9	8	0	0.6787542	0.5295796	0.8249401	Human	A	8.304354e-06	4.831455e-07	MF.9	0.0004943551	1036825	S	C	D	HC	0.1643	0.1684	0
4127	72	I	I	312	T	A	ATT	ATA	Syn	T312A	TA	9	3	8	0	1.3533	0.8324321	2.018419	Human	B	4.145682e-06	2.689648e-07	MF.9	7.392759e-05	1061790	S	C	N	HC	0.1643	0.1684	0
4128	72	I	I	312	T	C	ATT	ATC	Syn	T312C	TC	9	9	8	0	1.164081	0.986878	1.330866	Human	B	8.638697e-06	3.744363e-07	MF.9	0.0002079213	1068994	S	C	N	HC	0.1643	0.1684	0
4129	72	I	I	312	T	A	ATT	ATA	Syn	T312A	TA	9	1	8	0	0.9815636	0.7079081	1.335875	Mosquito	A	7.166782e-06	3.393327e-07	MF.9	9.977053e-05	1093959	S	C	N	HC	0.1643	0.1684	0
4130	72	I	I	312	T	C	ATT	ATC	Syn	T312C	TC	9	9	8	0	0.9362615	0.6496857	1.311127	Mosquito	A	1.724887e-05	1.124953e-06	MF.9	0.0001529815	1101163	S	C	N	HC	0.1643	0.1684	0
4131	72	I	I	312	T	A	ATT	ATA	Syn	T312A	TA	9	4	8	0	1.148036	0.6653938	1.809744	Mosquito	B	4.312763e-06	3.05777e-07	MF.9	7.587464e-06	1126128	S	C	N	HC	0.1643	0.1684	0
4132	72	I	I	312	T	C	ATT	ATC	Syn	T312C	TC	9	9	8	0	1.263648	1.043585	1.494481	Mosquito	B	8.756502e-06	5.645669e-07	MF.9	0.0001542784	1133332	S	C	B	HC	0.1643	0.1684	0
4133	72	I	L	310	A	C	ATT	CTT	NonSyn	A310C	AC	9	4	8	0	3.038378	1.961981	5.059178	Human	A	2.326514e-06	2.040447e-07	MF.9	0.0001241323	1036823	C	C	B	HC	0.1643	0.1684	0
4134	72	I	T	311	T	C	ATT	ACT	NonSyn	T311C	TC	9	4	8	0	1.181004	0.7867797	1.752499	Human	A	8.304354e-06	4.831455e-07	MF.9	2.798917e-05	1036824	NC	C	N	HC	0.1643	0.1684	0
4135	72	I	T	311	T	C	ATT	ACT	NonSyn	T311C	TC	9	3	8	0	1.209059	0.05477074	2.195768	Human	B	8.638697e-06	3.744363e-07	MF.9	1.472104e-05	1068993	NC	C	N	HC	0.1643	0.1684	0
4136	72	I	T	311	T	C	ATT	ACT	NonSyn	T311C	TC	9	4	8	0	1.444726	0.1377037	2.35463	Mosquito	A	1.724887e-05	1.124953e-06	MF.9	0.0001012724	1101162	NC	C	N	HC	0.1643	0.1684	0
4137	72	I	T	311	T	C	ATT	ACT	NonSyn	T311C	TC	9	8	8	0	1.218418	0.8990842	1.545985	Mosquito	B	8.756502e-06	5.645669e-07	MF.9	0.0002044116	1133331	NC	C	N	HC	0.1643	0.1684	0
4138	72	I	V	310	A	G	ATT	GTT	NonSyn	A310G	AG	9	5	8	0	0.8865616	0.5240758	1.12553	Human	A	1.14325e-05	8.091075e-07	MF.9	5.410894e-05	1045335	C	C	N	HC	0.1643	0.1684	0
4139	72	I	V	310	A	G	ATT	GTT	NonSyn	A310G	AG	9	4	8	0	1.92492	0.3317454	3.306697	Human	B	1.213945e-05	3.148199e-07	MF.9	2.246838e-05	1077504	C	C	N	HC	0.1643	0.1684	0
4140	72	I	V	310	A	G	ATT	GTT	NonSyn	A310G	AG	9	2	8	0	1.475708	0.1062924	1.747407	Mosquito	A	1.210803e-05	6.184859e-07	MF.9	4.774539e-05	1109673	C	C	N	HC	0.1643	0.1684	0
4141	72	I	V	310	A	G	ATT	GTT	NonSyn	A310G	AG	9	8	8	0	1.074102	0.5972954	1.478472	Mosquito	B	1.180995e-05	6.889282e-07	MF.9	7.735768e-05	1141842	C	C	N	HC	0.1643	0.1684	0
4142	73	K	E	313	A	G	AAA	GAA	NonSyn	A313G	AG	9	5	8	0	0.8309306	0.5242761	1.26113	Human	A	1.14325e-05	8.091075e-07	MF.9	5.472634e-05	1045338	C	C	N	HC	0.1583	0.1742	0
4143	73	K	E	313	A	G	AAA	GAA	NonSyn	A313G	AG	9	7	8	0	0.9398153	0.3274755	1.460175	Human	B	1.213945e-05	3.148199e-07	MF.9	5.092103e-05	1077507	C	C	N	HC	0.1583	0.1742	0
4144	73	K	E	313	A	G	AAA	GAA	NonSyn	A313G	AG	9	4	8	0	1.036281	0.6065123	1.365786	Mosquito	A	1.210803e-05	6.184859e-07	MF.9	4.861153e-05	1109676	C	C	N	HC	0.1583	0.1742	0
4145	73	K	E	313	A	G	AAA	GAA	NonSyn	A313G	AG	9	9	8	0	0.8756439	0.633524	1.100679	Mosquito	B	1.180995e-05	6.889282e-07	MF.9	4.394145e-05	1141845	C	C	N	HC	0.1583	0.1742	0
4146	73	K	I	314	A	T	AAA	ATA	NonSyn	A314T	AT	9	6	8	0	1.775131	0.5424409	3.24124	Human	A	2.37871e-06	1.833534e-07	MF.9	8.516437e-06	1053353	NC	C	N	HC	0.1583	0.1742	0
4147	73	K	I	314	A	T	AAA	ATA	NonSyn	A314T	AT	9	7	8	0	0.891504	0.6242889	1.156759	Human	B	2.589251e-06	1.43343e-07	MF.9	0.0001213557	1085522	NC	C	N	HC	0.1583	0.1742	0
4148	73	K	I	314	A	T	AAA	ATA	NonSyn	A314T	AT	9	5	8	0	1.327491	0.4639129	2.030601	Mosquito	B	2.369747e-06	1.784832e-07	MF.9	2.866342e-05	1149860	NC	C	N	HC	0.1583	0.1742	0
4149	73	K	K	315	A	G	AAA	AAG	Syn	A315G	AG	9	6	8	0	0.9241477	0.5152408	1.094514	Human	A	1.14325e-05	8.091075e-07	MF.9	3.638735e-05	1045340	S	C	N	HC	0.1583	0.1742	0
4150	73	K	K	315	A	G	AAA	AAG	Syn	A315G	AG	9	6	8	0	1.150816	0.4746756	1.83209	Human	B	1.213945e-05	3.148199e-07	MF.9	4.155343e-05	1077509	S	C	N	HC	0.1583	0.1742	0
4151	73	K	K	315	A	G	AAA	AAG	Syn	A315G	AG	9	8	8	0	0.8376694	0.7419017	0.912879	Mosquito	B	1.180995e-05	6.889282e-07	MF.9	2.586428e-05	1141847	S	C	D	HC	0.1583	0.1742	0
4152	73	K	N	315	A	T	AAA	AAT	NonSyn	A315T	AT	9	6	8	0	3.206237	0.6831419	5.879598	Human	A	2.37871e-06	1.833534e-07	MF.9	8.676984e-05	1053354	C	C	N	HC	0.1583	0.1742	0
4153	73	K	N	315	A	T	AAA	AAT	NonSyn	A315T	AT	9	6	8	0	1.103393	0.8214823	1.615671	Human	B	2.589251e-06	1.43343e-07	MF.9	0.0001828351	1085523	C	C	N	HC	0.1583	0.1742	0
4154	73	K	N	315	A	T	AAA	AAT	NonSyn	A315T	AT	9	9	8	0	1.263121	0.903771	1.625025	Mosquito	B	2.369747e-06	1.784832e-07	MF.9	5.172856e-05	1149861	C	C	N	HC	0.1583	0.1742	0
4155	73	K	Q	313	A	C	AAA	CAA	NonSyn	A313C	AC	2	7	1	7	0.6002713	0	1.200543	Human	A	2.326514e-06	2.040447e-07	MF.9	0	1036826	C	C	N	HC	0.1583	0.1742	0
4156	73	K	R	314	A	G	AAA	AGA	NonSyn	A314G	AG	9	2	8	0	0.9336684	0.1465065	1.793378	Human	A	1.14325e-05	8.091075e-07	MF.9	1.987169e-05	1045339	C	C	N	HC	0.1583	0.1742	0
4157	73	K	R	314	A	G	AAA	AGA	NonSyn	A314G	AG	9	7	8	0	0.9522989	0.5928355	1.293966	Human	B	1.213945e-05	3.148199e-07	MF.9	6.277017e-05	1077508	C	C	N	HC	0.1583	0.1742	0
4158	73	K	T	314	A	C	AAA	ACA	NonSyn	A314C	AC	1	8	1	7	0	0	0	Human	B	2.288044e-06	1.737362e-07	MF.9	8.369356e-06	1068996	C	C	L	HC	0.1583	0.1742	0
4159	74	K	I	317	A	T	AAA	ATA	NonSyn	A317T	AT	1	8	1	7	0	0	1.291155	Mosquito	A	2.875636e-06	1.187371e-07	MF.9	0	1117694	NC	C	N	HC	0.1070	0.1752	0
4160	74	K	K	318	A	G	AAA	AAG	Syn	A318G	AG	9	8	8	0	1.082541	0.7641652	3.918796	Human	B	1.213945e-05	3.148199e-07	MF.9	6.999255e-05	1077512	S	C	N	HC	0.1070	0.1752	0
4161	74	K	K	318	A	G	AAA	AAG	Syn	A318G	AG	9	0	8	0	1.174354	0.1284559	1.91932	Mosquito	A	1.210803e-05	6.184859e-07	MF.9	3.156931e-05	1109681	S	C	N	HC	0.1070	0.1752	0
4162	74	K	K	318	A	G	AAA	AAG	Syn	A318G	AG	9	6	8	0	0.7108728	0.3455974	1.016667	Mosquito	B	1.180995e-05	6.889282e-07	MF.9	4.015258e-05	1141850	S	C	N	HC	0.1070	0.1752	0
4163	74	K	Q	316	A	C	AAA	CAA	NonSyn	A316C	AC	9	0	8	0	0.7793442	0.2812962	1.034946	Human	B	2.288044e-06	1.737362e-07	MF.9	8.337467e-06	1068998	C	C	N	HC	0.1070	0.1752	0
4164	74	K	Q	316	A	C	AAA	CAA	NonSyn	A316C	AC	2	7	1	7	0	0	0	Mosquito	A	3.286083e-06	1.701643e-07	MF.9	0	1101167	C	C	L	HC	0.1070	0.1752	0
4165	74	K	Q	316	A	C	AAA	CAA	NonSyn	A316C	AC	4	5	1	7	0	0	0	Mosquito	B	2.391816e-06	1.394774e-07	MF.9	2.339674e-06	1133336	C	C	L	HC	0.1070	0.1752	0
4166	74	K	R	317	A	G	AAA	AGA	NonSyn	A317G	AG	9	8	8	0	0.880825	0.8474063	1.183453	Human	A	1.14325e-05	8.091075e-07	MF.9	5.521948e-05	1045342	C	C	N	HC	0.1070	0.1752	0
4167	74	K	R	317	A	G	AAA	AGA	NonSyn	A317G	AG	9	8	8	0	0.9346332	0.5377709	1.433696	Human	B	1.213945e-05	3.148199e-07	MF.9	1.652975e-05	1077511	C	C	N	HC	0.1070	0.1752	0
4168	74	K	T	317	A	C	AAA	ACA	NonSyn	A317C	AC	9	7	8	0	2.458806	0.3419986	4.446054	Human	A	2.326514e-06	2.040447e-07	MF.9	2.208779e-05	1036830	C	C	N	HC	0.1070	0.1752	0
4169	74	K	T	317	A	C	AAA	ACA	NonSyn	A317C	AC	9	8	8	0	0.7327368	0.3654174	1.01339	Human	B	2.288044e-06	1.737362e-07	MF.9	7.438385e-05	1068999	C	C	N	HC	0.1070	0.1752	0
4170	74	K	T	317	A	C	AAA	ACA	NonSyn	A317C	AC	9	2	8	0	1.044954	0.2670607	2.697062	Mosquito	B	2.391816e-06	1.394774e-07	MF.9	3.963304e-05	1133337	C	C	N	HC	0.1070	0.1752	0
4171	74	K	X	316	A	T	AAA	TAA	NonSyn	A316T	AT	9	4	8	0	2.181662	0.5937333	3.840226	Human	A	2.37871e-06	1.833534e-07	MF.9	1.949616e-05	1053355	X	C	N	HC	0.1070	0.1752	0
4172	74	K	X	316	A	T	AAA	TAA	NonSyn	A316T	AT	9	6	8	0	1.068391	0.5360786	1.966433	Human	B	2.589251e-06	1.43343e-07	MF.9	0.0001584119	1085524	X	C	N	HC	0.1070	0.1752	0
4173	74	K	X	316	A	T	AAA	TAA	NonSyn	A316T	AT	9	1	8	0	1.019702	0.6555526	1.319096	Mosquito	B	2.369747e-06	1.784832e-07	MF.9	1.403804e-05	1149862	X	C	N	HC	0.1070	0.1752	0
4174	75	S	A	319	T	G	TCA	GCA	NonSyn	T319G	TG	1	8	1	7	0.6313541	0	1.578385	Human	A	1.799189e-06	1.556942e-07	MF.9	0	1045344	C	C	N	HC	0.1115	0.1721	0
4175	75	S	A	319	T	G	TCA	GCA	NonSyn	T319G	TG	1	8	1	7	0.2137577	0	0.5343943	Human	B	1.80746e-06	1.143024e-07	MF.9	0	1077513	C	C	D	HC	0.1115	0.1721	0
4176	75	S	L	320	C	T	TCA	TTA	NonSyn	C320T	CT	9	9	8	0	0.7620749	0.4059135	1.27315	Human	A	0.0002554735	2.089311e-05	MF.9	0.0002743809	1053358	NC	C	N	HC	0.1115	0.1721	0
4177	75	S	L	320	C	T	TCA	TTA	NonSyn	C320T	CT	9	9	8	0	0.4263174	0.2487386	0.6559236	Human	B	0.0002635581	1.843403e-05	MF.9	0.0005655357	1085527	NC	C	D	HC	0.1115	0.1721	0
4178	75	S	L	320	C	T	TCA	TTA	NonSyn	C320T	CT	9	9	8	0	0.3415808	0.2247001	0.5118324	Mosquito	A	0.0001578562	6.997471e-06	MF.9	0.0002436647	1117696	NC	C	D	HC	0.1115	0.1721	0
4179	75	S	L	320	C	T	TCA	TTA	NonSyn	C320T	CT	9	9	8	0	0.4645889	0.4044696	0.526332	Mosquito	B	0.0002034795	7.793136e-06	MF.9	0.0003658906	1149865	NC	C	D	HC	0.1115	0.1721	0
4180	75	S	P	319	T	C	TCA	CCA	NonSyn	T319C	TC	9	2	8	0	1.087265	0.1716299	1.850644	Human	B	8.638697e-06	3.744363e-07	MF.9	2.260091e-05	1069001	C	C	N	HC	0.1115	0.1721	0
4181	75	S	P	319	T	C	TCA	CCA	NonSyn	T319C	TC	9	7	8	0	1.037779	0.8788647	1.346991	Mosquito	A	1.724887e-05	1.124953e-06	MF.9	4.429139e-05	1101170	C	C	N	HC	0.1115	0.1721	0
4182	75	S	P	319	T	C	TCA	CCA	NonSyn	T319C	TC	9	9	8	0	1.078704	0.7034037	1.243857	Mosquito	B	8.756502e-06	5.645669e-07	MF.9	0.0001170284	1133339	C	C	N	HC	0.1115	0.1721	0
4183	75	S	S	321	A	T	TCA	TCT	Syn	A321T	AT	9	9	8	0	0.9727815	0.3627867	1.319073	Human	A	2.37871e-06	1.833534e-07	MF.9	8.43933e-05	1053359	S	C	N	HC	0.1115	0.1721	0
4184	75	S	S	321	A	T	TCA	TCT	Syn	A321T	AT	9	9	8	0	1.046608	0.4909928	1.377123	Human	B	2.589251e-06	1.43343e-07	MF.9	0.0003480372	1085528	S	C	N	HC	0.1115	0.1721	0
4185	75	S	S	321	A	G	TCA	TCG	Syn	A321G	AG	8	2	8	0	0.5229604	0.3368932	0.7257199	Mosquito	A	1.210803e-05	6.184859e-07	MF.9	4.412305e-05	1109684	S	C	D	HC	0.1115	0.1721	0
4186	75	S	S	321	A	T	TCA	TCT	Syn	A321T	AT	9	0	8	0	0.8572835	0.2915707	1.402845	Mosquito	A	2.875636e-06	1.187371e-07	MF.9	2.451281e-05	1117697	S	C	N	HC	0.1115	0.1721	0
4187	75	S	S	321	A	G	TCA	TCG	Syn	A321G	AG	9	8	8	0	1.040851	0.7285556	1.41631	Mosquito	B	1.180995e-05	6.889282e-07	MF.9	1.591788e-05	1141853	S	C	N	HC	0.1115	0.1721	0
4188	75	S	S	321	A	T	TCA	TCT	Syn	A321T	AT	9	8	8	0	1.419064	0.4633447	2.118973	Mosquito	B	2.369747e-06	1.784832e-07	MF.9	5.912356e-05	1149866	S	C	N	HC	0.1115	0.1721	0
4189	75	S	T	319	T	A	TCA	ACA	NonSyn	T319A	TA	9	1	8	0	0.8500486	0.4208982	1.127951	Human	A	3.680327e-06	2.30523e-07	MF.9	1.691542e-05	1029622	C	C	N	HC	0.1115	0.1721	0
4190	75	S	T	319	T	A	TCA	ACA	NonSyn	T319A	TA	9	0	8	0	0.8845368	0.2249869	1.738305	Mosquito	A	7.166782e-06	3.393327e-07	MF.9	1.660927e-05	1093960	C	C	N	HC	0.1115	0.1721	0
4191	75	S	X	320	C	A	TCA	TAA	NonSyn	C320A	CA	9	6	8	0	0.889617	0.6210448	1.246253	Human	A	2.985888e-06	1.847504e-07	MF.9	2.152007e-05	1029623	X	C	N	HC	0.1115	0.1721	0
4192	75	S	X	320	C	A	TCA	TAA	NonSyn	C320A	CA	9	8	8	0	1.74401	0.4141033	3.380718	Human	B	3.57888e-06	4.588673e-07	MF.9	0.0001713745	1061792	X	C	N	HC	0.1115	0.1721	0
4193	75	S	X	320	C	G	TCA	TGA	NonSyn	C320G	CG	0	9	0	8	0	0	0	Mosquito	A	2.20927e-06	9.740866e-08	MF.9	0	1109683	X	C	L	HC	0.1115	0.1721	0
4194	75	S	X	320	C	G	TCA	TGA	NonSyn	C320G	CG	1	8	1	7	0.2759649	0	0.6899122	Mosquito	B	1.513275e-06	1.225367e-07	MF.9	0	1141852	X	C	D	HC	0.1115	0.1721	0
4195	76	K	E	322	A	G	AAA	GAA	NonSyn	A322G	AG	7	2	0	8	0	0	0	Human	B	1.213945e-05	3.148199e-07	MF.9	1.196845e-05	1077516	C	C	L	HC	0.1823	0.1710	0
4196	76	K	I	323	A	T	AAA	ATA	NonSyn	A323T	AT	1	8	1	7	0	0	0	Human	A	2.37871e-06	1.833534e-07	MF.9	0	1053361	NC	C	L	HC	0.1823	0.1710	0
4197	76	K	K	324	A	G	AAA	AAG	Syn	A324G	AG	9	8	8	0	1.219997	0.3248387	1.763022	Human	A	1.14325e-05	8.091075e-07	MF.9	0.0001494268	1045349	S	C	N	HC	0.1823	0.1710	0
4198	76	K	K	324	A	G	AAA	AAG	Syn	A324G	AG	9	2	8	0	1.013327	0.6373226	1.47291	Mosquito	A	1.210803e-05	6.184859e-07	MF.9	9.647809e-05	1109687	S	C	N	HC	0.1823	0.1710	0
4199	76	K	K	324	A	G	AAA	AAG	Syn	A324G	AG	9	7	8	0	0.8464948	0.4589174	1.641313	Mosquito	B	1.180995e-05	6.889282e-07	MF.9	3.550995e-05	1141856	S	C	N	HC	0.1823	0.1710	0
4200	76	K	N	324	A	C	AAA	AAC	NonSyn	A324C	AC	2	7	1	7	1.408281	0	2.816563	Human	A	2.326514e-06	2.040447e-07	MF.9	0	1036836	C	C	N	HC	0.1823	0.1710	0
4201	76	K	N	324	A	C	AAA	AAC	NonSyn	A324C	AC	9	4	8	0	2.303065	0.4868819	4.130719	Mosquito	B	2.391816e-06	1.394774e-07	MF.9	8.877486e-06	1133343	C	C	N	HC	0.1823	0.1710	0
4202	76	K	R	323	A	G	AAA	AGA	NonSyn	A323G	AG	9	4	8	0	0.670037	0.3113458	0.9061643	Human	B	1.213945e-05	3.148199e-07	MF.9	1.588954e-05	1077517	C	C	D	HC	0.1823	0.1710	0
4203	76	K	R	323	A	G	AAA	AGA	NonSyn	A323G	AG	9	8	8	0	1.011137	0.6309798	1.453728	Mosquito	B	1.180995e-05	6.889282e-07	MF.9	4.88265e-05	1141855	C	C	N	HC	0.1823	0.1710	0
4204	76	K	X	322	A	T	AAA	TAA	NonSyn	A322T	AT	9	9	8	0	1.315369	0.7202033	1.568567	Human	A	2.37871e-06	1.833534e-07	MF.9	5.545887e-05	1053360	X	C	N	HC	0.1823	0.1710	0
4205	76	K	X	322	A	T	AAA	TAA	NonSyn	A322T	AT	9	9	8	0	1.053074	0.5319988	1.467385	Human	B	2.589251e-06	1.43343e-07	MF.9	0.0002313901	1085529	X	C	N	HC	0.1823	0.1710	0
4206	76	K	X	322	A	T	AAA	TAA	NonSyn	A322T	AT	9	8	8	0	1.153958	0.8628995	1.71696	Mosquito	B	2.369747e-06	1.784832e-07	MF.9	4.492999e-05	1149867	X	C	N	HC	0.1823	0.1710	0
4207	77	A	A	327	T	A	GCT	GCA	Syn	T327A	TA	9	2	8	0	1.090849	0.2932757	1.736686	Human	A	3.680327e-06	2.30523e-07	MF.9	0.0001584806	1029626	S	C	N	HC	0.2680	0.1602	0
4208	77	A	A	327	T	C	GCT	GCC	Syn	T327C	TC	9	9	8	0	1.17335	0.8297738	1.38529	Human	A	8.304354e-06	4.831455e-07	MF.9	0.0001232627	1036838	S	C	N	HC	0.2680	0.1602	0
4209	77	A	A	327	T	C	GCT	GCC	Syn	T327C	TC	9	9	8	0	1.073448	0.898174	1.216269	Human	B	8.638697e-06	3.744363e-07	MF.9	0.0003800776	1069007	S	C	N	HC	0.2680	0.1602	0
4210	77	A	A	327	T	C	GCT	GCC	Syn	T327C	TC	9	9	8	0	1.086005	0.8433758	1.269073	Mosquito	A	1.724887e-05	1.124953e-06	MF.9	0.0005499147	1101176	S	C	N	HC	0.2680	0.1602	0
4211	77	A	A	327	T	A	GCT	GCA	Syn	T327A	TA	9	5	8	0	1.641082	0.6972917	2.479939	Mosquito	B	4.312763e-06	3.05777e-07	MF.9	7.92482e-05	1126133	S	C	N	HC	0.2680	0.1602	0
4212	77	A	A	327	T	C	GCT	GCC	Syn	T327C	TC	9	9	8	0	1.182351	0.9762636	1.32902	Mosquito	B	8.756502e-06	5.645669e-07	MF.9	0.0005371267	1133345	S	C	N	HC	0.2680	0.1602	0
4213	77	A	G	326	C	G	GCT	GGT	NonSyn	C326G	CG	1	8	1	7	0	0	0	Human	A	1.604509e-06	2.564144e-07	MF.9	0	1045350	C	C	L	HC	0.2680	0.1602	0
4214	77	A	S	325	G	T	GCT	TCT	NonSyn	G325T	GT	9	3	8	0	0.7218915	0.4435444	1.180582	Human	A	5.90433e-06	1.997031e-07	MF.9	4.130493e-05	1053363	C	C	N	HC	0.2680	0.1602	0
4215	77	A	S	325	G	T	GCT	TCT	NonSyn	G325T	GT	9	3	8	0	1.09793	0.4899299	1.878867	Human	B	7.052585e-06	4.58263e-07	MF.9	2.052452e-05	1085532	C	C	N	HC	0.2680	0.1602	0
4216	77	A	S	325	G	T	GCT	TCT	NonSyn	G325T	GT	9	7	8	0	0.7827116	0.3299919	1.280541	Mosquito	A	2.290083e-05	1.366303e-06	MF.9	5.06854e-05	1117701	C	C	N	HC	0.2680	0.1602	0
4217	77	A	S	325	G	T	GCT	TCT	NonSyn	G325T	GT	9	8	8	0	0.9485073	0.5748409	1.274251	Mosquito	B	7.493022e-06	1.393832e-06	MF.9	8.948946e-05	1149870	C	C	N	HC	0.2680	0.1602	0
4218	77	A	T	325	G	A	GCT	ACT	NonSyn	G325A	GA	9	8	8	0	1.094425	0.6525851	1.493115	Human	A	6.69739e-06	4.668841e-07	MF.9	8.260985e-05	1029624	C	C	N	HC	0.2680	0.1602	0
4219	77	A	T	325	G	A	GCT	ACT	NonSyn	G325A	GA	9	8	8	0	1.113668	0.8826532	1.542856	Human	B	7.684204e-06	4.645403e-07	MF.9	0.0001641962	1061793	C	C	N	HC	0.2680	0.1602	0
4220	77	A	T	325	G	A	GCT	ACT	NonSyn	G325A	GA	9	5	8	0	1.088586	0.3560668	1.594449	Mosquito	A	8.774931e-06	2.38219e-07	MF.9	4.146988e-05	1093962	C	C	N	HC	0.2680	0.1602	0
4221	77	A	T	325	G	A	GCT	ACT	NonSyn	G325A	GA	9	9	8	0	1.179157	0.6565849	1.70173	Mosquito	B	6.112924e-06	3.730988e-07	MF.9	2.684684e-05	1126131	C	C	N	HC	0.2680	0.1602	0
4222	77	A	V	326	C	T	GCT	GTT	NonSyn	C326T	CT	9	9	8	0	0.3112631	0.1634291	0.6069313	Mosquito	A	0.0001578562	6.997471e-06	MF.9	0.0001917842	1117702	NC	C	D	HC	0.2680	0.1602	0
4223	78	I	F	328	A	T	ATT	TTT	NonSyn	A328T	AT	2	7	1	7	0.3094916	0	0.6189832	Mosquito	A	2.875636e-06	1.187371e-07	MF.9	0	1117703	C	C	D	HC	0.1823	0.1489	0
4224	78	I	I	330	T	A	ATT	ATA	Syn	T330A	TA	9	7	8	0	1.635618	0.7221196	2.839761	Human	A	3.680327e-06	2.30523e-07	MF.9	1.207403e-05	1029628	S	C	N	HC	0.1823	0.1489	0
4225	78	I	I	330	T	C	ATT	ATC	Syn	T330C	TC	9	9	8	0	1.098338	0.8712481	1.325427	Human	A	8.304354e-06	4.831455e-07	MF.9	0.0004733019	1036841	S	C	N	HC	0.1823	0.1489	0
4226	78	I	I	330	T	A	ATT	ATA	Syn	T330A	TA	9	6	8	0	1.133982	0.5053429	1.676175	Human	B	4.145682e-06	2.689648e-07	MF.9	3.785943e-06	1061797	S	C	N	HC	0.1823	0.1489	0
4227	78	I	I	330	T	C	ATT	ATC	Syn	T330C	TC	9	9	8	0	1.17369	0.8437652	1.532994	Human	B	8.638697e-06	3.744363e-07	MF.9	0.000465671	1069010	S	C	N	HC	0.1823	0.1489	0
4228	78	I	I	330	T	A	ATT	ATA	Syn	T330A	TA	9	6	8	0	2.292953	0.4674286	3.427743	Mosquito	A	7.166782e-06	3.393327e-07	MF.9	7.551191e-05	1093966	S	C	N	HC	0.1823	0.1489	0
4229	78	I	I	330	T	C	ATT	ATC	Syn	T330C	TC	9	9	8	0	1.209237	0.7942125	1.581049	Mosquito	A	1.724887e-05	1.124953e-06	MF.9	0.0008599967	1101179	S	C	N	HC	0.1823	0.1489	0
4230	78	I	I	330	T	A	ATT	ATA	Syn	T330A	TA	9	9	8	0	1.141644	0.9889344	1.349145	Mosquito	B	4.312763e-06	3.05777e-07	MF.9	0.0001101721	1126135	S	C	N	HC	0.1823	0.1489	0
4231	78	I	I	330	T	C	ATT	ATC	Syn	T330C	TC	9	9	8	0	1.343862	1.061882	1.567563	Mosquito	B	8.756502e-06	5.645669e-07	MF.9	0.0009767177	1133348	S	C	B	HC	0.1823	0.1489	0
4232	78	I	L	328	A	C	ATT	CTT	NonSyn	A328C	AC	2	7	1	7	0.1571599	0	0.3143197	Mosquito	A	3.286083e-06	1.701643e-07	MF.9	0	1101177	C	C	D	HC	0.1823	0.1489	0
4233	78	I	M	330	T	G	ATT	ATG	NonSyn	T330G	TG	9	2	8	0	1.067469	0.7973771	2.232895	Human	A	1.799189e-06	1.556942e-07	MF.9	1.931845e-05	1045354	C	C	N	HC	0.1823	0.1489	0
4234	78	I	M	330	T	G	ATT	ATG	NonSyn	T330G	TG	9	0	8	0	0.9959622	0.7818974	1.08826	Mosquito	B	2.030327e-06	1.119074e-07	MF.9	1.906824e-05	1141861	C	C	N	HC	0.1823	0.1489	0
4235	78	I	N	329	T	A	ATT	AAT	NonSyn	T329A	TA	8	1	8	0	0.885678	0.09770352	1.280353	Mosquito	B	4.312763e-06	3.05777e-07	MF.9	8.694783e-06	1126134	C	C	N	HC	0.1823	0.1489	0
4236	78	I	T	329	T	C	ATT	ACT	NonSyn	T329C	TC	9	5	8	0	1.039034	0.3224411	1.494774	Human	B	8.638697e-06	3.744363e-07	MF.9	7.162782e-05	1069009	NC	C	N	HC	0.1823	0.1489	0
4237	78	I	T	329	T	C	ATT	ACT	NonSyn	T329C	TC	9	8	8	0	0.8188789	0.5991341	1.076518	Mosquito	A	1.724887e-05	1.124953e-06	MF.9	0.0001198402	1101178	NC	C	N	HC	0.1823	0.1489	0
4238	78	I	T	329	T	C	ATT	ACT	NonSyn	T329C	TC	9	9	8	0	1.130267	0.8074725	1.572386	Mosquito	B	8.756502e-06	5.645669e-07	MF.9	0.000149985	1133347	NC	C	N	HC	0.1823	0.1489	0
4239	78	I	V	328	A	G	ATT	GTT	NonSyn	A328G	AG	9	9	8	0	0.8826836	0.6119675	1.112337	Human	A	1.14325e-05	8.091075e-07	MF.9	7.689179e-05	1045352	C	C	N	HC	0.1823	0.1489	0
4240	78	I	V	328	A	G	ATT	GTT	NonSyn	A328G	AG	9	9	8	0	1.14383	0.7559174	1.35675	Human	B	1.213945e-05	3.148199e-07	MF.9	0.0002599303	1077521	C	C	N	HC	0.1823	0.1489	0
4241	78	I	V	328	A	G	ATT	GTT	NonSyn	A328G	AG	9	9	8	0	1.042185	0.7109812	1.320557	Mosquito	B	1.180995e-05	6.889282e-07	MF.9	6.911134e-05	1141859	C	C	N	HC	0.1823	0.1489	0
4242	79	N	D	331	A	G	AAT	GAT	NonSyn	A331G	AG	9	7	8	0	1.023639	0.3832444	1.404616	Human	A	1.14325e-05	8.091075e-07	MF.9	4.310706e-05	1045355	C	C	N	HC	0.1702	0.1484	0
4243	79	N	D	331	A	G	AAT	GAT	NonSyn	A331G	AG	9	4	8	0	0.6878485	0.4336205	0.9069676	Human	B	1.213945e-05	3.148199e-07	MF.9	6.04567e-05	1077524	C	C	D	HC	0.1702	0.1484	0
4244	79	N	D	331	A	G	AAT	GAT	NonSyn	A331G	AG	9	8	8	0	0.6800919	0.5295732	0.9106557	Mosquito	B	1.180995e-05	6.889282e-07	MF.9	6.072307e-05	1141862	C	C	D	HC	0.1702	0.1484	0
4245	79	N	H	331	A	C	AAT	CAT	NonSyn	A331C	AC	9	9	8	0	1.277963	0.6233496	1.932575	Human	A	2.326514e-06	2.040447e-07	MF.9	7.902961e-05	1036842	C	C	N	HC	0.1702	0.1484	0
4246	79	N	H	331	A	C	AAT	CAT	NonSyn	A331C	AC	9	9	8	0	1.141294	0.6171176	1.355225	Human	B	2.288044e-06	1.737362e-07	MF.9	0.0002204891	1069011	C	C	N	HC	0.1702	0.1484	0
4247	79	N	H	331	A	C	AAT	CAT	NonSyn	A331C	AC	9	7	8	0	1.009198	0.74646	1.259662	Mosquito	B	2.391816e-06	1.394774e-07	MF.9	3.559628e-05	1133349	C	C	N	HC	0.1702	0.1484	0
4248	79	N	I	332	A	T	AAT	ATT	NonSyn	A332T	AT	9	2	8	0	0.9196463	0.6359895	1.400878	Human	B	2.589251e-06	1.43343e-07	MF.9	3.434325e-06	1085536	C	C	N	HC	0.1702	0.1484	0
4249	79	N	I	332	A	T	AAT	ATT	NonSyn	A332T	AT	9	1	8	0	1.691277	0.5498955	2.814759	Mosquito	A	2.875636e-06	1.187371e-07	MF.9	2.31662e-05	1117705	C	C	N	HC	0.1702	0.1484	0
4250	79	N	K	333	T	A	AAT	AAA	NonSyn	T333A	TA	9	3	8	0	0.8601038	0.2773428	4.071722	Human	A	3.680327e-06	2.30523e-07	MF.9	1.883049e-05	1029629	C	C	N	HC	0.1702	0.1484	0
4251	79	N	K	333	T	A	AAT	AAA	NonSyn	T333A	TA	9	3	8	0	1.067525	0.3138507	1.8212	Human	B	4.145682e-06	2.689648e-07	MF.9	4.507394e-05	1061798	C	C	N	HC	0.1702	0.1484	0
4252	79	N	K	333	T	G	AAT	AAG	NonSyn	T333G	TG	9	0	8	0	1.819992	0.09845059	3.541534	Mosquito	B	2.030327e-06	1.119074e-07	MF.9	4.171969e-06	1141864	C	C	N	HC	0.1702	0.1484	0
4253	79	N	N	333	T	C	AAT	AAC	Syn	T333C	TC	9	9	8	0	0.9263409	0.6182404	1.173768	Human	A	8.304354e-06	4.831455e-07	MF.9	8.473719e-05	1036844	S	C	N	HC	0.1702	0.1484	0
4254	79	N	N	333	T	C	AAT	AAC	Syn	T333C	TC	9	7	8	0	1.259883	0.658125	1.74785	Human	B	8.638697e-06	3.744363e-07	MF.9	9.708233e-05	1069013	S	C	N	HC	0.1702	0.1484	0
4255	79	N	N	333	T	C	AAT	AAC	Syn	T333C	TC	9	8	8	0	0.9236192	0.582124	1.337861	Mosquito	A	1.724887e-05	1.124953e-06	MF.9	0.000180616	1101182	S	C	N	HC	0.1702	0.1484	0
4256	79	N	N	333	T	C	AAT	AAC	Syn	T333C	TC	9	9	8	0	1.095069	0.9628569	1.322652	Mosquito	B	8.756502e-06	5.645669e-07	MF.9	0.0001668787	1133351	S	C	N	HC	0.1702	0.1484	0
4257	79	N	S	332	A	G	AAT	AGT	NonSyn	A332G	AG	9	4	8	0	1.036353	0.3639653	1.70874	Human	B	1.213945e-05	3.148199e-07	MF.9	2.74746e-05	1077525	C	C	N	HC	0.1702	0.1484	0
4258	79	N	T	332	A	C	AAT	ACT	NonSyn	A332C	AC	9	8	8	0	0.8494832	0.5922487	1.152692	Human	A	2.326514e-06	2.040447e-07	MF.9	2.150512e-05	1036843	C	C	N	HC	0.1702	0.1484	0
4259	79	N	T	332	A	C	AAT	ACT	NonSyn	A332C	AC	9	6	8	0	1.218038	0.3695104	1.642302	Human	B	2.288044e-06	1.737362e-07	MF.9	2.060595e-05	1069012	C	C	N	HC	0.1702	0.1484	0
4260	79	N	T	332	A	C	AAT	ACT	NonSyn	A332C	AC	9	3	8	0	1.61883	0.9394997	2.408651	Mosquito	B	2.391816e-06	1.394774e-07	MF.9	4.821904e-05	1133350	C	C	N	HC	0.1702	0.1484	0
4261	80	V	A	335	T	C	GTT	GCT	NonSyn	T335C	TC	9	9	8	0	1.085979	0.6973405	1.464136	Human	A	8.304354e-06	4.831455e-07	MF.9	7.75935e-05	1036846	NC	C	N	HC	0.2783	0.1528	0
4262	80	V	A	335	T	C	GTT	GCT	NonSyn	T335C	TC	9	6	8	0	0.7954502	0.4594371	1.19208	Human	B	8.638697e-06	3.744363e-07	MF.9	2.802465e-05	1069015	NC	C	N	HC	0.2783	0.1528	0
4263	80	V	A	335	T	C	GTT	GCT	NonSyn	T335C	TC	9	8	8	0	0.9681181	0.7344717	1.402739	Mosquito	B	8.756502e-06	5.645669e-07	MF.9	4.078978e-05	1133353	NC	C	N	HC	0.2783	0.1528	0
4264	80	V	F	334	G	T	GTT	TTT	NonSyn	G334T	GT	9	5	8	0	0.9888567	0.801274	1.38998	Human	A	5.90433e-06	1.997031e-07	MF.9	3.967041e-05	1053368	NC	C	N	HC	0.2783	0.1528	0
4265	80	V	F	334	G	T	GTT	TTT	NonSyn	G334T	GT	9	7	8	0	0.5953127	0.3450373	0.7864666	Mosquito	A	2.290083e-05	1.366303e-06	MF.9	0.0001371132	1117706	NC	C	D	HC	0.2783	0.1528	0
4266	80	V	F	334	G	T	GTT	TTT	NonSyn	G334T	GT	9	9	8	0	1.005166	0.5681417	1.327487	Mosquito	B	7.493022e-06	1.393832e-06	MF.9	7.027683e-05	1149875	NC	C	N	HC	0.2783	0.1528	0
4267	80	V	G	335	T	G	GTT	GGT	NonSyn	T335G	TG	9	9	8	0	0.8938753	0.6602388	1.201885	Human	A	1.799189e-06	1.556942e-07	MF.9	4.505429e-05	1045358	NC	C	N	HC	0.2783	0.1528	0
4268	80	V	G	335	T	G	GTT	GGT	NonSyn	T335G	TG	8	6	8	0	1.411129	0.5806011	2.457466	Human	B	1.80746e-06	1.143024e-07	MF.9	1.050924e-05	1077527	NC	C	N	HC	0.2783	0.1528	0
4269	80	V	G	335	T	G	GTT	GGT	NonSyn	T335G	TG	9	6	8	0	1.384702	0.7287269	1.910493	Mosquito	A	3.486291e-06	1.611304e-07	MF.9	9.022191e-05	1109696	NC	C	N	HC	0.2783	0.1528	0
4270	80	V	G	335	T	G	GTT	GGT	NonSyn	T335G	TG	9	8	8	0	1.049584	0.5858027	1.442614	Mosquito	B	2.030327e-06	1.119074e-07	MF.9	4.723027e-05	1141865	NC	C	N	HC	0.2783	0.1528	0
4271	80	V	I	334	G	A	GTT	ATT	NonSyn	G334A	GA	8	2	8	0	0.9126174	0.2557391	1.393288	Human	B	7.684204e-06	4.645403e-07	MF.9	2.254537e-05	1061799	C	C	N	HC	0.2783	0.1528	0
4272	80	V	I	334	G	A	GTT	ATT	NonSyn	G334A	GA	8	5	8	0	1.325298	0.7661036	1.864294	Mosquito	A	8.774931e-06	2.38219e-07	MF.9	0.0001000556	1093968	C	C	N	HC	0.2783	0.1528	0
4273	80	V	I	334	G	A	GTT	ATT	NonSyn	G334A	GA	9	6	8	0	0.9023059	0.3279308	1.447167	Mosquito	B	6.112924e-06	3.730988e-07	MF.9	2.687055e-05	1126137	C	C	N	HC	0.2783	0.1528	0
4274	80	V	V	336	T	C	GTT	GTC	Syn	T336C	TC	9	9	8	0	0.9848816	0.858049	1.151604	Human	A	8.304354e-06	4.831455e-07	MF.9	9.350926e-05	1036847	S	C	N	HC	0.2783	0.1528	0
4275	80	V	V	336	T	C	GTT	GTC	Syn	T336C	TC	9	9	8	0	1.640326	1.269386	1.946736	Human	B	8.638697e-06	3.744363e-07	MF.9	0.0005563523	1069016	S	C	B	HC	0.2783	0.1528	0
4276	80	V	V	336	T	G	GTT	GTG	Syn	T336G	TG	9	0	8	0	1.284296	0.263673	2.342595	Human	B	1.80746e-06	1.143024e-07	MF.9	2.073362e-05	1077528	S	C	N	HC	0.2783	0.1528	0
4277	80	V	V	336	T	C	GTT	GTC	Syn	T336C	TC	9	9	8	0	1.255816	1.064171	1.639104	Mosquito	A	1.724887e-05	1.124953e-06	MF.9	0.000201546	1101185	S	C	B	HC	0.2783	0.1528	0
4278	80	V	V	336	T	A	GTT	GTA	Syn	T336A	TA	9	2	8	0	0.9125685	0.1603412	1.573107	Mosquito	B	4.312763e-06	3.05777e-07	MF.9	3.751555e-05	1126139	S	C	N	HC	0.2783	0.1528	0
4279	80	V	V	336	T	C	GTT	GTC	Syn	T336C	TC	9	9	8	0	1.162553	0.7974447	1.447097	Mosquito	B	8.756502e-06	5.645669e-07	MF.9	0.0002459353	1133354	S	C	N	HC	0.2783	0.1528	0
4280	80	V	V	336	T	G	GTT	GTG	Syn	T336G	TG	9	3	8	0	1.558676	1.269679	2.251346	Mosquito	B	2.030327e-06	1.119074e-07	MF.9	5.627333e-05	1141866	S	C	B	HC	0.2783	0.1528	0
4281	81	L	F	339	G	T	TTG	TTT	NonSyn	G339T	GT	9	3	8	0	0.8941965	0.5167798	1.122431	Mosquito	B	7.493022e-06	1.393832e-06	MF.9	4.07123e-05	1149876	C	C	N	HC	0.2470	0.1630	0
4282	81	L	L	337	T	C	TTG	CTG	Syn	T337C	TC	9	9	8	0	1.676239	1.129806	2.286207	Human	A	8.304354e-06	4.831455e-07	MF.9	0.0004225838	1036848	S	C	B	HC	0.2470	0.1630	0
4283	81	L	L	337	T	C	TTG	CTG	Syn	T337C	TC	9	8	8	0	1.244377	0.7583099	1.528343	Human	B	8.638697e-06	3.744363e-07	MF.9	0.000222153	1069017	S	C	N	HC	0.2470	0.1630	0
4284	81	L	L	339	G	A	TTG	TTA	Syn	G339A	GA	8	1	8	0	0.9811426	0.2659244	1.542438	Mosquito	A	8.774931e-06	2.38219e-07	MF.9	1.069835e-05	1093973	S	C	N	HC	0.2470	0.1630	0
4285	81	L	L	337	T	C	TTG	CTG	Syn	T337C	TC	9	8	8	0	1.031922	0.946406	1.125413	Mosquito	A	1.724887e-05	1.124953e-06	MF.9	0.0005836538	1101186	S	C	N	HC	0.2470	0.1630	0
4286	81	L	L	337	T	C	TTG	CTG	Syn	T337C	TC	9	9	8	0	1.185359	1.083541	1.309732	Mosquito	B	8.756502e-06	5.645669e-07	MF.9	0.0002323692	1133355	S	C	B	HC	0.2470	0.1630	0
4287	81	L	M	337	T	A	TTG	ATG	NonSyn	T337A	TA	9	7	8	0	1.323014	0.4142761	1.964252	Human	A	3.680327e-06	2.30523e-07	MF.9	2.347688e-05	1029633	C	C	N	HC	0.2470	0.1630	0
4288	81	L	M	337	T	A	TTG	ATG	NonSyn	T337A	TA	9	7	8	0	1.161846	0.6277031	1.583654	Human	B	4.145682e-06	2.689648e-07	MF.9	5.968288e-05	1061802	C	C	N	HC	0.2470	0.1630	0
4289	81	L	M	337	T	A	TTG	ATG	NonSyn	T337A	TA	9	3	8	0	1.153016	0.4924179	1.602399	Mosquito	B	4.312763e-06	3.05777e-07	MF.9	1.233819e-05	1126140	C	C	N	HC	0.2470	0.1630	0
4290	81	L	S	338	T	C	TTG	TCG	NonSyn	T338C	TC	9	3	8	0	0.9398698	0.023377	1.565916	Mosquito	A	1.724887e-05	1.124953e-06	MF.9	2.960682e-05	1101187	NC	C	N	HC	0.2470	0.1630	0
4291	81	L	S	338	T	C	TTG	TCG	NonSyn	T338C	TC	9	3	8	0	0.7626167	0.5739289	1.003924	Mosquito	B	8.756502e-06	5.645669e-07	MF.9	2.635324e-05	1133356	NC	C	N	HC	0.2470	0.1630	0
4292	81	L	V	337	T	G	TTG	GTG	NonSyn	T337G	TG	9	0	8	0	1.263343	0.8105019	2.076383	Human	A	1.799189e-06	1.556942e-07	MF.9	1.173844e-05	1045360	C	C	N	HC	0.2470	0.1630	0
4293	81	L	V	337	T	G	TTG	GTG	NonSyn	T337G	TG	9	0	8	0	1.295647	0.1997473	2.391546	Mosquito	A	3.486291e-06	1.611304e-07	MF.9	3.865257e-06	1109698	C	C	N	HC	0.2470	0.1630	0
4294	81	L	X	338	T	A	TTG	TAG	NonSyn	T338A	TA	0	9	0	8	0	0	0	Human	A	3.680327e-06	2.30523e-07	MF.9	0	1029634	X	C	L	HC	0.2470	0.1630	0
4295	81	L	X	338	T	A	TTG	TAG	NonSyn	T338A	TA	1	8	0	8	0	0	0	Human	B	4.145682e-06	2.689648e-07	MF.9	0	1061803	X	C	L	HC	0.2470	0.1630	0
4296	81	L	X	338	T	A	TTG	TAG	NonSyn	T338A	TA	0	9	0	8	0	0	0	Mosquito	A	7.166782e-06	3.393327e-07	MF.9	0	1093972	X	C	L	HC	0.2470	0.1630	0
4297	81	L	X	338	T	A	TTG	TAG	NonSyn	T338A	TA	1	8	0	8	0	0	0	Mosquito	B	4.312763e-06	3.05777e-07	MF.9	0	1126141	X	C	L	HC	0.2470	0.1630	0
4298	82	R	I	341	G	T	AGA	ATA	NonSyn	G341T	GT	9	0	8	0	0.9063951	0.3065029	1.336734	Human	A	5.90433e-06	1.997031e-07	MF.9	2.122006e-05	1053371	NC	C	N	HC	0.1671	0.1761	0
4299	82	R	I	341	G	T	AGA	ATA	NonSyn	G341T	GT	9	3	8	0	0.6840008	0.3147692	1.669433	Human	B	7.052585e-06	4.58263e-07	MF.9	1.715869e-05	1085540	NC	C	N	HC	0.1671	0.1761	0
4300	82	R	I	341	G	T	AGA	ATA	NonSyn	G341T	GT	9	7	8	0	0.7443146	0.1916602	1.260817	Mosquito	A	2.290083e-05	1.366303e-06	MF.9	9.671907e-05	1117709	NC	C	N	HC	0.1671	0.1761	0
4301	82	R	I	341	G	T	AGA	ATA	NonSyn	G341T	GT	9	3	8	0	0.9580743	0.2915803	1.887819	Mosquito	B	7.493022e-06	1.393832e-06	MF.9	2.874112e-05	1149878	NC	C	N	HC	0.1671	0.1761	0
4302	82	R	K	341	G	A	AGA	AAA	NonSyn	G341A	GA	9	8	8	0	1.135503	0.9451309	1.606219	Mosquito	B	6.112924e-06	3.730988e-07	MF.9	6.158811e-05	1126143	C	C	N	HC	0.1671	0.1761	0
4303	82	R	R	342	A	G	AGA	AGG	Syn	A342G	AG	9	4	8	0	0.7693701	0.3253419	1.213398	Human	B	1.213945e-05	3.148199e-07	MF.9	1.454431e-05	1077532	S	C	N	HC	0.1671	0.1761	0
4304	82	R	S	342	A	C	AGA	AGC	NonSyn	A342C	AC	2	7	1	7	0.8398037	0	2.099509	Human	A	2.326514e-06	2.040447e-07	MF.9	0	1036853	NC	C	N	HC	0.1671	0.1761	0
4305	82	R	S	342	A	T	AGA	AGT	NonSyn	A342T	AT	9	0	8	0	0.8927696	0.5263196	1.031077	Human	B	2.589251e-06	1.43343e-07	MF.9	1.745317e-05	1085541	NC	C	N	HC	0.1671	0.1761	0
4306	82	R	X	340	A	T	AGA	TGA	NonSyn	A340T	AT	1	8	0	8	0	0	0	Human	A	2.37871e-06	1.833534e-07	MF.9	0	1053370	X	C	L	HC	0.1671	0.1761	0
4307	82	R	X	340	A	T	AGA	TGA	NonSyn	A340T	AT	2	7	1	7	0	0	0.1313039	Human	B	2.589251e-06	1.43343e-07	MF.9	0	1085539	X	C	D	HC	0.1671	0.1761	0
4308	82	R	X	340	A	T	AGA	TGA	NonSyn	A340T	AT	1	8	1	7	0	0	0	Mosquito	A	2.875636e-06	1.187371e-07	MF.9	3.640626e-06	1117708	X	C	L	HC	0.1671	0.1761	0
4309	83	G	A	344	G	C	GGG	GCG	NonSyn	G344C	GC	9	1	8	0	0.8308143	0.3824547	1.150117	Human	A	3.700457e-06	2.674076e-07	MF.9	2.38639e-05	1036855	C	C	N	HC	0.2609	0.1859	0
4310	83	G	A	344	G	C	GGG	GCG	NonSyn	G344C	GC	9	2	8	0	0.5790496	0.3009372	0.7550221	Mosquito	A	1.263716e-05	7.038203e-07	MF.9	6.702188e-05	1101193	C	C	D	HC	0.2609	0.1859	0
4311	83	G	E	344	G	A	GGG	GAG	NonSyn	G344A	GA	8	5	8	0	0.7845999	0.4237322	3.742229	Human	B	7.684204e-06	4.645403e-07	MF.9	2.715284e-05	1061807	C	C	N	HC	0.2609	0.1859	0
4312	83	G	E	344	G	A	GGG	GAG	NonSyn	G344A	GA	9	5	8	0	1.351823	0.8945952	1.911127	Mosquito	A	8.774931e-06	2.38219e-07	MF.9	3.723438e-05	1093976	C	C	N	HC	0.2609	0.1859	0
4313	83	G	G	345	G	A	GGG	GGA	Syn	G345A	GA	9	5	8	0	1.494437	0.1239775	3.446618	Human	A	6.69739e-06	4.668841e-07	MF.9	4.747166e-05	1029639	S	C	N	HC	0.2609	0.1859	0
4314	83	G	G	345	G	C	GGG	GGC	Syn	G345C	GC	9	4	8	0	2.768009	0.3904222	4.854418	Human	A	3.700457e-06	2.674076e-07	MF.9	3.085658e-05	1036856	S	C	N	HC	0.2609	0.1859	0
4315	83	G	G	345	G	A	GGG	GGA	Syn	G345A	GA	9	3	8	0	0.7588206	0.468186	2.921264	Mosquito	A	8.774931e-06	2.38219e-07	MF.9	1.460611e-05	1093977	S	C	N	HC	0.2609	0.1859	0
4316	83	G	G	345	G	C	GGG	GGC	Syn	G345C	GC	9	4	8	0	1.09383	0.1539811	1.839103	Mosquito	A	1.263716e-05	7.038203e-07	MF.9	4.01668e-05	1101194	S	C	N	HC	0.2609	0.1859	0
4317	83	G	G	345	G	A	GGG	GGA	Syn	G345A	GA	9	8	8	0	1.152011	0.831575	1.880072	Mosquito	B	6.112924e-06	3.730988e-07	MF.9	4.320232e-05	1126146	S	C	N	HC	0.2609	0.1859	0
4318	83	G	G	345	G	C	GGG	GGC	Syn	G345C	GC	9	7	8	0	1.046941	0.7979352	1.421192	Mosquito	B	3.432927e-06	9.570197e-07	MF.9	1.851528e-05	1133363	S	C	N	HC	0.2609	0.1859	0
4319	83	G	G	345	G	T	GGG	GGT	Syn	G345T	GT	9	3	8	0	1.008981	0.7311355	1.481422	Mosquito	B	7.493022e-06	1.393832e-06	MF.9	3.08588e-05	1149882	S	C	N	HC	0.2609	0.1859	0
4320	83	G	R	343	G	A	GGG	AGG	NonSyn	G343A	GA	9	9	8	0	1.054205	0.7136082	1.423145	Human	A	6.69739e-06	4.668841e-07	MF.9	0.0001321328	1029637	C	C	N	HC	0.2609	0.1859	0
4321	83	G	R	343	G	A	GGG	AGG	NonSyn	G343A	GA	9	7	8	0	1.005286	0.7136836	1.820515	Human	B	7.684204e-06	4.645403e-07	MF.9	7.911926e-05	1061806	C	C	N	HC	0.2609	0.1859	0
4322	83	G	R	343	G	A	GGG	AGG	NonSyn	G343A	GA	9	5	8	0	0.705128	0.3203977	1.182621	Mosquito	B	6.112924e-06	3.730988e-07	MF.9	3.277647e-05	1126144	C	C	N	HC	0.2609	0.1859	0
4323	83	G	V	344	G	T	GGG	GTG	NonSyn	G344T	GT	9	3	8	0	1.145943	0.1382545	2.741476	Human	B	7.052585e-06	4.58263e-07	MF.9	4.223776e-05	1085543	NC	C	N	HC	0.2609	0.1859	0
4324	83	G	V	344	G	T	GGG	GTG	NonSyn	G344T	GT	9	6	8	0	0.5886059	0.226682	0.8858032	Mosquito	A	2.290083e-05	1.366303e-06	MF.9	9.308595e-05	1117712	NC	C	D	HC	0.2609	0.1859	0
4325	83	G	W	343	G	T	GGG	TGG	NonSyn	G343T	GT	9	3	8	0	0.9724143	0.3747061	1.570122	Human	A	5.90433e-06	1.997031e-07	MF.9	1.65166e-05	1053373	NC	C	N	HC	0.2609	0.1859	0
4326	83	G	W	343	G	T	GGG	TGG	NonSyn	G343T	GT	9	4	8	0	0.9464302	0.5547152	1.071936	Human	B	7.052585e-06	4.58263e-07	MF.9	2.05124e-05	1085542	NC	C	N	HC	0.2609	0.1859	0
4327	84	F	C	347	T	G	TTC	TGC	NonSyn	T347G	TG	9	0	8	0	1.12702	0.2280159	1.984663	Mosquito	B	2.030327e-06	1.119074e-07	MF.9	1.275489e-05	1141872	NC	C	N	HC	0.1759	0.1928	0
4328	84	F	F	348	C	T	TTC	TTT	Syn	C348T	CT	9	9	8	0	0.5335103	0.3316123	0.76946	Mosquito	A	0.0001578562	6.997471e-06	MF.9	0.0002662308	1117714	S	C	D	HC	0.1759	0.1928	0
4329	84	F	F	348	C	T	TTC	TTT	Syn	C348T	CT	9	9	8	0	0.3387187	0.2732695	0.5106185	Mosquito	B	0.0002034795	7.793136e-06	MF.9	0.0003702301	1149883	S	C	D	HC	0.1759	0.1928	0
4330	84	F	L	348	C	A	TTC	TTA	NonSyn	C348A	CA	3	6	1	7	0	0	0	Human	A	2.985888e-06	1.847504e-07	MF.9	6.962948e-06	1029642	C	C	L	HC	0.1759	0.1928	0
4331	84	F	L	346	T	C	TTC	CTC	NonSyn	T346C	TC	9	9	8	0	1.046427	0.4794868	1.804278	Human	A	8.304354e-06	4.831455e-07	MF.9	0.0001202977	1036857	C	C	N	HC	0.1759	0.1928	0
4332	84	F	L	346	T	C	TTC	CTC	NonSyn	T346C	TC	9	8	8	0	0.9759065	0.8046166	1.237343	Human	B	8.638697e-06	3.744363e-07	MF.9	9.193139e-05	1069026	C	C	N	HC	0.1759	0.1928	0
4333	84	F	L	346	T	C	TTC	CTC	NonSyn	T346C	TC	9	9	8	0	1.051583	0.8568462	1.367068	Mosquito	A	1.724887e-05	1.124953e-06	MF.9	0.0003722406	1101195	C	C	N	HC	0.1759	0.1928	0
4334	84	F	L	348	C	G	TTC	TTG	NonSyn	C348G	CG	1	8	1	7	0	0	0	Mosquito	A	2.20927e-06	9.740866e-08	MF.9	0	1109704	C	C	L	HC	0.1759	0.1928	0
4335	84	F	L	346	T	C	TTC	CTC	NonSyn	T346C	TC	9	9	8	0	1.063211	0.8250539	1.215203	Mosquito	B	8.756502e-06	5.645669e-07	MF.9	0.0001443372	1133364	C	C	N	HC	0.1759	0.1928	0
4336	84	F	S	347	T	C	TTC	TCC	NonSyn	T347C	TC	8	1	8	0	0.6469144	0.1216771	0.9461434	Human	B	8.638697e-06	3.744363e-07	MF.9	2.720143e-05	1069027	NC	C	D	HC	0.1759	0.1928	0
4337	84	F	S	347	T	C	TTC	TCC	NonSyn	T347C	TC	9	3	8	0	0.6169089	0.3347987	1.066049	Mosquito	A	1.724887e-05	1.124953e-06	MF.9	3.83199e-05	1101196	NC	C	N	HC	0.1759	0.1928	0
4338	84	F	S	347	T	C	TTC	TCC	NonSyn	T347C	TC	8	5	8	0	0.8734712	0.3108206	1.40722	Mosquito	B	8.756502e-06	5.645669e-07	MF.9	3.188721e-05	1133365	NC	C	N	HC	0.1759	0.1928	0
4339	84	F	Y	347	T	A	TTC	TAC	NonSyn	T347A	TA	9	1	8	0	1.685229	0.571791	2.71337	Human	A	3.680327e-06	2.30523e-07	MF.9	4.806121e-06	1029641	C	C	N	HC	0.1759	0.1928	0
4340	85	R	G	349	A	G	AGG	GGG	NonSyn	A349G	AG	8	1	1	7	0	0	0	Mosquito	B	1.180995e-05	6.889282e-07	MF.9	8.239217e-06	1141874	C	C	L	HC	0.1137	0.2035	0
4341	85	R	K	350	G	A	AGG	AAG	NonSyn	G350A	GA	9	1	8	0	0.8666235	0.66625	1.431786	Human	A	6.69739e-06	4.668841e-07	MF.9	1.140912e-05	1029643	C	C	N	HC	0.1137	0.2035	0
4342	85	R	K	350	G	A	AGG	AAG	NonSyn	G350A	GA	9	0	8	0	0.6135795	0.2569703	0.993811	Mosquito	B	6.112924e-06	3.730988e-07	MF.9	1.641591e-05	1126150	C	C	D	HC	0.1137	0.2035	0
4343	85	R	R	351	G	A	AGG	AGA	Syn	G351A	GA	9	1	8	0	0.9999951	0.6615735	1.858756	Human	A	6.69739e-06	4.668841e-07	MF.9	9.19555e-06	1029644	S	C	N	HC	0.1137	0.2035	0
4344	85	R	R	349	A	C	AGG	CGG	Syn	A349C	AC	9	8	8	0	0.9420904	0.7807467	1.308243	Human	A	2.326514e-06	2.040447e-07	MF.9	3.655881e-05	1036859	S	C	N	HC	0.1137	0.2035	0
4345	85	R	R	351	G	A	AGG	AGA	Syn	G351A	GA	9	4	8	0	1.072293	0.4383261	2.074988	Human	B	7.684204e-06	4.645403e-07	MF.9	3.112929e-05	1061813	S	C	N	HC	0.1137	0.2035	0
4346	85	R	R	349	A	C	AGG	CGG	Syn	A349C	AC	9	7	8	0	1.338026	0.3940477	1.893368	Human	B	2.288044e-06	1.737362e-07	MF.9	4.411105e-05	1069028	S	C	N	HC	0.1137	0.2035	0
4347	85	R	R	351	G	A	AGG	AGA	Syn	G351A	GA	9	0	8	0	0.5710314	0.3521894	1.816407	Mosquito	A	8.774931e-06	2.38219e-07	MF.9	1.098089e-05	1093982	S	C	N	HC	0.1137	0.2035	0
4348	85	R	R	351	G	A	AGG	AGA	Syn	G351A	GA	9	5	8	0	0.9004185	0.3692801	1.431557	Mosquito	B	6.112924e-06	3.730988e-07	MF.9	3.306906e-05	1126151	S	C	N	HC	0.1137	0.2035	0
4349	85	R	R	349	A	C	AGG	CGG	Syn	A349C	AC	9	3	8	0	1.110212	0.4134106	1.887382	Mosquito	B	2.391816e-06	1.394774e-07	MF.9	8.033237e-05	1133366	S	C	N	HC	0.1137	0.2035	0
4350	85	R	S	351	G	C	AGG	AGC	NonSyn	G351C	GC	5	4	1	7	0.1686557	0	0.4216394	Human	A	3.700457e-06	2.674076e-07	MF.9	2.298888e-06	1036861	NC	C	D	HC	0.1137	0.2035	0
4351	85	R	S	351	G	T	AGG	AGT	NonSyn	G351T	GT	9	6	8	0	0.8682398	0.2429064	1.238526	Mosquito	A	2.290083e-05	1.366303e-06	MF.9	8.784709e-05	1117717	NC	C	N	HC	0.1137	0.2035	0
4352	85	R	W	349	A	T	AGG	TGG	NonSyn	A349T	AT	9	5	8	0	1.014581	0.5884873	1.312261	Human	A	2.37871e-06	1.833534e-07	MF.9	1.599448e-05	1053377	C	C	N	HC	0.1137	0.2035	0
4353	85	R	W	349	A	T	AGG	TGG	NonSyn	A349T	AT	2	7	1	7	0.812088	0	2.03022	Mosquito	A	2.875636e-06	1.187371e-07	MF.9	0	1117715	C	C	N	HC	0.1137	0.2035	0
4354	86	K	I	353	A	T	AAA	ATA	NonSyn	A353T	AT	0	9	0	8	0	0	0	Mosquito	A	2.875636e-06	1.187371e-07	MF.9	0	1117719	NC	C	L	HC	0.1184	0.2118	0
4355	86	K	K	354	A	G	AAA	AAG	Syn	A354G	AG	9	2	8	0	0.4759275	0.3865636	0.5898805	Human	A	1.14325e-05	8.091075e-07	MF.9	1.190859e-05	1045370	S	C	D	HC	0.1184	0.2118	0
4356	86	K	K	354	A	G	AAA	AAG	Syn	A354G	AG	9	7	8	0	0.8093207	0.630816	0.9518409	Mosquito	B	1.180995e-05	6.889282e-07	MF.9	2.846607e-05	1141877	S	C	D	HC	0.1184	0.2118	0
4357	86	K	N	354	A	C	AAA	AAC	NonSyn	A354C	AC	2	7	1	7	0	0	1.35443	Human	A	2.326514e-06	2.040447e-07	MF.9	0	1036864	C	C	N	HC	0.1184	0.2118	0
4358	86	K	Q	352	A	C	AAA	CAA	NonSyn	A352C	AC	9	4	8	0	0.9493778	0.1544268	1.879537	Mosquito	A	3.286083e-06	1.701643e-07	MF.9	1.4828e-05	1101200	C	C	N	HC	0.1184	0.2118	0
4359	86	K	T	353	A	C	AAA	ACA	NonSyn	A353C	AC	1	8	1	7	0	0	0	Human	A	2.326514e-06	2.040447e-07	MF.9	2.385195e-06	1036863	C	C	L	HC	0.1184	0.2118	0
4360	86	K	T	353	A	C	AAA	ACA	NonSyn	A353C	AC	0	9	0	8	0	0	0	Human	B	2.288044e-06	1.737362e-07	MF.9	0	1069032	C	C	L	HC	0.1184	0.2118	0
4361	86	K	X	352	A	T	AAA	TAA	NonSyn	A352T	AT	9	2	8	0	1.101982	0.3431565	1.934665	Mosquito	A	2.875636e-06	1.187371e-07	MF.9	5.560498e-05	1117718	X	C	N	HC	0.1184	0.2118	0
4362	87	E	D	357	G	C	GAG	GAC	NonSyn	G357C	GC	9	1	8	0	0.6731212	0.3307043	0.9938397	Human	A	3.700457e-06	2.674076e-07	MF.9	1.934732e-05	1036867	C	C	D	HC	0.1184	0.2173	0
4363	87	E	D	357	G	T	GAG	GAT	NonSyn	G357T	GT	9	1	8	0	0.7918259	0.1557225	1.166383	Human	B	7.052585e-06	4.58263e-07	MF.9	2.168351e-05	1085554	C	C	N	HC	0.1184	0.2173	0
4364	87	E	D	357	G	T	GAG	GAT	NonSyn	G357T	GT	9	6	8	0	0.6848061	0.3735752	0.9995918	Mosquito	A	2.290083e-05	1.366303e-06	MF.9	0.000114016	1117723	C	C	D	HC	0.1184	0.2173	0
4365	87	E	D	357	G	T	GAG	GAT	NonSyn	G357T	GT	9	4	8	0	1.000713	0.2306645	2.065607	Mosquito	B	7.493022e-06	1.393832e-06	MF.9	5.5161e-05	1149892	C	C	N	HC	0.1184	0.2173	0
4366	87	E	E	357	G	A	GAG	GAA	Syn	G357A	GA	9	4	8	0	1.035455	0.5181249	1.532924	Human	A	6.69739e-06	4.668841e-07	MF.9	7.255244e-06	1029646	S	C	N	HC	0.1184	0.2173	0
4367	87	E	E	357	G	A	GAG	GAA	Syn	G357A	GA	9	2	8	0	1.114233	0.6109019	1.542118	Mosquito	A	8.774931e-06	2.38219e-07	MF.9	3.040426e-05	1093984	S	C	N	HC	0.1184	0.2173	0
4368	87	E	E	357	G	A	GAG	GAA	Syn	G357A	GA	9	9	8	0	0.9576651	0.7040703	1.273805	Mosquito	B	6.112924e-06	3.730988e-07	MF.9	6.205613e-05	1126153	S	C	N	HC	0.1184	0.2173	0
4369	87	E	G	356	A	G	GAG	GGG	NonSyn	A356G	AG	7	2	1	7	0.04947287	0	0.09894575	Human	A	1.14325e-05	8.091075e-07	MF.9	2.440125e-06	1045371	C	C	D	HC	0.1184	0.2173	0
4370	87	E	K	355	G	A	GAG	AAG	NonSyn	G355A	GA	9	6	8	0	1.776368	0.5418944	3.166165	Human	A	6.69739e-06	4.668841e-07	MF.9	2.376878e-05	1029645	C	C	N	HC	0.1184	0.2173	0
4371	87	E	K	355	G	A	GAG	AAG	NonSyn	G355A	GA	9	4	8	0	0.739815	0.4812632	0.8690909	Mosquito	B	6.112924e-06	3.730988e-07	MF.9	2.872128e-05	1126152	C	C	D	HC	0.1184	0.2173	0
4372	87	E	Q	355	G	C	GAG	CAG	NonSyn	G355C	GC	1	8	0	8	0	0	0	Mosquito	B	3.432927e-06	9.570197e-07	MF.9	8.837318e-06	1133372	C	C	L	HC	0.1184	0.2173	0
4373	87	E	V	356	A	T	GAG	GTG	NonSyn	A356T	AT	2	7	1	7	0	0	0.286351	Human	A	2.37871e-06	1.833534e-07	MF.9	0	1053384	C	C	D	HC	0.1184	0.2173	0
4374	87	E	V	356	A	T	GAG	GTG	NonSyn	A356T	AT	3	6	1	7	0.6255978	0	1.251196	Human	B	2.589251e-06	1.43343e-07	MF.9	0	1085553	C	C	N	HC	0.1184	0.2173	0
4375	87	E	V	356	A	T	GAG	GTG	NonSyn	A356T	AT	1	8	1	7	0.3820469	0	0.9551173	Mosquito	A	2.875636e-06	1.187371e-07	MF.9	0	1117722	C	C	D	HC	0.1184	0.2173	0
4376	87	E	X	355	G	T	GAG	TAG	NonSyn	G355T	GT	5	4	1	7	0.03144403	0	0.06288807	Human	A	5.90433e-06	1.997031e-07	MF.9	2.376878e-06	1053383	X	C	D	HC	0.1184	0.2173	0
4377	87	E	X	355	G	T	GAG	TAG	NonSyn	G355T	GT	4	5	1	7	0	0	0.3112392	Human	B	7.052585e-06	4.58263e-07	MF.9	2.416568e-06	1085552	X	C	D	HC	0.1184	0.2173	0
4378	87	E	X	355	G	T	GAG	TAG	NonSyn	G355T	GT	5	4	1	7	0	0	0	Mosquito	B	7.493022e-06	1.393832e-06	MF.9	1.325598e-05	1149890	X	C	L	HC	0.1184	0.2173	0
4379	88	I	F	358	A	T	ATT	TTT	NonSyn	A358T	AT	9	1	8	0	1.203252	0.335148	1.970345	Human	A	2.37871e-06	1.833534e-07	MF.9	7.487234e-06	1053386	C	C	N	HC	0.1424	0.2301	0
4380	88	I	I	360	T	C	ATT	ATC	Syn	T360C	TC	9	9	8	0	1.022799	0.5471769	1.616048	Human	A	8.304354e-06	4.831455e-07	MF.9	3.97326e-05	1036870	S	C	N	HC	0.1424	0.2301	0
4381	88	I	I	360	T	C	ATT	ATC	Syn	T360C	TC	9	6	8	0	1.141179	0.4302644	1.504248	Human	B	8.638697e-06	3.744363e-07	MF.9	2.506605e-05	1069039	S	C	N	HC	0.1424	0.2301	0
4382	88	I	I	360	T	A	ATT	ATA	Syn	T360A	TA	9	4	8	0	1.890323	0.6110246	3.298281	Mosquito	A	7.166782e-06	3.393327e-07	MF.9	8.500579e-05	1093986	S	C	N	HC	0.1424	0.2301	0
4383	88	I	I	360	T	C	ATT	ATC	Syn	T360C	TC	8	7	8	0	1.426943	0.7257137	2.272548	Mosquito	A	1.724887e-05	1.124953e-06	MF.9	0.0001133411	1101208	S	C	N	HC	0.1424	0.2301	0
4384	88	I	I	360	T	C	ATT	ATC	Syn	T360C	TC	9	8	8	0	1.172107	0.9510908	1.359365	Mosquito	B	8.756502e-06	5.645669e-07	MF.9	0.0001034943	1133377	S	C	N	HC	0.1424	0.2301	0
4385	88	I	L	358	A	C	ATT	CTT	NonSyn	A358C	AC	1	8	1	7	0.2265873	0	0.5664683	Mosquito	A	3.286083e-06	1.701643e-07	MF.9	0	1101206	C	C	D	HC	0.1424	0.2301	0
4386	88	I	T	359	T	C	ATT	ACT	NonSyn	T359C	TC	9	9	8	0	0.8591088	0.5704279	1.247673	Human	A	8.304354e-06	4.831455e-07	MF.9	3.514824e-05	1036869	NC	C	N	HC	0.1424	0.2301	0
4387	88	I	T	359	T	C	ATT	ACT	NonSyn	T359C	TC	9	6	8	0	1.004072	0.9091969	1.126121	Human	B	8.638697e-06	3.744363e-07	MF.9	2.873473e-05	1069038	NC	C	N	HC	0.1424	0.2301	0
4388	88	I	T	359	T	C	ATT	ACT	NonSyn	T359C	TC	9	7	8	0	0.7356509	0.4926104	1.628028	Mosquito	A	1.724887e-05	1.124953e-06	MF.9	9.491895e-05	1101207	NC	C	N	HC	0.1424	0.2301	0
4389	88	I	T	359	T	C	ATT	ACT	NonSyn	T359C	TC	9	9	8	0	1.047727	0.8335094	1.261944	Mosquito	B	8.756502e-06	5.645669e-07	MF.9	0.0001237609	1133376	NC	C	N	HC	0.1424	0.2301	0
4390	88	I	V	358	A	G	ATT	GTT	NonSyn	A358G	AG	9	7	8	0	0.785633	0.5800741	1.018641	Human	B	1.213945e-05	3.148199e-07	MF.9	5.571539e-05	1077541	C	C	N	HC	0.1424	0.2301	0
4391	88	I	V	358	A	G	ATT	GTT	NonSyn	A358G	AG	9	6	8	0	0.6968004	0.4324462	0.9893912	Mosquito	B	1.180995e-05	6.889282e-07	MF.9	2.390869e-05	1141879	C	C	D	HC	0.1424	0.2301	0
4392	89	G	A	362	G	C	GGA	GCA	NonSyn	G362C	GC	9	4	8	0	0.999614	0.2873375	1.403527	Mosquito	A	1.263716e-05	7.038203e-07	MF.9	6.057816e-05	1101210	C	C	N	HC	0.2224	0.2536	0
4393	89	G	A	362	G	C	GGA	GCA	NonSyn	G362C	GC	9	3	8	0	0.9745015	0.5792054	1.482524	Mosquito	B	3.432927e-06	9.570197e-07	MF.9	2.463224e-05	1133379	C	C	N	HC	0.2224	0.2536	0
4394	89	G	G	363	A	C	GGA	GGC	Syn	A363C	AC	2	7	1	7	0	0	1.361555	Human	B	2.288044e-06	1.737362e-07	MF.9	0	1069042	S	C	N	HC	0.2224	0.2536	0
4395	89	G	R	361	G	A	GGA	AGA	NonSyn	G361A	GA	9	3	8	0	0.9398914	0.5085908	1.19248	Human	A	6.69739e-06	4.668841e-07	MF.9	1.007377e-05	1029649	C	C	N	HC	0.2224	0.2536	0
4396	89	G	R	361	G	A	GGA	AGA	NonSyn	G361A	GA	9	9	8	0	1.341004	0.8701947	2.410464	Human	B	7.684204e-06	4.645403e-07	MF.9	0.0002074426	1061818	C	C	N	HC	0.2224	0.2536	0
4397	89	G	R	361	G	C	GGA	CGA	NonSyn	G361C	GC	9	1	8	0	0.8495131	0.1430379	1.358513	Mosquito	A	1.263716e-05	7.038203e-07	MF.9	4.381301e-05	1101209	C	C	N	HC	0.2224	0.2536	0
4398	89	G	V	362	G	T	GGA	GTA	NonSyn	G362T	GT	9	4	8	0	1.556674	0.347081	2.611161	Human	A	5.90433e-06	1.997031e-07	MF.9	2.54473e-05	1053388	NC	C	N	HC	0.2224	0.2536	0
4399	89	G	V	362	G	T	GGA	GTA	NonSyn	G362T	GT	9	7	8	0	0.6603754	0.3917847	0.9531271	Mosquito	A	2.290083e-05	1.366303e-06	MF.9	4.846253e-05	1117726	NC	C	D	HC	0.2224	0.2536	0
4400	89	G	V	362	G	T	GGA	GTA	NonSyn	G362T	GT	9	7	8	0	0.9534195	0.690362	1.278855	Mosquito	B	7.493022e-06	1.393832e-06	MF.9	6.15806e-05	1149895	NC	C	N	HC	0.2224	0.2536	0
4401	89	G	X	361	G	T	GGA	TGA	NonSyn	G361T	GT	9	6	8	0	0.71256	0.4336279	1.05539	Mosquito	A	2.290083e-05	1.366303e-06	MF.9	7.567701e-05	1117725	X	C	N	HC	0.2224	0.2536	0
4402	90	R	K	365	G	A	AGG	AAG	NonSyn	G365A	GA	9	3	8	0	1.117832	0.3055021	2.020601	Human	A	6.69739e-06	4.668841e-07	MF.9	1.812335e-05	1029651	C	C	N	HC	0.2164	0.2779	0
4403	90	R	K	365	G	A	AGG	AAG	NonSyn	G365A	GA	9	6	8	0	1.498771	0.8350039	2.174941	Mosquito	A	8.774931e-06	2.38219e-07	MF.9	0.0001257714	1093989	C	C	N	HC	0.2164	0.2779	0
4404	90	R	K	365	G	A	AGG	AAG	NonSyn	G365A	GA	9	7	8	0	1.382608	1.190243	1.91918	Mosquito	B	6.112924e-06	3.730988e-07	MF.9	0.0001093238	1126158	C	C	B	HC	0.2164	0.2779	0
4405	90	R	M	365	G	T	AGG	ATG	NonSyn	G365T	GT	9	0	8	0	0.6632277	0.1687304	1.069256	Human	A	5.90433e-06	1.997031e-07	MF.9	1.294525e-05	1053391	C	C	N	HC	0.2164	0.2779	0
4406	90	R	R	366	G	A	AGG	AGA	Syn	G366A	GA	9	3	8	0	0.9486983	0.5875687	1.447472	Human	A	6.69739e-06	4.668841e-07	MF.9	3.646612e-05	1029652	S	C	N	HC	0.2164	0.2779	0
4407	90	R	R	366	G	A	AGG	AGA	Syn	G366A	GA	9	9	8	0	1.320767	1.097803	1.643629	Human	B	7.684204e-06	4.645403e-07	MF.9	7.092337e-05	1061821	S	C	B	HC	0.2164	0.2779	0
4408	90	R	R	366	G	A	AGG	AGA	Syn	G366A	GA	9	5	8	0	1.735439	0.1271189	3.267012	Mosquito	B	6.112924e-06	3.730988e-07	MF.9	3.344843e-05	1126159	S	C	N	HC	0.2164	0.2779	0
4409	90	R	S	366	G	T	AGG	AGT	NonSyn	G366T	GT	9	2	8	0	0.4029222	0.09927242	0.6143315	Mosquito	A	2.290083e-05	1.366303e-06	MF.9	6.571571e-05	1117730	NC	C	D	HC	0.2164	0.2779	0
4410	90	R	S	366	G	T	AGG	AGT	NonSyn	G366T	GT	9	2	8	0	0.4373491	0.08882255	0.7312737	Mosquito	B	7.493022e-06	1.393832e-06	MF.9	2.572956e-05	1149899	NC	C	D	HC	0.2164	0.2779	0
4411	90	R	T	365	G	C	AGG	ACG	NonSyn	G365C	GC	9	4	8	0	0.6994842	0.1259324	1.166867	Human	A	3.700457e-06	2.674076e-07	MF.9	5.178101e-06	1036875	C	C	N	HC	0.2164	0.2779	0
4412	90	R	T	365	G	C	AGG	ACG	NonSyn	G365C	GC	9	2	8	0	1.166093	0.1492248	1.625558	Human	B	4.230269e-06	2.592937e-07	MF.9	1.466623e-05	1069044	C	C	N	HC	0.2164	0.2779	0
4413	90	R	W	364	A	T	AGG	TGG	NonSyn	A364T	AT	3	6	1	7	0	0	0	Human	B	2.589251e-06	1.43343e-07	MF.9	0	1085559	C	C	L	HC	0.2164	0.2779	0
4414	91	M	I	369	G	T	ATG	ATT	NonSyn	G369T	GT	9	7	8	0	1.047732	0.6568239	1.817342	Human	A	5.90433e-06	1.997031e-07	MF.9	2.594841e-05	1053394	C	C	N	HC	0.2783	0.2978	0
4415	91	M	I	369	G	T	ATG	ATT	NonSyn	G369T	GT	9	4	8	0	0.6166335	0.2438987	0.9449218	Mosquito	A	2.290083e-05	1.366303e-06	MF.9	6.137429e-05	1117732	C	C	D	HC	0.2783	0.2978	0
4416	91	M	I	369	G	T	ATG	ATT	NonSyn	G369T	GT	9	3	8	0	0.7693523	0.6001894	0.9545635	Mosquito	B	7.493022e-06	1.393832e-06	MF.9	7.611249e-05	1149901	C	C	D	HC	0.2783	0.2978	0
4417	91	M	K	368	T	A	ATG	AAG	NonSyn	T368A	TA	9	0	8	0	1.097702	0.4901913	1.705214	Human	A	3.680327e-06	2.30523e-07	MF.9	1.307627e-05	1029653	C	C	N	HC	0.2783	0.2978	0
4418	91	M	K	368	T	A	ATG	AAG	NonSyn	T368A	TA	9	1	8	0	1.198544	0.393323	1.878721	Human	B	4.145682e-06	2.689648e-07	MF.9	7.296696e-06	1061822	C	C	N	HC	0.2783	0.2978	0
4419	91	M	K	368	T	A	ATG	AAG	NonSyn	T368A	TA	9	1	8	0	0.975961	0.6136329	1.376985	Mosquito	A	7.166782e-06	3.393327e-07	MF.9	2.869252e-05	1093991	C	C	N	HC	0.2783	0.2978	0
4420	91	M	K	368	T	A	ATG	AAG	NonSyn	T368A	TA	9	7	8	0	1.130112	0.423134	1.777797	Mosquito	B	4.312763e-06	3.05777e-07	MF.9	1.848741e-05	1126160	C	C	N	HC	0.2783	0.2978	0
4421	91	M	R	368	T	G	ATG	AGG	NonSyn	T368G	TG	9	7	8	0	0.9104242	0.7398412	1.132489	Human	A	1.799189e-06	1.556942e-07	MF.9	1.569153e-05	1045378	C	C	N	HC	0.2783	0.2978	0
4422	91	M	R	368	T	G	ATG	AGG	NonSyn	T368G	TG	9	9	8	0	0.9922077	0.5472473	1.306191	Human	B	1.80746e-06	1.143024e-07	MF.9	0.0001094504	1077547	C	C	N	HC	0.2783	0.2978	0
4423	91	M	R	368	T	G	ATG	AGG	NonSyn	T368G	TG	9	1	8	0	1.480146	0.9166063	2.366123	Mosquito	B	2.030327e-06	1.119074e-07	MF.9	1.320529e-05	1141885	C	C	N	HC	0.2783	0.2978	0
4424	91	M	T	368	T	C	ATG	ACG	NonSyn	T368C	TC	9	9	8	0	1.339578	0.7760181	1.96936	Human	A	8.304354e-06	4.831455e-07	MF.9	4.968983e-05	1036878	C	C	N	HC	0.2783	0.2978	0
4425	91	M	T	368	T	C	ATG	ACG	NonSyn	T368C	TC	9	7	8	0	1.114345	0.6706808	1.666793	Human	B	8.638697e-06	3.744363e-07	MF.9	4.621241e-05	1069047	C	C	N	HC	0.2783	0.2978	0
4426	91	M	T	368	T	C	ATG	ACG	NonSyn	T368C	TC	9	3	8	0	0.6832522	0.4250874	0.9346098	Mosquito	B	8.756502e-06	5.645669e-07	MF.9	2.905165e-05	1133385	C	C	D	HC	0.2783	0.2978	0
4427	91	M	V	367	A	G	ATG	GTG	NonSyn	A367G	AG	6	3	1	7	0	0	0	Mosquito	A	1.210803e-05	6.184859e-07	MF.9	2.045207e-05	1109715	C	C	L	HC	0.2783	0.2978	0
4428	92	L	L	372	G	A	CTG	CTA	Syn	G372A	GA	9	4	8	0	1.018645	0.8683835	1.634848	Human	A	6.69739e-06	4.668841e-07	MF.9	1.796964e-05	1029657	S	C	N	HC	0.3286	0.3099	0
4429	92	L	L	372	G	C	CTG	CTC	Syn	G372C	GC	9	8	8	0	0.9207872	0.7635808	1.097801	Human	A	3.700457e-06	2.674076e-07	MF.9	2.8238e-05	1036881	S	C	N	HC	0.3286	0.3099	0
4430	92	L	L	372	G	C	CTG	CTC	Syn	G372C	GC	9	8	8	0	1.033539	0.7738268	1.297329	Human	B	4.230269e-06	2.592937e-07	MF.9	5.413395e-05	1069050	S	C	N	HC	0.3286	0.3099	0
4431	92	L	L	372	G	A	CTG	CTA	Syn	G372A	GA	9	4	8	0	1.140771	0.8009381	1.564794	Mosquito	A	8.774931e-06	2.38219e-07	MF.9	9.841188e-05	1093995	S	C	N	HC	0.3286	0.3099	0
4432	92	L	L	370	C	T	CTG	TTG	Syn	C370T	CT	9	9	8	0	0.5738237	0.4731398	0.6695773	Mosquito	A	0.0001578562	6.997471e-06	MF.9	0.0003409904	1117733	S	C	D	HC	0.3286	0.3099	0
4433	92	L	L	372	G	A	CTG	CTA	Syn	G372A	GA	9	1	8	0	0.5414446	0.08526231	1.064734	Mosquito	B	6.112924e-06	3.730988e-07	MF.9	1.31317e-05	1126164	S	C	N	HC	0.3286	0.3099	0
4434	92	L	L	372	G	C	CTG	CTC	Syn	G372C	GC	9	9	8	0	1.233349	0.7483461	1.718351	Mosquito	B	3.432927e-06	9.570197e-07	MF.9	0.000123438	1133388	S	C	N	HC	0.3286	0.3099	0
4435	92	L	P	371	T	C	CTG	CCG	NonSyn	T371C	TC	8	3	8	0	0.6863179	0.2322073	1.314678	Mosquito	B	8.756502e-06	5.645669e-07	MF.9	2.121172e-05	1133387	C	C	N	HC	0.3286	0.3099	0
4436	92	L	R	371	T	G	CTG	CGG	NonSyn	T371G	TG	2	7	1	7	0.5637534	0	1.409383	Human	B	1.80746e-06	1.143024e-07	MF.9	0	1077549	C	C	N	HC	0.3286	0.3099	0
4437	93	N	D	373	A	G	AAC	GAC	NonSyn	A373G	AG	9	1	8	0	0.8036016	0.5157487	1.135355	Mosquito	A	1.210803e-05	6.184859e-07	MF.9	5.366712e-05	1109719	C	C	N	HC	0.3215	0.3217	0
4438	93	N	D	373	A	G	AAC	GAC	NonSyn	A373G	AG	9	8	8	0	1.089251	0.6374195	1.722584	Mosquito	B	1.180995e-05	6.889282e-07	MF.9	5.360134e-05	1141888	C	C	N	HC	0.3215	0.3217	0
4439	93	N	H	373	A	C	AAC	CAC	NonSyn	A373C	AC	9	1	8	0	1.192545	0.4805856	1.888165	Mosquito	B	2.391816e-06	1.394774e-07	MF.9	1.60804e-05	1133389	C	C	N	HC	0.3215	0.3217	0
4440	93	N	K	375	C	A	AAC	AAA	NonSyn	C375A	CA	1	8	1	7	0.2491819	0	0.4983638	Human	A	2.985888e-06	1.847504e-07	MF.9	0	1029658	C	C	D	HC	0.3215	0.3217	0
4441	93	N	K	375	C	A	AAC	AAA	NonSyn	C375A	CA	3	6	1	7	0	0	0.2104132	Human	B	3.57888e-06	4.588673e-07	MF.9	0	1061827	C	C	D	HC	0.3215	0.3217	0
4442	93	N	K	375	C	G	AAC	AAG	NonSyn	C375G	CG	9	2	8	0	0.8220761	0.6335225	1.137624	Mosquito	A	2.20927e-06	9.740866e-08	MF.9	1.261082e-05	1109721	C	C	N	HC	0.3215	0.3217	0
4443	93	N	K	375	C	G	AAC	AAG	NonSyn	C375G	CG	9	9	8	0	1.169786	0.7992561	1.493934	Mosquito	B	1.513275e-06	1.225367e-07	MF.9	4.712153e-05	1141890	C	C	N	HC	0.3215	0.3217	0
4444	93	N	N	375	C	T	AAC	AAT	Syn	C375T	CT	9	9	8	0	0.5573143	0.2949096	0.7768685	Mosquito	A	0.0001578562	6.997471e-06	MF.9	0.0003152704	1117737	S	C	D	HC	0.3215	0.3217	0
4445	93	N	S	374	A	G	AAC	AGC	NonSyn	A374G	AG	9	6	8	0	0.7528047	0.5516905	1.612824	Mosquito	A	1.210803e-05	6.184859e-07	MF.9	3.286838e-05	1109720	C	C	N	HC	0.3215	0.3217	0
4446	93	N	S	374	A	G	AAC	AGC	NonSyn	A374G	AG	9	9	8	0	1.074974	0.7955648	1.489061	Mosquito	B	1.180995e-05	6.889282e-07	MF.9	9.309625e-05	1141889	C	C	N	HC	0.3215	0.3217	0
4447	93	N	T	374	A	C	AAC	ACC	NonSyn	A374C	AC	9	1	8	0	2.482204	0.656016	3.701983	Mosquito	B	2.391816e-06	1.394774e-07	MF.9	2.393904e-05	1133390	C	C	N	HC	0.3215	0.3217	0
4448	93	N	Y	373	A	T	AAC	TAC	NonSyn	A373T	AT	3	6	1	7	0.2757946	0	0.6894864	Human	B	2.589251e-06	1.43343e-07	MF.9	2.341016e-06	1085566	C	C	D	HC	0.3215	0.3217	0
4449	93	N	Y	373	A	T	AAC	TAC	NonSyn	A373T	AT	2	7	1	7	0.1018452	0	0.2546129	Mosquito	B	2.369747e-06	1.784832e-07	MF.9	0	1149904	C	C	D	HC	0.3215	0.3217	0
4450	94	I	F	376	A	T	ATC	TTC	NonSyn	A376T	AT	8	1	8	0	0.6575635	0.3503727	1.309669	Human	B	2.589251e-06	1.43343e-07	MF.9	6.846095e-06	1085569	C	C	N	HC	0.2951	0.3429	0
4451	94	I	I	378	C	A	ATC	ATA	Syn	C378A	CA	9	1	8	0	0.7361826	0.2381031	1.234262	Mosquito	A	6.508077e-06	1.996644e-07	MF.9	3.913163e-05	1093998	S	C	N	HC	0.2951	0.3429	0
4452	94	I	L	376	A	C	ATC	CTC	NonSyn	A376C	AC	9	9	8	0	0.8328728	0.5172609	1.318852	Human	B	2.288044e-06	1.737362e-07	MF.9	3.194844e-05	1069053	C	C	N	HC	0.2951	0.3429	0
4453	94	I	L	376	A	C	ATC	CTC	NonSyn	A376C	AC	9	4	8	0	1.146842	0.2563862	9.666625	Mosquito	A	3.286083e-06	1.701643e-07	MF.9	8.384127e-06	1101222	C	C	N	HC	0.2951	0.3429	0
4454	94	I	L	376	A	C	ATC	CTC	NonSyn	A376C	AC	9	6	8	0	1.067136	0.2975771	1.934878	Mosquito	B	2.391816e-06	1.394774e-07	MF.9	4.182569e-05	1133391	C	C	N	HC	0.2951	0.3429	0
4455	94	I	M	378	C	G	ATC	ATG	NonSyn	C378G	CG	9	7	8	0	1.034609	0.7380548	1.331162	Human	A	1.604509e-06	2.564144e-07	MF.9	1.540694e-05	1045386	C	C	N	HC	0.2951	0.3429	0
4456	94	I	M	378	C	G	ATC	ATG	NonSyn	C378G	CG	9	7	8	0	1.130667	0.3468275	2.057788	Human	B	1.455268e-06	7.022105e-08	MF.9	7.692899e-05	1077555	C	C	N	HC	0.2951	0.3429	0
4457	94	I	M	378	C	G	ATC	ATG	NonSyn	C378G	CG	9	1	8	0	1.064446	0.5504954	1.874033	Mosquito	B	1.513275e-06	1.225367e-07	MF.9	2.345949e-05	1141893	C	C	N	HC	0.2951	0.3429	0
4458	94	I	N	377	T	A	ATC	AAC	NonSyn	T377A	TA	4	5	1	7	0	0	1.024074	Human	A	3.680327e-06	2.30523e-07	MF.9	2.566215e-06	1029659	C	C	N	HC	0.2951	0.3429	0
4459	94	I	N	377	T	A	ATC	AAC	NonSyn	T377A	TA	2	7	1	7	0	0	0	Mosquito	B	4.312763e-06	3.05777e-07	MF.9	0	1126166	C	C	L	HC	0.2951	0.3429	0
4460	94	I	S	377	T	G	ATC	AGC	NonSyn	T377G	TG	2	7	0	8	0	0	0	Human	A	1.799189e-06	1.556942e-07	MF.9	0	1045385	NC	C	L	HC	0.2951	0.3429	0
4461	94	I	T	377	T	C	ATC	ACC	NonSyn	T377C	TC	9	9	8	0	1.100231	0.8473609	1.389046	Human	A	8.304354e-06	4.831455e-07	MF.9	0.0002412242	1036885	NC	C	N	HC	0.2951	0.3429	0
4462	94	I	T	377	T	C	ATC	ACC	NonSyn	T377C	TC	9	9	8	0	1.084156	0.3317493	1.460359	Human	B	8.638697e-06	3.744363e-07	MF.9	8.820402e-05	1069054	NC	C	N	HC	0.2951	0.3429	0
4463	94	I	T	377	T	C	ATC	ACC	NonSyn	T377C	TC	9	6	8	0	1.389502	1.052981	2.375312	Mosquito	A	1.724887e-05	1.124953e-06	MF.9	0.000176132	1101223	NC	C	B	HC	0.2951	0.3429	0
4464	94	I	T	377	T	C	ATC	ACC	NonSyn	T377C	TC	9	8	8	0	1.363172	0.5951138	1.815604	Mosquito	B	8.756502e-06	5.645669e-07	MF.9	0.0001442456	1133392	NC	C	N	HC	0.2951	0.3429	0
4465	94	I	V	376	A	G	ATC	GTC	NonSyn	A376G	AG	9	3	8	0	0.8125082	0.4752815	1.240857	Mosquito	A	1.210803e-05	6.184859e-07	MF.9	0.000129954	1109722	C	C	N	HC	0.2951	0.3429	0
4466	94	I	V	376	A	G	ATC	GTC	NonSyn	A376G	AG	9	5	8	0	1.001058	0.1472788	2.078312	Mosquito	B	1.180995e-05	6.889282e-07	MF.9	3.398337e-05	1141891	C	C	N	HC	0.2951	0.3429	0
4467	95	L	F	381	G	T	TTG	TTT	NonSyn	G381T	GT	4	5	0	8	0	0	0	Human	A	5.90433e-06	1.997031e-07	MF.9	2.523564e-06	1053402	C	C	L	HC	0.3182	0.3636	0
4468	95	L	F	381	G	T	TTG	TTT	NonSyn	G381T	GT	4	5	0	8	0	0	0	Human	B	7.052585e-06	4.58263e-07	MF.9	4.432634e-06	1085571	C	C	L	HC	0.3182	0.3636	0
4469	95	L	F	381	G	T	TTG	TTT	NonSyn	G381T	GT	7	2	1	7	0.09234173	0	0.2308543	Mosquito	A	2.290083e-05	1.366303e-06	MF.9	4.230602e-06	1117740	C	C	D	HC	0.3182	0.3636	0
4470	95	L	F	381	G	T	TTG	TTT	NonSyn	G381T	GT	4	5	1	7	0	0	0	Mosquito	B	7.493022e-06	1.393832e-06	MF.9	0	1149909	C	C	L	HC	0.3182	0.3636	0
4471	95	L	L	381	G	A	TTG	TTA	Syn	G381A	GA	9	4	8	0	0.846036	0.4508445	2.615435	Human	A	6.69739e-06	4.668841e-07	MF.9	7.570691e-06	1029663	S	C	N	HC	0.3182	0.3636	0
4472	95	L	L	379	T	C	TTG	CTG	Syn	T379C	TC	9	5	8	0	1.128332	0.3577168	2.021174	Human	A	8.304354e-06	4.831455e-07	MF.9	2.053283e-05	1036886	S	C	N	HC	0.3182	0.3636	0
4473	95	L	L	381	G	A	TTG	TTA	Syn	G381A	GA	9	2	8	0	0.6775866	0.4278877	0.9331555	Human	B	7.684204e-06	4.645403e-07	MF.9	1.551422e-05	1061832	S	C	D	HC	0.3182	0.3636	0
4474	95	L	L	379	T	C	TTG	CTG	Syn	T379C	TC	9	9	8	0	1.079431	0.6958006	1.611513	Human	B	8.638697e-06	3.744363e-07	MF.9	0.0001366556	1069055	S	C	N	HC	0.3182	0.3636	0
4475	95	L	L	381	G	A	TTG	TTA	Syn	G381A	GA	9	1	8	0	1.194068	0.3603719	1.77191	Mosquito	A	8.774931e-06	2.38219e-07	MF.9	2.115301e-05	1094001	S	C	N	HC	0.3182	0.3636	0
4476	95	L	L	379	T	C	TTG	CTG	Syn	T379C	TC	9	6	8	0	1.152248	0.3361304	2.403948	Mosquito	A	1.724887e-05	1.124953e-06	MF.9	7.309124e-05	1101224	S	C	N	HC	0.3182	0.3636	0
4477	95	L	L	381	G	A	TTG	TTA	Syn	G381A	GA	9	6	8	0	0.8339431	0.6136345	1.127812	Mosquito	B	6.112924e-06	3.730988e-07	MF.9	1.018856e-05	1126170	S	C	N	HC	0.3182	0.3636	0
4478	95	L	L	379	T	C	TTG	CTG	Syn	T379C	TC	9	7	8	0	0.8558319	0.4334216	1.538991	Mosquito	B	8.756502e-06	5.645669e-07	MF.9	7.736066e-05	1133393	S	C	N	HC	0.3182	0.3636	0
4479	95	L	M	379	T	A	TTG	ATG	NonSyn	T379A	TA	9	3	8	0	1.824969	0.9238781	2.718694	Human	A	3.680327e-06	2.30523e-07	MF.9	1.283302e-05	1029661	C	C	N	HC	0.3182	0.3636	0
4480	95	L	S	380	T	C	TTG	TCG	NonSyn	T380C	TC	7	2	1	7	0	0	0	Mosquito	A	1.724887e-05	1.124953e-06	MF.9	1.71822e-05	1101225	NC	C	L	HC	0.3182	0.3636	0
4481	95	L	V	379	T	G	TTG	GTG	NonSyn	T379G	TG	9	1	8	0	2.561651	1.078302	4.434773	Human	A	1.799189e-06	1.556942e-07	MF.9	5.133207e-06	1045387	C	C	B	HC	0.3182	0.3636	0
4482	95	L	V	379	T	G	TTG	GTG	NonSyn	T379G	TG	8	1	8	0	0.9984418	0.3658393	1.910882	Mosquito	A	3.486291e-06	1.611304e-07	MF.9	2.149742e-05	1109725	C	C	N	HC	0.3182	0.3636	0
4483	95	L	V	379	T	G	TTG	GTG	NonSyn	T379G	TG	8	1	8	0	1.334467	0.7170862	1.776148	Mosquito	B	2.030327e-06	1.119074e-07	MF.9	2.062951e-05	1141894	C	C	N	HC	0.3182	0.3636	0
4484	95	L	X	380	T	A	TTG	TAG	NonSyn	T380A	TA	2	7	0	8	0	0	0	Human	A	3.680327e-06	2.30523e-07	MF.9	0	1029662	X	C	L	HC	0.3182	0.3636	0
4485	95	L	X	380	T	A	TTG	TAG	NonSyn	T380A	TA	2	7	0	8	0	0	0	Human	B	4.145682e-06	2.689648e-07	MF.9	0	1061831	X	C	L	HC	0.3182	0.3636	0
4486	95	L	X	380	T	A	TTG	TAG	NonSyn	T380A	TA	2	7	0	8	0	0	0	Mosquito	B	4.312763e-06	3.05777e-07	MF.9	0	1126169	X	C	L	HC	0.3182	0.3636	0
4487	96	N	H	382	A	C	AAT	CAT	NonSyn	A382C	AC	1	8	0	8	0	0	0	Human	B	2.288044e-06	1.737362e-07	MF.9	0	1069058	C	C	L	HC	0.2364	0.3831	0
4488	96	N	I	383	A	T	AAT	ATT	NonSyn	A383T	AT	9	5	8	0	1.588058	0.4844956	2.691621	Human	A	2.37871e-06	1.833534e-07	MF.9	1.55212e-05	1053404	C	C	N	HC	0.2364	0.3831	0
4489	96	N	I	383	A	T	AAT	ATT	NonSyn	A383T	AT	9	7	8	0	0.950407	0.3549417	1.193398	Human	B	2.589251e-06	1.43343e-07	MF.9	4.609731e-05	1085573	C	C	N	HC	0.2364	0.3831	0
4490	96	N	I	383	A	T	AAT	ATT	NonSyn	A383T	AT	9	2	8	0	1.30188	0.5692043	2.249717	Mosquito	B	2.369747e-06	1.784832e-07	MF.9	2.074839e-05	1149911	C	C	N	HC	0.2364	0.3831	0
4491	96	N	K	384	T	G	AAT	AAG	NonSyn	T384G	TG	8	1	8	0	0.9680395	0.4019517	1.308129	Human	A	1.799189e-06	1.556942e-07	MF.9	5.088256e-06	1045391	C	C	N	HC	0.2364	0.3831	0
4492	96	N	K	384	T	A	AAT	AAA	NonSyn	T384A	TA	8	3	8	0	1.409777	0.1667959	3.205263	Mosquito	A	7.166782e-06	3.393327e-07	MF.9	4.672699e-05	1094002	C	C	N	HC	0.2364	0.3831	0
4493	96	N	K	384	T	A	AAT	AAA	NonSyn	T384A	TA	9	3	8	0	1.21577	0.7943493	2.233349	Mosquito	B	4.312763e-06	3.05777e-07	MF.9	4.127349e-05	1126171	C	C	N	HC	0.2364	0.3831	0
4494	96	N	K	384	T	G	AAT	AAG	NonSyn	T384G	TG	8	4	8	0	0.9388223	0.3857266	1.389009	Mosquito	B	2.030327e-06	1.119074e-07	MF.9	7.480821e-05	1141898	C	C	N	HC	0.2364	0.3831	0
4495	96	N	N	384	T	C	AAT	AAC	Syn	T384C	TC	9	9	8	0	1.08589	0.8825073	1.358292	Human	A	8.304354e-06	4.831455e-07	MF.9	4.833843e-05	1036891	S	C	N	HC	0.2364	0.3831	0
4496	96	N	N	384	T	C	AAT	AAC	Syn	T384C	TC	9	9	8	0	0.9912743	0.676034	1.594469	Human	B	8.638697e-06	3.744363e-07	MF.9	0.0002564946	1069060	S	C	N	HC	0.2364	0.3831	0
4497	96	N	N	384	T	C	AAT	AAC	Syn	T384C	TC	9	8	8	0	1.163583	0.5862001	1.627258	Mosquito	A	1.724887e-05	1.124953e-06	MF.9	6.371862e-05	1101229	S	C	N	HC	0.2364	0.3831	0
4498	96	N	N	384	T	C	AAT	AAC	Syn	T384C	TC	9	9	8	0	1.231148	1.009298	1.64994	Mosquito	B	8.756502e-06	5.645669e-07	MF.9	0.0001986287	1133398	S	C	B	HC	0.2364	0.3831	0
4499	96	N	S	383	A	G	AAT	AGT	NonSyn	A383G	AG	9	3	8	0	0.4828108	0.3430662	0.7808715	Mosquito	B	1.180995e-05	6.889282e-07	MF.9	3.890324e-05	1141897	C	C	D	HC	0.2364	0.3831	0
4500	96	N	Y	382	A	T	AAT	TAT	NonSyn	A382T	AT	9	0	8	0	0.4824973	0.06750652	1.35076	Human	B	2.589251e-06	1.43343e-07	MF.9	8.797938e-06	1085572	C	C	N	HC	0.2364	0.3831	0
4501	97	R	G	385	A	G	AGG	GGG	NonSyn	A385G	AG	9	9	8	0	1.00029	0.3412619	1.336865	Human	B	1.213945e-05	3.148199e-07	MF.9	5.152492e-05	1077561	C	C	N	HC	0.2002	0.4119	0
4502	97	R	G	385	A	G	AGG	GGG	NonSyn	A385G	AG	9	2	8	0	0.7675364	0.3817146	1.192558	Mosquito	A	1.210803e-05	6.184859e-07	MF.9	2.493102e-05	1109730	C	C	N	HC	0.2002	0.4119	0
4503	97	R	G	385	A	G	AGG	GGG	NonSyn	A385G	AG	9	9	8	0	0.6189297	0.5780376	0.7989485	Mosquito	B	1.180995e-05	6.889282e-07	MF.9	3.108921e-05	1141899	C	C	D	HC	0.2002	0.4119	0
4504	97	R	K	386	G	A	AGG	AAG	NonSyn	G386A	GA	9	5	8	0	0.9369824	0.366721	1.545442	Human	B	7.684204e-06	4.645403e-07	MF.9	4.784928e-05	1061834	C	C	N	HC	0.2002	0.4119	0
4505	97	R	K	386	G	A	AGG	AAG	NonSyn	G386A	GA	9	6	8	0	1.064413	0.5574965	1.240486	Mosquito	B	6.112924e-06	3.730988e-07	MF.9	6.012475e-05	1126172	C	C	N	HC	0.2002	0.4119	0
4506	97	R	R	385	A	C	AGG	CGG	Syn	A385C	AC	1	8	0	8	0	0	0	Human	A	2.326514e-06	2.040447e-07	MF.9	0	1036892	S	C	L	HC	0.2002	0.4119	0
4507	97	R	R	387	G	A	AGG	AGA	Syn	G387A	GA	9	6	8	0	1.017526	0.3570882	1.462466	Human	B	7.684204e-06	4.645403e-07	MF.9	2.244276e-05	1061835	S	C	N	HC	0.2002	0.4119	0
4508	97	R	R	387	G	A	AGG	AGA	Syn	G387A	GA	9	2	8	0	0.7077763	0.07253771	1.617333	Mosquito	B	6.112924e-06	3.730988e-07	MF.9	1.874118e-05	1126173	S	C	N	HC	0.2002	0.4119	0
4509	97	R	S	387	G	T	AGG	AGT	NonSyn	G387T	GT	9	0	8	0	0.7632701	0.1713528	1.144819	Human	A	5.90433e-06	1.997031e-07	MF.9	7.937117e-06	1053407	NC	C	N	HC	0.2002	0.4119	0
4510	97	R	T	386	G	C	AGG	ACG	NonSyn	G386C	GC	5	4	1	7	0.1475833	0	0.3689583	Human	B	4.230269e-06	2.592937e-07	MF.9	2.174967e-06	1069062	C	C	D	HC	0.2002	0.4119	0
4511	98	R	K	389	G	A	AGA	AAA	NonSyn	G389A	GA	9	2	8	0	0.9547996	0.1945247	1.848344	Human	A	6.69739e-06	4.668841e-07	MF.9	1.926809e-05	1029667	C	C	N	HC	0.1298	0.4265	0
4512	98	R	K	389	G	A	AGA	AAA	NonSyn	G389A	GA	9	8	8	0	1.709284	0.6621678	2.262416	Mosquito	B	6.112924e-06	3.730988e-07	MF.9	0.000110627	1126174	C	C	N	HC	0.1298	0.4265	0
4513	98	R	R	390	A	G	AGA	AGG	Syn	A390G	AG	9	5	8	0	0.8623374	0.2640594	1.631337	Human	A	1.14325e-05	8.091075e-07	MF.9	4.0031e-05	1045394	S	C	N	HC	0.1298	0.4265	0
4514	98	R	R	390	A	G	AGA	AGG	Syn	A390G	AG	9	9	8	0	0.8367329	0.7037055	1.04442	Mosquito	B	1.180995e-05	6.889282e-07	MF.9	8.686354e-05	1141901	S	C	N	HC	0.1298	0.4265	0
4515	98	R	S	390	A	T	AGA	AGT	NonSyn	A390T	AT	1	8	0	8	0	0	0	Human	B	2.589251e-06	1.43343e-07	MF.9	2.240224e-06	1085579	NC	C	L	HC	0.1298	0.4265	0
4516	98	R	S	390	A	T	AGA	AGT	NonSyn	A390T	AT	1	8	1	7	0	0	0	Mosquito	A	2.875636e-06	1.187371e-07	MF.9	4.405345e-06	1117748	NC	C	L	HC	0.1298	0.4265	0
4517	98	R	S	390	A	C	AGA	AGC	NonSyn	A390C	AC	0	9	0	8	0	0	0	Mosquito	B	2.391816e-06	1.394774e-07	MF.9	0	1133404	NC	C	L	HC	0.1298	0.4265	0
4518	98	R	X	388	A	T	AGA	TGA	NonSyn	A388T	AT	9	3	8	0	1.180335	0.4585962	1.953213	Human	B	2.589251e-06	1.43343e-07	MF.9	3.071179e-05	1085577	X	C	N	HC	0.1298	0.4265	0
4519	99	R	G	391	C	G	CGC	GGC	NonSyn	C391G	CG	9	3	8	0	1.435412	0.5717575	2.180991	Human	A	1.604509e-06	2.564144e-07	MF.9	1.376641e-05	1045395	C	C	N	HC	0.1323	0.4036	0
4520	99	R	H	392	G	A	CGC	CAC	NonSyn	G392A	GA	9	4	8	0	0.9494707	0.5692039	1.391119	Human	A	6.69739e-06	4.668841e-07	MF.9	1.927101e-05	1029669	C	C	N	HC	0.1323	0.4036	0
4521	99	R	H	392	G	A	CGC	CAC	NonSyn	G392A	GA	9	6	8	0	0.8117423	0.6379397	1.313645	Human	B	7.684204e-06	4.645403e-07	MF.9	3.640086e-05	1061838	C	C	N	HC	0.1323	0.4036	0
4522	99	R	H	392	G	A	CGC	CAC	NonSyn	G392A	GA	9	6	8	0	1.066663	0.8845482	1.29679	Mosquito	A	8.774931e-06	2.38219e-07	MF.9	0.000146694	1094007	C	C	N	HC	0.1323	0.4036	0
4523	99	R	H	392	G	A	CGC	CAC	NonSyn	G392A	GA	9	6	8	0	0.8398815	0.4790253	1.158183	Mosquito	B	6.112924e-06	3.730988e-07	MF.9	4.590933e-05	1126176	C	C	N	HC	0.1323	0.4036	0
4524	99	R	L	392	G	T	CGC	CTC	NonSyn	G392T	GT	6	3	1	7	0	0	0.3963476	Human	B	7.052585e-06	4.58263e-07	MF.9	2.275054e-06	1085581	C	C	D	HC	0.1323	0.4036	0
4525	99	R	P	392	G	C	CGC	CCC	NonSyn	G392C	GC	4	5	0	8	0	0	0	Mosquito	A	1.263716e-05	7.038203e-07	MF.9	1.333582e-05	1101236	C	C	L	HC	0.1323	0.4036	0
4526	99	R	P	392	G	C	CGC	CCC	NonSyn	G392C	GC	0	9	0	8	0	0	0	Mosquito	B	3.432927e-06	9.570197e-07	MF.9	0	1133405	C	C	L	HC	0.1323	0.4036	0
4527	99	R	R	393	C	T	CGC	CGT	Syn	C393T	CT	9	9	8	0	0.5591994	0.3380616	0.7644331	Human	A	0.0002554735	2.089311e-05	MF.9	0.0003326763	1053413	S	C	D	HC	0.1323	0.4036	0
4528	99	R	R	393	C	T	CGC	CGT	Syn	C393T	CT	9	9	8	0	0.4152436	0.2664495	0.4982804	Human	B	0.0002635581	1.843403e-05	MF.9	0.0006008813	1085582	S	C	D	HC	0.1323	0.4036	0
4529	99	R	R	393	C	G	CGC	CGG	Syn	C393G	CG	1	8	1	7	0.7058564	0	1.411713	Mosquito	A	2.20927e-06	9.740866e-08	MF.9	0	1109734	S	C	N	HC	0.1323	0.4036	0
4530	99	R	R	393	C	T	CGC	CGT	Syn	C393T	CT	9	9	8	0	0.5346477	0.2540838	1.013059	Mosquito	A	0.0001578562	6.997471e-06	MF.9	0.0003377993	1117751	S	C	N	HC	0.1323	0.4036	0
4531	99	R	R	393	C	G	CGC	CGG	Syn	C393G	CG	9	0	8	0	0.8812826	0.5288083	1.293692	Mosquito	B	1.513275e-06	1.225367e-07	MF.9	8.767008e-06	1141903	S	C	N	HC	0.1323	0.4036	0
4532	99	R	R	393	C	T	CGC	CGT	Syn	C393T	CT	9	9	8	0	0.4224555	0.3369114	0.5835499	Mosquito	B	0.0002034795	7.793136e-06	MF.9	0.0005406322	1149920	S	C	D	HC	0.1323	0.4036	0
4533	100	R	K	395	G	A	AGA	AAA	NonSyn	G395A	GA	9	4	8	0	1.597666	0.1260808	3.161816	Human	B	7.684204e-06	4.645403e-07	MF.9	4.022769e-05	1061840	C	C	N	HC	0.1554	0.3920	1
4534	100	R	K	395	G	A	AGA	AAA	NonSyn	G395A	GA	9	8	8	0	1.120859	0.9797269	1.773498	Mosquito	A	8.774931e-06	2.38219e-07	MF.9	0.0002216466	1094009	C	C	N	HC	0.1554	0.3920	1
4535	100	R	K	395	G	A	AGA	AAA	NonSyn	G395A	GA	9	7	8	0	1.149544	0.3744307	1.949915	Mosquito	B	6.112924e-06	3.730988e-07	MF.9	3.274277e-05	1126178	C	C	N	HC	0.1554	0.3920	1
4536	100	R	R	396	A	G	AGA	AGG	Syn	A396G	AG	9	7	8	0	0.6227588	0.4175251	0.8871804	Human	A	1.14325e-05	8.091075e-07	MF.9	0.0001479805	1045398	S	C	D	HC	0.1554	0.3920	1
4537	100	R	R	396	A	G	AGA	AGG	Syn	A396G	AG	9	5	8	0	0.552452	0.08413429	0.995146	Human	B	1.213945e-05	3.148199e-07	MF.9	2.251461e-05	1077567	S	C	D	HC	0.1554	0.3920	1
4538	100	R	R	396	A	G	AGA	AGG	Syn	A396G	AG	9	8	8	0	0.638401	0.5159602	0.9197755	Mosquito	B	1.180995e-05	6.889282e-07	MF.9	6.192181e-05	1141905	S	C	D	HC	0.1554	0.3920	1
4539	100	R	S	396	A	C	AGA	AGC	NonSyn	A396C	AC	9	4	8	0	1.773015	0.3365564	3.209473	Mosquito	A	3.286083e-06	1.701643e-07	MF.9	0.0001236565	1101239	NC	C	N	HC	0.1554	0.3920	1
4540	100	R	S	396	A	C	AGA	AGC	NonSyn	A396C	AC	9	2	8	0	1.617525	0.3177748	2.359717	Mosquito	B	2.391816e-06	1.394774e-07	MF.9	1.857654e-05	1133408	NC	C	N	HC	0.1554	0.3920	1
4541	100	R	X	394	A	T	AGA	TGA	NonSyn	A394T	AT	1	8	1	7	0	0	0	Mosquito	A	2.875636e-06	1.187371e-07	MF.9	4.506534e-06	1117752	X	C	L	HC	0.1554	0.3920	1
4542	101	S	A	397	T	G	TCT	GCT	NonSyn	T397G	TG	9	3	8	0	0.9233219	0.7696548	1.076989	Mosquito	B	2.030327e-06	1.119074e-07	MF.9	6.282295e-06	1141906	C	C	N	HC	0.1554	0.3878	1
4543	101	S	C	398	C	G	TCT	TGT	NonSyn	C398G	CG	0	9	0	8	0	0	0	Human	A	1.604509e-06	2.564144e-07	MF.9	0	1045400	C	C	L	HC	0.1554	0.3878	1
4544	101	S	C	398	C	G	TCT	TGT	NonSyn	C398G	CG	1	8	1	7	0	0	0	Human	B	1.455268e-06	7.022105e-08	MF.9	2.370741e-06	1077569	C	C	L	HC	0.1554	0.3878	1
4545	101	S	C	398	C	G	TCT	TGT	NonSyn	C398G	CG	0	9	0	8	0	0	0	Mosquito	A	2.20927e-06	9.740866e-08	MF.9	0	1109738	C	C	L	HC	0.1554	0.3878	1
4546	101	S	F	398	C	T	TCT	TTT	NonSyn	C398T	CT	9	9	8	0	0.6763927	0.4001982	0.9719159	Mosquito	A	0.0001578562	6.997471e-06	MF.9	0.0004255807	1117755	NC	C	D	HC	0.1554	0.3878	1
4547	101	S	F	398	C	T	TCT	TTT	NonSyn	C398T	CT	9	9	8	0	0.4738848	0.414061	0.5580676	Mosquito	B	0.0002034795	7.793136e-06	MF.9	0.0005093395	1149924	NC	C	D	HC	0.1554	0.3878	1
4548	101	S	P	397	T	C	TCT	CCT	NonSyn	T397C	TC	9	7	8	0	1.090954	0.7909473	1.414009	Human	A	8.304354e-06	4.831455e-07	MF.9	4.714174e-05	1036902	C	C	N	HC	0.1554	0.3878	1
4549	101	S	P	397	T	C	TCT	CCT	NonSyn	T397C	TC	9	8	8	0	0.7801671	0.4144339	1.051591	Human	B	8.638697e-06	3.744363e-07	MF.9	4.328099e-05	1069071	C	C	N	HC	0.1554	0.3878	1
4550	101	S	P	397	T	C	TCT	CCT	NonSyn	T397C	TC	9	8	8	0	1.02253	0.4794148	1.565644	Mosquito	A	1.724887e-05	1.124953e-06	MF.9	6.960284e-05	1101240	C	C	N	HC	0.1554	0.3878	1
4551	101	S	P	397	T	C	TCT	CCT	NonSyn	T397C	TC	9	6	8	0	1.134484	0.7932614	1.72407	Mosquito	B	8.756502e-06	5.645669e-07	MF.9	4.711721e-05	1133409	C	C	N	HC	0.1554	0.3878	1
4552	101	S	S	399	T	C	TCT	TCC	Syn	T399C	TC	9	9	8	0	1.302761	0.6624977	1.943024	Human	A	8.304354e-06	4.831455e-07	MF.9	3.924007e-05	1036903	S	C	N	HC	0.1554	0.3878	1
4553	101	S	S	399	T	A	TCT	TCA	Syn	T399A	TA	9	4	8	0	1.321468	0.264705	2.378231	Human	B	4.145682e-06	2.689648e-07	MF.9	3.958063e-05	1061843	S	C	N	HC	0.1554	0.3878	1
4554	101	S	S	399	T	C	TCT	TCC	Syn	T399C	TC	9	9	8	0	1.002122	0.4068843	1.777976	Human	B	8.638697e-06	3.744363e-07	MF.9	0.0001001157	1069072	S	C	N	HC	0.1554	0.3878	1
4555	101	S	S	399	T	A	TCT	TCA	Syn	T399A	TA	9	2	8	0	1.203966	0.410963	1.852305	Mosquito	A	7.166782e-06	3.393327e-07	MF.9	0.0001257477	1094012	S	C	N	HC	0.1554	0.3878	1
4556	101	S	S	399	T	C	TCT	TCC	Syn	T399C	TC	9	5	8	0	1.905835	0.273722	3.056372	Mosquito	A	1.724887e-05	1.124953e-06	MF.9	0.000169486	1101241	S	C	N	HC	0.1554	0.3878	1
4557	101	S	S	399	T	A	TCT	TCA	Syn	T399A	TA	9	6	8	0	1.14921	0.4885582	4.881343	Mosquito	B	4.312763e-06	3.05777e-07	MF.9	8.648552e-05	1126181	S	C	N	HC	0.1554	0.3878	1
4558	101	S	S	399	T	C	TCT	TCC	Syn	T399C	TC	9	9	8	0	1.128571	0.9074921	1.439352	Mosquito	B	8.756502e-06	5.645669e-07	MF.9	0.0003491452	1133410	S	C	N	HC	0.1554	0.3878	1
4559	101	S	S	399	T	G	TCT	TCG	Syn	T399G	TG	9	0	8	0	0.8636158	0.6872672	1.197501	Mosquito	B	2.030327e-06	1.119074e-07	MF.9	1.281267e-05	1141908	S	C	N	HC	0.1554	0.3878	1
4560	101	S	T	397	T	A	TCT	ACT	NonSyn	T397A	TA	9	1	8	0	0.8307744	0.5049107	1.109671	Human	A	3.680327e-06	2.30523e-07	MF.9	8.839076e-06	1029672	C	C	N	HC	0.1554	0.3878	1
4561	101	S	T	397	T	A	TCT	ACT	NonSyn	T397A	TA	9	2	8	0	2.037472	0.5271413	4.489424	Human	B	4.145682e-06	2.689648e-07	MF.9	2.164049e-05	1061841	C	C	N	HC	0.1554	0.3878	1
4562	101	S	Y	398	C	A	TCT	TAT	NonSyn	C398A	CA	9	3	8	0	1.756351	0.9111382	3.187838	Human	B	3.57888e-06	4.588673e-07	MF.9	1.185371e-05	1061842	C	C	N	HC	0.1554	0.3878	1
4563	101	S	Y	398	C	A	TCT	TAT	NonSyn	C398A	CA	9	1	8	0	1.185007	0.6759391	1.869177	Mosquito	A	6.508077e-06	1.996644e-07	MF.9	1.636849e-05	1094011	C	C	N	HC	0.1554	0.3878	1
4564	102	A	A	402	A	G	GCA	GCG	Syn	A402G	AG	9	6	8	0	0.6860999	0.1882843	0.9950482	Human	A	1.14325e-05	8.091075e-07	MF.9	7.759469e-05	1045403	S	C	D	HC	0.1349	0.3837	1
4565	102	A	A	402	A	C	GCA	GCC	Syn	A402C	AC	9	4	8	0	1.461437	0.1280105	3.213988	Human	B	2.288044e-06	1.737362e-07	MF.9	1.33199e-05	1069074	S	C	N	HC	0.1349	0.3837	1
4566	102	A	A	402	A	G	GCA	GCG	Syn	A402G	AG	9	6	8	0	0.8777347	0.5158756	1.15374	Human	B	1.213945e-05	3.148199e-07	MF.9	3.551972e-05	1077572	S	C	N	HC	0.1349	0.3837	1
4567	102	A	A	402	A	T	GCA	GCT	Syn	A402T	AT	9	4	8	0	2.121789	0.3508239	3.971208	Human	B	2.589251e-06	1.43343e-07	MF.9	1.997984e-05	1085589	S	C	N	HC	0.1349	0.3837	1
4568	102	A	A	402	A	T	GCA	GCT	Syn	A402T	AT	0	9	0	8	0	0	0	Mosquito	A	2.875636e-06	1.187371e-07	MF.9	0	1117758	S	C	L	HC	0.1349	0.3837	1
4569	102	A	A	402	A	C	GCA	GCC	Syn	A402C	AC	9	1	8	0	0.6996736	0.3695207	1.186599	Mosquito	B	2.391816e-06	1.394774e-07	MF.9	3.267493e-06	1133412	S	C	N	HC	0.1349	0.3837	1
4570	102	A	A	402	A	G	GCA	GCG	Syn	A402G	AG	9	3	8	0	0.9681529	0.4155183	1.341848	Mosquito	B	1.180995e-05	6.889282e-07	MF.9	5.554739e-05	1141910	S	C	N	HC	0.1349	0.3837	1
4571	102	A	A	402	A	T	GCA	GCT	Syn	A402T	AT	9	0	8	0	1.10581	0.5771824	1.678871	Mosquito	B	2.369747e-06	1.784832e-07	MF.9	1.306997e-05	1149927	S	C	N	HC	0.1349	0.3837	1
4572	102	A	G	401	C	G	GCA	GGA	NonSyn	C401G	CG	1	8	1	7	0	0	0.6050246	Mosquito	B	1.513275e-06	1.225367e-07	MF.9	0	1141909	C	C	D	HC	0.1349	0.3837	1
4573	102	A	P	400	G	C	GCA	CCA	NonSyn	G400C	GC	9	0	8	0	1.093807	0.2561163	1.527198	Human	A	3.700457e-06	2.674076e-07	MF.9	9.112503e-06	1036904	NC	C	N	HC	0.1349	0.3837	1
4574	102	A	S	400	G	T	GCA	TCA	NonSyn	G400T	GT	9	4	8	0	1.093212	0.7367953	1.321173	Human	A	5.90433e-06	1.997031e-07	MF.9	2.126251e-05	1053418	C	C	N	HC	0.1349	0.3837	1
4575	102	A	S	400	G	T	GCA	TCA	NonSyn	G400T	GT	9	4	8	0	0.9640697	0.7027618	1.317948	Mosquito	B	7.493022e-06	1.393832e-06	MF.9	4.160732e-05	1149925	C	C	N	HC	0.1349	0.3837	1
4576	102	A	T	400	G	A	GCA	ACA	NonSyn	G400A	GA	9	8	8	0	1.186257	0.8551277	1.848514	Human	A	6.69739e-06	4.668841e-07	MF.9	6.682502e-05	1029675	C	C	N	HC	0.1349	0.3837	1
4577	102	A	T	400	G	A	GCA	ACA	NonSyn	G400A	GA	9	4	8	0	1.278723	0.7480504	1.992483	Human	B	7.684204e-06	4.645403e-07	MF.9	5.534953e-05	1061844	C	C	N	HC	0.1349	0.3837	1
4578	102	A	T	400	G	A	GCA	ACA	NonSyn	G400A	GA	9	6	8	0	1.833765	0.6167218	2.77885	Mosquito	A	8.774931e-06	2.38219e-07	MF.9	0.0001586477	1094013	C	C	N	HC	0.1349	0.3837	1
4579	102	A	T	400	G	A	GCA	ACA	NonSyn	G400A	GA	9	6	8	0	1.339411	0.6056812	2.110997	Mosquito	B	6.112924e-06	3.730988e-07	MF.9	6.401127e-05	1126182	C	C	N	HC	0.1349	0.3837	1
4580	102	A	V	401	C	T	GCA	GTA	NonSyn	C401T	CT	9	9	8	0	0.4672003	0.2984201	0.7464647	Human	B	0.0002635581	1.843403e-05	MF.9	0.0006331675	1085588	NC	C	D	HC	0.1349	0.3837	1
4581	102	A	V	401	C	T	GCA	GTA	NonSyn	C401T	CT	9	9	8	0	1.161717	0.6511324	1.869764	Mosquito	A	0.0001578562	6.997471e-06	MF.9	0.000873276	1117757	NC	C	N	HC	0.1349	0.3837	1
4582	102	A	V	401	C	T	GCA	GTA	NonSyn	C401T	CT	9	9	8	0	0.5801799	0.4493183	0.7132661	Mosquito	B	0.0002034795	7.793136e-06	MF.9	0.0006451003	1149926	NC	C	D	HC	0.1349	0.3837	1
4583	103	G	C	403	G	T	GGC	TGC	NonSyn	G403T	GT	9	5	8	0	1.160823	0.3045362	1.943339	Human	A	5.90433e-06	1.997031e-07	MF.9	1.571462e-05	1053421	C	C	N	HC	0.1702	0.3754	1
4584	103	G	D	404	G	A	GGC	GAC	NonSyn	G404A	GA	9	6	8	0	0.8945552	0.6730442	1.049079	Human	A	6.69739e-06	4.668841e-07	MF.9	5.468453e-05	1029678	C	C	N	HC	0.1702	0.3754	1
4585	103	G	D	404	G	A	GGC	GAC	NonSyn	G404A	GA	9	6	8	0	1.053129	0.8825118	1.156863	Human	B	7.684204e-06	4.645403e-07	MF.9	3.615068e-05	1061847	C	C	N	HC	0.1702	0.3754	1
4586	103	G	G	405	C	A	GGC	GGA	Syn	C405A	CA	9	8	8	0	1.00979	0.7614628	1.501669	Human	A	2.985888e-06	1.847504e-07	MF.9	2.971042e-05	1029679	S	C	N	HC	0.1702	0.3754	1
4587	103	G	G	405	C	A	GGC	GGA	Syn	C405A	CA	9	8	8	0	0.988421	0.6224981	1.720267	Human	B	3.57888e-06	4.588673e-07	MF.9	0.0001358195	1061848	S	C	N	HC	0.1702	0.3754	1
4588	103	G	G	405	C	G	GGC	GGG	Syn	C405G	CG	9	6	8	0	1.180301	0.702729	1.518787	Human	B	1.455268e-06	7.022105e-08	MF.9	2.910417e-05	1077573	S	C	N	HC	0.1702	0.3754	1
4589	103	G	G	405	C	T	GGC	GGT	Syn	C405T	CT	9	9	8	0	0.2944496	0.09057877	0.535724	Human	B	0.0002635581	1.843403e-05	MF.9	0.0006184637	1085592	S	C	D	HC	0.1702	0.3754	1
4590	103	G	G	405	C	A	GGC	GGA	Syn	C405A	CA	9	4	8	0	0.7270162	0.476018	3.751207	Mosquito	A	6.508077e-06	1.996644e-07	MF.9	3.132361e-05	1094017	S	C	N	HC	0.1702	0.3754	1
4591	103	G	G	405	C	T	GGC	GGT	Syn	C405T	CT	9	9	8	0	0.2916989	0.06271134	0.4746685	Mosquito	A	0.0001578562	6.997471e-06	MF.9	0.0002819125	1117761	S	C	D	HC	0.1702	0.3754	1
4592	103	G	G	405	C	A	GGC	GGA	Syn	C405A	CA	9	8	8	0	1.062054	0.7233577	1.274655	Mosquito	B	4.124727e-06	2.499298e-07	MF.9	3.812019e-05	1126186	S	C	N	HC	0.1702	0.3754	1
4593	103	G	S	403	G	A	GGC	AGC	NonSyn	G403A	GA	9	1	8	0	1.052575	0.2713182	1.47046	Human	A	6.69739e-06	4.668841e-07	MF.9	1.885755e-05	1029677	NC	C	N	HC	0.1702	0.3754	1
4594	103	G	S	403	G	A	GGC	AGC	NonSyn	G403A	GA	9	1	8	0	0.317599	0.1988357	1.258204	Human	B	7.684204e-06	4.645403e-07	MF.9	1.849775e-05	1061846	NC	C	N	HC	0.1702	0.3754	1
4595	103	G	S	403	G	A	GGC	AGC	NonSyn	G403A	GA	9	1	8	0	0.8570275	0.4676472	1.181936	Mosquito	B	6.112924e-06	3.730988e-07	MF.9	1.311308e-05	1126184	NC	C	N	HC	0.1702	0.3754	1
4596	103	G	V	404	G	T	GGC	GTC	NonSyn	G404T	GT	9	2	8	0	1.296127	0.4971363	1.90398	Human	A	5.90433e-06	1.997031e-07	MF.9	4.503432e-05	1053422	NC	C	N	HC	0.1702	0.3754	1
4597	103	G	V	404	G	T	GGC	GTC	NonSyn	G404T	GT	9	3	8	0	1.089673	0.1462642	2.06067	Human	B	7.052585e-06	4.58263e-07	MF.9	1.687032e-05	1085591	NC	C	N	HC	0.1702	0.3754	1
4598	103	G	V	404	G	T	GGC	GTC	NonSyn	G404T	GT	9	1	8	0	0.7536251	0.3595107	1.09024	Mosquito	B	7.493022e-06	1.393832e-06	MF.9	3.345433e-05	1149929	NC	C	N	HC	0.1702	0.3754	1
4599	104	M	I	408	G	A	ATG	ATA	NonSyn	G408A	GA	9	9	8	0	0.9686214	0.6341324	1.221154	Human	A	6.69739e-06	4.668841e-07	MF.9	7.968101e-05	1029681	C	C	N	HC	0.1399	0.3673	1
4600	104	M	I	408	G	A	ATG	ATA	NonSyn	G408A	GA	9	9	8	0	1.267289	0.691928	2.246765	Human	B	7.684204e-06	4.645403e-07	MF.9	0.0001759775	1061850	C	C	N	HC	0.1399	0.3673	1
4601	104	M	I	408	G	T	ATG	ATT	NonSyn	G408T	GT	9	7	8	0	1.330991	0.2075339	1.928306	Mosquito	A	2.290083e-05	1.366303e-06	MF.9	0.0002859499	1117763	C	C	N	HC	0.1399	0.3673	1
4602	104	M	I	408	G	A	ATG	ATA	NonSyn	G408A	GA	9	9	8	0	1.124549	0.4751112	1.714185	Mosquito	B	6.112924e-06	3.730988e-07	MF.9	7.746452e-05	1126188	C	C	N	HC	0.1399	0.3673	1
4603	104	M	K	407	T	A	ATG	AAG	NonSyn	T407A	TA	9	7	8	0	1.151947	0.3810296	1.564992	Human	A	3.680327e-06	2.30523e-07	MF.9	2.978318e-05	1029680	C	C	N	HC	0.1399	0.3673	1
4604	104	M	K	407	T	A	ATG	AAG	NonSyn	T407A	TA	9	6	8	0	1.337773	0.6459822	2.029564	Human	B	4.145682e-06	2.689648e-07	MF.9	5.339598e-05	1061849	C	C	N	HC	0.1399	0.3673	1
4605	104	M	K	407	T	A	ATG	AAG	NonSyn	T407A	TA	9	1	8	0	0.917266	0.5062579	1.492169	Mosquito	B	4.312763e-06	3.05777e-07	MF.9	1.404075e-05	1126187	C	C	N	HC	0.1399	0.3673	1
4606	104	M	L	406	A	T	ATG	TTG	NonSyn	A406T	AT	9	2	8	0	1.210264	0.3218736	2.448502	Human	A	2.37871e-06	1.833534e-07	MF.9	1.630848e-05	1053424	C	C	N	HC	0.1399	0.3673	1
4607	104	M	L	406	A	T	ATG	TTG	NonSyn	A406T	AT	9	1	8	0	0.8189079	0.5768818	1.095852	Human	B	2.589251e-06	1.43343e-07	MF.9	1.575735e-05	1085593	C	C	N	HC	0.1399	0.3673	1
4608	104	M	T	407	T	C	ATG	ACG	NonSyn	T407C	TC	9	4	8	0	0.9248759	0.2701006	1.304723	Human	A	8.304354e-06	4.831455e-07	MF.9	2.316469e-05	1036909	C	C	N	HC	0.1399	0.3673	1
4609	104	M	V	406	A	G	ATG	GTG	NonSyn	A406G	AG	9	3	8	0	0.3437309	0.1558373	0.4896112	Human	A	1.14325e-05	8.091075e-07	MF.9	1.304678e-05	1045405	C	C	D	HC	0.1399	0.3673	1
4610	104	M	V	406	A	G	ATG	GTG	NonSyn	A406G	AG	9	7	8	0	0.6102025	0.4123782	0.8451726	Human	B	1.213945e-05	3.148199e-07	MF.9	2.926366e-05	1077574	C	C	D	HC	0.1399	0.3673	1
4611	104	M	V	406	A	G	ATG	GTG	NonSyn	A406G	AG	8	5	8	0	1.38973	0.3452708	1.918747	Mosquito	A	1.210803e-05	6.184859e-07	MF.9	0.0001217693	1109743	C	C	N	HC	0.1399	0.3673	1
4612	105	I	I	411	C	A	ATC	ATA	Syn	C411A	CA	9	9	8	0	1.085086	0.6589587	1.756784	Human	A	2.985888e-06	1.847504e-07	MF.9	6.551905e-05	1029683	S	C	N	HC	0.1229	0.3642	1
4613	105	I	I	411	C	A	ATC	ATA	Syn	C411A	CA	9	9	8	0	1.335293	0.5718108	2.213499	Human	B	3.57888e-06	4.588673e-07	MF.9	0.0001243096	1061852	S	C	N	HC	0.1229	0.3642	1
4614	105	I	I	411	C	T	ATC	ATT	Syn	C411T	CT	9	9	8	0	0.3866224	0.2612119	0.6237844	Human	B	0.0002635581	1.843403e-05	MF.9	0.0004338649	1085596	S	C	D	HC	0.1229	0.3642	1
4615	105	I	I	411	C	T	ATC	ATT	Syn	C411T	CT	9	9	8	0	0.8835923	0.6433841	1.06138	Mosquito	A	0.0001578562	6.997471e-06	MF.9	0.001334723	1117765	S	C	N	HC	0.1229	0.3642	1
4616	105	I	I	411	C	A	ATC	ATA	Syn	C411A	CA	9	9	8	0	1.31876	0.7926132	1.940762	Mosquito	B	4.124727e-06	2.499298e-07	MF.9	4.106132e-05	1126190	S	C	N	HC	0.1229	0.3642	1
4617	105	I	I	411	C	T	ATC	ATT	Syn	C411T	CT	9	9	8	0	0.6898659	0.5324325	0.8472993	Mosquito	B	0.0002034795	7.793136e-06	MF.9	0.0005748585	1149934	S	C	D	HC	0.1229	0.3642	1
4618	105	I	L	409	A	C	ATC	CTC	NonSyn	A409C	AC	9	2	8	0	1.220975	0.2027107	2.239239	Mosquito	B	2.391816e-06	1.394774e-07	MF.9	4.030677e-05	1133418	C	C	N	HC	0.1229	0.3642	1
4619	105	I	S	410	T	G	ATC	AGC	NonSyn	T410G	TG	9	0	8	0	1.866565	0.496484	4.203829	Human	A	1.799189e-06	1.556942e-07	MF.9	1.376718e-05	1045408	NC	C	N	HC	0.1229	0.3642	1
4620	105	I	T	410	T	C	ATC	ACC	NonSyn	T410C	TC	9	5	8	0	1.192184	0.7005003	2.595873	Human	A	8.304354e-06	4.831455e-07	MF.9	2.753437e-05	1036912	NC	C	N	HC	0.1229	0.3642	1
4621	105	I	T	410	T	C	ATC	ACC	NonSyn	T410C	TC	9	3	8	0	0.8406186	0.3862421	1.184174	Human	B	8.638697e-06	3.744363e-07	MF.9	2.472885e-05	1069081	NC	C	N	HC	0.1229	0.3642	1
4622	105	I	T	410	T	C	ATC	ACC	NonSyn	T410C	TC	9	9	8	0	0.9769391	0.8034868	1.173433	Mosquito	A	1.724887e-05	1.124953e-06	MF.9	0.0002854189	1101250	NC	C	N	HC	0.1229	0.3642	1
4623	105	I	T	410	T	C	ATC	ACC	NonSyn	T410C	TC	9	6	8	0	0.8319058	0.4828588	1.20742	Mosquito	B	8.756502e-06	5.645669e-07	MF.9	4.113426e-05	1133419	NC	C	N	HC	0.1229	0.3642	1
4624	105	I	V	409	A	G	ATC	GTC	NonSyn	A409G	AG	9	3	8	0	0.6545337	0.4713492	1.402733	Human	A	1.14325e-05	8.091075e-07	MF.9	7.868224e-05	1045407	C	C	N	HC	0.1229	0.3642	1
4625	105	I	V	409	A	G	ATC	GTC	NonSyn	A409G	AG	9	3	8	0	1.010833	0.6301139	1.794488	Mosquito	A	1.210803e-05	6.184859e-07	MF.9	9.968528e-05	1109745	C	C	N	HC	0.1229	0.3642	1
4626	105	I	V	409	A	G	ATC	GTC	NonSyn	A409G	AG	9	4	8	0	0.9945833	0.4285639	1.551351	Mosquito	B	1.180995e-05	6.889282e-07	MF.9	1.465701e-05	1141914	C	C	N	HC	0.1229	0.3642	1
4627	106	I	F	412	A	T	ATT	TTT	NonSyn	A412T	AT	9	3	8	0	1.454869	0.6307761	3.326976	Human	A	2.37871e-06	1.833534e-07	MF.9	1.018399e-05	1053428	C	C	N	HC	0.1852	0.3596	1
4628	106	I	F	412	A	T	ATT	TTT	NonSyn	A412T	AT	9	6	8	0	1.012102	0.5445156	1.40191	Mosquito	A	2.875636e-06	1.187371e-07	MF.9	0.0002807412	1117766	C	C	N	HC	0.1852	0.3596	1
4629	106	I	F	412	A	T	ATT	TTT	NonSyn	A412T	AT	9	1	8	0	0.8016094	0.300801	3.005489	Mosquito	B	2.369747e-06	1.784832e-07	MF.9	2.183454e-05	1149935	C	C	N	HC	0.1852	0.3596	1
4630	106	I	I	414	T	A	ATT	ATA	Syn	T414A	TA	9	8	8	0	0.9542809	0.7137105	1.221816	Human	A	3.680327e-06	2.30523e-07	MF.9	3.322999e-05	1029685	S	C	N	HC	0.1852	0.3596	1
4631	106	I	I	414	T	C	ATT	ATC	Syn	T414C	TC	9	9	8	0	1.069286	0.8245227	1.337425	Human	A	8.304354e-06	4.831455e-07	MF.9	0.0001694729	1036915	S	C	N	HC	0.1852	0.3596	1
4632	106	I	I	414	T	A	ATT	ATA	Syn	T414A	TA	9	9	8	0	1.461662	0.7005405	1.817975	Human	B	4.145682e-06	2.689648e-07	MF.9	0.000127716	1061854	S	C	N	HC	0.1852	0.3596	1
4633	106	I	I	414	T	C	ATT	ATC	Syn	T414C	TC	9	9	8	0	1.040111	0.7683585	1.374265	Human	B	8.638697e-06	3.744363e-07	MF.9	0.0004551334	1069084	S	C	N	HC	0.1852	0.3596	1
4634	106	I	I	414	T	A	ATT	ATA	Syn	T414A	TA	9	6	8	0	1.247613	0.5526832	2.023287	Mosquito	A	7.166782e-06	3.393327e-07	MF.9	0.000299623	1094023	S	C	N	HC	0.1852	0.3596	1
4635	106	I	I	414	T	C	ATT	ATC	Syn	T414C	TC	9	6	8	0	1.360442	0.8147223	1.855441	Mosquito	A	1.724887e-05	1.124953e-06	MF.9	0.0002746544	1101253	S	C	N	HC	0.1852	0.3596	1
4636	106	I	I	414	T	A	ATT	ATA	Syn	T414A	TA	9	5	8	0	1.093067	0.428886	1.548508	Mosquito	B	4.312763e-06	3.05777e-07	MF.9	3.514309e-05	1126192	S	C	N	HC	0.1852	0.3596	1
4637	106	I	I	414	T	C	ATT	ATC	Syn	T414C	TC	9	8	8	0	1.030136	0.8167862	1.527382	Mosquito	B	8.756502e-06	5.645669e-07	MF.9	0.0003162878	1133422	S	C	N	HC	0.1852	0.3596	1
4638	106	I	M	414	T	G	ATT	ATG	NonSyn	T414G	TG	1	8	1	7	0	0	0	Mosquito	A	3.486291e-06	1.611304e-07	MF.9	0	1109750	C	C	L	HC	0.1852	0.3596	1
4639	106	I	N	413	T	A	ATT	AAT	NonSyn	T413A	TA	2	7	1	7	0	0	0	Mosquito	B	4.312763e-06	3.05777e-07	MF.9	0	1126191	C	C	L	HC	0.1852	0.3596	1
4640	106	I	T	413	T	C	ATT	ACT	NonSyn	T413C	TC	9	5	8	0	3.145332	0.4424627	5.89219	Human	A	8.304354e-06	4.831455e-07	MF.9	5.754889e-05	1036914	NC	C	N	HC	0.1852	0.3596	1
4641	106	I	T	413	T	C	ATT	ACT	NonSyn	T413C	TC	9	7	8	0	0.6637062	0.4201516	2.529486	Human	B	8.638697e-06	3.744363e-07	MF.9	6.356424e-05	1069083	NC	C	N	HC	0.1852	0.3596	1
4642	106	I	T	413	T	C	ATT	ACT	NonSyn	T413C	TC	9	8	8	0	1.223304	0.7336075	1.649226	Mosquito	A	1.724887e-05	1.124953e-06	MF.9	0.0002946947	1101252	NC	C	N	HC	0.1852	0.3596	1
4643	106	I	T	413	T	C	ATT	ACT	NonSyn	T413C	TC	9	9	8	0	1.029859	0.6122966	1.43396	Mosquito	B	8.756502e-06	5.645669e-07	MF.9	9.330501e-05	1133421	NC	C	N	HC	0.1852	0.3596	1
4644	106	I	V	412	A	G	ATT	GTT	NonSyn	A412G	AG	9	5	8	0	1.319883	0.3551479	3.368986	Human	A	1.14325e-05	8.091075e-07	MF.9	3.73413e-05	1045410	C	C	N	HC	0.1852	0.3596	1
4645	106	I	V	412	A	G	ATT	GTT	NonSyn	A412G	AG	9	4	8	0	1.133234	0.728366	1.750509	Mosquito	A	1.210803e-05	6.184859e-07	MF.9	0.0002573461	1109748	C	C	N	HC	0.1852	0.3596	1
4646	106	I	V	412	A	G	ATT	GTT	NonSyn	A412G	AG	9	6	8	0	0.9777706	0.4399136	1.521769	Mosquito	B	1.180995e-05	6.889282e-07	MF.9	8.733815e-05	1141917	C	C	N	HC	0.1852	0.3596	1
4647	107	M	I	417	G	T	ATG	ATT	NonSyn	G417T	GT	9	4	8	0	0.9852879	0.18213	1.936853	Mosquito	A	2.290083e-05	1.366303e-06	MF.9	9.069397e-05	1117768	C	C	N	HC	0.1162	0.3547	1
4648	107	M	I	417	G	T	ATG	ATT	NonSyn	G417T	GT	9	0	8	0	1.556394	0.1163456	2.78109	Mosquito	B	7.493022e-06	1.393832e-06	MF.9	2.425267e-05	1149937	C	C	N	HC	0.1162	0.3547	1
4649	107	M	K	416	T	A	ATG	AAG	NonSyn	T416A	TA	9	8	8	0	0.822139	0.7419965	1.304144	Human	A	3.680327e-06	2.30523e-07	MF.9	3.197319e-05	1029686	C	C	N	HC	0.1162	0.3547	1
4650	107	M	K	416	T	A	ATG	AAG	NonSyn	T416A	TA	9	8	8	0	1.235698	0.8394544	1.637018	Human	B	4.145682e-06	2.689648e-07	MF.9	0.0001199645	1061855	C	C	N	HC	0.1162	0.3547	1
4651	107	M	K	416	T	A	ATG	AAG	NonSyn	T416A	TA	9	1	8	0	1.231167	0.7318015	1.73579	Mosquito	B	4.312763e-06	3.05777e-07	MF.9	2.058962e-05	1126193	C	C	N	HC	0.1162	0.3547	1
4652	107	M	L	415	A	C	ATG	CTG	NonSyn	A415C	AC	1	8	1	7	0	0	0	Mosquito	A	3.286083e-06	1.701643e-07	MF.9	0	1101254	C	C	L	HC	0.1162	0.3547	1
4653	107	M	R	416	T	G	ATG	AGG	NonSyn	T416G	TG	2	7	1	7	0	0	1.664059	Mosquito	A	3.486291e-06	1.611304e-07	MF.9	0	1109752	C	C	N	HC	0.1162	0.3547	1
4654	107	M	T	416	T	C	ATG	ACG	NonSyn	T416C	TC	9	8	8	0	1.123528	0.371834	1.50756	Human	A	8.304354e-06	4.831455e-07	MF.9	3.836783e-05	1036917	C	C	N	HC	0.1162	0.3547	1
4655	107	M	T	416	T	C	ATG	ACG	NonSyn	T416C	TC	9	6	8	0	0.9374352	0.2774622	1.597408	Human	B	8.638697e-06	3.744363e-07	MF.9	3.110192e-05	1069086	C	C	N	HC	0.1162	0.3547	1
4656	107	M	T	416	T	C	ATG	ACG	NonSyn	T416C	TC	9	5	8	0	1.356614	0.2010669	2.121671	Mosquito	B	8.756502e-06	5.645669e-07	MF.9	4.117924e-05	1133424	C	C	N	HC	0.1162	0.3547	1
4657	107	M	V	415	A	G	ATG	GTG	NonSyn	A415G	AG	9	5	8	0	0.4228867	0.3489221	0.7377854	Human	A	1.14325e-05	8.091075e-07	MF.9	3.845217e-05	1045413	C	C	D	HC	0.1162	0.3547	1
4658	107	M	V	415	A	G	ATG	GTG	NonSyn	A415G	AG	9	6	8	0	0.7623533	0.231125	1.401552	Human	B	1.213945e-05	3.148199e-07	MF.9	3.822037e-05	1077582	C	C	N	HC	0.1162	0.3547	1
4659	108	L	L	420	G	C	CTG	CTC	Syn	G420C	GC	5	4	1	7	2.522492	0	5.044984	Human	A	3.700457e-06	2.674076e-07	MF.9	3.14593e-06	1036920	S	C	N	HC	0.1162	0.3583	1
4660	108	L	L	420	G	T	CTG	CTT	Syn	G420T	GT	9	8	8	0	0.8370064	0.536828	1.126503	Human	A	5.90433e-06	1.997031e-07	MF.9	6.921047e-05	1053432	S	C	N	HC	0.1162	0.3583	1
4661	108	L	L	418	C	T	CTG	TTG	Syn	C418T	CT	9	9	8	0	0.4202155	0.2425836	0.63812	Human	B	0.0002635581	1.843403e-05	MF.9	0.0005619291	1085600	S	C	D	HC	0.1162	0.3583	1
4662	108	L	L	420	G	T	CTG	CTT	Syn	G420T	GT	9	9	8	0	1.310927	0.7184382	1.903415	Human	B	7.052585e-06	4.58263e-07	MF.9	0.0001045231	1085601	S	C	N	HC	0.1162	0.3583	1
4663	108	L	L	418	C	T	CTG	TTG	Syn	C418T	CT	9	9	8	0	0.6647084	0.5465973	0.7638735	Mosquito	A	0.0001578562	6.997471e-06	MF.9	0.0007172315	1117769	S	C	D	HC	0.1162	0.3583	1
4664	108	L	L	420	G	T	CTG	CTT	Syn	G420T	GT	9	5	8	0	1.074793	0.1993315	2.287352	Mosquito	A	2.290083e-05	1.366303e-06	MF.9	8.296752e-05	1117770	S	C	N	HC	0.1162	0.3583	1
4665	108	L	L	420	G	A	CTG	CTA	Syn	G420A	GA	9	2	8	0	1.404508	0.2787593	2.435999	Mosquito	B	6.112924e-06	3.730988e-07	MF.9	0.0001275921	1126197	S	C	N	HC	0.1162	0.3583	1
4666	108	L	L	418	C	T	CTG	TTG	Syn	C418T	CT	9	9	8	0	0.3809964	0.2237255	0.5350551	Mosquito	B	0.0002034795	7.793136e-06	MF.9	0.000354512	1149938	S	C	D	HC	0.1162	0.3583	1
4667	108	L	L	420	G	T	CTG	CTT	Syn	G420T	GT	9	5	8	0	1.217275	0.5194106	1.692604	Mosquito	B	7.493022e-06	1.393832e-06	MF.9	4.700763e-05	1149939	S	C	N	HC	0.1162	0.3583	1
4668	108	L	M	418	C	A	CTG	ATG	NonSyn	C418A	CA	9	3	8	0	1.042032	0.356565	2.200219	Human	B	3.57888e-06	4.588673e-07	MF.9	1.798173e-05	1061857	C	C	N	HC	0.1162	0.3583	1
4669	108	L	M	418	C	A	CTG	ATG	NonSyn	C418A	CA	9	5	8	0	1.692575	0.7039908	3.119808	Mosquito	A	6.508077e-06	1.996644e-07	MF.9	0.0001630072	1094026	C	C	N	HC	0.1162	0.3583	1
4670	108	L	M	418	C	A	CTG	ATG	NonSyn	C418A	CA	9	8	8	0	0.8110431	0.5424548	1.081536	Mosquito	B	4.124727e-06	2.499298e-07	MF.9	3.067892e-05	1126195	C	C	N	HC	0.1162	0.3583	1
4671	108	L	P	419	T	C	CTG	CCG	NonSyn	T419C	TC	6	3	1	7	0.2201282	0	0.4402564	Human	A	8.304354e-06	4.831455e-07	MF.9	0	1036919	C	C	D	HC	0.1162	0.3583	1
4672	108	L	P	419	T	C	CTG	CCG	NonSyn	T419C	TC	4	5	1	7	0	0	0	Human	B	8.638697e-06	3.744363e-07	MF.9	6.524675e-06	1069088	C	C	L	HC	0.1162	0.3583	1
4673	108	L	P	419	T	C	CTG	CCG	NonSyn	T419C	TC	1	8	1	7	0	0	0	Mosquito	B	8.756502e-06	5.645669e-07	MF.9	0	1133426	C	C	L	HC	0.1162	0.3583	1
4674	108	L	R	419	T	G	CTG	CGG	NonSyn	T419G	TG	0	9	0	8	0	0	0	Mosquito	B	2.030327e-06	1.119074e-07	MF.9	0	1141923	C	C	L	HC	0.1162	0.3583	1
4675	108	L	V	418	C	G	CTG	GTG	NonSyn	C418G	CG	1	8	1	7	0	0	0	Human	B	1.455268e-06	7.022105e-08	MF.9	2.247716e-06	1077584	C	C	L	HC	0.1162	0.3583	1
4676	109	I	F	421	A	T	ATT	TTT	NonSyn	A421T	AT	9	2	8	0	1.308369	0.2273808	2.568757	Human	A	2.37871e-06	1.833534e-07	MF.9	9.73296e-06	1053433	C	C	N	HC	0.1162	0.3654	1
4677	109	I	F	421	A	T	ATT	TTT	NonSyn	A421T	AT	9	5	8	0	0.6297074	0.2723494	1.163982	Human	B	2.589251e-06	1.43343e-07	MF.9	1.451433e-05	1085602	C	C	N	HC	0.1162	0.3654	1
4678	109	I	F	421	A	T	ATT	TTT	NonSyn	A421T	AT	9	0	8	0	1.111945	0.1712696	1.781151	Mosquito	B	2.369747e-06	1.784832e-07	MF.9	1.703067e-05	1149940	C	C	N	HC	0.1162	0.3654	1
4679	109	I	I	423	T	C	ATT	ATC	Syn	T423C	TC	9	8	8	0	0.9284751	0.5767703	1.240379	Human	A	8.304354e-06	4.831455e-07	MF.9	0.0001008923	1036923	S	C	N	HC	0.1162	0.3654	1
4680	109	I	I	423	T	C	ATT	ATC	Syn	T423C	TC	9	7	8	0	0.8775804	0.5803582	2.119176	Human	B	8.638697e-06	3.744363e-07	MF.9	4.522298e-05	1069092	S	C	N	HC	0.1162	0.3654	1
4681	109	I	I	423	T	A	ATT	ATA	Syn	T423A	TA	0	9	0	8	0	0	0	Mosquito	A	7.166782e-06	3.393327e-07	MF.9	0	1094030	S	C	L	HC	0.1162	0.3654	1
4682	109	I	I	423	T	C	ATT	ATC	Syn	T423C	TC	9	5	8	0	1.119095	0.9188326	1.51924	Mosquito	A	1.724887e-05	1.124953e-06	MF.9	0.0001291208	1101261	S	C	N	HC	0.1162	0.3654	1
4683	109	I	I	423	T	C	ATT	ATC	Syn	T423C	TC	9	6	8	0	1.091105	0.7232491	1.424315	Mosquito	B	8.756502e-06	5.645669e-07	MF.9	0.0002070026	1133430	S	C	N	HC	0.1162	0.3654	1
4684	109	I	N	422	T	A	ATT	AAT	NonSyn	T422A	TA	2	7	1	7	0	0	0	Mosquito	A	7.166782e-06	3.393327e-07	MF.9	0	1094029	C	C	L	HC	0.1162	0.3654	1
4685	109	I	N	422	T	A	ATT	AAT	NonSyn	T422A	TA	1	8	1	7	0	0	0	Mosquito	B	4.312763e-06	3.05777e-07	MF.9	0	1126198	C	C	L	HC	0.1162	0.3654	1
4686	109	I	S	422	T	G	ATT	AGT	NonSyn	T422G	TG	0	9	0	8	0	0	0	Human	A	1.799189e-06	1.556942e-07	MF.9	0	1045418	NC	C	L	HC	0.1162	0.3654	1
4687	109	I	S	422	T	G	ATT	AGT	NonSyn	T422G	TG	1	8	1	7	0.2043055	0	0.408611	Human	B	1.80746e-06	1.143024e-07	MF.9	0	1077587	NC	C	D	HC	0.1162	0.3654	1
4688	109	I	S	422	T	G	ATT	AGT	NonSyn	T422G	TG	0	9	0	8	0	0	0	Mosquito	A	3.486291e-06	1.611304e-07	MF.9	0	1109756	NC	C	L	HC	0.1162	0.3654	1
4689	109	I	S	422	T	G	ATT	AGT	NonSyn	T422G	TG	0	9	0	8	0	0	0	Mosquito	B	2.030327e-06	1.119074e-07	MF.9	0	1141925	NC	C	L	HC	0.1162	0.3654	1
4690	109	I	T	422	T	C	ATT	ACT	NonSyn	T422C	TC	9	2	8	0	0.7705807	0.5312331	1.094189	Human	A	8.304354e-06	4.831455e-07	MF.9	2.539683e-05	1036922	NC	C	N	HC	0.1162	0.3654	1
4691	109	I	V	421	A	G	ATT	GTT	NonSyn	A421G	AG	8	1	8	0	0.8799018	0.5834181	1.173971	Mosquito	A	1.210803e-05	6.184859e-07	MF.9	2.831498e-05	1109755	C	C	N	HC	0.1162	0.3654	1
4692	110	P	A	424	C	G	CCA	GCA	NonSyn	C424G	CG	1	8	1	7	0	0	0.2711153	Human	A	1.604509e-06	2.564144e-07	MF.9	0	1045420	NC	C	D	HC	0.1137	0.3715	1
4693	110	P	A	424	C	G	CCA	GCA	NonSyn	C424G	CG	1	8	1	7	0	0	2.895244	Mosquito	A	2.20927e-06	9.740866e-08	MF.9	0	1109758	NC	C	N	HC	0.1137	0.3715	1
4694	110	P	A	424	C	G	CCA	GCA	NonSyn	C424G	CG	0	9	0	8	0	0	0	Mosquito	B	1.513275e-06	1.225367e-07	MF.9	0	1141927	NC	C	L	HC	0.1137	0.3715	1
4695	110	P	L	425	C	T	CCA	CTA	NonSyn	C425T	CT	9	9	8	0	0.5730045	0.2994346	0.8873832	Human	A	0.0002554735	2.089311e-05	MF.9	0.0003617833	1053435	C	C	D	HC	0.1137	0.3715	1
4696	110	P	L	425	C	T	CCA	CTA	NonSyn	C425T	CT	9	9	8	0	0.506753	0.2525219	0.677066	Human	B	0.0002635581	1.843403e-05	MF.9	0.000576254	1085604	C	C	D	HC	0.1137	0.3715	1
4697	110	P	L	425	C	T	CCA	CTA	NonSyn	C425T	CT	9	9	8	0	0.7168866	0.6381902	0.8007003	Mosquito	A	0.0001578562	6.997471e-06	MF.9	0.0003568923	1117773	C	C	D	HC	0.1137	0.3715	1
4698	110	P	L	425	C	T	CCA	CTA	NonSyn	C425T	CT	9	9	8	0	0.4012269	0.3435194	0.5776212	Mosquito	B	0.0002034795	7.793136e-06	MF.9	0.0003343012	1149942	C	C	D	HC	0.1137	0.3715	1
4699	110	P	P	426	A	G	CCA	CCG	Syn	A426G	AG	9	4	8	0	1.598067	0.4867904	2.857036	Mosquito	B	1.180995e-05	6.889282e-07	MF.9	0.000798595	1141929	S	C	N	HC	0.1137	0.3715	1
4700	110	P	Q	425	C	A	CCA	CAA	NonSyn	C425A	CA	0	9	0	8	0	0	0	Mosquito	A	6.508077e-06	1.996644e-07	MF.9	0	1094032	C	C	L	HC	0.1137	0.3715	1
4701	110	P	R	425	C	G	CCA	CGA	NonSyn	C425G	CG	2	7	1	7	0	0	0.7554528	Human	A	1.604509e-06	2.564144e-07	MF.9	0	1045421	C	C	D	HC	0.1137	0.3715	1
4702	110	P	R	425	C	G	CCA	CGA	NonSyn	C425G	CG	0	9	0	8	0	0	0	Mosquito	A	2.20927e-06	9.740866e-08	MF.9	0	1109759	C	C	L	HC	0.1137	0.3715	1
4703	110	P	R	425	C	G	CCA	CGA	NonSyn	C425G	CG	1	8	1	7	0	0	0	Mosquito	B	1.513275e-06	1.225367e-07	MF.9	0	1141928	C	C	L	HC	0.1137	0.3715	1
4704	110	P	S	424	C	T	CCA	TCA	NonSyn	C424T	CT	9	9	8	0	0.6086117	0.3513134	0.8659099	Mosquito	A	0.0001578562	6.997471e-06	MF.9	0.0003017403	1117772	C	C	D	HC	0.1137	0.3715	1
4705	110	P	S	424	C	T	CCA	TCA	NonSyn	C424T	CT	9	9	8	0	0.2758012	0.1943154	0.4266923	Mosquito	B	0.0002034795	7.793136e-06	MF.9	0.0004307349	1149941	C	C	D	HC	0.1137	0.3715	1
4706	110	P	T	424	C	A	CCA	ACA	NonSyn	C424A	CA	2	7	1	7	0	0	0	Mosquito	A	6.508077e-06	1.996644e-07	MF.9	6.559571e-06	1094031	NC	C	L	HC	0.1137	0.3715	1
4707	111	T	K	428	C	A	ACA	AAA	NonSyn	C428A	CA	1	8	0	8	0	0	0	Mosquito	A	6.508077e-06	1.996644e-07	MF.9	0	1094033	C	C	L	HC	0.1162	0.3772	1
4708	111	T	T	429	A	G	ACA	ACG	Syn	A429G	AG	9	3	8	0	0.2306311	0.1290665	0.5222296	Human	A	1.14325e-05	8.091075e-07	MF.9	2.491839e-05	1045425	S	C	D	HC	0.1162	0.3772	1
4709	111	T	T	429	A	T	ACA	ACT	Syn	A429T	AT	9	9	8	0	1.005219	0.5193982	1.402401	Human	A	2.37871e-06	1.833534e-07	MF.9	9.032917e-05	1053439	S	C	N	HC	0.1162	0.3772	1
4710	111	T	T	429	A	T	ACA	ACT	Syn	A429T	AT	9	9	8	0	1.307048	0.6027102	1.728821	Human	B	2.589251e-06	1.43343e-07	MF.9	8.504107e-05	1085608	S	C	N	HC	0.1162	0.3772	1
4711	111	T	T	429	A	C	ACA	ACC	Syn	A429C	AC	9	0	8	0	0.75552	0.5264578	0.9398091	Mosquito	B	2.391816e-06	1.394774e-07	MF.9	3.190108e-06	1133433	S	C	D	HC	0.1162	0.3772	1
4712	111	T	T	429	A	G	ACA	ACG	Syn	A429G	AG	9	4	8	0	0.632818	0.1425424	1.151096	Mosquito	B	1.180995e-05	6.889282e-07	MF.9	3.509119e-05	1141932	S	C	N	HC	0.1162	0.3772	1
4713	111	T	T	429	A	T	ACA	ACT	Syn	A429T	AT	9	2	8	0	1.100541	0.6409394	1.382079	Mosquito	B	2.369747e-06	1.784832e-07	MF.9	1.914065e-05	1149946	S	C	N	HC	0.1162	0.3772	1
4714	112	V	A	431	T	C	GTG	GCG	NonSyn	T431C	TC	9	8	8	0	0.8727509	0.6141766	1.046732	Human	A	8.304354e-06	4.831455e-07	MF.9	8.547496e-05	1036928	NC	C	N	HC	0.1162	0.3814	1
4715	112	V	A	431	T	C	GTG	GCG	NonSyn	T431C	TC	9	9	8	0	0.9676525	0.7936216	1.110117	Human	B	8.638697e-06	3.744363e-07	MF.9	0.0001678776	1069097	NC	C	N	HC	0.1162	0.3814	1
4716	112	V	A	431	T	C	GTG	GCG	NonSyn	T431C	TC	9	7	8	0	1.148322	0.8783147	1.418213	Mosquito	A	1.724887e-05	1.124953e-06	MF.9	0.0004257619	1101266	NC	C	N	HC	0.1162	0.3814	1
4717	112	V	A	431	T	C	GTG	GCG	NonSyn	T431C	TC	9	8	8	0	1.154379	0.7572188	1.599814	Mosquito	B	8.756502e-06	5.645669e-07	MF.9	8.518371e-05	1133435	NC	C	N	HC	0.1162	0.3814	1
4718	112	V	E	431	T	A	GTG	GAG	NonSyn	T431A	TA	9	1	8	0	0.701187	0.3356157	1.484067	Human	B	4.145682e-06	2.689648e-07	MF.9	3.581389e-05	1061866	C	C	N	HC	0.1162	0.3814	1
4719	112	V	L	430	G	T	GTG	TTG	NonSyn	G430T	GT	9	9	8	0	0.8057958	0.6811256	0.9717385	Human	A	5.90433e-06	1.997031e-07	MF.9	4.821399e-05	1053440	C	C	D	HC	0.1162	0.3814	1
4720	112	V	L	430	G	T	GTG	TTG	NonSyn	G430T	GT	9	9	8	0	1.085765	0.8022816	1.342525	Human	B	7.052585e-06	4.58263e-07	MF.9	7.725968e-05	1085609	C	C	N	HC	0.1162	0.3814	1
4721	112	V	L	430	G	T	GTG	TTG	NonSyn	G430T	GT	9	6	8	0	1.011406	0.4278245	1.450929	Mosquito	B	7.493022e-06	1.393832e-06	MF.9	6.170213e-05	1149947	C	C	N	HC	0.1162	0.3814	1
4722	112	V	V	432	G	A	GTG	GTA	Syn	G432A	GA	9	3	8	0	0.680865	0.2972467	0.8812366	Human	A	6.69739e-06	4.668841e-07	MF.9	9.985521e-06	1029698	S	C	D	HC	0.1162	0.3814	1
4723	112	V	V	432	G	A	GTG	GTA	Syn	G432A	GA	9	9	8	0	0.8605761	0.6826478	1.547377	Human	B	7.684204e-06	4.645403e-07	MF.9	7.096178e-05	1061867	S	C	N	HC	0.1162	0.3814	1
4724	112	V	V	432	G	A	GTG	GTA	Syn	G432A	GA	8	3	8	0	0.9820763	0.1755672	1.826161	Mosquito	A	8.774931e-06	2.38219e-07	MF.9	5.880089e-05	1094036	S	C	N	HC	0.1162	0.3814	1
4725	112	V	V	432	G	A	GTG	GTA	Syn	G432A	GA	9	6	8	0	1.209051	0.4124796	1.61411	Mosquito	B	6.112924e-06	3.730988e-07	MF.9	1.980244e-05	1126205	S	C	N	HC	0.1162	0.3814	1
4726	113	M	I	435	G	C	ATG	ATC	NonSyn	G435C	GC	9	7	8	0	0.8063998	0.6230302	1.005795	Human	A	3.700457e-06	2.674076e-07	MF.9	6.786102e-06	1036932	C	C	N	HC	0.1449	0.3855	1
4727	113	M	I	435	G	A	ATG	ATA	NonSyn	G435A	GA	9	5	8	0	0.8965672	0.7695894	1.060893	Human	B	7.684204e-06	4.645403e-07	MF.9	2.086163e-05	1061869	C	C	N	HC	0.1449	0.3855	1
4728	113	M	I	435	G	A	ATG	ATA	NonSyn	G435A	GA	9	0	8	0	0.6227773	0.215009	1.15511	Mosquito	A	8.774931e-06	2.38219e-07	MF.9	2.602378e-05	1094038	C	C	N	HC	0.1449	0.3855	1
4729	113	M	I	435	G	A	ATG	ATA	NonSyn	G435A	GA	9	7	8	0	1.956465	1.10266	3.871503	Mosquito	B	6.112924e-06	3.730988e-07	MF.9	0.0002305513	1126207	C	C	B	HC	0.1449	0.3855	1
4730	113	M	K	434	T	A	ATG	AAG	NonSyn	T434A	TA	9	6	8	0	0.9266578	0.7923827	1.095632	Human	A	3.680327e-06	2.30523e-07	MF.9	2.330071e-05	1029699	C	C	N	HC	0.1449	0.3855	1
4731	113	M	K	434	T	A	ATG	AAG	NonSyn	T434A	TA	9	8	8	0	1.436859	0.8137428	1.807878	Human	B	4.145682e-06	2.689648e-07	MF.9	6.902095e-05	1061868	C	C	N	HC	0.1449	0.3855	1
4732	113	M	K	434	T	A	ATG	AAG	NonSyn	T434A	TA	9	1	8	0	1.202693	0.1991977	2.078583	Mosquito	A	7.166782e-06	3.393327e-07	MF.9	6.169412e-05	1094037	C	C	N	HC	0.1449	0.3855	1
4733	113	M	K	434	T	A	ATG	AAG	NonSyn	T434A	TA	9	1	8	0	1.349924	0.4340849	1.954741	Mosquito	B	4.312763e-06	3.05777e-07	MF.9	1.663296e-05	1126206	C	C	N	HC	0.1449	0.3855	1
4734	113	M	L	433	A	T	ATG	TTG	NonSyn	A433T	AT	9	7	8	0	0.8215509	0.528688	1.220296	Human	A	2.37871e-06	1.833534e-07	MF.9	3.637602e-05	1053442	C	C	N	HC	0.1449	0.3855	1
4735	113	M	L	433	A	T	ATG	TTG	NonSyn	A433T	AT	9	8	8	0	1.164396	0.6970967	1.673683	Human	B	2.589251e-06	1.43343e-07	MF.9	7.406875e-05	1085611	C	C	N	HC	0.1449	0.3855	1
4736	113	M	L	433	A	C	ATG	CTG	NonSyn	A433C	AC	9	0	8	0	1.826298	0.6316511	2.798247	Mosquito	A	3.286083e-06	1.701643e-07	MF.9	5.252625e-06	1101268	C	C	N	HC	0.1449	0.3855	1
4737	113	M	R	434	T	G	ATG	AGG	NonSyn	T434G	TG	1	8	1	7	0	0	1.344318	Mosquito	A	3.486291e-06	1.611304e-07	MF.9	0	1109766	C	C	N	HC	0.1449	0.3855	1
4738	113	M	R	434	T	G	ATG	AGG	NonSyn	T434G	TG	2	7	1	7	0.2435909	0	0.6089771	Mosquito	B	2.030327e-06	1.119074e-07	MF.9	0	1141935	C	C	D	HC	0.1449	0.3855	1
4739	113	M	T	434	T	C	ATG	ACG	NonSyn	T434C	TC	9	9	8	0	1.418052	1.177692	1.673274	Human	A	8.304354e-06	4.831455e-07	MF.9	0.0001098462	1036931	C	C	B	HC	0.1449	0.3855	1
4740	113	M	T	434	T	C	ATG	ACG	NonSyn	T434C	TC	9	8	8	0	1.125946	0.7463492	1.631456	Mosquito	A	1.724887e-05	1.124953e-06	MF.9	0.0001028235	1101269	C	C	N	HC	0.1449	0.3855	1
4741	113	M	T	434	T	C	ATG	ACG	NonSyn	T434C	TC	9	9	8	0	1.030569	0.6493625	1.371963	Mosquito	B	8.756502e-06	5.645669e-07	MF.9	5.655205e-05	1133438	C	C	N	HC	0.1449	0.3855	1
4742	113	M	V	433	A	G	ATG	GTG	NonSyn	A433G	AG	9	6	8	0	0.4235969	0.2580766	0.8028523	Human	A	1.14325e-05	8.091075e-07	MF.9	2.645529e-05	1045427	C	C	D	HC	0.1449	0.3855	1
4743	113	M	V	433	A	G	ATG	GTG	NonSyn	A433G	AG	9	3	8	0	0.8985108	0.4284652	1.111213	Mosquito	A	1.210803e-05	6.184859e-07	MF.9	9.454725e-05	1109765	C	C	N	HC	0.1449	0.3855	1
4744	113	M	V	433	A	G	ATG	GTG	NonSyn	A433G	AG	9	6	8	0	1.123378	0.7385868	1.599126	Mosquito	B	1.180995e-05	6.889282e-07	MF.9	0.0001088599	1141934	C	C	N	HC	0.1449	0.3855	1
4745	114	A	A	438	G	A	GCG	GCA	Syn	G438A	GA	9	6	8	0	0.9838624	0.4852959	2.111735	Human	A	6.69739e-06	4.668841e-07	MF.9	2.039665e-05	1029703	S	C	N	HC	0.1671	0.3941	1
4746	114	A	A	438	G	T	GCG	GCT	Syn	G438T	GT	9	8	8	0	1.997349	0.6161481	3.792205	Human	A	5.90433e-06	1.997031e-07	MF.9	0.0001427765	1053446	S	C	N	HC	0.1671	0.3941	1
4747	114	A	A	438	G	A	GCG	GCA	Syn	G438A	GA	9	7	8	0	1.465977	0.627104	2.218519	Human	B	7.684204e-06	4.645403e-07	MF.9	7.645673e-05	1061872	S	C	N	HC	0.1671	0.3941	1
4748	114	A	A	438	G	T	GCG	GCT	Syn	G438T	GT	9	8	8	0	1.260527	0.5032185	1.779779	Human	B	7.052585e-06	4.58263e-07	MF.9	6.521309e-05	1085615	S	C	N	HC	0.1671	0.3941	1
4749	114	A	A	438	G	A	GCG	GCA	Syn	G438A	GA	8	3	8	0	0.8324802	0.4760228	1.066106	Mosquito	A	8.774931e-06	2.38219e-07	MF.9	0.0002180826	1094041	S	C	N	HC	0.1671	0.3941	1
4750	114	A	A	438	G	C	GCG	GCC	Syn	G438C	GC	9	4	8	0	1.334529	0.2548773	2.414182	Mosquito	A	1.263716e-05	7.038203e-07	MF.9	6.086026e-05	1101272	S	C	N	HC	0.1671	0.3941	1
4751	114	A	A	438	G	A	GCG	GCA	Syn	G438A	GA	9	5	8	0	1.079199	0.7471492	1.701705	Mosquito	B	6.112924e-06	3.730988e-07	MF.9	4.282472e-05	1126210	S	C	N	HC	0.1671	0.3941	1
4752	114	A	G	437	C	G	GCG	GGG	NonSyn	C437G	CG	1	8	1	7	0	0	2.210066	Mosquito	A	2.20927e-06	9.740866e-08	MF.9	0	1109767	C	C	N	HC	0.1671	0.3941	1
4753	114	A	P	436	G	C	GCG	CCG	NonSyn	G436C	GC	3	6	0	8	0	0	0	Mosquito	A	1.263716e-05	7.038203e-07	MF.9	1.062186e-05	1101271	NC	C	L	HC	0.1671	0.3941	1
4754	114	A	P	436	G	C	GCG	CCG	NonSyn	G436C	GC	1	8	1	7	0	0	0	Mosquito	B	3.432927e-06	9.570197e-07	MF.9	0	1133440	NC	C	L	HC	0.1671	0.3941	1
4755	114	A	T	436	G	A	GCG	ACG	NonSyn	G436A	GA	9	4	8	0	1.292843	0.7670553	1.794973	Human	B	7.684204e-06	4.645403e-07	MF.9	1.671989e-05	1061870	C	C	N	HC	0.1671	0.3941	1
4756	114	A	V	437	C	T	GCG	GTG	NonSyn	C437T	CT	9	9	8	0	0.4170309	0.2509338	0.6608695	Human	B	0.0002635581	1.843403e-05	MF.9	0.0006754423	1085614	NC	C	D	HC	0.1671	0.3941	1
4757	114	A	V	437	C	T	GCG	GTG	NonSyn	C437T	CT	9	9	8	0	0.5145609	0.4128721	0.6043511	Mosquito	B	0.0002034795	7.793136e-06	MF.9	0.0003725088	1149952	NC	C	D	HC	0.1671	0.3941	1
4758	115	F	C	440	T	G	TTC	TGC	NonSyn	T440G	TG	9	9	8	0	4.205627	0.8606396	7.658973	Human	A	1.799189e-06	1.556942e-07	MF.9	0.0003110909	1045431	NC	pr	N	HC	0.1942	0.4025	1
4759	115	F	C	440	T	G	TTC	TGC	NonSyn	T440G	TG	9	9	8	0	1.000452	0.563669	2.767934	Human	B	1.80746e-06	1.143024e-07	MF.9	0.0006552843	1077600	NC	pr	N	HC	0.1942	0.4025	1
4760	115	F	C	440	T	G	TTC	TGC	NonSyn	T440G	TG	9	9	8	0	2.341816	0.4073401	8.041233	Mosquito	A	3.486291e-06	1.611304e-07	MF.9	0.000138731	1109769	NC	pr	N	HC	0.1942	0.4025	1
4761	115	F	C	440	T	G	TTC	TGC	NonSyn	T440G	TG	9	9	8	0	1.26716	0.8794714	1.469248	Mosquito	B	2.030327e-06	1.119074e-07	MF.9	0.0005557938	1141938	NC	pr	N	HC	0.1942	0.4025	1
4762	115	F	L	441	C	A	TTC	TTA	NonSyn	C441A	CA	9	9	8	0	3.222521	0.9056935	5.727274	Human	A	2.985888e-06	1.847504e-07	MF.9	0.0002308148	1029706	C	pr	N	HC	0.1942	0.4025	1
4763	115	F	L	441	C	G	TTC	TTG	NonSyn	C441G	CG	2	7	1	7	0	0	1.84948	Human	A	1.604509e-06	2.564144e-07	MF.9	0	1045432	C	pr	N	HC	0.1942	0.4025	1
4764	115	F	L	441	C	A	TTC	TTA	NonSyn	C441A	CA	9	9	8	0	0.844268	0.3115247	4.209017	Human	B	3.57888e-06	4.588673e-07	MF.9	0.0004855332	1061875	C	pr	N	HC	0.1942	0.4025	1
4765	115	F	L	441	C	A	TTC	TTA	NonSyn	C441A	CA	9	9	8	0	2.043972	0.2942466	10.98877	Mosquito	A	6.508077e-06	1.996644e-07	MF.9	8.044769e-05	1094044	C	pr	N	HC	0.1942	0.4025	1
4766	115	F	L	441	C	G	TTC	TTG	NonSyn	C441G	CG	1	8	1	7	0	0	2.21804	Mosquito	A	2.20927e-06	9.740866e-08	MF.9	0	1109770	C	pr	N	HC	0.1942	0.4025	1
4767	115	F	L	441	C	A	TTC	TTA	NonSyn	C441A	CA	9	9	8	0	1.309777	0.9499055	1.603001	Mosquito	B	4.124727e-06	2.499298e-07	MF.9	0.0004213668	1126213	C	pr	N	HC	0.1942	0.4025	1
4768	115	F	L	441	C	G	TTC	TTG	NonSyn	C441G	CG	1	8	1	7	0.3774801	0	0.9437003	Mosquito	B	1.513275e-06	1.225367e-07	MF.9	0	1141939	C	pr	D	HC	0.1942	0.4025	1
4769	115	F	S	440	T	C	TTC	TCC	NonSyn	T440C	TC	9	1	8	0	1.115216	0.1669577	2.298808	Mosquito	B	8.756502e-06	5.645669e-07	MF.9	2.401578e-05	1133443	NC	pr	N	HC	0.1942	0.4025	1
4770	115	F	V	439	T	G	TTC	GTC	NonSyn	T439G	TG	0	9	0	8	0	0	0	Human	B	1.80746e-06	1.143024e-07	MF.9	0	1077599	NC	pr	L	HC	0.1942	0.4025	1
4771	116	H	H	444	T	C	CAT	CAC	Syn	T444C	TC	9	9	8	0	1.436537	1.059538	1.985227	Human	A	8.304354e-06	4.831455e-07	MF.9	0.0003209929	1036938	S	pr	B	HC	0.2328	0.4123	1
4772	116	H	H	444	T	C	CAT	CAC	Syn	T444C	TC	9	9	8	0	1.050511	0.8164634	1.18176	Human	B	8.638697e-06	3.744363e-07	MF.9	4.502612e-05	1069107	S	pr	N	HC	0.2328	0.4123	1
4773	116	H	H	444	T	C	CAT	CAC	Syn	T444C	TC	9	7	8	0	1.473558	0.5707233	1.927369	Mosquito	A	1.724887e-05	1.124953e-06	MF.9	9.659214e-05	1101276	S	pr	N	HC	0.2328	0.4123	1
4774	116	H	H	444	T	C	CAT	CAC	Syn	T444C	TC	9	9	8	0	0.9473471	0.6118925	1.081968	Mosquito	B	8.756502e-06	5.645669e-07	MF.9	0.0001063415	1133445	S	pr	N	HC	0.2328	0.4123	1
4775	116	H	N	442	C	A	CAT	AAT	NonSyn	C442A	CA	9	4	8	0	3.483574	0.9788317	6.128527	Human	A	2.985888e-06	1.847504e-07	MF.9	0.0001261234	1029707	C	pr	N	HC	0.2328	0.4123	1
4776	116	H	N	442	C	A	CAT	AAT	NonSyn	C442A	CA	9	7	8	0	1.569777	0.2490806	10.89055	Mosquito	A	6.508077e-06	1.996644e-07	MF.9	6.698084e-05	1094045	C	pr	N	HC	0.2328	0.4123	1
4777	116	H	N	442	C	A	CAT	AAT	NonSyn	C442A	CA	9	8	8	0	2.42224	0.6733077	3.49438	Mosquito	B	4.124727e-06	2.499298e-07	MF.9	0.0002649096	1126214	C	pr	N	HC	0.2328	0.4123	1
4778	116	H	P	443	A	C	CAT	CCT	NonSyn	A443C	AC	9	6	8	0	1.265019	0.9345183	1.616322	Human	A	2.326514e-06	2.040447e-07	MF.9	3.152913e-05	1036937	NS	pr	N	HC	0.2328	0.4123	1
4779	116	H	P	443	A	C	CAT	CCT	NonSyn	A443C	AC	9	6	8	0	1.08453	0.5313618	4.437526	Human	B	2.288044e-06	1.737362e-07	MF.9	6.568428e-05	1069106	NS	pr	N	HC	0.2328	0.4123	1
4780	116	H	P	443	A	C	CAT	CCT	NonSyn	A443C	AC	9	3	8	0	2.755262	0.36577	7.534245	Mosquito	A	3.286083e-06	1.701643e-07	MF.9	3.173322e-05	1101275	NS	pr	N	HC	0.2328	0.4123	1
4781	116	H	Q	444	T	G	CAT	CAG	NonSyn	T444G	TG	9	1	8	0	0.6257746	0.3191975	1.056671	Human	A	1.799189e-06	1.556942e-07	MF.9	3.14699e-06	1045435	NS	pr	N	HC	0.2328	0.4123	1
4782	116	H	Q	444	T	A	CAT	CAA	NonSyn	T444A	TA	9	4	8	0	1.229129	0.8482427	1.607668	Human	B	4.145682e-06	2.689648e-07	MF.9	4.073791e-05	1061877	NS	pr	N	HC	0.2328	0.4123	1
4783	116	H	Q	444	T	A	CAT	CAA	NonSyn	T444A	TA	9	4	8	0	1.396424	0.7433143	1.9326	Mosquito	B	4.312763e-06	3.05777e-07	MF.9	8.566398e-05	1126215	NS	pr	N	HC	0.2328	0.4123	1
4784	116	H	R	443	A	G	CAT	CGT	NonSyn	A443G	AG	9	9	8	0	0.6259804	0.3084948	1.397987	Human	A	1.14325e-05	8.091075e-07	MF.9	4.098787e-05	1045434	C	pr	N	HC	0.2328	0.4123	1
4785	116	H	R	443	A	G	CAT	CGT	NonSyn	A443G	AG	9	9	8	0	0.9167393	0.8301856	1.003293	Human	B	1.213945e-05	3.148199e-07	MF.9	0.0001724212	1077603	C	pr	N	HC	0.2328	0.4123	1
4786	116	H	R	443	A	G	CAT	CGT	NonSyn	A443G	AG	8	1	1	7	0	0	0.470679	Mosquito	A	1.210803e-05	6.184859e-07	MF.9	4.533318e-06	1109772	C	pr	D	HC	0.2328	0.4123	1
4787	116	H	Y	442	C	T	CAT	TAT	NonSyn	C442T	CT	9	9	8	0	0.4969492	0.2634767	0.602592	Mosquito	A	0.0001578562	6.997471e-06	MF.9	0.0002583547	1117786	C	pr	D	HC	0.2328	0.4123	1
4788	116	H	Y	442	C	T	CAT	TAT	NonSyn	C442T	CT	9	9	8	0	0.541064	0.3856691	0.7165658	Mosquito	B	0.0002034795	7.793136e-06	MF.9	0.0003727217	1149955	C	pr	D	HC	0.2328	0.4123	1
4789	117	L	F	447	A	T	TTA	TTT	NonSyn	A447T	AT	4	5	1	7	0.002710294	0	0.006775736	Human	B	2.589251e-06	1.43343e-07	MF.9	1.892739e-06	1085619	C	pr	D	HC	0.2292	0.4266	1
4790	117	L	I	445	T	A	TTA	ATA	NonSyn	T445A	TA	8	4	8	0	1.023111	0.2122279	2.016021	Mosquito	B	4.312763e-06	3.05777e-07	MF.9	4.258134e-05	1126216	C	pr	N	HC	0.2292	0.4266	1
4791	117	L	L	445	T	C	TTA	CTA	Syn	T445C	TC	9	9	8	0	0.9571054	0.7149279	2.497192	Human	A	8.304354e-06	4.831455e-07	MF.9	0.0002339959	1036939	S	pr	N	HC	0.2292	0.4266	1
4792	117	L	L	447	A	G	TTA	TTG	Syn	A447G	AG	9	8	8	0	0.9713065	0.5664004	1.267305	Human	A	1.14325e-05	8.091075e-07	MF.9	7.665705e-05	1045438	S	pr	N	HC	0.2292	0.4266	1
4793	117	L	L	445	T	C	TTA	CTA	Syn	T445C	TC	9	8	8	0	1.056482	0.6993479	1.413617	Human	B	8.638697e-06	3.744363e-07	MF.9	4.660237e-05	1069108	S	pr	N	HC	0.2292	0.4266	1
4794	117	L	L	447	A	G	TTA	TTG	Syn	A447G	AG	9	9	8	0	0.9263221	0.8138016	1.115476	Human	B	1.213945e-05	3.148199e-07	MF.9	7.192406e-05	1077607	S	pr	N	HC	0.2292	0.4266	1
4795	117	L	L	445	T	C	TTA	CTA	Syn	T445C	TC	9	8	8	0	1.061408	0.5900329	1.524172	Mosquito	A	1.724887e-05	1.124953e-06	MF.9	0.0001659089	1101277	S	pr	N	HC	0.2292	0.4266	1
4796	117	L	L	447	A	G	TTA	TTG	Syn	A447G	AG	9	8	8	0	1.961829	0.6472269	2.793362	Mosquito	A	1.210803e-05	6.184859e-07	MF.9	0.0003329489	1109776	S	pr	N	HC	0.2292	0.4266	1
4797	117	L	L	445	T	C	TTA	CTA	Syn	T445C	TC	9	9	8	0	1.395345	0.7723086	2.345951	Mosquito	B	8.756502e-06	5.645669e-07	MF.9	0.0002299392	1133446	S	pr	N	HC	0.2292	0.4266	1
4798	117	L	L	447	A	G	TTA	TTG	Syn	A447G	AG	9	8	8	0	1.129297	0.6591264	1.379266	Mosquito	B	1.180995e-05	6.889282e-07	MF.9	0.0004105833	1141945	S	pr	N	HC	0.2292	0.4266	1
4799	117	L	S	446	T	C	TTA	TCA	NonSyn	T446C	TC	9	6	8	0	1.053602	0.3989191	1.618629	Human	A	8.304354e-06	4.831455e-07	MF.9	3.592244e-05	1036940	NC	pr	N	HC	0.2292	0.4266	1
4800	117	L	S	446	T	C	TTA	TCA	NonSyn	T446C	TC	9	4	8	0	1.347868	0.4409494	2.055443	Human	B	8.638697e-06	3.744363e-07	MF.9	4.412098e-05	1069109	NC	pr	N	HC	0.2292	0.4266	1
4801	117	L	S	446	T	C	TTA	TCA	NonSyn	T446C	TC	9	4	8	0	0.6874863	0.31225	1.002235	Mosquito	A	1.724887e-05	1.124953e-06	MF.9	3.765864e-05	1101278	NC	pr	N	HC	0.2292	0.4266	1
4802	117	L	S	446	T	C	TTA	TCA	NonSyn	T446C	TC	9	5	8	0	0.9212819	0.8695283	1.321486	Mosquito	B	8.756502e-06	5.645669e-07	MF.9	2.732218e-05	1133447	NC	pr	N	HC	0.2292	0.4266	1
4803	117	L	V	445	T	G	TTA	GTA	NonSyn	T445G	TG	9	1	8	0	0.8145031	0.3760576	1.181132	Human	A	1.799189e-06	1.556942e-07	MF.9	1.539447e-05	1045436	C	pr	N	HC	0.2292	0.4266	1
4804	117	L	V	445	T	G	TTA	GTA	NonSyn	T445G	TG	9	3	8	0	1.364748	0.5221127	1.787392	Human	B	1.80746e-06	1.143024e-07	MF.9	4.236579e-05	1077605	C	pr	N	HC	0.2292	0.4266	1
4805	117	L	V	445	T	G	TTA	GTA	NonSyn	T445G	TG	9	1	8	0	1.52995	0.5183121	2.599	Mosquito	B	2.030327e-06	1.119074e-07	MF.9	1.703253e-05	1141943	C	pr	N	HC	0.2292	0.4266	1
4806	117	L	X	446	T	G	TTA	TGA	NonSyn	T446G	TG	9	4	8	0	0.9580931	0.2814949	2.053757	Human	A	1.799189e-06	1.556942e-07	MF.9	2.993537e-06	1045437	X	pr	N	HC	0.2292	0.4266	1
4807	117	L	X	446	T	A	TTA	TAA	NonSyn	T446A	TA	9	6	8	0	1.64644	0.6696888	3.576703	Human	B	4.145682e-06	2.689648e-07	MF.9	3.609898e-05	1061879	X	pr	N	HC	0.2292	0.4266	1
4808	117	L	X	446	T	G	TTA	TGA	NonSyn	T446G	TG	9	2	8	0	1.888205	0.672106	3.11944	Human	B	1.80746e-06	1.143024e-07	MF.9	2.406599e-05	1077606	X	pr	N	HC	0.2292	0.4266	1
4809	117	L	X	446	T	A	TTA	TAA	NonSyn	T446A	TA	4	5	1	7	0	0	0.1640509	Mosquito	A	7.166782e-06	3.393327e-07	MF.9	4.184293e-06	1094048	X	pr	D	HC	0.2292	0.4266	1
4810	118	T	A	448	A	G	ACC	GCC	NonSyn	A448G	AG	6	3	0	8	0	0	0	Human	A	1.14325e-05	8.091075e-07	MF.9	0	1045439	C	pr	L	HC	0.2034	0.4273	1
4811	118	T	N	449	C	A	ACC	AAC	NonSyn	C449A	CA	3	6	1	7	0	0	0.6050408	Mosquito	A	6.508077e-06	1.996644e-07	MF.9	0	1094049	C	pr	D	HC	0.2034	0.4273	1
4812	118	T	N	449	C	A	ACC	AAC	NonSyn	C449A	CA	3	6	1	7	0	0	0	Mosquito	B	4.124727e-06	2.499298e-07	MF.9	2.648607e-06	1126218	C	pr	L	HC	0.2034	0.4273	1
4813	118	T	S	449	C	G	ACC	AGC	NonSyn	C449G	CG	1	8	1	7	0	0	0	Human	A	1.604509e-06	2.564144e-07	MF.9	0	1045440	C	pr	L	HC	0.2034	0.4273	1
4814	118	T	S	449	C	G	ACC	AGC	NonSyn	C449G	CG	0	9	0	8	0	0	0	Human	B	1.455268e-06	7.022105e-08	MF.9	0	1077609	C	pr	L	HC	0.2034	0.4273	1
4815	118	T	S	449	C	G	ACC	AGC	NonSyn	C449G	CG	1	8	1	7	0	0	1.483241	Mosquito	A	2.20927e-06	9.740866e-08	MF.9	0	1109778	C	pr	N	HC	0.2034	0.4273	1
4816	118	T	S	449	C	G	ACC	AGC	NonSyn	C449G	CG	0	9	0	8	0	0	0	Mosquito	B	1.513275e-06	1.225367e-07	MF.9	0	1141947	C	pr	L	HC	0.2034	0.4273	1
4817	118	T	T	450	C	A	ACC	ACA	Syn	C450A	CA	9	2	8	0	1.028247	0.6802709	2.247357	Human	A	2.985888e-06	1.847504e-07	MF.9	2.396056e-05	1029712	S	pr	N	HC	0.2034	0.4273	1
4818	118	T	T	450	C	A	ACC	ACA	Syn	C450A	CA	9	1	8	0	0.8520828	0.3843967	1.158175	Human	B	3.57888e-06	4.588673e-07	MF.9	6.049351e-06	1061881	S	pr	N	HC	0.2034	0.4273	1
4819	118	T	T	450	C	G	ACC	ACG	Syn	C450G	CG	2	7	1	7	0	0	1.383668	Human	B	1.455268e-06	7.022105e-08	MF.9	0	1077610	S	pr	N	HC	0.2034	0.4273	1
4820	118	T	T	450	C	A	ACC	ACA	Syn	C450A	CA	9	8	8	0	0.9285689	0.6901377	1.129611	Mosquito	A	6.508077e-06	1.996644e-07	MF.9	0.0001771561	1094050	S	pr	N	HC	0.2034	0.4273	1
4821	118	T	T	450	C	T	ACC	ACT	Syn	C450T	CT	9	9	8	0	0.4627804	0.3373021	0.7248728	Mosquito	A	0.0001578562	6.997471e-06	MF.9	0.0002079659	1117791	S	pr	D	HC	0.2034	0.4273	1
4822	118	T	T	450	C	A	ACC	ACA	Syn	C450A	CA	9	3	8	0	1.024504	0.2637195	3.792879	Mosquito	B	4.124727e-06	2.499298e-07	MF.9	0.0006658379	1126219	S	pr	N	HC	0.2034	0.4273	1
4823	118	T	T	450	C	G	ACC	ACG	Syn	C450G	CG	1	8	1	7	0	0	0.4529778	Mosquito	B	1.513275e-06	1.225367e-07	MF.9	0	1141948	S	pr	D	HC	0.2034	0.4273	1
4824	118	T	T	450	C	T	ACC	ACT	Syn	C450T	CT	9	9	8	0	0.5075325	0.4485884	0.6188513	Mosquito	B	0.0002034795	7.793136e-06	MF.9	0.0003033858	1149960	S	pr	D	HC	0.2034	0.4273	1
4825	119	T	A	451	A	G	ACA	GCA	NonSyn	A451G	AG	9	3	8	0	0.794988	0.348913	1.204895	Mosquito	B	1.180995e-05	6.889282e-07	MF.9	5.186849e-05	1141949	C	pr	N	HC	0.2783	0.4178	1
4826	119	T	I	452	C	T	ACA	ATA	NonSyn	C452T	CT	9	9	8	0	0.552989	0.2294111	0.9511403	Human	A	0.0002554735	2.089311e-05	MF.9	0.0003320014	1053455	NC	pr	D	HC	0.2783	0.4178	1
4827	119	T	I	452	C	T	ACA	ATA	NonSyn	C452T	CT	9	9	8	0	0.6453515	0.4820895	0.7832838	Human	B	0.0002635581	1.843403e-05	MF.9	0.0006143197	1085624	NC	pr	D	HC	0.2783	0.4178	1
4828	119	T	I	452	C	T	ACA	ATA	NonSyn	C452T	CT	9	9	8	0	0.5308555	0.3588315	0.7669971	Mosquito	A	0.0001578562	6.997471e-06	MF.9	0.0002321485	1117793	NC	pr	D	HC	0.2783	0.4178	1
4829	119	T	I	452	C	T	ACA	ATA	NonSyn	C452T	CT	9	9	8	0	0.460959	0.419874	0.5026594	Mosquito	B	0.0002034795	7.793136e-06	MF.9	0.0004119704	1149962	NC	pr	D	HC	0.2783	0.4178	1
4830	119	T	K	452	C	A	ACA	AAA	NonSyn	C452A	CA	2	7	1	7	0	0	0	Human	A	2.985888e-06	1.847504e-07	MF.9	0	1029713	C	pr	L	HC	0.2783	0.4178	1
4831	119	T	P	451	A	C	ACA	CCA	NonSyn	A451C	AC	9	9	8	0	1.075764	0.6062092	1.54879	Human	A	2.326514e-06	2.040447e-07	MF.9	4.258918e-05	1036943	NC	pr	N	HC	0.2783	0.4178	1
4832	119	T	P	451	A	C	ACA	CCA	NonSyn	A451C	AC	9	9	8	0	1.23503	0.780394	2.026621	Human	B	2.288044e-06	1.737362e-07	MF.9	0.0001299039	1069112	NC	pr	N	HC	0.2783	0.4178	1
4833	119	T	P	451	A	C	ACA	CCA	NonSyn	A451C	AC	9	5	8	0	1.354403	0.5268864	2.132318	Mosquito	B	2.391816e-06	1.394774e-07	MF.9	1.910945e-05	1133450	NC	pr	N	HC	0.2783	0.4178	1
4834	119	T	R	452	C	G	ACA	AGA	NonSyn	C452G	CG	2	7	1	7	0	0	1.20659	Human	A	1.604509e-06	2.564144e-07	MF.9	0	1045443	C	pr	N	HC	0.2783	0.4178	1
4835	119	T	R	452	C	G	ACA	AGA	NonSyn	C452G	CG	2	7	1	7	0	0	0	Human	B	1.455268e-06	7.022105e-08	MF.9	1.937917e-06	1077612	C	pr	L	HC	0.2783	0.4178	1
4836	119	T	R	452	C	G	ACA	AGA	NonSyn	C452G	CG	1	8	1	7	0	0	0	Mosquito	B	1.513275e-06	1.225367e-07	MF.9	0	1141950	C	pr	L	HC	0.2783	0.4178	1
4837	119	T	S	451	A	T	ACA	TCA	NonSyn	A451T	AT	9	7	8	0	1.077251	0.5986417	1.456644	Human	A	2.37871e-06	1.833534e-07	MF.9	2.737876e-05	1053454	C	pr	N	HC	0.2783	0.4178	1
4838	119	T	S	451	A	T	ACA	TCA	NonSyn	A451T	AT	9	2	8	0	1.296757	0.4023213	2.572477	Human	B	2.589251e-06	1.43343e-07	MF.9	1.670193e-05	1085623	C	pr	N	HC	0.2783	0.4178	1
4839	119	T	S	451	A	T	ACA	TCA	NonSyn	A451T	AT	9	4	8	0	1.446935	0.4404647	2.704719	Mosquito	B	2.369747e-06	1.784832e-07	MF.9	4.913857e-05	1149961	C	pr	N	HC	0.2783	0.4178	1
4840	119	T	T	453	A	C	ACA	ACC	Syn	A453C	AC	9	7	8	0	0.7248402	0.4915402	1.112913	Human	B	2.288044e-06	1.737362e-07	MF.9	3.673277e-06	1069113	S	pr	N	HC	0.2783	0.4178	1
4841	119	T	T	453	A	G	ACA	ACG	Syn	A453G	AG	9	5	8	0	0.776306	0.4230586	0.9818198	Mosquito	A	1.210803e-05	6.184859e-07	MF.9	9.123287e-05	1109782	S	pr	D	HC	0.2783	0.4178	1
4842	119	T	T	453	A	G	ACA	ACG	Syn	A453G	AG	9	8	8	0	1.085327	0.7026053	1.519943	Mosquito	B	1.180995e-05	6.889282e-07	MF.9	5.725487e-05	1141951	S	pr	N	HC	0.2783	0.4178	1
4843	120	R	G	454	C	G	CGT	GGT	NonSyn	C454G	CG	1	8	1	7	0.3385013	0	0.6770027	Mosquito	A	2.20927e-06	9.740866e-08	MF.9	0	1109783	C	pr	D	HC	0.3599	0.4108	0
4844	120	R	H	455	G	A	CGT	CAT	NonSyn	G455A	GA	9	1	8	0	0.8263928	0.4107578	1.557692	Mosquito	B	6.112924e-06	3.730988e-07	MF.9	0.0001062479	1126222	C	pr	N	HC	0.3599	0.4108	0
4845	120	R	L	455	G	T	CGT	CTT	NonSyn	G455T	GT	9	1	8	0	0.8897316	0.3558305	1.457126	Human	A	5.90433e-06	1.997031e-07	MF.9	5.431535e-05	1053458	C	pr	N	HC	0.3599	0.4108	0
4846	120	R	L	455	G	T	CGT	CTT	NonSyn	G455T	GT	9	7	8	0	0.5613171	0.4433554	0.6926017	Mosquito	A	2.290083e-05	1.366303e-06	MF.9	3.797005e-05	1117796	C	pr	D	HC	0.3599	0.4108	0
4847	120	R	L	455	G	T	CGT	CTT	NonSyn	G455T	GT	9	3	8	0	1.002283	0.4012641	1.304198	Mosquito	B	7.493022e-06	1.393832e-06	MF.9	6.324279e-05	1149965	C	pr	N	HC	0.3599	0.4108	0
4848	120	R	P	455	G	C	CGT	CCT	NonSyn	G455C	GC	4	5	1	7	0	0	0.5917169	Human	A	3.700457e-06	2.674076e-07	MF.9	0	1036945	C	pr	D	HC	0.3599	0.4108	0
4849	120	R	R	456	T	C	CGT	CGC	Syn	T456C	TC	9	9	8	0	1.136758	0.9453058	1.286238	Human	A	8.304354e-06	4.831455e-07	MF.9	0.0003186314	1036946	S	pr	N	HC	0.3599	0.4108	0
4850	120	R	R	456	T	G	CGT	CGG	Syn	T456G	TG	9	1	8	0	1.789668	0.3165225	3.290336	Human	A	1.799189e-06	1.556942e-07	MF.9	3.063763e-06	1045446	S	pr	N	HC	0.3599	0.4108	0
4851	120	R	R	456	T	C	CGT	CGC	Syn	T456C	TC	9	9	8	0	1.349879	1.162178	1.519482	Human	B	8.638697e-06	3.744363e-07	MF.9	0.0006142383	1069115	S	pr	B	HC	0.3599	0.4108	0
4852	120	R	R	456	T	A	CGT	CGA	Syn	T456A	TA	9	1	8	0	1.130733	0.6246524	1.63399	Mosquito	A	7.166782e-06	3.393327e-07	MF.9	2.022013e-05	1094054	S	pr	N	HC	0.3599	0.4108	0
4853	120	R	R	456	T	C	CGT	CGC	Syn	T456C	TC	9	9	8	0	1.112752	0.9372882	1.253105	Mosquito	A	1.724887e-05	1.124953e-06	MF.9	0.001108737	1101284	S	pr	N	HC	0.3599	0.4108	0
4854	120	R	R	456	T	C	CGT	CGC	Syn	T456C	TC	9	9	8	0	1.069919	0.926628	1.285423	Mosquito	B	8.756502e-06	5.645669e-07	MF.9	0.0004204749	1133453	S	pr	N	HC	0.3599	0.4108	0
4855	120	R	S	454	C	A	CGT	AGT	NonSyn	C454A	CA	2	7	1	7	0	0	0	Human	B	3.57888e-06	4.588673e-07	MF.9	5.560715e-06	1061883	NC	pr	L	HC	0.3599	0.4108	0
4856	121	N	D	457	A	G	AAC	GAC	NonSyn	A457G	AG	9	9	8	0	0.9527644	0.9039945	0.9896425	Human	A	1.14325e-05	8.091075e-07	MF.9	5.404637e-05	1045447	C	pr	D	HC	0.3392	0.4033	0
4857	121	N	D	457	A	G	AAC	GAC	NonSyn	A457G	AG	9	9	8	0	0.700374	0.5701958	0.8305522	Human	B	1.213945e-05	3.148199e-07	MF.9	7.296366e-05	1077616	C	pr	D	HC	0.3392	0.4033	0
4858	121	N	D	457	A	G	AAC	GAC	NonSyn	A457G	AG	9	9	8	0	1.109187	0.5718322	1.889231	Mosquito	A	1.210803e-05	6.184859e-07	MF.9	0.0001554082	1109785	C	pr	N	HC	0.3392	0.4033	0
4859	121	N	D	457	A	G	AAC	GAC	NonSyn	A457G	AG	9	9	8	0	1.426544	0.9138743	1.898579	Mosquito	B	1.180995e-05	6.889282e-07	MF.9	0.0005808836	1141954	C	pr	N	HC	0.3392	0.4033	0
4860	121	N	H	457	A	C	AAC	CAC	NonSyn	A457C	AC	2	7	1	7	0.009712962	0	0.02428241	Human	A	2.326514e-06	2.040447e-07	MF.9	0	1036947	C	pr	D	HC	0.3392	0.4033	0
4861	121	N	I	458	A	T	AAC	ATC	NonSyn	A458T	AT	3	6	1	7	0.1383416	0	0.345854	Human	A	2.37871e-06	1.833534e-07	MF.9	0	1053460	C	pr	D	HC	0.3392	0.4033	0
4862	121	N	I	458	A	T	AAC	ATC	NonSyn	A458T	AT	3	6	1	7	0.2443387	0	0.4886775	Mosquito	A	2.875636e-06	1.187371e-07	MF.9	3.102796e-06	1117798	C	pr	D	HC	0.3392	0.4033	0
4863	121	N	K	459	C	A	AAC	AAA	NonSyn	C459A	CA	9	3	8	0	0.9356543	0.7016091	1.269142	Human	A	2.985888e-06	1.847504e-07	MF.9	1.665043e-05	1029717	C	pr	N	HC	0.3392	0.4033	0
4864	121	N	K	459	C	G	AAC	AAG	NonSyn	C459G	CG	1	8	1	7	0	0	1.084727	Human	A	1.604509e-06	2.564144e-07	MF.9	0	1045449	C	pr	N	HC	0.3392	0.4033	0
4865	121	N	K	459	C	A	AAC	AAA	NonSyn	C459A	CA	9	6	8	0	0.8621432	0.6028784	1.145268	Human	B	3.57888e-06	4.588673e-07	MF.9	4.098244e-05	1061886	C	pr	N	HC	0.3392	0.4033	0
4866	121	N	K	459	C	G	AAC	AAG	NonSyn	C459G	CG	1	8	1	7	0	0	0	Human	B	1.455268e-06	7.022105e-08	MF.9	1.781845e-06	1077618	C	pr	L	HC	0.3392	0.4033	0
4867	121	N	K	459	C	G	AAC	AAG	NonSyn	C459G	CG	0	9	0	8	0	0	0	Mosquito	A	2.20927e-06	9.740866e-08	MF.9	0	1109787	C	pr	L	HC	0.3392	0.4033	0
4868	121	N	K	459	C	A	AAC	AAA	NonSyn	C459A	CA	9	2	8	0	0.7140395	0.5719286	0.8529106	Mosquito	B	4.124727e-06	2.499298e-07	MF.9	9.763098e-06	1126224	C	pr	D	HC	0.3392	0.4033	0
4869	121	N	K	459	C	G	AAC	AAG	NonSyn	C459G	CG	1	8	1	7	0	0	0	Mosquito	B	1.513275e-06	1.225367e-07	MF.9	2.440775e-06	1141956	C	pr	L	HC	0.3392	0.4033	0
4870	121	N	N	459	C	T	AAC	AAT	Syn	C459T	CT	9	9	8	0	0.5387117	0.4011389	0.7260555	Human	A	0.0002554735	2.089311e-05	MF.9	0.0005938654	1053461	S	pr	D	HC	0.3392	0.4033	0
4871	121	N	N	459	C	T	AAC	AAT	Syn	C459T	CT	9	9	8	0	0.4829993	0.2648102	0.6488307	Human	B	0.0002635581	1.843403e-05	MF.9	0.0005345535	1085630	S	pr	D	HC	0.3392	0.4033	0
4872	121	N	N	459	C	T	AAC	AAT	Syn	C459T	CT	9	9	8	0	0.4203357	0.1883025	0.7113238	Mosquito	A	0.0001578562	6.997471e-06	MF.9	0.0003032256	1117799	S	pr	D	HC	0.3392	0.4033	0
4873	121	N	N	459	C	T	AAC	AAT	Syn	C459T	CT	9	9	8	0	0.5883044	0.5302173	0.8461284	Mosquito	B	0.0002034795	7.793136e-06	MF.9	0.0005076811	1149968	S	pr	D	HC	0.3392	0.4033	0
4874	121	N	S	458	A	G	AAC	AGC	NonSyn	A458G	AG	9	4	8	0	0.6298289	0.3551008	0.978034	Mosquito	A	1.210803e-05	6.184859e-07	MF.9	0.0001179062	1109786	C	pr	D	HC	0.3392	0.4033	0
4875	121	N	S	458	A	G	AAC	AGC	NonSyn	A458G	AG	9	4	8	0	0.9135919	0.5402558	1.440309	Mosquito	B	1.180995e-05	6.889282e-07	MF.9	3.77672e-05	1141955	C	pr	N	HC	0.3392	0.4033	0
4876	121	N	Y	457	A	T	AAC	TAC	NonSyn	A457T	AT	8	4	8	0	0.9630076	0.2485474	4.498884	Mosquito	A	2.875636e-06	1.187371e-07	MF.9	3.885205e-05	1117797	C	pr	N	HC	0.3392	0.4033	0
4877	121	N	Y	457	A	T	AAC	TAC	NonSyn	A457T	AT	9	8	8	0	0.9001594	0.5478074	1.105442	Mosquito	B	2.369747e-06	1.784832e-07	MF.9	3.269042e-05	1149966	C	pr	N	HC	0.3392	0.4033	0
4878	122	G	E	461	G	A	GGA	GAA	NonSyn	G461A	GA	6	3	0	8	0	0	0	Mosquito	A	8.774931e-06	2.38219e-07	MF.9	6.380949e-06	1094057	C	pr	L	HC	0.3494	0.4009	0
4879	122	G	G	462	A	T	GGA	GGT	Syn	A462T	AT	9	2	8	0	1.837164	0.5513249	3.123004	Human	A	2.37871e-06	1.833534e-07	MF.9	1.163914e-05	1053464	S	pr	N	HC	0.3494	0.4009	0
4880	122	G	G	462	A	C	GGA	GGC	Syn	A462C	AC	2	7	1	7	0.04680289	0	0.09360578	Human	B	2.288044e-06	1.737362e-07	MF.9	0	1069120	S	pr	D	HC	0.3494	0.4009	0
4881	122	G	G	462	A	T	GGA	GGT	Syn	A462T	AT	9	1	8	0	0.795275	0.3071279	1.217278	Mosquito	B	2.369747e-06	1.784832e-07	MF.9	2.73243e-05	1149971	S	pr	N	HC	0.3494	0.4009	0
4882	122	G	V	461	G	T	GGA	GTA	NonSyn	G461T	GT	7	2	1	7	0	0	0.3882006	Human	A	5.90433e-06	1.997031e-07	MF.9	2.956114e-06	1053463	NC	pr	D	HC	0.3494	0.4009	0
4883	123	E	D	465	A	C	GAA	GAC	NonSyn	A465C	AC	1	8	0	8	0	0	0	Human	B	2.288044e-06	1.737362e-07	MF.9	0	1069123	C	pr	L	HC	0.4119	0.4011	0
4884	123	E	D	465	A	T	GAA	GAT	NonSyn	A465T	AT	9	1	8	0	1.072604	0.2809392	1.864269	Mosquito	A	2.875636e-06	1.187371e-07	MF.9	1.78013e-05	1117805	C	pr	N	HC	0.4119	0.4011	0
4885	123	E	E	465	A	G	GAA	GAG	Syn	A465G	AG	9	5	8	0	1.056819	0.4178476	1.608305	Human	B	1.213945e-05	3.148199e-07	MF.9	6.723209e-05	1077621	S	pr	N	HC	0.4119	0.4011	0
4886	123	E	K	463	G	A	GAA	AAA	NonSyn	G463A	GA	4	5	1	7	0	0	0.5319102	Human	B	7.684204e-06	4.645403e-07	MF.9	0	1061889	C	pr	D	HC	0.4119	0.4011	0
4887	123	E	K	463	G	A	GAA	AAA	NonSyn	G463A	GA	6	3	1	7	0	0	0	Mosquito	A	8.774931e-06	2.38219e-07	MF.9	3.142263e-06	1094058	C	pr	L	HC	0.4119	0.4011	0
4888	123	E	Q	463	G	C	GAA	CAA	NonSyn	G463C	GC	9	9	8	0	1.037868	0.4553852	1.470898	Human	A	3.700457e-06	2.674076e-07	MF.9	3.27948e-05	1036952	C	pr	N	HC	0.4119	0.4011	0
4889	123	E	Q	463	G	C	GAA	CAA	NonSyn	G463C	GC	9	9	8	0	1.040774	0.5850679	1.45829	Human	B	4.230269e-06	2.592937e-07	MF.9	6.817733e-05	1069121	C	pr	N	HC	0.4119	0.4011	0
4890	123	E	Q	463	G	C	GAA	CAA	NonSyn	G463C	GC	9	4	8	0	1.322077	0.5495606	2.41961	Mosquito	B	3.432927e-06	9.570197e-07	MF.9	4.582065e-05	1133459	C	pr	N	HC	0.4119	0.4011	0
4891	123	E	V	464	A	T	GAA	GTA	NonSyn	A464T	AT	1	8	0	8	0	0	0	Human	A	2.37871e-06	1.833534e-07	MF.9	0	1053466	C	pr	L	HC	0.4119	0.4011	0
4892	123	E	V	464	A	T	GAA	GTA	NonSyn	A464T	AT	1	8	1	7	0	0	0	Human	B	2.589251e-06	1.43343e-07	MF.9	3.539203e-06	1085635	C	pr	L	HC	0.4119	0.4011	0
4893	123	E	V	464	A	T	GAA	GTA	NonSyn	A464T	AT	1	8	0	8	0	0	0	Mosquito	A	2.875636e-06	1.187371e-07	MF.9	0	1117804	C	pr	L	HC	0.4119	0.4011	0
4894	123	E	V	464	A	T	GAA	GTA	NonSyn	A464T	AT	2	7	1	7	0	0	0	Mosquito	B	2.369747e-06	1.784832e-07	MF.9	0	1149973	C	pr	L	HC	0.4119	0.4011	0
4895	123	E	X	463	G	T	GAA	TAA	NonSyn	G463T	GT	9	6	8	0	0.3957067	0.2183498	0.9009944	Mosquito	A	2.290083e-05	1.366303e-06	MF.9	7.227204e-05	1117803	X	pr	D	HC	0.4119	0.4011	0
4896	124	P	L	467	C	T	CCA	CTA	NonSyn	C467T	CT	9	9	8	0	0.6178991	0.06657217	1.158308	Mosquito	A	0.0001578562	6.997471e-06	MF.9	0.0002038553	1117807	C	pr	N	HC	0.4441	0.4010	0
4897	124	P	P	468	A	G	CCA	CCG	Syn	A468G	AG	9	9	8	0	0.9156444	0.803243	0.9894122	Human	A	1.14325e-05	8.091075e-07	MF.9	2.880184e-05	1045455	S	pr	D	HC	0.4441	0.4010	0
4898	124	P	P	468	A	T	CCA	CCT	Syn	A468T	AT	9	8	8	0	0.8818383	0.5053679	1.111755	Human	A	2.37871e-06	1.833534e-07	MF.9	2.880184e-05	1053470	S	pr	N	HC	0.4441	0.4010	0
4899	124	P	P	468	A	G	CCA	CCG	Syn	A468G	AG	9	9	8	0	0.796626	0.6475018	1.027233	Human	B	1.213945e-05	3.148199e-07	MF.9	5.444898e-05	1077624	S	pr	N	HC	0.4441	0.4010	0
4900	124	P	P	468	A	T	CCA	CCT	Syn	A468T	AT	9	9	8	0	1.134743	0.8117419	1.503697	Human	B	2.589251e-06	1.43343e-07	MF.9	0.0002161459	1085639	S	pr	N	HC	0.4441	0.4010	0
4901	124	P	P	468	A	G	CCA	CCG	Syn	A468G	AG	9	7	8	0	0.9798578	0.4179731	1.653625	Mosquito	A	1.210803e-05	6.184859e-07	MF.9	5.877685e-05	1109793	S	pr	N	HC	0.4441	0.4010	0
4902	124	P	P	468	A	C	CCA	CCC	Syn	A468C	AC	9	2	8	0	0.7593587	0.2576474	1.26107	Mosquito	B	2.391816e-06	1.394774e-07	MF.9	5.033004e-06	1133462	S	pr	N	HC	0.4441	0.4010	0
4903	124	P	P	468	A	G	CCA	CCG	Syn	A468G	AG	9	9	8	0	1.051735	0.6557485	1.390389	Mosquito	B	1.180995e-05	6.889282e-07	MF.9	9.059407e-05	1141962	S	pr	N	HC	0.4441	0.4010	0
4904	124	P	P	468	A	T	CCA	CCT	Syn	A468T	AT	9	5	8	0	1.046381	0.5980255	2.831804	Mosquito	B	2.369747e-06	1.784832e-07	MF.9	4.026403e-05	1149977	S	pr	N	HC	0.4441	0.4010	0
4905	124	P	Q	467	C	A	CCA	CAA	NonSyn	C467A	CA	9	7	8	0	1.170519	0.6516025	1.420462	Human	A	2.985888e-06	1.847504e-07	MF.9	2.848435e-05	1029722	C	pr	N	HC	0.4441	0.4010	0
4906	124	P	Q	467	C	A	CCA	CAA	NonSyn	C467A	CA	9	9	8	0	0.7787608	0.6243639	0.8963164	Human	B	3.57888e-06	4.588673e-07	MF.9	5.400171e-05	1061891	C	pr	D	HC	0.4441	0.4010	0
4907	124	P	R	467	C	G	CCA	CGA	NonSyn	C467G	CG	2	7	1	7	0	0	1.57742	Human	A	1.604509e-06	2.564144e-07	MF.9	0	1045454	C	pr	N	HC	0.4441	0.4010	0
4908	124	P	R	467	C	G	CCA	CGA	NonSyn	C467G	CG	0	9	0	8	0	0	0	Mosquito	B	1.513275e-06	1.225367e-07	MF.9	0	1141961	C	pr	L	HC	0.4441	0.4010	0
4909	124	P	S	466	C	T	CCA	TCA	NonSyn	C466T	CT	9	9	8	0	0.4925886	0.2362207	0.7627303	Human	B	0.0002635581	1.843403e-05	MF.9	0.0002878584	1085637	C	pr	D	HC	0.4441	0.4010	0
4910	124	P	T	466	C	A	CCA	ACA	NonSyn	C466A	CA	9	0	8	0	0.8499509	0.1571766	1.666921	Mosquito	B	4.124727e-06	2.499298e-07	MF.9	1.458828e-05	1126228	NC	pr	N	HC	0.4441	0.4010	0
4911	125	H	D	469	C	G	CAC	GAC	NonSyn	C469G	CG	1	8	0	8	0	0	0	Human	B	1.455268e-06	7.022105e-08	MF.9	0	1077625	C	pr	L	HC	0.4766	0.4014	0
4912	125	H	H	471	C	T	CAC	CAT	Syn	C471T	CT	9	9	8	0	0.3956791	0.2320437	0.5172523	Human	B	0.0002635581	1.843403e-05	MF.9	0.0005438527	1085642	S	pr	D	HC	0.4766	0.4014	0
4913	125	H	H	471	C	T	CAC	CAT	Syn	C471T	CT	9	9	8	0	0.5686154	0.386893	0.9231939	Mosquito	A	0.0001578562	6.997471e-06	MF.9	0.0002835704	1117811	S	pr	D	HC	0.4766	0.4014	0
4914	125	H	H	471	C	T	CAC	CAT	Syn	C471T	CT	9	9	8	0	0.962863	0.6897337	1.235992	Mosquito	B	0.0002034795	7.793136e-06	MF.9	0.001250947	1149980	S	pr	N	HC	0.4766	0.4014	0
4915	125	H	L	470	A	T	CAC	CTC	NonSyn	A470T	AT	9	6	8	0	1.640501	0.7995911	2.783468	Human	A	2.37871e-06	1.833534e-07	MF.9	1.435091e-05	1053472	C	pr	N	HC	0.4766	0.4014	0
4916	125	H	L	470	A	T	CAC	CTC	NonSyn	A470T	AT	9	5	8	0	0.7145926	0.3812625	1.105845	Human	B	2.589251e-06	1.43343e-07	MF.9	3.268171e-05	1085641	C	pr	N	HC	0.4766	0.4014	0
4917	125	H	L	470	A	T	CAC	CTC	NonSyn	A470T	AT	8	2	8	0	0.9649475	0.757441	1.068798	Mosquito	B	2.369747e-06	1.784832e-07	MF.9	1.761959e-05	1149979	C	pr	N	HC	0.4766	0.4014	0
4918	125	H	N	469	C	A	CAC	AAC	NonSyn	C469A	CA	9	8	8	0	1.359706	0.6632678	2.185815	Human	A	2.985888e-06	1.847504e-07	MF.9	3.663623e-05	1029723	C	pr	N	HC	0.4766	0.4014	0
4919	125	H	N	469	C	A	CAC	AAC	NonSyn	C469A	CA	9	9	8	0	0.9309719	0.4577477	1.128244	Human	B	3.57888e-06	4.588673e-07	MF.9	0.000103122	1061892	C	pr	N	HC	0.4766	0.4014	0
4920	125	H	N	469	C	A	CAC	AAC	NonSyn	C469A	CA	9	6	8	0	1.988005	0.3380327	3.823506	Mosquito	B	4.124727e-06	2.499298e-07	MF.9	4.421605e-05	1126230	C	pr	N	HC	0.4766	0.4014	0
4921	125	H	P	470	A	C	CAC	CCC	NonSyn	A470C	AC	1	8	1	7	0	0	0	Mosquito	B	2.391816e-06	1.394774e-07	MF.9	0	1133463	NS	pr	L	HC	0.4766	0.4014	0
4922	125	H	Q	471	C	A	CAC	CAA	NonSyn	C471A	CA	9	8	8	0	1.504722	0.4869669	2.41227	Mosquito	A	6.508077e-06	1.996644e-07	MF.9	7.478779e-05	1094062	NS	pr	N	HC	0.4766	0.4014	0
4923	125	H	Q	471	C	A	CAC	CAA	NonSyn	C471A	CA	9	2	8	0	1.049697	0.4898625	1.332471	Mosquito	B	4.124727e-06	2.499298e-07	MF.9	2.671926e-05	1126231	NS	pr	N	HC	0.4766	0.4014	0
4924	125	H	Y	469	C	T	CAC	TAC	NonSyn	C469T	CT	9	9	8	0	0.4393149	0.3619676	0.5066089	Mosquito	A	0.0001578562	6.997471e-06	MF.9	0.0002668255	1117809	C	pr	D	HC	0.4766	0.4014	0
4925	126	M	I	474	G	C	ATG	ATC	NonSyn	G474C	GC	9	9	8	0	1.078381	0.8475269	1.382257	Human	A	3.700457e-06	2.674076e-07	MF.9	3.852356e-05	1036959	C	pr	N	HC	0.5951	0.3999	0
4926	126	M	I	474	G	T	ATG	ATT	NonSyn	G474T	GT	9	4	8	0	0.800944	0.5294646	2.304489	Human	A	5.90433e-06	1.997031e-07	MF.9	3.577187e-05	1053475	C	pr	N	HC	0.5951	0.3999	0
4927	126	M	I	474	G	A	ATG	ATA	NonSyn	G474A	GA	9	6	8	0	0.778887	0.3379449	1.454137	Human	B	7.684204e-06	4.645403e-07	MF.9	3.29801e-05	1061895	C	pr	N	HC	0.5951	0.3999	0
4928	126	M	I	474	G	C	ATG	ATC	NonSyn	G474C	GC	9	8	8	0	0.8636997	0.3907091	1.249452	Human	B	4.230269e-06	2.592937e-07	MF.9	5.901702e-05	1069128	C	pr	N	HC	0.5951	0.3999	0
4929	126	M	I	474	G	T	ATG	ATT	NonSyn	G474T	GT	9	7	8	0	1.049586	0.2579396	2.024461	Mosquito	A	2.290083e-05	1.366303e-06	MF.9	5.40931e-05	1117813	C	pr	N	HC	0.5951	0.3999	0
4930	126	M	I	474	G	A	ATG	ATA	NonSyn	G474A	GA	9	7	8	0	1.101919	0.3418249	1.90735	Mosquito	B	6.112924e-06	3.730988e-07	MF.9	2.961976e-05	1126233	C	pr	N	HC	0.5951	0.3999	0
4931	126	M	I	474	G	C	ATG	ATC	NonSyn	G474C	GC	9	7	8	0	1.424538	0.7357062	2.049983	Mosquito	B	3.432927e-06	9.570197e-07	MF.9	6.417614e-05	1133466	C	pr	N	HC	0.5951	0.3999	0
4932	126	M	I	474	G	T	ATG	ATT	NonSyn	G474T	GT	9	4	8	0	0.8868732	0.6433051	1.127344	Mosquito	B	7.493022e-06	1.393832e-06	MF.9	4.442963e-05	1149982	C	pr	N	HC	0.5951	0.3999	0
4933	126	M	K	473	T	A	ATG	AAG	NonSyn	T473A	TA	9	1	8	0	0.5778702	0.4457145	0.7468112	Mosquito	A	7.166782e-06	3.393327e-07	MF.9	5.998062e-05	1094063	C	pr	D	HC	0.5951	0.3999	0
4934	126	M	L	472	A	C	ATG	CTG	NonSyn	A472C	AC	9	5	8	0	0.8933887	0.3981021	1.306754	Human	A	2.326514e-06	2.040447e-07	MF.9	2.716306e-06	1036957	C	pr	N	HC	0.5951	0.3999	0
4935	126	M	L	472	A	T	ATG	TTG	NonSyn	A472T	AT	9	4	8	0	2.634372	0.4072461	4.861499	Human	A	2.37871e-06	1.833534e-07	MF.9	8.148919e-06	1053474	C	pr	N	HC	0.5951	0.3999	0
4936	126	M	L	472	A	C	ATG	CTG	NonSyn	A472C	AC	9	6	8	0	1.049216	0.5666466	1.290501	Human	B	2.288044e-06	1.737362e-07	MF.9	6.446144e-06	1069126	C	pr	N	HC	0.5951	0.3999	0
4937	126	M	L	472	A	T	ATG	TTG	NonSyn	A472T	AT	9	4	8	0	1.262682	0.2226824	2.297383	Human	B	2.589251e-06	1.43343e-07	MF.9	2.578458e-05	1085643	C	pr	N	HC	0.5951	0.3999	0
4938	126	M	L	472	A	T	ATG	TTG	NonSyn	A472T	AT	9	2	8	0	1.252647	0.7367332	1.835077	Mosquito	B	2.369747e-06	1.784832e-07	MF.9	1.927191e-05	1149981	C	pr	N	HC	0.5951	0.3999	0
4939	126	M	R	473	T	G	ATG	AGG	NonSyn	T473G	TG	1	8	1	7	0	0	0	Human	A	1.799189e-06	1.556942e-07	MF.9	0	1045460	C	pr	L	HC	0.5951	0.3999	0
4940	126	M	V	472	A	G	ATG	GTG	NonSyn	A472G	AG	9	2	8	0	0.4999839	0.1194795	0.8804882	Mosquito	B	1.180995e-05	6.889282e-07	MF.9	2.649887e-05	1141966	C	pr	D	HC	0.5951	0.3999	0
4941	127	I	I	477	C	A	ATC	ATA	Syn	C477A	CA	9	5	8	0	0.9864378	0.7662485	1.259792	Human	B	3.57888e-06	4.588673e-07	MF.9	8.415695e-06	1061897	S	pr	N	HC	0.4979	0.4007	0
4942	127	I	I	477	C	T	ATC	ATT	Syn	C477T	CT	9	9	8	0	0.4758013	0.2456448	0.7059578	Human	B	0.0002635581	1.843403e-05	MF.9	0.0004864272	1085646	S	pr	D	HC	0.4979	0.4007	0
4943	127	I	I	477	C	T	ATC	ATT	Syn	C477T	CT	9	9	8	0	0.3703432	0.2745276	0.5866628	Mosquito	B	0.0002034795	7.793136e-06	MF.9	0.0004099802	1149984	S	pr	D	HC	0.4979	0.4007	0
4944	127	I	M	477	C	G	ATC	ATG	NonSyn	C477G	CG	1	8	0	8	0	0	0	Human	A	1.604509e-06	2.564144e-07	MF.9	0	1045463	C	pr	L	HC	0.4979	0.4007	0
4945	127	I	M	477	C	G	ATC	ATG	NonSyn	C477G	CG	2	7	1	7	0	0	0.21054	Human	B	1.455268e-06	7.022105e-08	MF.9	0	1077632	C	pr	D	HC	0.4979	0.4007	0
4946	127	I	N	476	T	A	ATC	AAC	NonSyn	T476A	TA	9	9	8	0	0.959587	0.7227289	1.283841	Human	A	3.680327e-06	2.30523e-07	MF.9	0.0001133552	1029727	C	pr	N	HC	0.4979	0.4007	0
4947	127	I	N	476	T	A	ATC	AAC	NonSyn	T476A	TA	9	9	8	0	0.8689811	0.6698344	1.132262	Human	B	4.145682e-06	2.689648e-07	MF.9	0.0001013931	1061896	C	pr	N	HC	0.4979	0.4007	0
4948	127	I	N	476	T	A	ATC	AAC	NonSyn	T476A	TA	9	9	8	0	1.146952	0.707083	1.644934	Mosquito	A	7.166782e-06	3.393327e-07	MF.9	0.0001186437	1094065	C	pr	N	HC	0.4979	0.4007	0
4949	127	I	N	476	T	A	ATC	AAC	NonSyn	T476A	TA	9	9	8	0	1.190026	0.901815	1.916786	Mosquito	B	4.312763e-06	3.05777e-07	MF.9	0.0001228236	1126234	C	pr	N	HC	0.4979	0.4007	0
4950	127	I	T	476	T	C	ATC	ACC	NonSyn	T476C	TC	9	6	8	0	1.230585	0.6604225	1.440337	Human	A	8.304354e-06	4.831455e-07	MF.9	2.550493e-05	1036961	NC	pr	N	HC	0.4979	0.4007	0
4951	127	I	T	476	T	C	ATC	ACC	NonSyn	T476C	TC	9	6	8	0	0.8064461	0.6499782	0.9253105	Human	B	8.638697e-06	3.744363e-07	MF.9	3.321498e-05	1069130	NC	pr	D	HC	0.4979	0.4007	0
4952	127	I	T	476	T	C	ATC	ACC	NonSyn	T476C	TC	9	8	8	0	1.351528	1.04603	1.865819	Mosquito	A	1.724887e-05	1.124953e-06	MF.9	0.0001378833	1101299	NC	pr	B	HC	0.4979	0.4007	0
4953	127	I	T	476	T	C	ATC	ACC	NonSyn	T476C	TC	9	9	8	0	1.448936	0.9031146	1.852598	Mosquito	B	8.756502e-06	5.645669e-07	MF.9	0.0009024861	1133468	NC	pr	N	HC	0.4979	0.4007	0
4954	127	I	V	475	A	G	ATC	GTC	NonSyn	A475G	AG	9	5	8	0	1.258368	0.2111286	1.811793	Mosquito	A	1.210803e-05	6.184859e-07	MF.9	9.969003e-05	1109799	C	pr	N	HC	0.4979	0.4007	0
4955	128	V	A	479	T	C	GTC	GCC	NonSyn	T479C	TC	9	3	8	0	0.5506985	0.4203326	1.075177	Human	A	8.304354e-06	4.831455e-07	MF.9	8.534316e-06	1036963	NC	pr	N	HC	0.5017	0.4072	0
4956	128	V	A	479	T	C	GTC	GCC	NonSyn	T479C	TC	9	3	8	0	0.792498	0.4400037	1.144992	Human	B	8.638697e-06	3.744363e-07	MF.9	1.400193e-05	1069132	NC	pr	N	HC	0.5017	0.4072	0
4957	128	V	A	479	T	C	GTC	GCC	NonSyn	T479C	TC	9	3	8	0	0.9457248	0.2884124	2.468657	Mosquito	A	1.724887e-05	1.124953e-06	MF.9	2.618152e-05	1101301	NC	pr	N	HC	0.5017	0.4072	0
4958	128	V	A	479	T	C	GTC	GCC	NonSyn	T479C	TC	9	3	8	0	0.7839525	0.4314426	1.061758	Mosquito	B	8.756502e-06	5.645669e-07	MF.9	3.465724e-05	1133470	NC	pr	N	HC	0.5017	0.4072	0
4959	128	V	D	479	T	A	GTC	GAC	NonSyn	T479A	TA	9	2	8	0	0.8313277	0.7228116	0.9611645	Human	B	4.145682e-06	2.689648e-07	MF.9	2.975409e-05	1061899	C	pr	D	HC	0.5017	0.4072	0
4960	128	V	F	478	G	T	GTC	TTC	NonSyn	G478T	GT	9	5	8	0	1.395839	0.4350183	1.936555	Mosquito	B	7.493022e-06	1.393832e-06	MF.9	5.297465e-05	1149985	NC	pr	N	HC	0.5017	0.4072	0
4961	128	V	I	478	G	A	GTC	ATC	NonSyn	G478A	GA	9	2	8	0	0.6003558	0.2585624	0.9539121	Human	A	6.69739e-06	4.668841e-07	MF.9	2.404437e-05	1029729	C	pr	D	HC	0.5017	0.4072	0
4962	128	V	I	478	G	A	GTC	ATC	NonSyn	G478A	GA	9	4	8	0	0.9206013	0.5213053	1.577002	Human	B	7.684204e-06	4.645403e-07	MF.9	2.336472e-05	1061898	C	pr	N	HC	0.5017	0.4072	0
4963	128	V	I	478	G	A	GTC	ATC	NonSyn	G478A	GA	9	2	8	0	0.7521725	0.3607647	1.14358	Mosquito	A	8.774931e-06	2.38219e-07	MF.9	3.119035e-05	1094067	C	pr	N	HC	0.5017	0.4072	0
4964	128	V	I	478	G	A	GTC	ATC	NonSyn	G478A	GA	9	2	8	0	0.9266558	0.5535743	1.399692	Mosquito	B	6.112924e-06	3.730988e-07	MF.9	1.926351e-05	1126236	C	pr	N	HC	0.5017	0.4072	0
4965	128	V	V	480	C	T	GTC	GTT	Syn	C480T	CT	9	9	8	0	0.3226517	0.174039	0.6198771	Human	B	0.0002635581	1.843403e-05	MF.9	0.0004486148	1085648	S	pr	D	HC	0.5017	0.4072	0
4966	128	V	V	480	C	A	GTC	GTA	Syn	C480A	CA	9	4	8	0	1.080739	0.2182626	1.510278	Mosquito	A	6.508077e-06	1.996644e-07	MF.9	2.864618e-05	1094069	S	pr	N	HC	0.5017	0.4072	0
4967	128	V	V	480	C	T	GTC	GTT	Syn	C480T	CT	9	9	8	0	0.4743152	0.3439051	0.6576564	Mosquito	A	0.0001578562	6.997471e-06	MF.9	0.0002323524	1117817	S	pr	D	HC	0.5017	0.4072	0
4968	128	V	V	480	C	A	GTC	GTA	Syn	C480A	CA	9	1	8	0	1.105247	0.3746117	1.909056	Mosquito	B	4.124727e-06	2.499298e-07	MF.9	1.205577e-05	1126238	S	pr	N	HC	0.5017	0.4072	0
4969	129	S	C	481	A	T	AGC	TGC	NonSyn	A481T	AT	3	6	1	7	0	0	0	Human	B	2.589251e-06	1.43343e-07	MF.9	0	1085649	C	pr	L	HC	0.3910	0.4191	0
4970	129	S	C	481	A	T	AGC	TGC	NonSyn	A481T	AT	0	9	0	8	0	0	0	Mosquito	B	2.369747e-06	1.784832e-07	MF.9	0	1149987	C	pr	L	HC	0.3910	0.4191	0
4971	129	S	G	481	A	G	AGC	GGC	NonSyn	A481G	AG	9	3	8	0	0.6700587	0.2007486	1.074692	Mosquito	A	1.210803e-05	6.184859e-07	MF.9	8.698626e-05	1109804	NC	pr	N	HC	0.3910	0.4191	0
4972	129	S	N	482	G	A	AGC	AAC	NonSyn	G482A	GA	9	2	8	0	1.058196	0.2453771	1.827018	Human	A	6.69739e-06	4.668841e-07	MF.9	1.062849e-05	1029732	C	pr	N	HC	0.3910	0.4191	0
4973	129	S	N	482	G	A	AGC	AAC	NonSyn	G482A	GA	9	1	8	0	0.7719566	0.3346165	1.209297	Mosquito	A	8.774931e-06	2.38219e-07	MF.9	1.895717e-05	1094070	C	pr	N	HC	0.3910	0.4191	0
4974	129	S	R	483	C	G	AGC	AGG	NonSyn	C483G	CG	9	5	8	0	1.176076	0.6411448	1.773024	Human	A	1.604509e-06	2.564144e-07	MF.9	1.026649e-05	1045467	NC	pr	N	HC	0.3910	0.4191	0
4975	129	S	R	483	C	G	AGC	AGG	NonSyn	C483G	CG	9	6	8	0	1.131699	0.2794362	1.825444	Human	B	1.455268e-06	7.022105e-08	MF.9	1.943798e-05	1077636	NC	pr	N	HC	0.3910	0.4191	0
4976	129	S	R	481	A	C	AGC	CGC	NonSyn	A481C	AC	9	5	8	0	1.330619	0.2998829	2.637594	Mosquito	A	3.286083e-06	1.701643e-07	MF.9	5.999052e-05	1101302	NC	pr	N	HC	0.3910	0.4191	0
4977	129	S	R	481	A	C	AGC	CGC	NonSyn	A481C	AC	8	3	8	0	0.9645101	0.2746671	1.556147	Mosquito	B	2.391816e-06	1.394774e-07	MF.9	2.353966e-05	1133471	NC	pr	N	HC	0.3910	0.4191	0
4978	129	S	S	483	C	T	AGC	AGT	Syn	C483T	CT	9	9	8	0	0.5911484	0.3832491	0.7990477	Human	A	0.0002554735	2.089311e-05	MF.9	0.0004414592	1053482	S	pr	D	HC	0.3910	0.4191	0
4979	129	S	S	483	C	T	AGC	AGT	Syn	C483T	CT	9	9	8	0	1.127057	0.4634729	2.000239	Human	B	0.0002635581	1.843403e-05	MF.9	0.005079793	1085651	S	pr	N	HC	0.3910	0.4191	0
4980	129	S	S	483	C	T	AGC	AGT	Syn	C483T	CT	9	9	8	0	0.6023305	0.2904933	0.9388785	Mosquito	A	0.0001578562	6.997471e-06	MF.9	0.0006077534	1117820	S	pr	D	HC	0.3910	0.4191	0
4981	130	R	R	484	A	C	AGA	CGA	Syn	A484C	AC	9	9	8	0	1.390427	0.7600344	2.153338	Human	A	2.326514e-06	2.040447e-07	MF.9	3.539913e-05	1036966	S	pr	N	HC	0.3872	0.4284	0
4982	130	R	R	486	A	G	AGA	AGG	Syn	A486G	AG	9	6	8	0	1.231339	0.9768298	1.411629	Human	A	1.14325e-05	8.091075e-07	MF.9	7.620569e-05	1045469	S	pr	N	HC	0.3872	0.4284	0
4983	130	R	R	486	A	G	AGA	AGG	Syn	A486G	AG	9	8	8	0	0.8912455	0.5763791	1.222027	Human	B	1.213945e-05	3.148199e-07	MF.9	0.0001507713	1077638	S	pr	N	HC	0.3872	0.4284	0
4984	130	R	R	484	A	C	AGA	CGA	Syn	A484C	AC	9	1	8	0	1.444739	0.1427541	2.157734	Mosquito	A	3.286083e-06	1.701643e-07	MF.9	2.992641e-06	1101304	S	pr	N	HC	0.3872	0.4284	0
4985	130	R	R	486	A	G	AGA	AGG	Syn	A486G	AG	9	9	8	0	0.972736	0.6312354	1.223121	Mosquito	A	1.210803e-05	6.184859e-07	MF.9	0.0001675541	1109807	S	pr	N	HC	0.3872	0.4284	0
4986	130	R	R	486	A	G	AGA	AGG	Syn	A486G	AG	9	9	8	0	0.8906447	0.8089249	1.114114	Mosquito	B	1.180995e-05	6.889282e-07	MF.9	0.0001982634	1141976	S	pr	N	HC	0.3872	0.4284	0
4987	130	R	S	486	A	C	AGA	AGC	NonSyn	A486C	AC	4	5	0	8	0	0	0	Human	B	2.288044e-06	1.737362e-07	MF.9	1.507713e-06	1069137	NC	pr	L	HC	0.3872	0.4284	0
4988	130	R	S	486	A	T	AGA	AGT	NonSyn	A486T	AT	1	8	1	7	0	0	0	Mosquito	B	2.369747e-06	1.784832e-07	MF.9	0	1149992	NC	pr	L	HC	0.3872	0.4284	0
4989	130	R	T	485	G	C	AGA	ACA	NonSyn	G485C	GC	6	3	1	7	0.04425564	0	0.1106391	Human	A	3.700457e-06	2.674076e-07	MF.9	2.54056e-06	1036967	C	pr	D	HC	0.3872	0.4284	0
4990	131	Q	H	489	A	C	CAA	CAC	NonSyn	A489C	AC	9	7	8	0	3.349397	0.8646627	7.312244	Human	A	2.326514e-06	2.040447e-07	MF.9	3.301537e-05	1036970	C	pr	N	HC	0.3872	0.4320	0
4991	131	Q	H	489	A	C	CAA	CAC	NonSyn	A489C	AC	9	7	8	0	1.2565	0.3563077	2.084526	Human	B	2.288044e-06	1.737362e-07	MF.9	5.391813e-05	1069139	C	pr	N	HC	0.3872	0.4320	0
4992	131	Q	H	489	A	C	CAA	CAC	NonSyn	A489C	AC	8	2	8	0	1.045946	0.2899324	1.801959	Mosquito	A	3.286083e-06	1.701643e-07	MF.9	3.094308e-06	1101308	C	pr	N	HC	0.3872	0.4320	0
4993	131	Q	H	489	A	C	CAA	CAC	NonSyn	A489C	AC	9	2	8	0	1.337851	0.3290784	3.16255	Mosquito	B	2.391816e-06	1.394774e-07	MF.9	2.031639e-05	1133477	C	pr	N	HC	0.3872	0.4320	0
4994	131	Q	K	487	C	A	CAA	AAA	NonSyn	C487A	CA	3	6	1	7	0	0	0	Human	B	3.57888e-06	4.588673e-07	MF.9	6.330496e-06	1061904	C	pr	L	HC	0.3872	0.4320	0
4995	131	Q	P	488	A	C	CAA	CCA	NonSyn	A488C	AC	9	4	8	0	2.82703	0.6003288	5.058733	Human	A	2.326514e-06	2.040447e-07	MF.9	1.00824e-05	1036969	C	pr	N	HC	0.3872	0.4320	0
4996	131	Q	P	488	A	C	CAA	CCA	NonSyn	A488C	AC	9	4	8	0	0.9623695	0.5591025	1.728925	Mosquito	A	3.286083e-06	1.701643e-07	MF.9	7.153343e-05	1101307	C	pr	N	HC	0.3872	0.4320	0
4997	131	Q	Q	489	A	G	CAA	CAG	Syn	A489G	AG	9	6	8	0	0.8971118	0.3929231	1.476466	Human	A	1.14325e-05	8.091075e-07	MF.9	2.285679e-05	1045472	S	pr	N	HC	0.3872	0.4320	0
4998	131	Q	Q	489	A	G	CAA	CAG	Syn	A489G	AG	9	5	8	0	0.5436179	0.3654898	0.7781064	Human	B	1.213945e-05	3.148199e-07	MF.9	2.546134e-05	1077641	S	pr	D	HC	0.3872	0.4320	0
4999	131	Q	Q	489	A	G	CAA	CAG	Syn	A489G	AG	9	5	8	0	1.16248	0.1958622	1.942775	Mosquito	B	1.180995e-05	6.889282e-07	MF.9	3.611803e-05	1141979	S	pr	N	HC	0.3872	0.4320	0
5000	131	Q	R	488	A	G	CAA	CGA	NonSyn	A488G	AG	9	9	8	0	0.815457	0.6864369	0.9208805	Human	B	1.213945e-05	3.148199e-07	MF.9	0.0001043922	1077640	C	pr	D	HC	0.3872	0.4320	0
5001	132	E	A	491	A	C	GAG	GCG	NonSyn	A491C	AC	9	1	8	0	1.430928	0.1938183	2.724994	Human	A	2.326514e-06	2.040447e-07	MF.9	5.141428e-06	1036972	C	pr	N	HC	0.3910	0.4212	0
5002	132	E	D	492	G	T	GAG	GAT	NonSyn	G492T	GT	9	6	8	0	0.8143837	0.6232701	1.168433	Human	A	5.90433e-06	1.997031e-07	MF.9	3.523812e-05	1053491	C	pr	N	HC	0.3910	0.4212	0
5003	132	E	D	492	G	C	GAG	GAC	NonSyn	G492C	GC	8	4	8	0	2.06708	0.5152868	2.89379	Mosquito	B	3.432927e-06	9.570197e-07	MF.9	3.368258e-05	1133480	C	pr	N	HC	0.3910	0.4212	0
5004	132	E	E	492	G	A	GAG	GAA	Syn	G492A	GA	9	6	8	0	1.350632	0.4280459	2.638935	Human	A	6.69739e-06	4.668841e-07	MF.9	6.795923e-05	1029737	S	pr	N	HC	0.3910	0.4212	0
5005	132	E	E	492	G	A	GAG	GAA	Syn	G492A	GA	9	3	8	0	1.229422	0.2396414	2.05472	Mosquito	A	8.774931e-06	2.38219e-07	MF.9	5.895068e-05	1094075	S	pr	N	HC	0.3910	0.4212	0
5006	132	E	E	492	G	A	GAG	GAA	Syn	G492A	GA	9	6	8	0	1.20387	0.709655	1.881124	Mosquito	B	6.112924e-06	3.730988e-07	MF.9	7.634719e-05	1126244	S	pr	N	HC	0.3910	0.4212	0
5007	132	E	K	490	G	A	GAG	AAG	NonSyn	G490A	GA	3	6	0	8	0	0	0	Mosquito	A	8.774931e-06	2.38219e-07	MF.9	0	1094074	C	pr	L	HC	0.3910	0.4212	0
5008	132	E	Q	490	G	C	GAG	CAG	NonSyn	G490C	GC	9	6	8	0	0.9962071	0.3730301	2.136967	Human	B	4.230269e-06	2.592937e-07	MF.9	1.816805e-05	1069140	C	pr	N	HC	0.3910	0.4212	0
5009	132	E	Q	490	G	C	GAG	CAG	NonSyn	G490C	GC	9	5	8	0	1.24808	0.4529169	1.714818	Mosquito	A	1.263716e-05	7.038203e-07	MF.9	6.97892e-05	1101309	C	pr	N	HC	0.3910	0.4212	0
5010	132	E	Q	490	G	C	GAG	CAG	NonSyn	G490C	GC	9	7	8	0	0.8787611	0.5741591	1.288458	Mosquito	B	3.432927e-06	9.570197e-07	MF.9	2.656648e-05	1133478	C	pr	N	HC	0.3910	0.4212	0
5011	132	E	V	491	A	T	GAG	GTG	NonSyn	A491T	AT	4	5	0	8	0	0	0	Human	B	2.589251e-06	1.43343e-07	MF.9	0	1085659	C	pr	L	HC	0.3910	0.4212	0
5012	132	E	X	490	G	T	GAG	TAG	NonSyn	G490T	GT	9	9	8	0	1.015152	0.684958	1.332497	Human	A	5.90433e-06	1.997031e-07	MF.9	5.525278e-05	1053489	X	pr	N	HC	0.3910	0.4212	0
5013	132	E	X	490	G	T	GAG	TAG	NonSyn	G490T	GT	9	9	8	0	0.8368946	0.6853443	1.028747	Human	B	7.052585e-06	4.58263e-07	MF.9	3.48221e-05	1085658	X	pr	N	HC	0.3910	0.4212	0
5014	133	K	K	495	A	G	AAA	AAG	Syn	A495G	AG	9	7	8	0	0.6597202	0.2566464	1.054831	Human	A	1.14325e-05	8.091075e-07	MF.9	5.332873e-05	1045476	S	pr	N	HC	0.3948	0.4144	0
5015	133	K	K	495	A	G	AAA	AAG	Syn	A495G	AG	9	7	8	0	0.8505987	0.2228979	1.381541	Human	B	1.213945e-05	3.148199e-07	MF.9	1.717781e-05	1077645	S	pr	N	HC	0.3948	0.4144	0
5016	133	K	K	495	A	G	AAA	AAG	Syn	A495G	AG	9	5	8	0	0.6171067	0.3168878	1.277284	Mosquito	B	1.180995e-05	6.889282e-07	MF.9	5.800438e-05	1141983	S	pr	N	HC	0.3948	0.4144	0
5017	133	K	N	495	A	T	AAA	AAT	NonSyn	A495T	AT	2	7	1	7	1.601738	0	3.203475	Mosquito	A	2.875636e-06	1.187371e-07	MF.9	3.360859e-06	1117832	C	pr	N	HC	0.3948	0.4144	0
5018	133	K	N	495	A	C	AAA	AAC	NonSyn	A495C	AC	1	8	1	7	0.3906211	0	0.9765526	Mosquito	B	2.391816e-06	1.394774e-07	MF.9	0	1133483	C	pr	D	HC	0.3948	0.4144	0
5019	133	K	N	495	A	T	AAA	AAT	NonSyn	A495T	AT	1	8	1	7	0	0	0	Mosquito	B	2.369747e-06	1.784832e-07	MF.9	0	1150001	C	pr	L	HC	0.3948	0.4144	0
5020	133	K	Q	493	A	C	AAA	CAA	NonSyn	A493C	AC	2	7	0	8	0	0	0	Mosquito	B	2.391816e-06	1.394774e-07	MF.9	0	1133481	C	pr	L	HC	0.3948	0.4144	0
5021	133	K	R	494	A	G	AAA	AGA	NonSyn	A494G	AG	9	8	8	0	0.7361956	0.5903136	1.034412	Human	A	1.14325e-05	8.091075e-07	MF.9	4.60205e-05	1045475	C	pr	N	HC	0.3948	0.4144	0
5022	133	K	R	494	A	G	AAA	AGA	NonSyn	A494G	AG	9	5	8	0	0.7017627	0.1237105	1.314542	Human	B	1.213945e-05	3.148199e-07	MF.9	2.964789e-05	1077644	C	pr	N	HC	0.3948	0.4144	0
5023	133	K	T	494	A	C	AAA	ACA	NonSyn	A494C	AC	9	8	8	0	1.742835	0.3927861	3.179594	Human	A	2.326514e-06	2.040447e-07	MF.9	8.181423e-05	1036975	C	pr	N	HC	0.3948	0.4144	0
5024	133	K	T	494	A	C	AAA	ACA	NonSyn	A494C	AC	9	9	8	0	0.9933361	0.5613855	1.377909	Human	B	2.288044e-06	1.737362e-07	MF.9	0.0001092291	1069144	C	pr	N	HC	0.3948	0.4144	0
5025	133	K	T	494	A	C	AAA	ACA	NonSyn	A494C	AC	9	3	8	0	2.308559	0.3693361	6.187004	Mosquito	A	3.286083e-06	1.701643e-07	MF.9	1.015696e-05	1101313	C	pr	N	HC	0.3948	0.4144	0
5026	133	K	T	494	A	C	AAA	ACA	NonSyn	A494C	AC	9	8	8	0	1.184977	0.7334955	1.537431	Mosquito	B	2.391816e-06	1.394774e-07	MF.9	6.895432e-05	1133482	C	pr	N	HC	0.3948	0.4144	0
5027	133	K	X	493	A	T	AAA	TAA	NonSyn	A493T	AT	0	9	0	8	0	0	0	Mosquito	A	2.875636e-06	1.187371e-07	MF.9	0	1117830	X	pr	L	HC	0.3948	0.4144	0
5028	133	K	X	493	A	T	AAA	TAA	NonSyn	A493T	AT	1	8	1	7	0	0	0	Mosquito	B	2.369747e-06	1.784832e-07	MF.9	0	1149999	X	pr	L	HC	0.3948	0.4144	0
5029	134	G	G	498	G	A	GGG	GGA	Syn	G498A	GA	9	9	8	0	0.8735529	0.6011518	1.205852	Human	A	6.69739e-06	4.668841e-07	MF.9	4.992708e-05	1029740	S	pr	N	HC	0.3807	0.4117	0
5030	134	G	G	498	G	A	GGG	GGA	Syn	G498A	GA	9	6	8	0	0.9611611	0.8179883	1.155696	Mosquito	A	8.774931e-06	2.38219e-07	MF.9	6.682282e-05	1094078	S	pr	N	HC	0.3807	0.4117	0
5031	134	G	G	498	G	A	GGG	GGA	Syn	G498A	GA	9	8	8	0	1.302525	0.7477637	1.670076	Mosquito	B	6.112924e-06	3.730988e-07	MF.9	5.184664e-05	1126247	S	pr	N	HC	0.3807	0.4117	0
5032	134	G	R	496	G	A	GGG	AGG	NonSyn	G496A	GA	9	9	8	0	0.9351646	0.8586336	1.022699	Human	A	6.69739e-06	4.668841e-07	MF.9	8.780334e-05	1029738	C	pr	N	HC	0.3807	0.4117	0
5033	134	G	R	496	G	A	GGG	AGG	NonSyn	G496A	GA	9	9	8	0	0.8969132	0.5818539	1.203506	Human	B	7.684204e-06	4.645403e-07	MF.9	0.000129777	1061907	C	pr	N	HC	0.3807	0.4117	0
5034	134	G	R	496	G	A	GGG	AGG	NonSyn	G496A	GA	9	6	8	0	1.267884	0.5350649	2.990704	Mosquito	A	8.774931e-06	2.38219e-07	MF.9	3.394018e-05	1094076	C	pr	N	HC	0.3807	0.4117	0
5035	134	G	R	496	G	A	GGG	AGG	NonSyn	G496A	GA	9	9	8	0	0.9376714	0.799487	1.09899	Mosquito	B	6.112924e-06	3.730988e-07	MF.9	7.77144e-05	1126245	C	pr	N	HC	0.3807	0.4117	0
5036	134	G	V	497	G	T	GGG	GTG	NonSyn	G497T	GT	9	3	8	0	1.421769	0.3144309	2.291077	Human	A	5.90433e-06	1.997031e-07	MF.9	3.201545e-05	1053496	NC	pr	N	HC	0.3807	0.4117	0
5037	134	G	V	497	G	T	GGG	GTG	NonSyn	G497T	GT	9	6	8	0	1.119342	0.4565148	1.583958	Human	B	7.052585e-06	4.58263e-07	MF.9	6.032829e-05	1085665	NC	pr	N	HC	0.3807	0.4117	0
5038	134	G	V	497	G	T	GGG	GTG	NonSyn	G497T	GT	9	1	8	0	0.4321364	0.08153533	0.9340916	Mosquito	B	7.493022e-06	1.393832e-06	MF.9	2.02204e-05	1150003	NC	pr	D	HC	0.3807	0.4117	0
5039	135	K	E	499	A	G	AAA	GAA	NonSyn	A499G	AG	9	5	8	0	0.7320735	0.4685068	1.095011	Human	A	1.14325e-05	8.091075e-07	MF.9	4.989863e-05	1045477	C	pr	N	HC	0.2951	0.4040	0
5040	135	K	E	499	A	G	AAA	GAA	NonSyn	A499G	AG	9	4	8	0	0.8054684	0.4199903	1.078023	Human	B	1.213945e-05	3.148199e-07	MF.9	3.848072e-05	1077646	C	pr	N	HC	0.2951	0.4040	0
5041	135	K	E	499	A	G	AAA	GAA	NonSyn	A499G	AG	9	5	8	0	1.107918	0.4829373	1.96936	Mosquito	A	1.210803e-05	6.184859e-07	MF.9	7.656127e-05	1109815	C	pr	N	HC	0.2951	0.4040	0
5042	135	K	K	501	A	G	AAA	AAG	Syn	A501G	AG	9	8	8	0	0.6173332	0.3074285	1.116628	Human	A	1.14325e-05	8.091075e-07	MF.9	2.908137e-05	1045479	S	pr	N	HC	0.2951	0.4040	0
5043	135	K	K	501	A	G	AAA	AAG	Syn	A501G	AG	9	7	8	0	1.549724	0.4172408	3.000809	Human	B	1.213945e-05	3.148199e-07	MF.9	0.0002422415	1077648	S	pr	N	HC	0.2951	0.4040	0
5044	135	K	K	501	A	G	AAA	AAG	Syn	A501G	AG	9	9	8	0	0.5606599	0.3447391	0.7934418	Mosquito	A	1.210803e-05	6.184859e-07	MF.9	4.100405e-05	1109817	S	pr	D	HC	0.2951	0.4040	0
5045	135	K	N	501	A	C	AAA	AAC	NonSyn	A501C	AC	9	8	8	0	1.105443	0.4428288	1.60097	Human	A	2.326514e-06	2.040447e-07	MF.9	3.965642e-05	1036982	C	pr	N	HC	0.2951	0.4040	0
5046	135	K	N	501	A	C	AAA	AAC	NonSyn	A501C	AC	9	9	8	0	1.168603	0.6587361	1.678471	Human	B	2.288044e-06	1.737362e-07	MF.9	0.0001177563	1069151	C	pr	N	HC	0.2951	0.4040	0
5047	135	K	N	501	A	C	AAA	AAC	NonSyn	A501C	AC	9	4	8	0	1.197857	0.3063736	4.182778	Mosquito	A	3.286083e-06	1.701643e-07	MF.9	1.708502e-05	1101320	C	pr	N	HC	0.2951	0.4040	0
5048	135	K	N	501	A	C	AAA	AAC	NonSyn	A501C	AC	9	2	8	0	1.180421	0.9188274	1.497554	Mosquito	B	2.391816e-06	1.394774e-07	MF.9	1.565068e-05	1133489	C	pr	N	HC	0.2951	0.4040	0
5049	135	K	T	500	A	C	AAA	ACA	NonSyn	A500C	AC	9	1	8	0	0.7187324	0.4160422	1.143031	Human	A	2.326514e-06	2.040447e-07	MF.9	2.626071e-06	1036981	C	pr	N	HC	0.2951	0.4040	0
5050	135	K	X	499	A	T	AAA	TAA	NonSyn	A499T	AT	8	1	8	0	0.8468646	0.2904641	1.381218	Human	B	2.589251e-06	1.43343e-07	MF.9	9.620179e-06	1085667	X	pr	N	HC	0.2951	0.4040	0
5051	135	K	X	499	A	T	AAA	TAA	NonSyn	A499T	AT	0	9	0	8	0	0	0	Mosquito	A	2.875636e-06	1.187371e-07	MF.9	0	1117836	X	pr	L	HC	0.2951	0.4040	0
5052	136	S	I	503	G	T	AGT	ATT	NonSyn	G503T	GT	9	1	8	0	0.8124253	0.3148971	1.187494	Human	A	5.90433e-06	1.997031e-07	MF.9	2.164537e-05	1053502	NC	pr	N	HC	0.3053	0.3986	0
5053	136	S	I	503	G	T	AGT	ATT	NonSyn	G503T	GT	9	3	8	0	0.7944192	0.2613168	2.719871	Human	B	7.052585e-06	4.58263e-07	MF.9	8.562698e-05	1085671	NC	pr	N	HC	0.3053	0.3986	0
5054	136	S	N	503	G	A	AGT	AAT	NonSyn	G503A	GA	9	9	8	0	1.160463	0.8375233	1.488985	Human	A	6.69739e-06	4.668841e-07	MF.9	0.0002651558	1029741	C	pr	N	HC	0.3053	0.3986	0
5055	136	S	N	503	G	A	AGT	AAT	NonSyn	G503A	GA	9	9	8	0	1.001407	0.8189553	1.297072	Human	B	7.684204e-06	4.645403e-07	MF.9	0.0002854233	1061910	C	pr	N	HC	0.3053	0.3986	0
5056	136	S	N	503	G	A	AGT	AAT	NonSyn	G503A	GA	9	3	8	0	1.439242	0.5512438	2.544061	Mosquito	A	8.774931e-06	2.38219e-07	MF.9	2.109208e-05	1094079	C	pr	N	HC	0.3053	0.3986	0
5057	136	S	N	503	G	A	AGT	AAT	NonSyn	G503A	GA	9	8	8	0	0.9972636	0.5486321	1.484957	Mosquito	B	6.112924e-06	3.730988e-07	MF.9	6.808551e-05	1126248	C	pr	N	HC	0.3053	0.3986	0
5058	136	S	R	502	A	C	AGT	CGT	NonSyn	A502C	AC	3	6	1	7	0	0	0	Human	B	2.288044e-06	1.737362e-07	MF.9	1.743159e-06	1069152	NC	pr	L	HC	0.3053	0.3986	0
5059	136	S	R	502	A	C	AGT	CGT	NonSyn	A502C	AC	1	8	1	7	0.1633224	0	0.4083059	Mosquito	A	3.286083e-06	1.701643e-07	MF.9	0	1101321	NC	pr	D	HC	0.3053	0.3986	0
5060	136	S	R	502	A	C	AGT	CGT	NonSyn	A502C	AC	2	7	1	7	0.246262	0	0.6156551	Mosquito	B	2.391816e-06	1.394774e-07	MF.9	2.299432e-06	1133490	NC	pr	D	HC	0.3053	0.3986	0
5061	136	S	S	504	T	C	AGT	AGC	Syn	T504C	TC	9	8	8	0	0.9893049	0.4031501	1.410057	Human	A	8.304354e-06	4.831455e-07	MF.9	3.227889e-05	1036985	S	pr	N	HC	0.3053	0.3986	0
5062	136	S	S	504	T	C	AGT	AGC	Syn	T504C	TC	9	9	8	0	0.921725	0.5890926	1.224467	Human	B	8.638697e-06	3.744363e-07	MF.9	9.280061e-05	1069154	S	pr	N	HC	0.3053	0.3986	0
5063	136	S	S	504	T	C	AGT	AGC	Syn	T504C	TC	9	8	8	0	0.9418377	0.7215576	1.399229	Mosquito	A	1.724887e-05	1.124953e-06	MF.9	5.201271e-05	1101323	S	pr	N	HC	0.3053	0.3986	0
5064	136	S	S	504	T	C	AGT	AGC	Syn	T504C	TC	9	6	8	0	1.213897	0.875628	1.717166	Mosquito	B	8.756502e-06	5.645669e-07	MF.9	0.0001460506	1133492	S	pr	N	HC	0.3053	0.3986	0
5065	137	L	H	506	T	A	CTT	CAT	NonSyn	T506A	TA	9	9	8	0	0.9882231	0.6279052	1.245736	Human	A	3.680327e-06	2.30523e-07	MF.9	8.604984e-05	1029744	C	pr	N	HC	0.3019	0.3898	0
5066	137	L	H	506	T	A	CTT	CAT	NonSyn	T506A	TA	9	9	8	0	1.226734	0.8361178	1.649935	Human	B	4.145682e-06	2.689648e-07	MF.9	0.0002495341	1061913	C	pr	N	HC	0.3019	0.3898	0
5067	137	L	H	506	T	A	CTT	CAT	NonSyn	T506A	TA	9	8	8	0	1.114985	0.5250501	1.700543	Mosquito	B	4.312763e-06	3.05777e-07	MF.9	3.989647e-05	1126251	C	pr	N	HC	0.3019	0.3898	0
5068	137	L	I	505	C	A	CTT	ATT	NonSyn	C505A	CA	9	9	8	0	1.233081	0.849649	1.728843	Human	A	2.985888e-06	1.847504e-07	MF.9	0.0001344349	1029743	C	pr	N	HC	0.3019	0.3898	0
5069	137	L	I	505	C	A	CTT	ATT	NonSyn	C505A	CA	9	9	8	0	1.01803	0.7596182	2.003871	Human	B	3.57888e-06	4.588673e-07	MF.9	0.0004745748	1061912	C	pr	N	HC	0.3019	0.3898	0
5070	137	L	I	505	C	A	CTT	ATT	NonSyn	C505A	CA	9	9	8	0	1.354762	0.6391582	1.878715	Mosquito	A	6.508077e-06	1.996644e-07	MF.9	0.0002826456	1094081	C	pr	N	HC	0.3019	0.3898	0
5071	137	L	I	505	C	A	CTT	ATT	NonSyn	C505A	CA	9	9	8	0	0.9009368	0.7382148	1.110489	Mosquito	B	4.124727e-06	2.499298e-07	MF.9	9.398287e-05	1126250	C	pr	N	HC	0.3019	0.3898	0
5072	137	L	L	507	T	C	CTT	CTC	Syn	T507C	TC	9	9	8	0	0.9966297	0.5732196	1.423351	Human	A	8.304354e-06	4.831455e-07	MF.9	0.0002844365	1036987	S	pr	N	HC	0.3019	0.3898	0
5073	137	L	L	507	T	G	CTT	CTG	Syn	T507G	TG	9	5	8	0	2.128247	1.029177	3.227829	Human	A	1.799189e-06	1.556942e-07	MF.9	5.144064e-05	1045484	S	pr	B	HC	0.3019	0.3898	0
5074	137	L	L	507	T	C	CTT	CTC	Syn	T507C	TC	9	9	8	0	1.075143	0.8071154	1.213733	Human	B	8.638697e-06	3.744363e-07	MF.9	0.0004921179	1069156	S	pr	N	HC	0.3019	0.3898	0
5075	137	L	L	507	T	G	CTT	CTG	Syn	T507G	TG	9	8	8	0	0.8736525	0.2125716	13.60167	Human	B	1.80746e-06	1.143024e-07	MF.9	0.0001572327	1077653	S	pr	N	HC	0.3019	0.3898	0
5076	137	L	L	507	T	C	CTT	CTC	Syn	T507C	TC	9	9	8	0	0.9739453	0.8119683	1.089272	Mosquito	A	1.724887e-05	1.124953e-06	MF.9	0.0001128272	1101325	S	pr	N	HC	0.3019	0.3898	0
5077	137	L	L	507	T	G	CTT	CTG	Syn	T507G	TG	9	4	8	0	1.367387	0.6485814	3.09401	Mosquito	A	3.486291e-06	1.611304e-07	MF.9	2.014772e-05	1109822	S	pr	N	HC	0.3019	0.3898	0
5078	137	L	L	507	T	A	CTT	CTA	Syn	T507A	TA	9	1	8	0	1.518364	0.2054973	2.886112	Mosquito	B	4.312763e-06	3.05777e-07	MF.9	1.017172e-05	1126252	S	pr	N	HC	0.3019	0.3898	0
5079	137	L	L	507	T	C	CTT	CTC	Syn	T507C	TC	9	9	8	0	1.041271	0.7716194	1.277455	Mosquito	B	8.756502e-06	5.645669e-07	MF.9	0.0003102376	1133494	S	pr	N	HC	0.3019	0.3898	0
5080	137	L	L	507	T	G	CTT	CTG	Syn	T507G	TG	9	9	8	0	1.033904	0.4872898	1.261246	Mosquito	B	2.030327e-06	1.119074e-07	MF.9	5.848741e-05	1141991	S	pr	N	HC	0.3019	0.3898	0
5081	137	L	P	506	T	C	CTT	CCT	NonSyn	T506C	TC	9	0	8	0	0.9836223	0.1857238	1.788104	Mosquito	B	8.756502e-06	5.645669e-07	MF.9	2.244176e-05	1133493	C	pr	N	HC	0.3019	0.3898	0
5082	137	L	R	506	T	G	CTT	CGT	NonSyn	T506G	TG	2	7	0	8	0	0	0	Human	A	1.799189e-06	1.556942e-07	MF.9	0	1045483	C	pr	L	HC	0.3019	0.3898	0
5083	137	L	R	506	T	G	CTT	CGT	NonSyn	T506G	TG	1	8	0	8	0	0	0	Mosquito	A	3.486291e-06	1.611304e-07	MF.9	0	1109821	C	pr	L	HC	0.3019	0.3898	0
5084	137	L	R	506	T	G	CTT	CGT	NonSyn	T506G	TG	1	8	1	7	0	0	1.327605	Mosquito	B	2.030327e-06	1.119074e-07	MF.9	0	1141990	C	pr	N	HC	0.3019	0.3898	0
5085	138	L	L	510	G	A	CTG	CTA	Syn	G510A	GA	9	9	8	0	1.065613	0.7816297	1.33431	Human	A	6.69739e-06	4.668841e-07	MF.9	6.687987e-05	1029748	S	pr	N	HC	0.2988	0.3988	0
5086	138	L	L	510	G	C	CTG	CTC	Syn	G510C	GC	9	9	8	0	1.350545	0.7630418	1.938049	Human	A	3.700457e-06	2.674076e-07	MF.9	0.0002127996	1036989	S	pr	N	HC	0.2988	0.3988	0
5087	138	L	L	510	G	A	CTG	CTA	Syn	G510A	GA	9	9	8	0	0.878635	0.7261606	1.040526	Human	B	7.684204e-06	4.645403e-07	MF.9	0.0001288114	1061917	S	pr	N	HC	0.2988	0.3988	0
5088	138	L	L	510	G	C	CTG	CTC	Syn	G510C	GC	9	9	8	0	0.8434532	0.6450228	1.171673	Human	B	4.230269e-06	2.592937e-07	MF.9	0.0001463766	1069158	S	pr	N	HC	0.2988	0.3988	0
5089	138	L	L	510	G	A	CTG	CTA	Syn	G510A	GA	9	6	8	0	0.9379934	0.7168635	1.328795	Mosquito	A	8.774931e-06	2.38219e-07	MF.9	5.34656e-05	1094086	S	pr	N	HC	0.2988	0.3988	0
5090	138	L	L	510	G	C	CTG	CTC	Syn	G510C	GC	4	5	1	7	0	0	0	Mosquito	A	1.263716e-05	7.038203e-07	MF.9	8.225477e-06	1101327	S	pr	L	HC	0.2988	0.3988	0
5091	138	L	L	508	C	T	CTG	TTG	Syn	C508T	CT	9	9	1	7	0	0	0.130362	Mosquito	A	0.0001578562	6.997471e-06	MF.9	0.0001272492	1117842	S	pr	D	HC	0.2988	0.3988	0
5092	138	L	L	510	G	T	CTG	CTT	Syn	G510T	GT	2	8	1	7	0	0	0	Mosquito	A	2.290083e-05	1.366303e-06	MF.9	1.645095e-05	1117843	S	pr	L	HC	0.2988	0.3988	0
5093	138	L	L	510	G	A	CTG	CTA	Syn	G510A	GA	9	7	8	0	1.041967	0.7087449	1.239359	Mosquito	B	6.112924e-06	3.730988e-07	MF.9	4.08929e-05	1126255	S	pr	N	HC	0.2988	0.3988	0
5094	138	L	L	510	G	C	CTG	CTC	Syn	G510C	GC	9	9	8	0	1.200658	0.8237345	1.477373	Mosquito	B	3.432927e-06	9.570197e-07	MF.9	6.645096e-05	1133496	S	pr	N	HC	0.2988	0.3988	0
5095	138	L	M	508	C	A	CTG	ATG	NonSyn	C508A	CA	9	8	8	0	0.9202635	0.5254708	1.26717	Human	A	2.985888e-06	1.847504e-07	MF.9	5.634371e-05	1029746	C	pr	N	HC	0.2988	0.3988	0
5096	138	L	M	508	C	A	CTG	ATG	NonSyn	C508A	CA	9	7	8	0	1.034409	0.582844	1.464324	Human	B	3.57888e-06	4.588673e-07	MF.9	1.194275e-05	1061915	C	pr	N	HC	0.2988	0.3988	0
5097	138	L	M	508	C	A	CTG	ATG	NonSyn	C508A	CA	9	5	8	0	1.365791	0.6534882	1.960001	Mosquito	B	4.124727e-06	2.499298e-07	MF.9	3.528208e-05	1126253	C	pr	N	HC	0.2988	0.3988	0
5098	138	L	R	509	T	G	CTG	CGG	NonSyn	T509G	TG	2	7	1	7	0.1544727	0	0.3089455	Mosquito	A	3.486291e-06	1.611304e-07	MF.9	0	1109824	C	pr	D	HC	0.2988	0.3988	0
5099	138	L	V	508	C	G	CTG	GTG	NonSyn	C508G	CG	0	9	0	8	0	0	0	Human	B	1.455268e-06	7.022105e-08	MF.9	0	1077654	C	pr	L	HC	0.2988	0.3988	0
5100	139	F	C	512	T	G	TTT	TGT	NonSyn	T512G	TG	2	7	1	7	0	0	0	Mosquito	A	3.486291e-06	1.611304e-07	MF.9	0	1109826	NC	pr	L	HC	0.3631	0.4190	0
5101	139	F	F	513	T	C	TTT	TTC	Syn	T513C	TC	9	9	8	0	1.477624	1.073157	1.887355	Human	A	8.304354e-06	4.831455e-07	MF.9	0.0001404692	1036992	S	pr	B	HC	0.3631	0.4190	0
5102	139	F	F	513	T	C	TTT	TTC	Syn	T513C	TC	9	9	8	0	1.10909	0.6725076	1.652425	Human	B	8.638697e-06	3.744363e-07	MF.9	0.0001644943	1069161	S	pr	N	HC	0.3631	0.4190	0
5103	139	F	F	513	T	C	TTT	TTC	Syn	T513C	TC	9	9	8	0	1.090855	0.5122115	1.284331	Mosquito	A	1.724887e-05	1.124953e-06	MF.9	0.0002846135	1101330	S	pr	N	HC	0.3631	0.4190	0
5104	139	F	F	513	T	C	TTT	TTC	Syn	T513C	TC	9	9	8	0	0.9456254	0.8141499	0.9771995	Mosquito	B	8.756502e-06	5.645669e-07	MF.9	0.0001072294	1133499	S	pr	D	HC	0.3631	0.4190	0
5105	139	F	I	511	T	A	TTT	ATT	NonSyn	T511A	TA	9	9	8	0	1.056895	0.84636	1.203158	Human	A	3.680327e-06	2.30523e-07	MF.9	0.0002983764	1029749	C	pr	N	HC	0.3631	0.4190	0
5106	139	F	I	511	T	A	TTT	ATT	NonSyn	T511A	TA	9	9	8	0	0.9482188	0.8967172	1.049263	Human	B	4.145682e-06	2.689648e-07	MF.9	0.0005027609	1061918	C	pr	N	HC	0.3631	0.4190	0
5107	139	F	I	511	T	A	TTT	ATT	NonSyn	T511A	TA	9	3	8	0	1.532953	0.469848	3.188521	Mosquito	A	7.166782e-06	3.393327e-07	MF.9	1.753471e-05	1094087	C	pr	N	HC	0.3631	0.4190	0
5108	139	F	I	511	T	A	TTT	ATT	NonSyn	T511A	TA	9	9	8	0	1.054566	0.9079669	1.135735	Mosquito	B	4.312763e-06	3.05777e-07	MF.9	0.0001877727	1126256	C	pr	N	HC	0.3631	0.4190	0
5109	139	F	L	513	T	A	TTT	TTA	NonSyn	T513A	TA	9	1	8	0	0.6998734	0.1426652	2.831657	Mosquito	B	4.312763e-06	3.05777e-07	MF.9	5.2307e-06	1126258	C	pr	N	HC	0.3631	0.4190	0
5110	139	F	L	513	T	G	TTT	TTG	NonSyn	T513G	TG	2	7	1	7	0	0	0	Mosquito	B	2.030327e-06	1.119074e-07	MF.9	0	1141996	C	pr	L	HC	0.3631	0.4190	0
5111	139	F	S	512	T	C	TTT	TCT	NonSyn	T512C	TC	9	6	8	0	4.401974	0.6150058	8.188942	Human	A	8.304354e-06	4.831455e-07	MF.9	8.569884e-05	1036991	NC	pr	N	HC	0.3631	0.4190	0
5112	139	F	S	512	T	C	TTT	TCT	NonSyn	T512C	TC	9	8	8	0	1.105567	0.3977371	1.443291	Mosquito	B	8.756502e-06	5.645669e-07	MF.9	3.47009e-05	1133498	NC	pr	N	HC	0.3631	0.4190	0
5113	139	F	V	511	T	G	TTT	GTT	NonSyn	T511G	TG	9	1	8	0	0.994477	0.7203126	1.569096	Human	A	1.799189e-06	1.556942e-07	MF.9	2.057768e-05	1045487	NC	pr	N	HC	0.3631	0.4190	0
5114	139	F	V	511	T	G	TTT	GTT	NonSyn	T511G	TG	9	3	8	0	1.64607	0.4130355	2.27544	Human	B	1.80746e-06	1.143024e-07	MF.9	2.556411e-05	1077656	NC	pr	N	HC	0.3631	0.4190	0
5115	139	F	V	511	T	G	TTT	GTT	NonSyn	T511G	TG	9	3	8	0	2.274272	0.6650474	3.996029	Mosquito	A	3.486291e-06	1.611304e-07	MF.9	5.260412e-05	1109825	NC	pr	N	HC	0.3631	0.4190	0
5116	139	F	V	511	T	G	TTT	GTT	NonSyn	T511G	TG	9	4	8	0	1.364554	0.4288129	2.300295	Mosquito	B	2.030327e-06	1.119074e-07	MF.9	3.313636e-05	1141994	NC	pr	N	HC	0.3631	0.4190	0
5117	140	K	E	514	A	G	AAA	GAA	NonSyn	A514G	AG	9	3	8	0	0.5770145	0.293067	0.9188778	Human	A	1.14325e-05	8.091075e-07	MF.9	1.322804e-05	1045490	C	pr	D	HC	0.2849	0.4210	0
5118	140	K	K	516	A	G	AAA	AAG	Syn	A516G	AG	9	8	8	0	1.577365	0.7288793	3.038471	Human	A	1.14325e-05	8.091075e-07	MF.9	5.058352e-05	1045492	S	pr	N	HC	0.2849	0.4210	0
5119	140	K	K	516	A	G	AAA	AAG	Syn	A516G	AG	9	6	8	0	1.162675	0.4645468	1.491477	Human	B	1.213945e-05	3.148199e-07	MF.9	8.008582e-05	1077661	S	pr	N	HC	0.2849	0.4210	0
5120	140	K	K	516	A	G	AAA	AAG	Syn	A516G	AG	9	7	8	0	0.7977967	0.6640925	1.018852	Mosquito	A	1.210803e-05	6.184859e-07	MF.9	3.594359e-05	1109830	S	pr	N	HC	0.2849	0.4210	0
5121	140	K	K	516	A	G	AAA	AAG	Syn	A516G	AG	9	5	8	0	0.8955443	0.2838118	1.773651	Mosquito	B	1.180995e-05	6.889282e-07	MF.9	5.427843e-05	1141999	S	pr	N	HC	0.2849	0.4210	0
5122	140	K	N	516	A	T	AAA	AAT	NonSyn	A516T	AT	2	7	1	7	0.3627943	0	0.7255886	Human	A	2.37871e-06	1.833534e-07	MF.9	0	1053508	C	pr	D	HC	0.2849	0.4210	0
5123	140	K	N	516	A	T	AAA	AAT	NonSyn	A516T	AT	1	8	1	7	0	0	0	Mosquito	A	2.875636e-06	1.187371e-07	MF.9	0	1117846	C	pr	L	HC	0.2849	0.4210	0
5124	140	K	Q	514	A	C	AAA	CAA	NonSyn	A514C	AC	9	5	8	0	2.704829	1.107984	4.420736	Human	A	2.326514e-06	2.040447e-07	MF.9	0.0001025173	1036993	C	pr	B	HC	0.2849	0.4210	0
5125	140	K	Q	514	A	C	AAA	CAA	NonSyn	A514C	AC	9	7	8	0	0.8595012	0.1375293	22.27062	Human	B	2.288044e-06	1.737362e-07	MF.9	0.0002487606	1069162	C	pr	N	HC	0.2849	0.4210	0
5126	140	K	Q	514	A	C	AAA	CAA	NonSyn	A514C	AC	9	5	8	0	1.415239	0.6642291	2.149033	Mosquito	A	3.286083e-06	1.701643e-07	MF.9	7.929354e-05	1101331	C	pr	N	HC	0.2849	0.4210	0
5127	140	K	Q	514	A	C	AAA	CAA	NonSyn	A514C	AC	9	9	8	0	0.9569402	0.4141197	1.32039	Mosquito	B	2.391816e-06	1.394774e-07	MF.9	8.271806e-05	1133500	C	pr	N	HC	0.2849	0.4210	0
5128	140	K	T	515	A	C	AAA	ACA	NonSyn	A515C	AC	9	5	8	0	2.843857	1.05893	4.628784	Human	A	2.326514e-06	2.040447e-07	MF.9	9.247272e-05	1036994	C	pr	B	HC	0.2849	0.4210	0
5129	140	K	T	515	A	C	AAA	ACA	NonSyn	A515C	AC	9	8	8	0	0.8851508	0.1496004	19.88652	Human	B	2.288044e-06	1.737362e-07	MF.9	0.0002418176	1069163	C	pr	N	HC	0.2849	0.4210	0
5130	140	K	T	515	A	C	AAA	ACA	NonSyn	A515C	AC	9	7	8	0	2.087462	1.139402	3.389248	Mosquito	A	3.286083e-06	1.701643e-07	MF.9	5.20865e-05	1101332	C	pr	B	HC	0.2849	0.4210	0
5131	140	K	T	515	A	C	AAA	ACA	NonSyn	A515C	AC	9	9	8	0	0.9202642	0.5721356	1.180413	Mosquito	B	2.391816e-06	1.394774e-07	MF.9	0.0001205087	1133501	C	pr	N	HC	0.2849	0.4210	0
5132	141	T	I	518	C	T	ACA	ATA	NonSyn	C518T	CT	9	9	8	0	0.4673398	0.3138129	0.5335605	Human	B	0.0002635581	1.843403e-05	MF.9	0.0005311818	1085679	NC	pr	D	HC	0.2470	0.4034	0
5133	141	T	I	518	C	T	ACA	ATA	NonSyn	C518T	CT	9	9	8	0	0.4557661	0.3444019	0.5469354	Mosquito	B	0.0002034795	7.793136e-06	MF.9	0.0003749748	1150017	NC	pr	D	HC	0.2470	0.4034	0
5134	141	T	K	518	C	A	ACA	AAA	NonSyn	C518A	CA	2	7	1	7	0	0	2.351228	Human	A	2.985888e-06	1.847504e-07	MF.9	0	1029752	C	pr	N	HC	0.2470	0.4034	0
5135	141	T	P	517	A	C	ACA	CCA	NonSyn	A517C	AC	9	8	8	0	1.702428	0.6149711	2.743317	Human	A	2.326514e-06	2.040447e-07	MF.9	4.80279e-05	1036996	NC	pr	N	HC	0.2470	0.4034	0
5136	141	T	P	517	A	C	ACA	CCA	NonSyn	A517C	AC	9	8	8	0	1.243538	0.676518	1.650259	Human	B	2.288044e-06	1.737362e-07	MF.9	0.0001804672	1069165	NC	pr	N	HC	0.2470	0.4034	0
5137	141	T	P	517	A	C	ACA	CCA	NonSyn	A517C	AC	8	3	8	0	1.708224	0.7133348	4.19647	Mosquito	A	3.286083e-06	1.701643e-07	MF.9	4.433253e-06	1101334	NC	pr	N	HC	0.2470	0.4034	0
5138	141	T	P	517	A	C	ACA	CCA	NonSyn	A517C	AC	9	8	8	0	1.051304	0.7120389	1.293035	Mosquito	B	2.391816e-06	1.394774e-07	MF.9	2.957442e-05	1133503	NC	pr	N	HC	0.2470	0.4034	0
5139	141	T	T	519	A	C	ACA	ACC	Syn	A519C	AC	9	5	8	0	1.419286	0.4923658	2.346205	Human	A	2.326514e-06	2.040447e-07	MF.9	2.820914e-05	1036997	S	pr	N	HC	0.2470	0.4034	0
5140	141	T	T	519	A	T	ACA	ACT	Syn	A519T	AT	9	5	8	0	1.609233	0.5378244	2.680641	Human	A	2.37871e-06	1.833534e-07	MF.9	2.4683e-05	1053511	S	pr	N	HC	0.2470	0.4034	0
5141	141	T	T	519	A	T	ACA	ACT	Syn	A519T	AT	9	3	8	0	0.9904503	0.5697898	1.35864	Human	B	2.589251e-06	1.43343e-07	MF.9	2.391148e-05	1085680	S	pr	N	HC	0.2470	0.4034	0
5142	141	T	T	519	A	C	ACA	ACC	Syn	A519C	AC	9	0	8	0	1.153844	0.2383281	3.483787	Mosquito	A	3.286083e-06	1.701643e-07	MF.9	8.841694e-06	1101335	S	pr	N	HC	0.2470	0.4034	0
5143	141	T	T	519	A	T	ACA	ACT	Syn	A519T	AT	9	5	8	0	1.018081	0.6234532	1.587696	Mosquito	A	2.875636e-06	1.187371e-07	MF.9	7.073355e-05	1117849	S	pr	N	HC	0.2470	0.4034	0
5144	141	T	T	519	A	C	ACA	ACC	Syn	A519C	AC	9	8	8	0	1.028424	0.3768426	1.363112	Mosquito	B	2.391816e-06	1.394774e-07	MF.9	2.631194e-05	1133504	S	pr	N	HC	0.2470	0.4034	0
5145	141	T	T	519	A	T	ACA	ACT	Syn	A519T	AT	9	6	8	0	0.788498	0.3993039	0.9920488	Mosquito	B	2.369747e-06	1.784832e-07	MF.9	1.461775e-05	1150018	S	pr	D	HC	0.2470	0.4034	0
5146	142	E	A	521	A	C	GAG	GCG	NonSyn	A521C	AC	9	8	8	0	0.7358683	0.288065	2.181003	Human	A	2.326514e-06	2.040447e-07	MF.9	3.699319e-06	1036999	C	pr	N	HC	0.2129	0.3908	0
5147	142	E	D	522	G	T	GAG	GAT	NonSyn	G522T	GT	9	4	8	0	4.076422	0.4269777	7.939294	Human	A	5.90433e-06	1.997031e-07	MF.9	6.356756e-05	1053514	C	pr	N	HC	0.2129	0.3908	0
5148	142	E	D	522	G	T	GAG	GAT	NonSyn	G522T	GT	9	7	8	0	0.9609341	0.2753333	7.461733	Human	B	7.052585e-06	4.58263e-07	MF.9	0.0001825158	1085683	C	pr	N	HC	0.2129	0.3908	0
5149	142	E	D	522	G	T	GAG	GAT	NonSyn	G522T	GT	9	7	8	0	1.158334	0.4134966	1.754635	Mosquito	B	7.493022e-06	1.393832e-06	MF.9	2.440297e-05	1150021	C	pr	N	HC	0.2129	0.3908	0
5150	142	E	E	522	G	A	GAG	GAA	Syn	G522A	GA	9	9	8	0	1.072735	0.93675	1.341999	Human	A	6.69739e-06	4.668841e-07	MF.9	8.600317e-05	1029754	S	pr	N	HC	0.2129	0.3908	0
5151	142	E	E	522	G	A	GAG	GAA	Syn	G522A	GA	9	9	8	0	1.175668	0.4646326	1.926837	Human	B	7.684204e-06	4.645403e-07	MF.9	0.0002055925	1061923	S	pr	N	HC	0.2129	0.3908	0
5152	142	E	E	522	G	A	GAG	GAA	Syn	G522A	GA	8	3	8	0	1.098761	0.6181453	1.605306	Mosquito	A	8.774931e-06	2.38219e-07	MF.9	2.408617e-05	1094092	S	pr	N	HC	0.2129	0.3908	0
5153	142	E	E	522	G	A	GAG	GAA	Syn	G522A	GA	9	8	8	0	1.147254	0.8615518	1.331963	Mosquito	B	6.112924e-06	3.730988e-07	MF.9	0.0001494682	1126261	S	pr	N	HC	0.2129	0.3908	0
5154	142	E	G	521	A	G	GAG	GGG	NonSyn	A521G	AG	9	9	8	0	1.229323	0.3443276	2.114318	Human	A	1.14325e-05	8.091075e-07	MF.9	6.288843e-05	1045496	C	pr	N	HC	0.2129	0.3908	0
[truncated: 48,729 more rows]
