# Supplementary material for: Principles of dengue virus evolvability derived from genotype-fitness maps in human and mosquito cells
Source: eLife journal article supplement (doi:10.7554/elife.61921), 2021-01-25
Supplement: supp [file elife-61921-supp-v1.zip › elife_poa_e61921_Supplementary_file_2.txt]

N	Human	A	0.087941934	N	Human	A	2.718942e-04	0.08790	2.7e-04	0.0879+/-0.00027
N	Human	B	0.070149757	N	Human	B	1.666067e-04	0.07010	1.7e-04	0.0701+/-0.00017
N	Mosquito	A	0.096001367	N	Mosquito	A	1.077655e-04	0.09600	1.1e-04	0.096+/-0.00011
N	Mosquito	B	0.057304260	N	Mosquito	B	7.370619e-05	0.05730	7.0e-05	0.0573+/-7e-05
D	Human	A	0.067727068	D	Human	A	3.119752e-04	0.06770	3.1e-04	0.0677+/-0.00031
D	Human	B	0.214018987	D	Human	B	5.130083e-04	0.21400	5.0e-04	0.214+/-5e-04
D	Mosquito	A	0.175449334	D	Mosquito	A	2.210734e-04	0.17540	2.2e-04	0.1754+/-0.00022
D	Mosquito	B	0.184057347	D	Mosquito	B	2.302184e-04	0.18410	2.3e-04	0.1841+/-0.00023
L	Human	A	0.011106824	L	Human	A	6.777679e-05	0.01110	7.0e-05	0.0111+/-7e-05
L	Human	B	0.013607572	L	Human	B	7.252896e-05	0.01360	7.0e-05	0.0136+/-7e-05
L	Mosquito	A	0.029107983	L	Mosquito	A	5.386766e-05	0.02910	5.0e-05	0.0291+/-5e-05
L	Mosquito	B	0.025295645	L	Mosquito	B	6.979167e-05	0.02530	7.0e-05	0.0253+/-7e-05
B	Human	A	0.001924984	B	Human	A	3.664507e-05	0.00190	4.0e-05	0.0019+/-4e-05
B	Human	B	0.002588323	B	Human	B	4.149932e-05	0.00260	4.0e-05	0.0026+/-4e-05
B	Mosquito	A	0.001842377	B	Mosquito	A	1.279844e-05	0.00184	1.3e-05	0.00184+/-1.3e-05
B	Mosquito	B	0.002954408	B	Mosquito	B	1.530724e-05	0.00295	1.5e-05	0.00295+/-1.5e-05
