# Supplementary figures and images for: Principles of dengue virus evolvability derived from genotype-fitness maps in human and mosquito cells
Source: eLife journal article supplement (doi:10.7554/elife.61921), 2021-01-25

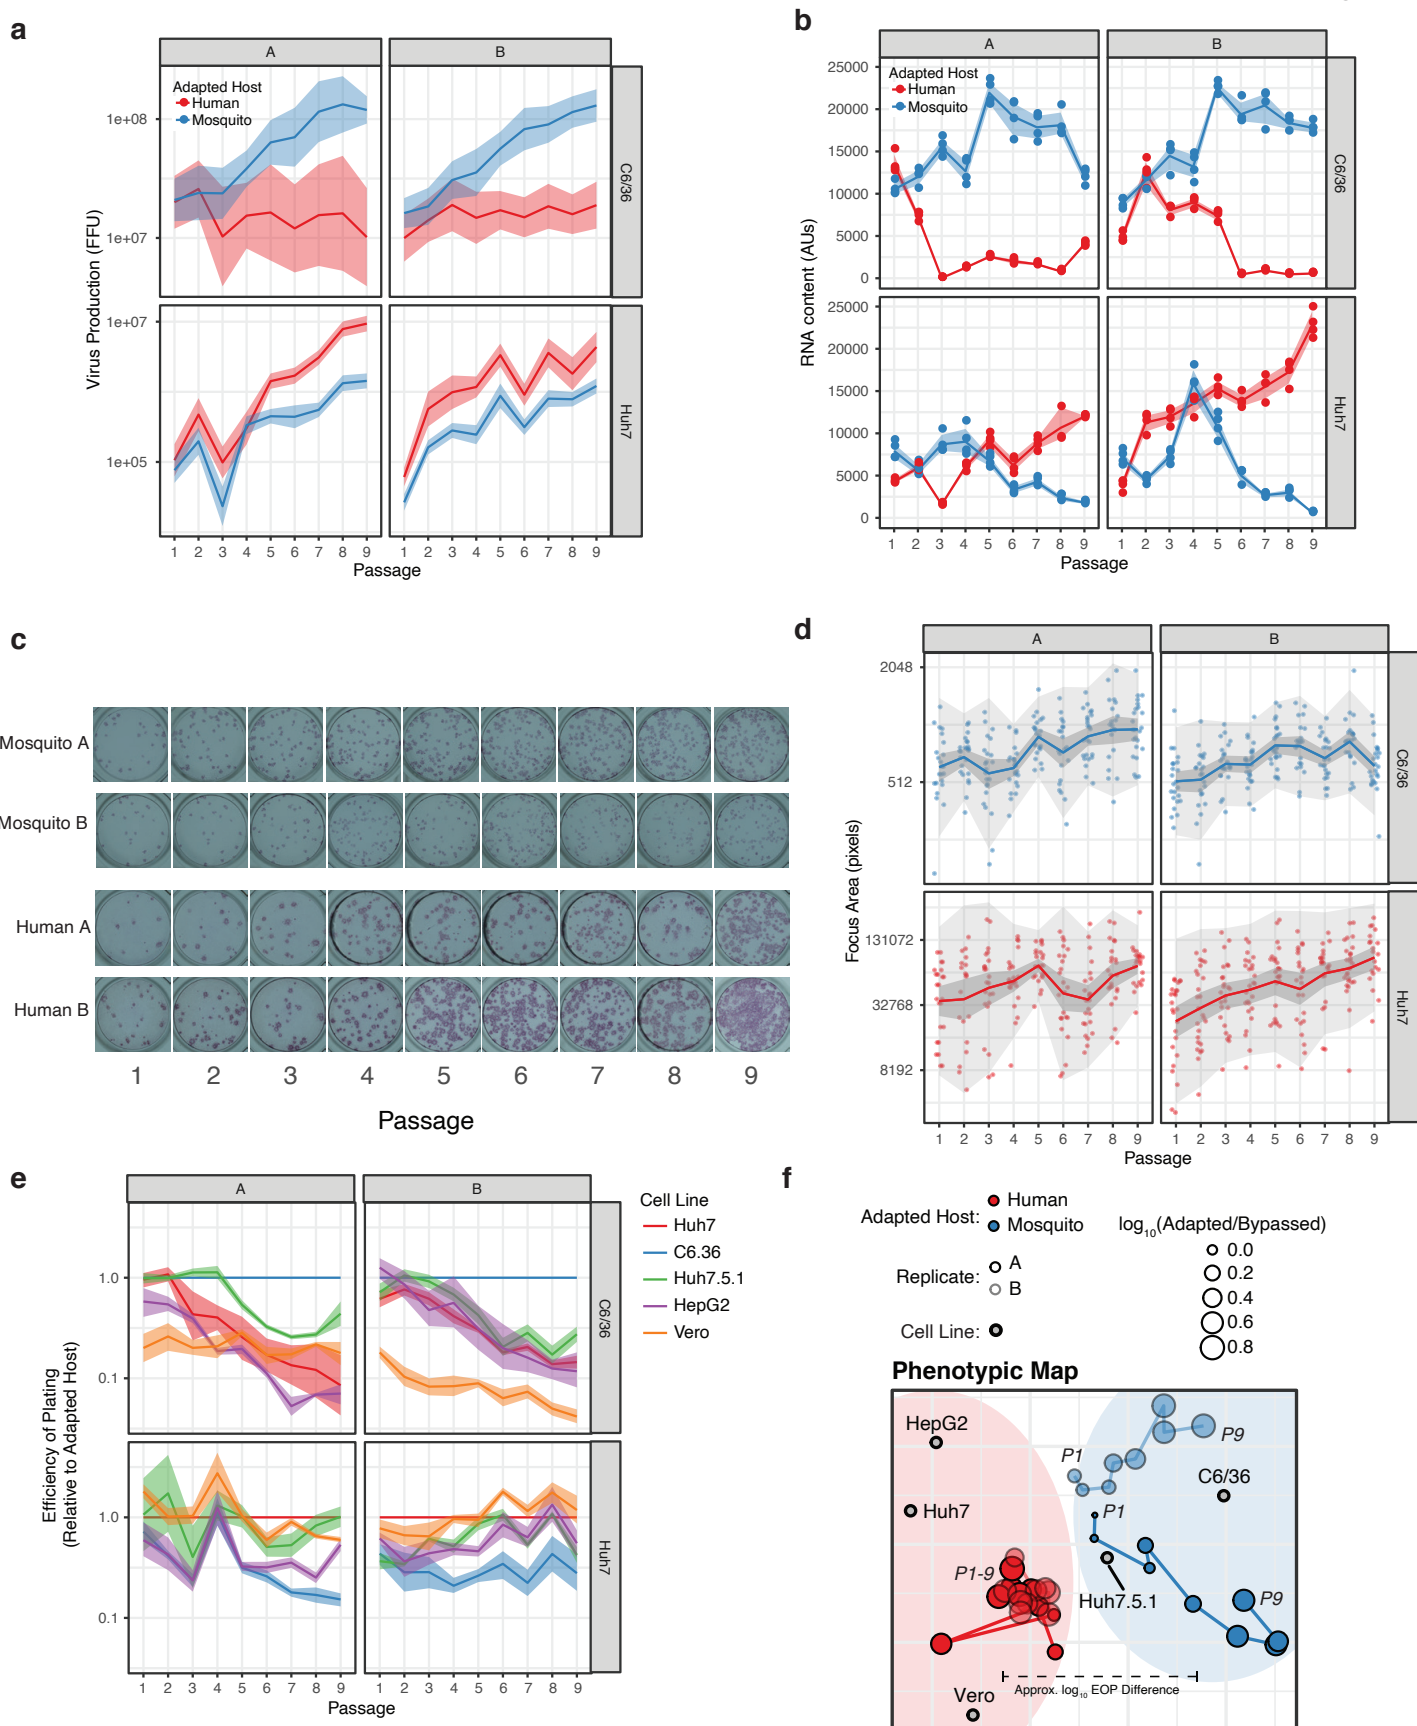

Supplement: supp [file elife-61921-supp-v1.zip › elife_poa_e61921_Figure_1_figure_supplement_1.pdf]

**a**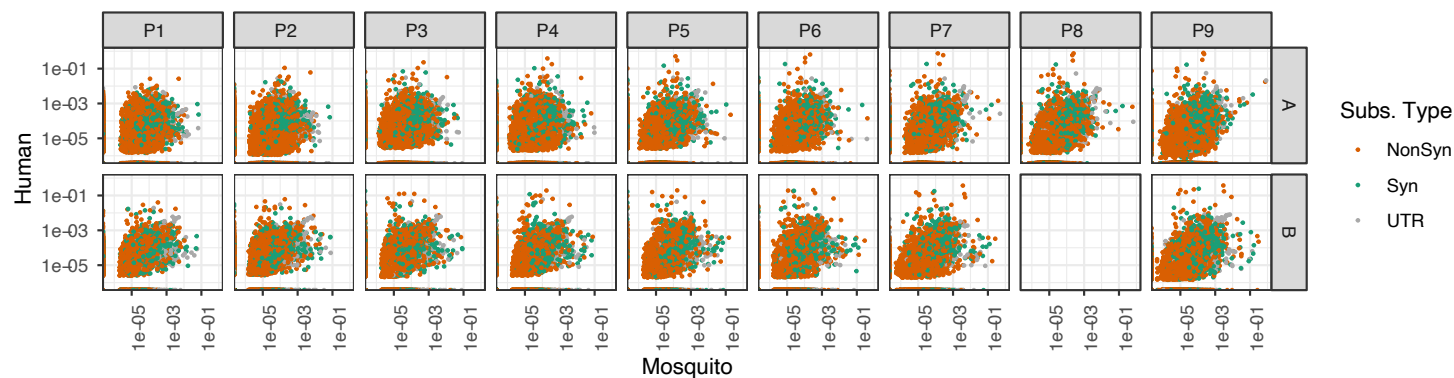**b**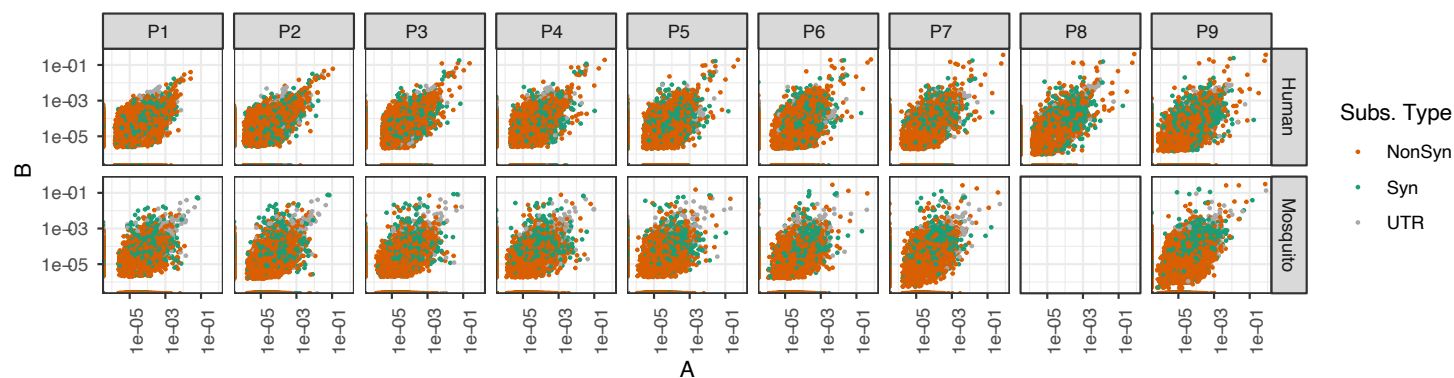**c**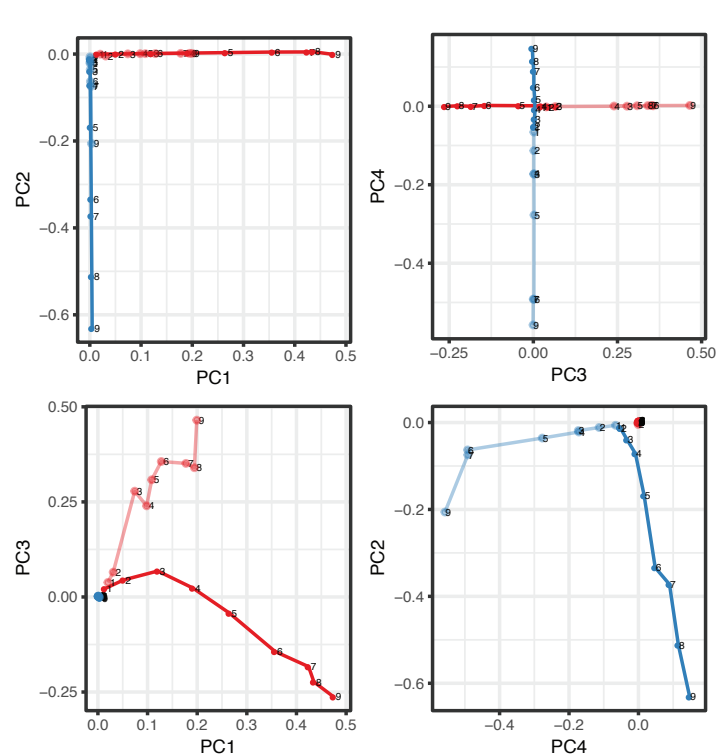**d**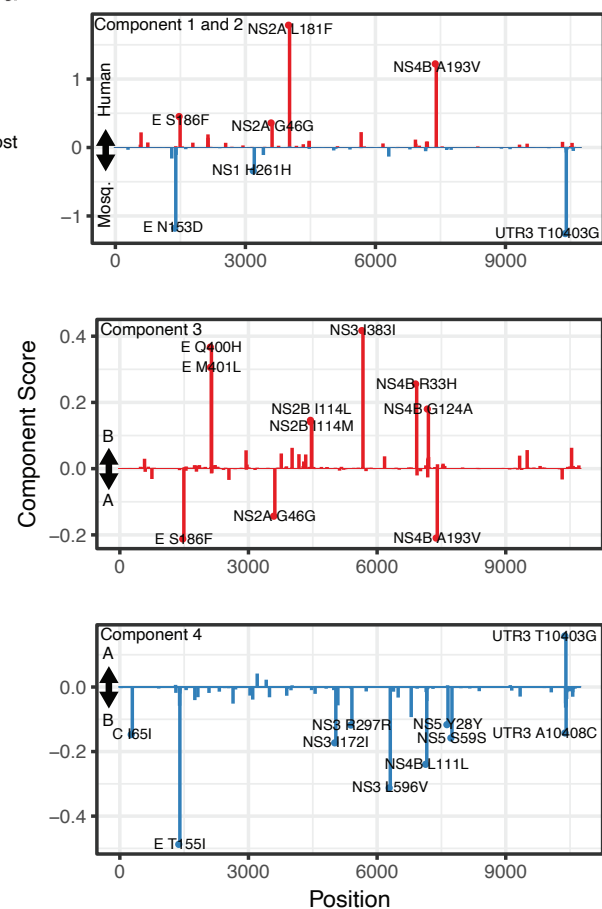

Supplement: supp [file elife-61921-supp-v1.zip › elife_poa_e61921_Figure_2_figure_supplement_1.pdf]

**a**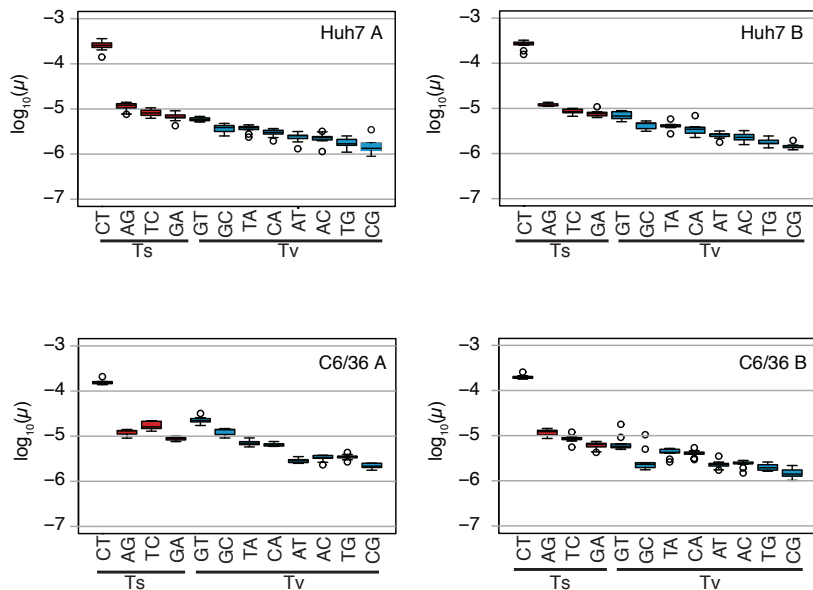**b**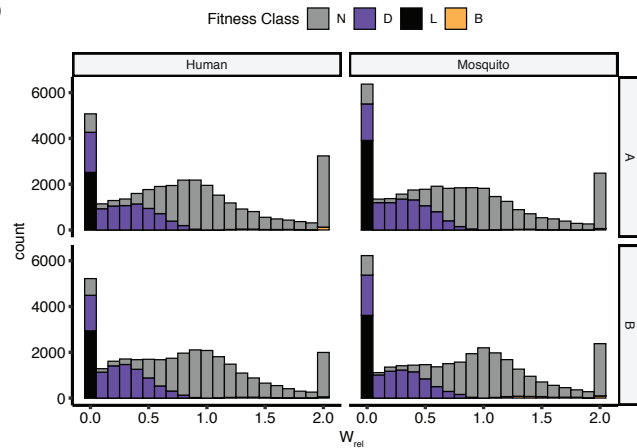**c**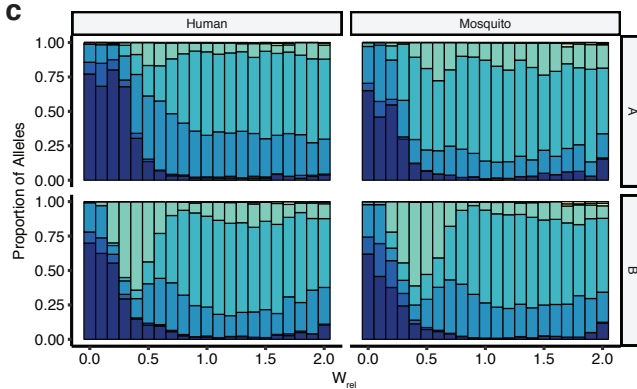**d**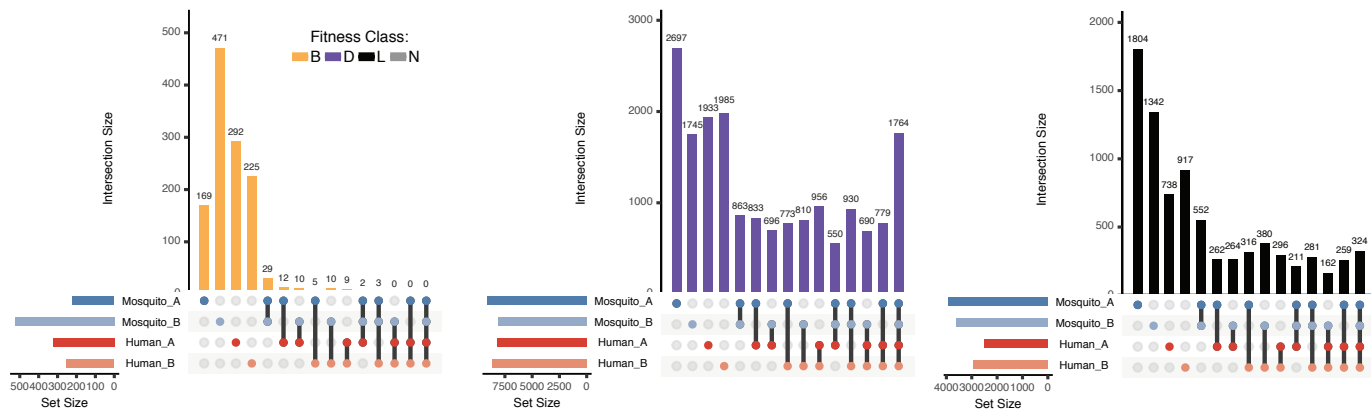

Supplement: supp [file elife-61921-supp-v1.zip › elife_poa_e61921_Figure_3_figure_supplement_1.pdf]

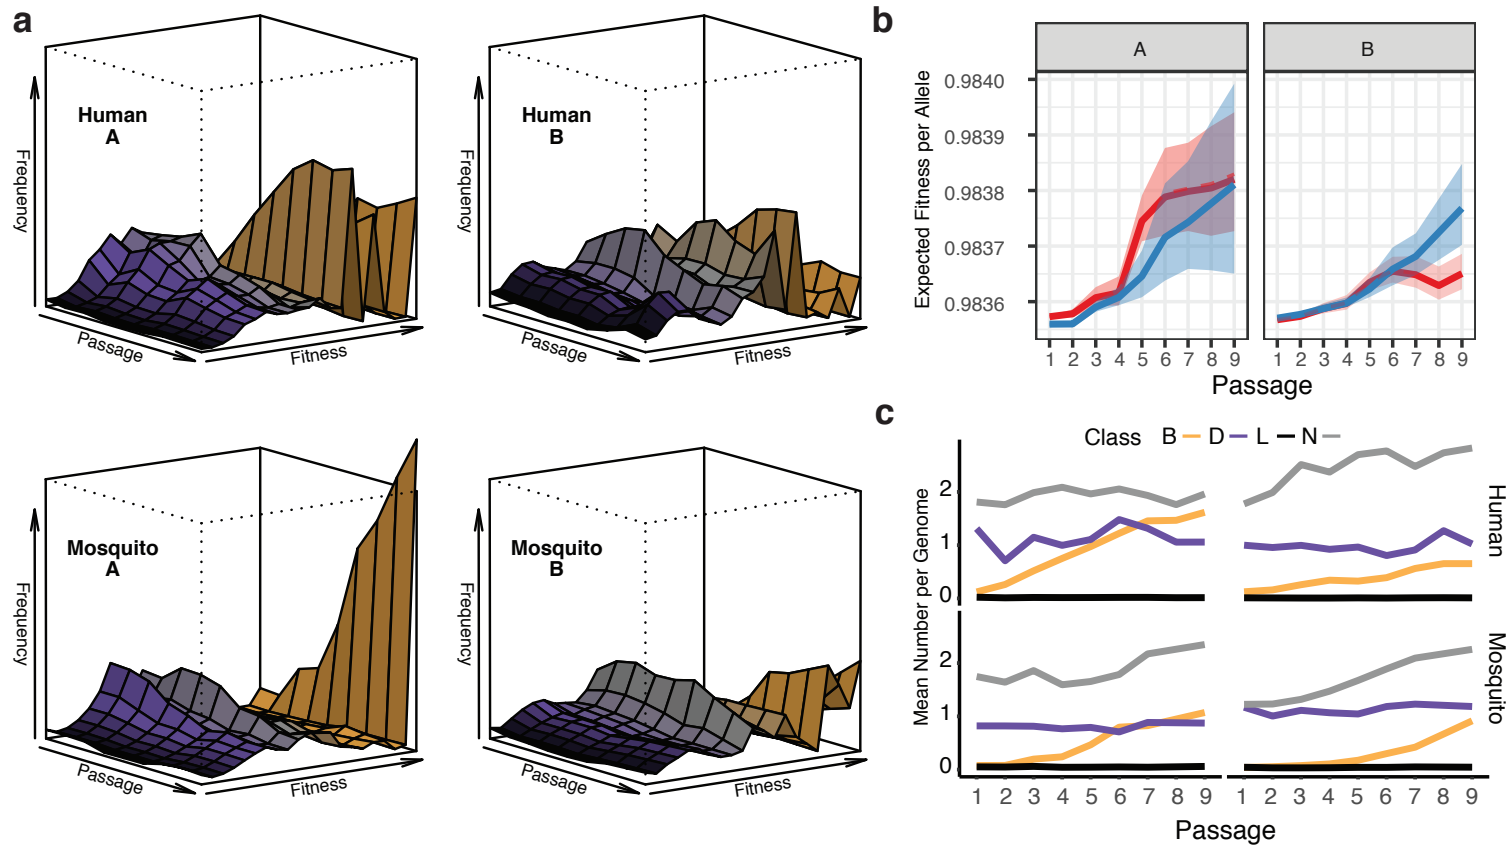

Supplement: supp [file elife-61921-supp-v1.zip › elife_poa_e61921_Figure_4_figure_supplement_1.pdf]

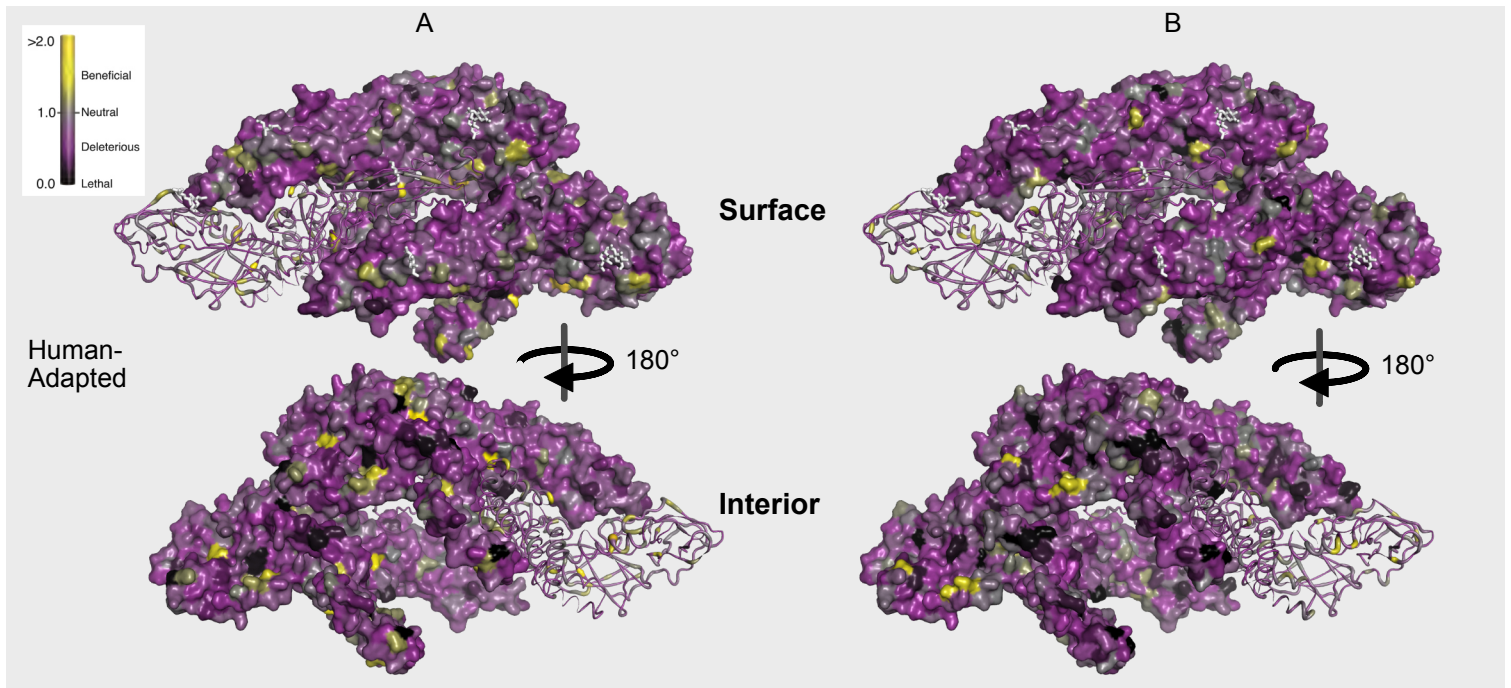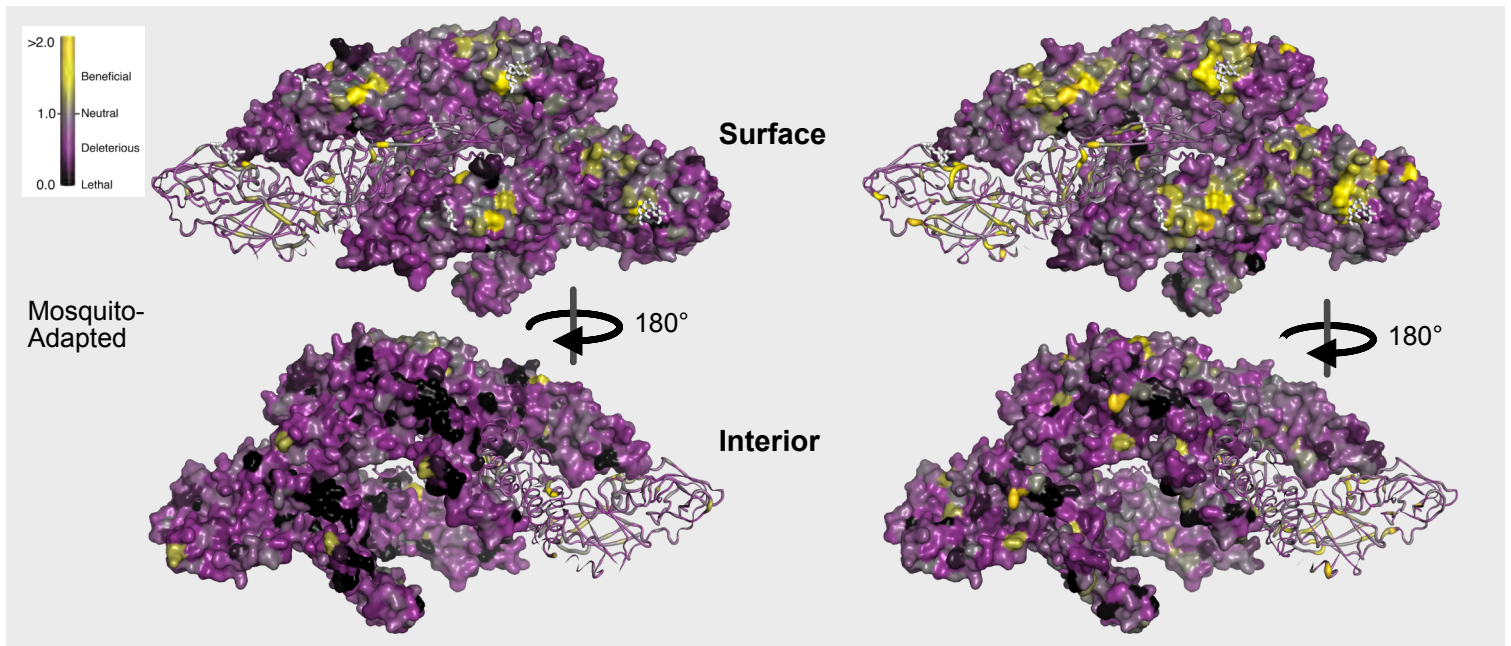

Supplement: supp [file elife-61921-supp-v1.zip › elife_poa_e61921_Figure_5_figure_supplement_1.pdf]
